# Supplementary material for: Genomic Signatures After Five Generations of Intensive Selective Breeding: Runs of Homozygosity and Genetic Diversity in Representative Domestic and Wild Populations of Turbot (Scophthalmus maximus)
Source: Front Genet. 2020 Apr 3;11:296. doi: 10.3389/fgene.2020.00296 (PMC7169425; doi:10.3389/fgene.2020.00296)
Supplement: Supplementary file 2 [file Table_2.XLSX]

## Sheet: 09052019_wild
Supplementary Table 2. Main features of the 25,681 SNPs identified using the ddRAD methodology in the wild turbot population.
SNP_ID	chrom	pos in chrom	pos in RAD-tag	strand	Reference allele	Alternative allele	RAD-tag sequence	stacks_ID
smaw_01_50253	C01	50253	206	-	G	T	GAGACAAGTGGTGAGGAGTCAACCAGAAACAACCAATCAGAGCCCAGAGTCTGGATCTATTTCTTGTTTGTTTGTCATCAGGCTGNNNNNNNNNNNNNNNNNNNNNNNNNNNNNNNNNNNNNNNNNNNNNNNNNNNNNNNNNNNNNNNAGGTGCTCAGGGATGGAGGTTACCATGGAAACACTGAGGCGACAGAACGTCTGTGTGCAGGGGCTGCTCACTCAGGTAGGTCAAAGGTCAAAGTTCTCCGGTCCAGGGGCGTCTGTTAGCT	30:206:-
smaw_01_50525	C01	50525	59	+	T	C	TTCCTGACTTCTGTCGTCAGGGGCGACGCCTTCACAACAACAACAACAACAACAACAATAAGTTACATTCAACAAATAAGCATCANNNNNNNNNNNNNNNNNNNNNNNNNNNNNNNNNNNNNNNNNNNNNNNNNNNNNNNNNNNNNNNNNNNNNNNNNNNNNNNNNNNNNNNNNNNNNNNNNNNNNNNNNNNNNNNNNNNNNNNNNNNNNNNNGATGACATGTTAAATTCAAGATAAAGTTTGAAACTTTCACGTTTCGTAGAAATATTCCATCTGATTTCACACCTGTCTCACCTGT	31:59:+
smaw_01_66367	C01	66367	11	+	G	C	GGAACCTGCTGGTGGAGAACATCATCGACATGTACAAGCAGCAGCAGGAGAGTCGGGGCGGCGGCGAGGACCCGCCCCTGAAGGANNNNNNNNNNNNNNNNNNNNNNNNNNNNNNNNNNNNNNNNNNNNNNNNNNNNNNNNNNNNNNNNNNNNNNNNNNNNNNNNNNNNNNNNNNNNNNNNNNNNNNNNNNNNNNNNNNNNNNNNNNNNNNNNNNNNNNNNNNNNNNNNNNNNNNNNNNNAGAAGAGCGAGCTGTGCGCCGCCGTGGAGCAGCTGGCCGCAGGAAACGGCTGCGTCCAGGCCGCCGTGGCCCAGATGGACGACACC	48:11:+
smaw_01_85037	C01	85037	65	-	A	T	TGGAAGATGCAGAAGAGACATTGTCATGGTGATTCAGGTGTTCCTCTGAGCGATGGATGGTGATTGGTTGTTGGTTCTCACGGGCNNNNNNNNNNNNNNNNNNNNNNNNNNNNNNNNNNNNNNNNNNNNNNNNNNNNNNNNNNNNNNNNNNNNNNNNNNNNGGGGGTTCCTCTGGTACTCGTCCTCGTCAGAGGTGTCTACGTACTGTTGCCGAGCAACCGACGAGCTGATCTTAGACAGTGAACG	51:65:-
smaw_01_96907	C01	96907	29	-	C	T	GAGGGTCATAAGCCCCGCCCCCTGGTGTGTGGCTGCAATGCGGGTCATAAGCCCCCATCAGTGTGATGAGTTCTTATCACACTGANNNNNNNNNNNNNNNNNNNNNNNNNNNNNNNNNNNNNNNNNNNNNNNNNNNNNNNNNNNNNNNNNNNNNNNNNNNNNNNNNNNNNNNNNNNNNNNNNNNNNNNNNNNNNNNNNNNNNNNNNNNNNNNNNNNNNNNNNNNNNNNNNNNNNNNNAGCTGCCTCCACAGGCGGCGCTGTGACACCAGCTGTTGTCGTCTGTGCAGATCTTCATGTTCCAGCTGTTGCGAGGCCTCAGCTT	63:29:-
smaw_01_126882	C01	126882	251	-	C	T	TGACCTCACCATCATGACCTCATTATCGTCATGACATCATGACATCGTGATAATTATTGATCTGTGGCAGGACTGTTGTCCTCAGNNNNNNNNNNNNNNNNNNNNNNNNNNNNNNNNNNNNNNNNNNNNNNNNNNNNNNNNNNNNNNNNNNGTCACATTCTCATTGGCTCCTCAGAATCCCGTTGTGCACTTTGACCTCCCGCTGCGGTTGGACGGCTGGTTTCCAAGGCAACAGGTGCGACAGAAGCGCGAGGAGATCCGCAATGTGAT	75:251:-
smaw_01_134273	C01	134273	68	-	C	T	GTGACATGCACGTCTCTGATTGGTGGAAACTCTTACTACACACGTCAACTTCATGTGGGCGAGTGATGCTGCGTTCCATTGTACTNNNNNNNNNNNNNCAGGGGCGTTCCATTAAACCTCAGAACTCGACATCACAGACCTGCGAGTCGGAGGTTTACACTCGAACGCCTCCTTGAGTCGGAG	89:68:-
smaw_01_150956	C01	150956	263	+	G	C	TTGGTTGGGAGGGAGGACCTTTTGTTTGGAGGAATCCTCTGCTCTGGTAGCTGGAGAGCTGTGTTTGTTGCTGGAAAAATCATTGNNNNNNNNNNNNNNNNNNNNNNNNNNNNNNNNNNNNNNNNNNNNNNNNNNNNNNNNNNNNNNNNNNNNNNNNNNNNNNNNNNNNNNNNNNNNNNTGTCTCGCTCATTGTCACTCTTTGGGGAGCTGTCAGCATCCTTCCTGTACAGTTCTGTGTTACAGAGTTTAGTCTGGTTGTTAGA	102:263:+
smaw_01_152573	C01	152573	51	-	C	T	AGCTGATGGTGTGGGGCTCGTTCTACCCAGTAATAAGCAGTCAGACCCAGGCCTGAATGGTGCTGGTGGGTTCCTGAGGTTGCCCNNNNNNNNNNNNNNNNNNNNNNNNNNNNNNNNNNNNNNNNNNNNNNNNNNNNNNNNNNNNNNNNNNNNNNNNNNNNNNNNNNNNNTCATCCACCAGCAGCTGGCATATCAGTCTTTGTGTGCCGCTGGGGCAGAAAGCAGCACAACTGGGGAAGACAGACTTTTCTACCAG	105:51:-
smaw_01_172861	C01	172861	37	+	T	C	AGCAGCTGTACTATTACTTTCAGTTACAATCACGTGTTTGCTTCATAGATCCACACCAGTCTGAGCATACATCATCCAGAAGGAGNNNNNNNNNNNNNNNNNNNNNNNNNNNNNNNNNNNNNNNNNNNNNNNNNNNNNNNNNNNNNNNNNNNNNNNNNNNNNNNNNNNACGCTGTATCTGCTGCTGTTTCAGCTGGAGAGCAATAAGTCGCTGTACGACTTCTCCTGCGTGTCCTACGACTACAACGTGGACGACTGGAGCGTCGCCGGGAGC	121:37:+
smaw_01_178489	C01	178489	242	-	T	C	CAGGCACCAGGGGGCGATAGAGTTGATTTGGTTTCATGTCGTCCATCTTTATTTACAGTCTGTGATCAGACAATTCCTGTTTCTCNNNNNNNNNNNNNNNNNNNNNNNNNNNNNNNNNNNNNNNNNNNNNNNNNNNNNNNNNNNNNNNNNNNNNNNNNNNNNNNNNNNNNNNNNNNNNNNCTCACACTCACCAGGACCCAGTGGTGGAGGAAAACCCCTGACAGCACTCATGAAGTCACCAAACCAAACATTGTAACTCCACATCTGCTTCCAGTAAGAGGAGGCCGGACCAGATCCTCCACAACGTTTCTACTGAGTAGCTTTAATGTGT	128:242:-
smaw_01_178846	C01	178846	41	+	T	C	CAGACACCAGGGGGCGATAGAGATGATTTGGGAGCTGACATGACGTCTATCTTGATTCAGTCTGTGATCAGAACACAAGACGACANNNNNNNNNNNNNNNNNNNNNNNNNNNNNNNNNNNNNNNNNNNNNNNNNNNNNNNNNNNNNNNNNNNNNNNNNNNNNNNNNNNNNNNNNNNNNNNNNNNNNNNNNNNNNNNNNNNNAAAAATAACTTGTTCTGTGCACAAACTAAGTGTTGAGTGGATCTGAGGCAAACGAGTGGTGTTTGATTTACTGACGACAGATGAA	131:41:+
smaw_01_187323	C01	187323	14	+	G	A	AGGAAACACACAAGCATGTCACGATCCAGGCTCCACCCAGTTTACTGGAAACAGACAGGAAGTGAGCTCGAACCAGGTGTCGTCGNNNNNNNNNNNNNNNNNNNNNNNNNNNNNNNNNNNNNNNNNNNNNNNNNNNNNNNNGCTGCTGGGACTTTGGGTTTGAGGATCGGCAGCAACTTGTCCGTCTGCTTGAAGTTGTTCAACTTGTCTGATGGAATGAATGTGTAGAGAAAGATAAGCGTGAACGAGTGACGGTGAACCTGTGCTCGGACAGATCTGATTGGTCCTTCACTCCCACCTGTCTCTCCAGGTGTCCCCACCAGGTTGGGCCTCTTGT	138:14:+
smaw_01_211001	C01	211001	172	-	G	A	TCGTGATGAGGTTGAGATTTTAGAGGAGCAGCAAATCGGCTCCCCTGATCCAACGACCACACCGACACACACAGTGACTGAAGGCNNNNNNNNNNNNNNNNNNNNNNNNNNNNNNNNNNNNNNNNNNNNNNNNNNNNNNNNTCCCGTCTCAACTTCATCCATAAACTCACACCACAGCAACATCATGGCACTCTCGCCTGAGAAGGAGTCGCCGTTCACTCGAGTG	155:172:-
smaw_01_212734	C01	212734	78	-	C	T	TGAGAACTTGTTGCCTTCTGGCAAACCTACGAGCCGACCAGCTGACACCCTCGAGAACATGGTGAGTACCAAACGTCGGACTTGANNNNNNNNNNNNNNNNNNNNNNNNNNNNNNNNNNNNNNNNNNNNNNNNNNNNNNNNNNNNNNNNNNNNNNNNNNNNNNNNNNNNNNNNNNNNNNNNNNNNNNNNNNNNNNNNNNNNNNNNNNNNNNNNNNNNNNNNNNNNNNNNNNNNNNNNNNNNNNNNNNNNNNNNNNNNNNNNNACGACTTCCTGTTCGACCCCTTCGTCGCGTGGAAAGATCCTCAGAGCGGAGGGGTGAGCGAGAACGACGTCTTTATGTTCGACGAGAGTGCGG	160:78:-
smaw_01_232896	C01	232896	201	-	C	T	CGTACAAGACCAAGAACCCTGAAGGATCATGGGAGGACTGGGTGAGTGTGAAGAATAGTGACGGTGATGATGTGACCTTTAAGTTNNNNNNNNNNNNNNNNNNNNNNNNNNNNNNNNNNNNNNNNNNNNNNNNNNNNNNNNNNNNNNNNNNNNNNNTTGACATACTTTGTTCTCATCGATACATTTTCATGTGTCCGTTGGTTGAACACTTTCTTGCTGCCGTCTCGTCTCAGGTGAAAGCNNNNNNNNNNNNNNNNNNNNNNNNCAGCGCCAACGGGTTTTACAAGTGAGTTCAGTCCACGAGACGCTGGTTCAGTCAGTCTGAAGTGGAGTGACACTGTTTCCTCTCTGCCCTCAGGACTCCCGACATCGGTTACGACT	180:201:-
smaw_01_239638	C01	239638	233	-	G	A	CCAACAGTCTGGAAGAGTTTCTGCATCTGAAATGGAAACATCCCGACGCCCGAGTGGTCGTGGGAAACACTGAAGTGGGTCAGTCNNNNNNNNNNNNNNNNNNNNNNNNNNNNNNNNNNNNNNNNNNNNNNNNNNNNNNNNNNNNNNNNNNATTCATTCATCCAGTCATCCAGTCATCCATTCATGACACTCTGTTTGTAGGTATCGAGGTGAAGTTTAAGAACATGTTGTACGCG	190:233:-
smaw_01_293507	C01	293507	306	-	G	T	TACCTGCTGCTGCGGACTCACCAGCTGCCACTCGACGCCTTCCTGGTGGCTCTGAGGATGATGCAGGTGGAGGACGTGGACTTGGNNNNNNNNNNNNNNNNNNNNNNNNNNNNNNNNNNNNNNNNNNNNNNNNNNNNNNNNNNNNNNNNNNNNNNGTGGACAATCACTCAAACCTCACTGTTTCCTGTTTCCCGTTTCCTGTCAGGGTCACATCAAAGGTTACATCTCACATCAGCACCAGAAGCTCGTGGTCAGTAAACAGAACCCGTTCCCTCCGCTCTCCTCCGTCTCCTAGACTACGTTACCGAC	236:306:-
smaw_01_293832	C01	293832	12	+	G	T	CAGGGGCCAGAGGTCAGGCTGTGATGAAGGAGCGCTGCTCATCAGGGGGAGGGACGAGGAGGAGGAAGAAGAGGAGGAGGAGGAGNNNNNNNNNNNNNNNNNNNNNNNNNNNNNNNNNNNNNNNNNNNNNNNNNNNNNNNNNNNNNNNNNNNNNNNNNNNNNNNNNNNNNNNNNNNNNNNNNNNNACAAAGAAAATACACAAGTGCTAAAAAATATTGGACATTTAACATTTATTTTATTCCTCACATTCAACCTCTGGGTCACAGGTCAG	237:12:+
smaw_01_315772	C01	315772	72	+	C	A	TCTCTGGTTCCGCCGTTCCCTCGATGTAAGTCGTTATGACAGATCAGACACACACTGTCTGCGTCGCTCTGCAACACACACACACNNNNNNNNNNNNNNNNNNNACAAACCCAGCAATGACCTTTGACCTCGGCCCCCTCACCCACCAGCGACATGACGTTGCGTCTCCTGAACTGGCCCCTCCTCTCGGGCGCCACGGCCTCGGGGATCGTGGGTATGAGGGAGGGTCTCCGCTCCAGTGAGGGGGCGGCGGCCTCCTGCTGCGAGGAGGGCAGCAGGCGGCGGGAGGAGGAGCGACGCAGCAGCA	248:72:+
smaw_01_321098	C01	321098	4	+	C	T	TGACGGAGGAAGTGAGGGAACATCTGAAAACTCCCATTTTCGACAACTGGTGAGGACACACGCACGCACGCACACACACACACACNNNNNNNNNNNNNNNNNNNNNNNNNNNNNNNNNNTGTGGTCACCTCCAGGCAGTGGGAGGAGGCGGAGATGCTGGTGCTGCTCCAGGTGATGTACACGGACCTGGACTTCCTGACGGCGT	258:4:+
smaw_01_330795	C01	330795	230	-	C	G	CCACCGTGTCAGAGACACAGTCCCTTGTCCTCACATACTGGGGGCGGTTGGTGAGGTAGTCGATTATCCAGGATGTGAGGTAGTGNNNNNNNNNNNNNNNNNNNNNNNNNNNNNNNNNNNNNNNNNNNNNNNNNNNNNNNNNNNNNNNNAGAAATCAAAGAACATGATTCCCACAGTGCTTCCAGGCTTCTCCAGGTGAGAAAGAGCTCTTTGGAGGAGGAAGATGATGGCGTCGT	270:230:-
smaw_01_346598	C01	346598	60	+	C	T	TCATCAGATTCACGTGATGACATCACACACGTCTGACCTGTGGACCTTTTCCTCTTCCTCGCCTCCTCCCATCATGCATCACTTCNNNNNNNNNNNNNNNNNNNNNNNNNNNNNNTCTCCCTCGTCACTCAGTTACCACGGAAACACTCGTCATGTCAAGGTTACGATTATTTTACACTCAATAACAGACTTACTTCACTGTTTACTTTCCAACGTACCGATTCACACACTTCCTCCTTTTTCCAGGTCACCTCCCCTCATCACTTCCCTCCTCTCCCG	280:60:+
smaw_01_356823	C01	356823	28	+	T	G	TCAACTCAAACTGTAAAAACTAAAGTTTTTTTTTTTACAGTAGTTTCATCTTCAACCAGGCCACAACAAGAAAACTCCAAACAAANNNNNNNNNNNNNNNNNNNNNNNNNNNNNNNNNNNNNNNNNNNNNNNGCTTCCTGTGTCTGGATCCAGCTTCAGGCGACTCACACAGTCGGACTCCTCCTCACTCCAAAGGTCCTGCTGCCTGAACACAAGANNNNNNNNNNNNNNNNNNNNNNNNNNNNNNNNNNNAGGGATGGGAGCGCAGGAGAAGAAGAAGAAGGGCGAAGAGGAGGAGGAGGTGGGGAAGAAACAGAAAAGCTCCAAAGAAGTTTAT	285:28:+
smaw_01_372671	C01	372671	32	+	A	G	GAAACAACACTGACCTTCTTCCTCTACAATGAACAAAACACACATCTCTGACAGATAAATCACGTCTGATGTCGTAACTGTCACANNNNNNNNNNNNNNNNNNNNNNNNNNNNNNNNNNNNNNNNNNNNNNNNNNNNNNNNNNNNNNNNNNNNNNNNCATCCAAGTCAAGGAAAAAACATTAAAGCCCAAGCTATAATTTACATCCTAAGTAAATATTAAGGGTAATTAAGAGTCAGACAGANNGCGAGAGGGGCAGGTGCTCACCTGCCCATAGGTCCCACGGCGACGGTGCAGTTCCCGCCAAGCGTCAGGTTCCCGCCCTTAGTGAACGCCTC	296:32:+
smaw_01_412833	C01	412833	47	+	G	A	GCTTGAGCAGTGACCATGGGACAGGGGGGTGTAGCCACTTTGAAACGATGGCTTGGAGACTTGTCAAGGCTTGGTCGGGGGAGGGNNNNNNNNNNNNNNNNNNNNNNNNNNNNNNNNNNNNNNNNNNNNNNNNNNNNNNNNNNNNNNNNNNNNNNNNNNNNNNNNNNNNNNNNNNNNNNNNNNNNNNNNNNNNNNNNNNNNNNNNNNNNNNNNNTTGGGGGAGGAGGGATGTTGGTTAACGATGACCTTGTGAACATTAGAGCATGATGGCAGGTCTGCCTGACAGTGTAGGAGTAGGA	330:47:+
smaw_01_418537	C01	418537	236	+	A	C	CTCATTAATATTCATGAGCTAACAGTGTCCATGATATTAATTGTGTGTCAGGTGTGTGTGTGTGTGTGTCTGTCACTAACCATCTNNNNNNNNNNNNNNNNNNNNNNNNNNNNNNNNNNNNNNNNNNNNTGGTCCAGGCCAGTGGAGGACAATTGGGAGGCGGGGCACGCCTGGTGAAGCCGTGAGCTGGCAGGTCCGCCATAACCTCGCTGAGNNNNNNNNNNNNNNNNNNNNNACACACACACACACACACACACACACACACACACACACACACACACACGGTCATACATACATGACAAAGAACAGCAGTAAGTGAG	333:236:+
smaw_01_430602	C01	430602	51	+	A	C	GGAAAGATTTAAAAAATAAACAACCCATATCATTCTACGGAGGAAACCCGACAAACTCAAAGTCACATAATGATCCAGCTCCTGANNNNNNNNNNNNNNNNNNNNNNNNNNNNNNNNNNNNNNNNNNNNNNNNNNNNNNNNNNNNNNNNNNNNNNAAGGTGACCGTGGCGACGTCACCGCCTCGTCCTCCCTGTCGGAGCTCGTCCATCAGTTTCTGATCATAATGAGAAAAGATGAAACAAAAGAAGGAAACTGCAC	347:51:+
smaw_01_431077	C01	431077	32	-	G	A	ACAAGCCGTCGGCCAGCTTCACGCCTCGCCGCGACGACCACGACGACGAGTTCTGTGACGGAGACGGTGACGACTTCGGCGACCTNNNNNNNNNNNNNNNNNNNNNNNNNNNNNNNNNNNNNNNNNNNNNNNNNNNNNNNNNNNNNNNNNNNNNNNNNNNNNTTGATGGACTGCCAGTTGTTCAGGCCTGAGTGGTGATTGGTTGACAGGCAGCAGGGGATTCTGGGACAGGAAGCACCAAGCAGAGCCATATACGGTACCGAGCCCCTTCAACTT	348:32:-
smaw_01_434701	C01	434701	85	-	T	C	GAGGAGGCTGAGCGGCAGTTCAACCAGAGAAGAAGAGGAGGAGGAGGAGGAAGGTGGAGGAAGAAGAAGAAGAAGGAGAAGAGGANNNNNNNNNNNNNNNNAGCAGCGACCTCAGACTTGCGGGTGGATCTGCTGCCGTCGGACCCGCTGCTGCACGTCTTGTCCTTCCTGAGCTTCAGGGACCTGG	355:85:-
smaw_01_448034	C01	448034	60	-	C	T	TGACCCTCTGTGACCCCGAGGAGGTCTTCAATCACCTGGACAGGACCCGCCTTGTCTCCGCAGCAACAGTGAGCGAGGTCGTCCANNNNNNNNNNNNNNNNNNNNNNNNNNNNNNNNNNNNNNNNNNNNNNNNNNNNNNNNNNNNNNNNNNNACTCACACAAAGTTATTTCAGCCATCTGTCACATCATGTGAGCAGACTGCAATGGATTGTGGGATATGTAGGACTGAAGTGTTCTGTCTCTCAGCAGCCGGACGAGGAGGCGGACGAGTGGCGTTCAGCTCTGCTCACTCTGACTGACAAAGTAACGAAGAGCCCGGCGGACCA	368:60:-
smaw_01_453875	C01	453875	189	-	C	T	TGGTGGGGGAGCTGCTGAAAGAGCTGTCCCAGGGCCAGGCGGGGGAGCGGGGCCCCGAGGAGCGGCGGGGGACCCTGCTGGAGCTNNNNNNNNNNNNNNNNNNNNNNNNNNNNNNNNTGTGGGAGGAGCACTTCAAGACGCTGCTGCTGCTGCTGCTGGAGACGCTCGGAGACAAAGACGTAAGAACAGAACACTCCTTCTCT	374:189:-
smaw_01_459561	C01	459561	70	-	C	T	GGGCGACGCCGCACGTCAGCCTGCTCTTCTGTCACCAGGAATATTTGCATCTGCCAAAGTTTTGTCAACGTGATCTTTAATTTGCNNNNNNNNNNNNNNNNNNNNNNNNNNNNNNNNNNNNNNNNNNNNNNNNNTATTTGACATATTTGATATTTCATTTTGTTGATTTTACAGTTTGCTGGCTGCTTAGTGCTTAGATTTGAACATCTTTTACTTTCTCATAATTTTCTCTCGTCTTCACCTGCTGACGTGCGTTTGACTTTCCCTCCTTCAGACCGACTCGCCCATCAGGCTCGGATCTCGGCCTCCGTCAATGCCATGA	386:70:-
smaw_01_462984	C01	462984	78	+	C	T	ATTAATAACTTTTAAAAAGGAGAACTGAAATGTCACATATTCTCTCCAGAGATACAAACATTTCCCACACAGATATACAGGAGGANNNNNNNNNNNNNNNNNNNNNNNNNNNNNNNNNNNNNNNNNNNNNNNNNNNNNNNNNNNNNNNNNNNNNGAGGCGGGCAGTGACATCACACAGTCGCCGCTCTTCAGGTGAGCAAGCAGAGCCTTCTGATAGGACGACTCCAGGCCCTGAAACAGA	394:78:+
smaw_01_468020	C01	468020	198	+	T	C	GAGGAACGTTCCCAGAGTCATCGGGCTTTGTTCCCGACGTTCCCACCAGACTTCAGTCATGTCAGAGTGTGGAGTTACAGAGGCTNNNNNNNNNNNNNNNNNNNNNNNNNNNNNNNNNNNNNNNNNNNNNNNNNNNNNNNNNNNNNNNNGTTGGTTGAGGAATCTCTAGGATTCCTCAAAAGAAATTTGTACTTTTTTATTTAGAAGATCAGACGTTGATTCATTTTAATTTTTTTATTTAGATTTACGCGTTTTGGTTCATAATANNNNNNNNNNNNNNNNNNNNNNNNNNNNNNNNNNNNNNCCTACGACAAGCCGTCGTTCTCCTCTTTATTTGTCCGTCGCTTGTTGCTGACTTTGTCTTTTAGGAGTCTGTCGCTCTCACTTCC	398:198:+
smaw_01_470128	C01	470128	291	-	C	T	TGCGGACAGATAACCATTCATTGATCTGCTGAACATCTCCACACATAAACACAGTTTCTACATTAGAATCAGGCCTCTGAATATTNNNNNNNNNNNNNNNNNNNNNNNNNNNNNNNNNNNNNNNNNNNNNNNNNNNNNNNNNNNNNNNNNNNNNNNNNNNNNNNNNNNNNNNNNNNNNNNNNNNNNNNNNNNNNNNNNNNNNNNNNNNNNNNNNNNGCTCATCTGTTTCTTCTTCTTCTTCTCTGGGTCCAGACTCAACGTCATTTTCAGCAAGTTCGACGAGGTTCAGCGGTCGGGGAACATGGTGCTGTCACCGGTGTCAGGTAAGGTCACGACCTC	400:291:-
smaw_01_495409	C01	495409	255	-	C	T	GTTTGGATGTTTTACATAACTCTGCATAAAGTCCCACAGTACTTTGTGAACTTGTTGGTGTCAACGGATCAGAACCTCTGAGATANNNNNNNNNNNNNNNNNNNNNNNNNNNNNNNNNNNNNNNNNNNNNNNNNNNNNNNNNNNNNNNNNNNNNNNNNNNNNNNNNNNNNNNNNNNNNCAAAGGGTCTTAAGCATTCCACACTTCCACTGGAGCACAGAGAGAAGAGGGGGATTAGCGAGGGTCTGGGGAGGTAGCTGCTATCCGC	428:255:-
smaw_01_496380	C01	496380	277	+	A	T	CCTCCCAGTGGCAGTTGGTTTCGTAAACGGCCTCGGGCTCCTGTTTGCAGTCGTCGCGGTCCACCTCGTCCTTCAGGTCCAACGANNNNNNNNNNNNNNNNNNNNNNNNNNNNNNNNNNNNNNNNNNNNNNNNNNNNNNNNNNNNNNNNNNNNNNNNNNNNNNNNNNNNNNNNNNNNNNNNNNNNNNNNNNNNNNNNNNNNNNNNNNNNNNNNNNNNNNGCCTCAGATCCAGCTGTTAGGAATCATGTGTTTTACCTCCTGAACACCAGGGACGGTAAATTACAGAGCGACGCTCACACGGTTT	431:277:+
smaw_01_501139	C01	501139	136	-	A	T	ACAGGTCGTAAGCCCCGCCCCCTGGTGTCCCCTGCTGATGTGCCCTTGAGCAGGACGAGGCTCTCAACCCCGAGTCTTTGCCAGANNNNNNNNNNNNNNNNGACATCTGCCCACATGTGGCGACCTCCATTAAAATTCAGACATAACTAATCAATCTTCCCACAATAATTCCCCATAATTACTTCANNNNNNNNNNNNNNNNNNNNNNNNNNNNNNNNNNNNNNNNNNNNNNNNNNNNNNNNNNNNNNNNNNNNNNNNNNTGCGAGGGAAGTGTATGCAGAGCGATGTGATCGATCCTCGGCTCTGGAATGTAAATTCACACTCGTCTACCTGCGAGAACTTAAC	437:136:-
smaw_01_516517	C01	516517	11	+	A	G	GCCTGATGGAACATCAACTTTAGAAGTTCTGCTGTAATTCAGTCGGAAACAAATTCACCTCAAGGTCCATCGACGAACGAGTTTTNNNNNNNNNNNNNNNNNNNNNNNNNNNNNNNNNNNNNNNNNNNNNNNNNNNNNNNNNNNNNNNNNNNNNNNNNNNNNNNNNNNNNNNNNNNNNNNNNNNNNNNNNNNNNNNNNNNNNNNNNNNNNNNNNNNNNNNNNNNNNNNNNNNNNNNNNNGTCAAACGATTAATTCTCCTGTTTATAAAAGCTCGCTCGGACCTGGATGAGCTGCTGCTGCTCGCGTCCTGGTGCCAGACATTGA	455:11:+
smaw_01_520007	C01	520007	180	-	G	A	GATTTAACTCTTCATTCCACACGACATCTTAACCTCAGTGAAGTGATCTGGCCTCATGGGGGCGCCGCGGAGGTGAAGGGGAGGCNNNNNNNNNNNNNNNNNNNNNNNNNNNNNNNNNNNNNNNNNNNACTATTTTAATATCTTTTAACACGCAGACTGAACGATGTTCAAGCAACAAGCGCGTCGTGTTTCCATCAGTGCTGATTGGAGCAG	459:180:-
smaw_01_525599	C01	525599	165	-	A	C	TTCAAGTCGTCACGTCTGAACTGATTTGATCCTTTTTAACGACAAACATTCAAATATTTTTTTAAAAGTCGTGAACGTTTGTTTTNNNNNNNNNNNNNNNNNNNNNNNNNNNNNNNNNNNNNNNNNNNNNNNNNNNNNNNNNNNTCATCGCCTCTGAGATCTGGTCCGAGAGGAGACGGACACCGAGGCAACGGCGACGGTCTGACCACTCATGTGCAACTGATCTGATCTGTGCAACGAGCCGGCCTG	461:165:-
smaw_01_557303	C01	557303	79	+	A	C	AGCAGGGCAGCTTCCGCTCTTTGTCGCTGGTTGAGGGGGGCGGGGGGCTCACGGGAGGCTGAGGGCCCCACAGCTAACACCCCCCNNNNNNNNNNNNNNNNNNNNNNNNNNNNNNNNNNNNNNNNNNNNNNNNNNNNNNNNNNNNNNNNNNNNNNNNNNNNNNNNNNNNNNNNNNNNNNNNNNNNNNNNNNNNNNNNNNNNNNNNNNNNNNNNNNNNNNNNNNNNNNNNNNNNNNNNNNNNNNNNNNNNNNNNNNNNNNNNNNNNNNNNNTCGGTGGTGAAACTTCTCTTCTCTGTGTCTCAATGCTCGTGACGTCAGAGTCGTTCATGTTGCAAGAACACCACTGACTGAGAGATGAGCAGCTTCACCGGAGGAACTGGAAACTTTTCAAACTCCCTT…	481:79:+
smaw_01_563938	C01	563938	19	-	G	T	CAGACACCAGGGGGCGATCAGGAGGATAAGAAATCACAAGTTCTTATTTACTTTTGATAATATTCAACCACTTGTCAACGGTCAANNNNNNNNNNNNNNNNNNNNNNNNNNNNNNNNNNNNNNNNNNNNNNNNNNNNNNNNNNNNACACACTGGACGCTCTTATCTGATGCACACACACCTCGTCTGGGCTTTAAAAGCGCTCAGCAAACACACACTCACACTCGGAGAGANNNNNNNNNNNNNNNNNNNNNNNNNNNNNNNNNNNNNNCGAGGTCGCGGGGTCAAGCAGAGGCGGCGTGGGCTGGAAACGGTCCAGAGATCTGCGGCGATAACCGCCCCCGCCCCCCGACAAG	492:19:-
smaw_01_572984	C01	572984	49	+	C	T	AGCCAAAGTTTAAACTGATTTTAAGTTTGAATTGTGATTTCTAGAATCCGAGCCGTTACTCCTGGTTTGGTTCGGTCTGCACAGANNNNNNNNNNNNNNNNNNNNNNNNNNNNNNNNNNNNNNNNNNNNNNNNNNNNNNNNNNNNNNNNNNNNCTTGATAGATGATTACTCCCTGATAAGATTTTAATGGCTTAATGTTGTGGCTATTAATCTGGTAAGAAGCGTCTTTGTGCTGATTTGATCAGCTGGACCGGTTTAATTAATCCCCCCGGGGCGTCGCCCTGCAGCCATATGACC	506:49:+
smaw_01_588807	C01	588807	307	-	C	T	AGAGACGTTCCTCACGTTTCTACATCGGTAGTTTTTCTTACTTCATGTCTCTAAAGTCTGTACAACCTCAACTTCAAGGTTGTATNNNNNNNNNNNNNNNNNNNNNNNNNNNNNNNNNNNNNNNNNNNNNNNNNNNNNNNNNNNNNNNNNNNNNNNNNNNNNNNNNNNNNNNNNNNNNNNNNNNNNNNNNCATGAAGCGCTGACGGACGTGAGCCGTCATCATCATGGGGGCGTTTGTTTTGTTGTGCGAGTGTCTGCGTGTTTACTTACTGACCCCAGGACTGTGGTCGACCACTGCTCTGCTCCGAGCAG	525:307:-
smaw_01_597610	C01	597610	7	+	C	T	AGCTCTCAGCCATAAATTGCGTCCAGACTTGGAAAAGTCCTGCGAGTCGCAGCGACGTCCAGCTGATAGAGGCTCAACTTTACATNNNNNNNNNNNNNNNNNNNNNNNNNNNNNNNNNNNNNNNNNNNNNNNNNNNNNNNNNNNNNNNNNNNNNNNNNNCAGCGCTGAAAGAAATGGGCAGCGCTCGCTTCTCGCTCTTTGAAAATTAAGCTGCCGCAGCACGCCCATCGGCCCATTGTCCCGCCGAGCCAGGAGCCAGGCGCTTGGTATTCCCGACACAGAGTGGCTCTAAACTTTGGCCTTCGCTGTGNNNNNNNNNNNNNNNNNNNNNNNNNNNNNNNNTTCTCTCCCTCGCCTTTCCAACTCAATCTTGCGCCGTGCCCTCGCCGCTCGCCCCCT…	540:7:+
smaw_01_632769	C01	632769	43	+	G	A	AGCGTCTCTTTTGTCTCCTGCTGTGACCCACAGTCAGTGAACGCACCACGTGACCCAGTTAGGCCTCAGCCTGAGTGTTTGTTCANNNNNNNNNNNNNNNNNNNNNNNTCTCCACATAATGTTCACTCTCAGGTTTCAGACGCCGACTCTGATGAGGCTCCAGGCTCATTCAGGCCCGACGTGGGAATGGAGC	570:43:+
smaw_01_633406	C01	633406	190	-	G	A	AGAACAAACGGCCGAGAGGAGGAAAAATATATATATAAATAAATATGAATTAGTACACGAGCACTTTACAGAGAGAACATCGTGTNNNNNNNNNNNNNNNNNNNNNNNNNNNNNNNNNNNNNNGGCGGGGCTTATGAACAAAAGGTGCAGAGATGTCAGTGTAATGTCTCGGGACAGAGCGGCGAGCAGCGGTGGTCGTTATGTAATGACCATCGATGT	571:190:-
smaw_01_635675	C01	635675	320	-	C	G	TGGACGCCACAGCTGCCGAGAGCCCGACACAGATCAGAGTCTGACAAACAGAAAACATGCAGCTTGGATCTCACCATGGTAAAGANNNNNNNNNNNNNNNNNNNNNNNNNNNNNNCCTTTGTCCAGATCCACACCAACCCTTCATGGATTCTTTCTCACTCCGTGTCCCATCCTTCCACCAAGTTCACTGGTAATCTGTGNNNNNNNNNNNNNNNNNNNNATAAACCTCTTTGGCGGAGGTCGCGAGGTCGGGACATGATGGAGGCTGGGAACGCCGTCAGCTTCCTGCTCTTGGATCTTCTCTCTCACACAGTCGTCCGTTCGGCTCAAGAATTTGAGAA	575:320:-
smaw_01_636168	C01	636168	58	+	A	G	TTCCTGCTGCTCAACAATACACTGGCACTTCAGTGTGTCGCTGTAGAGACGACGATCAGAGCGTGAGATGTGTGTGTTCATCCCTNNNNNNNNNNNNNNNNNNNNNNNNGTCACTTCCTGCCCCACGATCTCCTCTCTCGGTCTGAAGATCGTCGCTGTGATTCTGTGATTCTCGCTGTGTTTCCGAGGCGTGCNNNNNNNNNNNNNNNNNNNNNNNNNNNNNNNNNNNNNNNNNNNNNNNNNNNNNNNNNNNNNNNNNNNNNNNNNNNNNNNNNNACCAGCGCCTGCTCCGCCTGATGAGACCCTCTCCCCGTGTCAGTGAACGTCTACGTGCTCCCCAGCCAAGCTGACAACCACGAAG	578:58:+
smaw_01_636512	C01	636512	288	-	G	A	GTCAACAGTTTAATCTAAAAAGCAGAAATGTTCAGATGTATCATCCAAAACAAAACCATAACACCACTTATGATCTAGTTCCTGANNNNNNNNNNNNNNNNNNNNNNNTCAGACCAAATGTTGATAAAAGTGAGCGGTGTCGTCCAGAGCTAAAGGTCAAAGGTCCGAGCGCCGTCCTCCAGATGGCGAGGAGNNNNNNNNNNNNNNNNNNNNNNTTGATTTTCTGTTTGAAGGACAGATGGACGACCCCTCTCTGTCTCTCTGTCTCTCTGTTGCAGCCATCATGGCGACGTGTTTGAGNNNNNNNNNNNNNNNNNNNNNNNNNNNNNNNNNNNNNNNNNNNNNNNNNNNNNNNNNNNNNNNNNNNNNNNNNNNNNNNNNNGAGGGTCTCATCAGGCG…	579:288:-
smaw_01_661843	C01	661843	83	+	G	A	CGCCTGCGCTCACACCAGCCGCTCCGCAAACGAGCCCGAGTCAGGAAGTCACTGTGAACGTTCTGCCGCCGCCGCCGCCGCTGCGNNNNNNNNNNNNNNNNNNNNNNNNNNNNNNNNNNNNNNNNNNNNNNNNNNNNNNNNNNNNNNNNNNNNNNNNNNNNNNNNNNNNNNNNNNNNNNNNNNNNNNNNNNNNNNNNNNNNNNNNNNNNNNNNNNNNNNNNNNNNNNNCGTCCTCCTGTTGATCTTGATGAAGTTTGTTTGACTGCATGTATTAACTGTGGCTGCATCTTGTTTTTGTTTTGCTTTTTGTTTCCTCTCTTT	603:83:+
smaw_01_680153	C01	680153	2	+	G	A	CGAACAACAAACAGAGAGGAGTGAAACATCATCTCCCTGAAGGAGATGAGATGTGAGCAGTGACCTGGAACTGGATCAGGACGTTNNNNNNNNNNNNNNNNNNNNNNNNNNNNNNAGTTAAAAACCTCACACAGTCATTTTTGGGGGAACGTGACCTTCTCCTTCACCCCGTCGTTCACTGCGACGCTGCGTTAATGGAACGNNNNNNNNNNNNNNNNNNNNNNNNNNNCTCCTCTTCCTGTGAGGAGCTGACGGGTGTCGTGGTTGTAATTGCCTCTCGCGGGAGGTTGGGTGGTTGTGACAAGTCTGCTCGT	613:2:+
smaw_01_686905	C01	686905	193	-	C	T	TGCAAGCCGCTCGCAGAAAAACCTGAAAGCTTTCTGGTGCTGGAGGGGGTTTGTGTGTGTTTGTGTGTGTGTGTGTGTGTGTGTGNNNNNNNNNNNNNNNNNNNNNNNNNNNNNNNNNNNNNNNNNNNNNNNNNNNNNNNNNNACGTGTGCAGCGCAGAGTGAGGGAGCGTCTCGGGCGTGGGGCTCCACAGGGAAACGAACCCCCGACCCCCACGACTGCGGTGGTG	622:193:-
smaw_01_698334	C01	698334	3	+	A	G	AAAACCAAAACAAGAGGCTGAAAGAGGCTGAAAGTCTGTAATCTTACTGTCGCTCTTTGTGACGCCGAGCGACTCCACCTTCACANNNNNNNNNNNNNNNATATAATATATGGTGATCGTCGCTCAGGGTAACTCTGGGCGGGGGGAGTGGTTCAGCCTAATGCCCCCTCATTTTATTCATTAGC	628:3:+
smaw_01_699268	C01	699268	224	+	A	G	TGAAGACGTCGAGGTTGAAGCTCAGGACAGATTTTAGACCTGATCCAGATTCACCGAGACTCTATAACCAAGTCCAGTTTCTCCTNNNNNNNNNNNNNNNNNNNNNNNNNNNNNNNNNNNNNNNNNNNNNNNNNNNNNNNNNNNNNNNNNNNNNNNNNNNNNNNNNNNNNNNNNNNNNNNNNNNNNNNNNNNNNNNNNNNNCTCATCAGCAGCCTGAAGCAGCAGCGAGATGGAAATGATCCTCCGTCGTCTTCAGCAAAGGAAACGTTGGTCAGTAAAGGTGTTTCCATTCTCTTCATCCCGGGAGTGGA	631:224:+
smaw_01_700390	C01	700390	305	-	G	A	CTCGCCAGGATCTGGCTCTCGATCACCTGGACCCAGGCGTCTCGCTCCTCGTACGTCGTGGCCTCGAAGTGCCATGTCTGCCCCGNNNNNNNNNNNNNNNNNNNNNNNNNNNNNNNNNNNNNNNNNNNNNNNNNNNNNNNNNNNNNNNNNNNNNNNNNNNNNNNNNNNNNNNNNNNNNNNNNNNNNNNNNNNNNNNNNNNNNNNNNNNNNNNNNNNNNNNNNNNNNNNGACACCTGTTCTCCTGAACCAACCACTGCTGACCTACATGACCCCGCCCCCTGAAGCCAGGATGTCACGCAAATTACAGGGGCCCTGAGTC	632:305:-
smaw_01_732137	C01	732137	253	-	T	G	ATCCCTGTCCTTTCAGACGCACACACTTCTGAGCTTTGACCTTTGACCCCTGTACATGCTCTCATCAGGATCTGATGTACGATCTNNNNNNNNNNNNNNNNNNNNNNNNNNNNNNNNNNNNNNNNNNNNNNNNNNNNNNNNNNNNNNNNNNNNNNNNNNNNNNNNNNNNNNNNNNNNNNNNNNNNNNNNNNNNNNNNNNNNNNNNNNNNNNAAGCGCGTCAGAGTTGAAGTCTCCCACATGGAGACAGGAAGACGTCGTCCTCCTGATCCATCCTGCTTTGATTGGAGACGGGAGACGAGGCAGCG	658:253:-
smaw_01_769102	C01	769102	5	+	C	G	TCCACGTCCTCCTCCTGCTGCCGACGGCTCCACAACAACACCTCTACCAGTCGCGTCTCACGTAAAGACCAAGCTAACGTTAGCTNNNNNNNNNNCCGCCGCGGCGTCTTTAGCTTGGAAAAAAAACAGCCTTTTCCCCACTAGCTAACAAACTGCATTCAACGATCACAACACACAACGNNNNNATACGATTCGTCTTCGTTCTGGTCTTCAATTTCTCTGATTTTACTCAAAATGAAATCCTGAAAAATCTGTTCTATGTTGGCCGCCATGTTTCGGCGTGCGTCTCCCTTTCAGGTCCGGGTGGAACCCGTGTCCTCT	671:5:+
smaw_01_775193	C01	775193	202	-	C	T	CTGTTTGAAGATGAAGTCATGTCTTACGTGCCTCCTCACGCCTTACTTCACCCCAGCTACTGTCAGTCACCTCGGGGATCCCCCGNNNNNNNNNNNNNNNNNNNNNNNNNNNNNNNNNNNNNNNNNNNNNNNNNNNNNNNNNNNNNNNNNNNNNNNNNNNNNNNNNNNNNNNNNNNNNNNNNNAGTAGGAACAAACGGACCGTCACAGATCGCCGACACATGCCACAACACTTCTCTTGGCTGTCTTGCCTCCAGGAACTCAGAGAGCGAACGCCAGAGCTCCGGCCCCCTACAAAAGAGACTTTGAGGCCAAACT	674:202:-
smaw_01_811451	C01	811451	133	-	G	A	GAGCGTCCAGAAGATACTGTACATGTGCTAATTCATCTGGATTGACGCTCGTGTCATCCGTGAACTGACTTATTCACCAAAACGTNNNNNNNNNNNNNNNNNNNNNNNNNNNNNNNNNNNNNNNNNNGCTCCCGAACAAACCGCCGCTGAGGGACAAGAAGCAGTCGGATCAATTACTCCAGCGGTCCATCAGCCGCTGATCAATCGCTCGTCGAATCAGNNNNNNNNNNNNNNNNNNNNNNNNNNNNNNNNNNNNNNNNNNNNNNNNNNNNNNNNNNNNNNNNNNNNNNNNNNNNNNNNNNGAGGCTGACACCACTCAGCGCTGCCTCGGGCTACGACACACACACACACACACACACACGCTGACGGACACACACACGCTGAGTC	711:133:-
smaw_01_833458	C01	833458	350	-	C	G	GTCGGTGGACAGCCCCTTCGAGCAGGGCGTCTCCCCCAACAACGTGCCCTACTACATCAAGTGAGTACGAGCTGGAGACCCTACANNNNNNNNNNNNNNNNNNNNNNNNNNNNNNNNNNNNNNNNNNNNNNNNNNNNNNNNNNNNNNNNNNNNNNNNNNNNNNNNNNNNNNNNNNNNNNAGGGAGCTTTGCGTTGCCAGGGAAGCTCCTTATGGCAACACACACCAGACAACTGGATAAAGAACAGTCCTGTGAAGATGCTTTCNNNNATGCACCGACGCTCCTTCTCCTCAACTACTTCCACTTGATGCTGTGCAGCAGTATTATGGGCTGTATTTGTAAAAGCAAATGTCT	729:350:-
smaw_01_833933	C01	833933	39	+	A	C	ATCAGCATCCTGTAGGTCCCAGAAACAACAACAACAACAACCCATGCCCCGTCCAGGAAATGTGCAGTATCGCATGTAATAAAAANNNNNNNNNNNNNNNNNNNNNNNNNNNNNNNNNNNNNNNNNNNNNNNNNNNNNNNNNNNNNNNNNNNNNACTTATTATGCCCACAAGAGTTGGCACACCAAGTATTAACGGGGACCTGCGCTTTCTGGGAATTGTCAGCACAGTTGGAGCCAAT	731:39:+
smaw_01_839994	C01	839994	240	-	G	A	TTTAACTACACAACAAATACAATAACAAACGACACGTTGACAGAAACACGTCGTCTTCGCTGTGAAAGTCTCACACGTGATCAGANNNNNNNNNNNNNNNNNNNNNNNNNNNNNNNNNNNNNNNNNNNNNNNNNNNNNNNNNNNNNNNNNNNNNNNNTCTCACAGGGCTTCAGGAGAGACCTGAGAGCGAAGGAGCCAGTTGTGACCAAGAGTCTGGACGATGTCGGGGTCTTTCTGTCCGAACTGCCCCGAGACTCGCCGGCGTTTGAGCAGCGAGGTACACGGACA	738:240:-
smaw_01_840802	C01	840802	59	+	G	A	ATCACCGTTGTCTTTATGCATGAAATGTCCAAATCATCCGAGCCAATCTCCTCCCTTCGTTTGCATAAAATTTTGTGCATAAAATNNNNNNNNNNNNNNNNNNNNNNNNNNNNNNNNNNNNNNNNNNNNNNNNNNNNNNNNNNNNNNNNNNNNNNNNNNNNNNNNNNNNNNNNNAGGATCGAGGACGGCAACGTCGACGGCCGCACACTGCAATGAAACCACAGGGCTTTTTATTACAGATATACGTGACTTGTATTTGCTACGAATTCCGACGACTTCCCAAAACTGCCCGGAGACAGACACTGTGTCTGTGTGCGTCCCG	740:59:+
smaw_01_846753	C01	846753	25	+	G	A	CAGTCCTGCAAAAAACACACAATCGTCATTTCTTCTTCATTTAGCGGTTAAATAAATCAGTGCTTATTATGCACAGGTTTTAAACNNNNNNNNNNNNNNNNNNNNNNNNNNNNNNNNNNNNNNNNNNNNNNNNNNNNNNNNNNNNNNNNNNNNNNNNNNNNNNNNNNNNNNNNNNNNNACCACCACCCGCTTGTTCTGCACCATGTTGTCCAGCATGGTCAGCCAATCAGTGAGCTCGGCCCAGGACTTGTTGAACTGAGCCA	752:25:+
smaw_01_848252	C01	848252	197	-	G	C	TCGAGGGTCTGCTGAGGGAGCTGGAGAAGCTTCAGGCCCAGCTGGACGACCTGTCGGCCTGGGCGTCCAGCACCAGAGCCAGGCTNNNNNNNNNNNNNNNNNNNNNNNNNNNNNNNNNNNNNNNNNNNNNNNNNNNNNNNNNNNNNCGACCCAGTTCTGCTTCCACAAAGCACATGCTTTGCCCTAATGTCTCTCTCTTTGCAGATCATCGACGAAGTGCAAGTGAAACAACCAGAAGTGGAGGCGGTTCTGGTGCGAGCTGATCAGCTGTACAAG	753:197:-
smaw_01_848630	C01	848630	288	-	T	A	CGGCCGAGCCGCAGCACATCAGACACACTCTGGGCAAAGTGCAGGTACCTGTGTGTGTCTGTGAGTGGGATGGATCAGCCGAGAANNNNNNNNNNNNNNNNNNNNNNNNNNNNNNNNNNNNNNNNNNNNNNNNNNNNNNNNNNNNNNNNNNNNNNNNNNNNNNNNNNNNNNNNNNNNNNNNNNNNNNNNNNNNNNNNNNNNNNNNNNNNNNNNNNNNNNNNNNNNNNNNNNNNNNNNNNNNNNNNNNNNNNNCAGGAGCAAACGCATAACGCTTCCCGCCGACAAACAGAAAGACGTCAGGACGGTCAACGCTCGCTGGGCTCAGGTGAACACGGCANNNNNNNNNNNNNNNNCGTCTTTTGACGGATTGTCGTCTTCGCTCATCAGAACTATTTACTT…	756:288:-
smaw_01_850366	C01	850366	243	-	T	A	GTTTTACAACCTGCCTCAGCAAGAGCACTGCCTGAAGGTCAGCGACGCTGTAGTGTTCCTGTCGGAATAGAAACGCCACAGACAANNNNNNNNNNNNNNNNNNNNNNNNNNNNNNNNNNNNNNNNNNNNNNNNNNNNNNNNNNNNNNNNNNNNNNNNNNNNNNNNNNNNNNNNNNNNNNNNNNNNNNNNNNNNNNNNNNNNNNNNNNNNNNNNNNNNNNNNNNNNNNNNNNNNNNNNNNTATAATTCATATTTGTCACAATCTCCTCCCTCTGCCTCCTCCACCATCACCTTCACACGCACAGGAGGTGAAGGGGAGCGTTGAC	758:243:-
smaw_01_933069	C01	933069	335	-	G	T	GATTTATTTATCGTTGAGACAATGTGAGGGGGTTGTTGGAAAACCGAAGAGGGAGTGTGCCGAGATGGAAGACCGCCTCCGCACCNNNNNNNNNNNNNNNNNNNNNNNNNNNNNNNNNNNNNNNNNNNNNNNNNNNNNNNNNNNNNNNNNNNNNNNNNNNNNNNNNNNNNNNNNNNNNNNNNNNNNNNNNNNNNNNNNNNNNNNNNNNNNNNNNNNNNNNNNNNNNNNNNNNNNNNNNNNNNNNNNNNNNNNNNNNNNCCCCCAAAAAAGGGCTGAACCTTAACAGTACTGCATCCGCCCGCCTGCGCTGCCTGTCTTCTGTTCTTCTCTTCACCGAGGTCAG	820:335:-
smaw_01_949777	C01	949777	48	+	C	T	CTGGACGACTACAACACGGCCTGTAATTCGGAGAGAGAAAGTTTCTCCGTCTTCTCTACAAGCGTTTCTCATGGCCACAGGGGAGNNNNNNNNNNNNNNNNNNNNNNNNNNNNNNNNNNNNNNNNNNNNNNNNNNNNTGATGGGAACCGACGCCTAATCTGCTCTAACGTTCGGGCAGTCGCTGGTTGCGTCAGCGAAAATGCAGAGACTGTAAATAGAAATTAGGGAGAAGATACGANNNNNNNNNNNNNNGGTCGGCGGGTGGGTGTTGAAATTGGAGGCGCAGTTGCAGCACTGATCCACCAAGACGCCCTGCAGCCTCCAACTGAAGAGGAGG	829:48:+
smaw_01_973892	C01	973892	230	-	T	C	CACATTGTTCAATCATCCTTTACACTGAACCCAGCTGGGTCGATTAGTGCCTAAATGTATGCATCAAATATTTTCTTGGAAGTTANNNNNNNNNNNNNNNNNNNNNNNNNNNAACTGATGTGCCGTACGTGGGCGTTGGATGGACGGTTGTTCCGTGAGCGGCGGCAGCGGCGAGGGATCCTCAACGTGGCGATCGCCCTCCACCTCCTCCGTCTGACAGGTGAGAGTTACAGTGACTA	848:230:-
smaw_01_984511	C01	984511	75	+	C	G	CAAGATGGACGACAAACACACAATCACACAAATATATCTTGAACGTCTTTTAACATTTCAAAATTATTATTATTCACCAGCTTTTNNNNNNNNNNNNNNNNNNNNNNNNNNNNNNNNNNNNNNNNNNNNNNNNNNNNNNNNNNNNNNNNNNNNNNNNNNNNNNNNNNNNNNNNNNNNNNNNNNNNNNNNNNNNNNNNNNNTGAGAGCCAGTGGTGCCGCTTGGGTCTTCGTCTGATACGTGAAGAAGTACACACAGTGTCATGTCACACGAACACAACAAGAACTAAATGAGTGACAACGTGTCCGAGGAGCGCCCGTGACCTGTGAGTGTGANNCTGAGCGAGGCCGGGAACTCGGTGGGGTTTTTGAAGGGAATGGCGACGGAGGCGTTGGAGCCGA…	861:75:+
smaw_01_990025	C01	990025	291	+	G	A	ATGGTCCCAGGGTTTATGCGTGTCCTCTTTTACAGGCATTTTAACCGTACTAGGTAAAGTGAAGTATCGTGGCAGAGAAACCTCANNNNNNNNNNNNNNNNNNNNNNNNNNNNNNNNNNNNNNNNNNNNNNNNNNNNNNNNNNNNNNNNNNNNNNNNNNNNNNNNNNNNNNNNNNNNNNNNNNNNNNNNNNNNNNNNNNNNNNNNNNACGGTGCCTCCTTGCCCTGTGTACCTTTTGTTGGAGCTTGCGTATGGCTGTGTTCGTCCTCACAGTGCTGCTGTACAAAGTGTGTGTGAGCGAGCGCCTCCGGCGT	864:291:+
smaw_01_990089	C01	990089	154	-	T	C	GTAGTTATGGTGAGTTATGGATCAAATAATATGCCCACTGATGTTTTGTTTTGATTTAGCCGTGTGTGCATCAGCACTGAGCCTTNNNNNNNNNNNNNNNNAGGTGTGTGAGGAGTTAGTGCGTATGCCGCTGATCAACGCGAGCTGGGAGCGAGCGCTCGCTATCTGGGGTCAGCAGAGCATGAA	865:154:-
smaw_01_995069	C01	995069	244	+	G	T	GAGCACCAGTGCTTAAACTCCTGCATGTCCAGTAAGTACTCTGGTTTGATGTGCCACAGACAAGCTCCCTGCACCCTGAACACACNNNNNNNNNNNNNNNNNNNNNNNNNNNNNNNNNNNNNNNNNNNNNNNNNNNNNNNNNNNNNNNNNNNNNNNNNNNNNNNNNNNNNNNNNNNNNNNNNNNNNNNNNNNNNNNNNNNNNNNNNNNNNNNNNNNNNNNNNNNNNTTGACCTGTGTGTCTGTGTGCACCTGAAAAAGGCGAGCATCGCTTTATGCTGCTGTAACAGCTCCGCGGTGCGTTTGTCTATATCTGTGGAAAACGACCCG	872:244:+
smaw_01_1011793	C01	1011793	5	+	G	A	TAACGTGTGAGAATGGGAATATTCATCAGCATTATTAGCATTAGCAATGTGAAATGATGCATAACACTGTGTGAGACACGGCAAANNNNNNNNNNNNNNNNNNNNNNNNNNNNNNNNNNNNNNNNNNNNNNNNNNNNNNNNNNNNNNNNNNNNNNNNNNNNNNNNNNNNNNNNNNNNNNNNNNNNNNNNNNNNNNNNNNGATTAAAGACGGATCGGTTTCATGACATGGTTCTGTTGCAGAGTTCAGCGTCTGTGTCGAGCAGCATCTCATGATTTTTACCTTTTTCCCGTGGTTGCCGGGGGGTCCGTGA	890:5:+
smaw_01_1020367	C01	1020367	69	+	C	A	TAGGTGAACAGCATGATCGAGTGACTTCAGCATCACTAAGTGATAAAAGCAAATGTTTTTCAGGCGGCCACCTTTTCCTTTGCTGNNNNNNNNNNNNNNNNNNNNNNNNNNNNNNNNNNNNNNNNNNNNNNNNNNNNNNNNNNNNNNNNNNNNNNNNNNNNNNNNNNNNNNNNNNNNNNNNNNNNNNTCAGACACCAGTGTGTTAGCGTTAACACGTGAAGGGACATCAGATTATGACGTGTTTTTATTTCTCACAACGTCACAGACTCCCCTGATGACGTTGTCCG	896:69:+
smaw_01_1041708	C01	1041708	31	+	C	T	CGCGTTCGTGCCCGCGACCGCACCAATGTTCATCTTTGCTCCCTCCACCTGCCGCAGGTTGGACTTGCCCGAGCGTCCGAACTTGNNNNNGAGTGAAGATGACGACGACTCCTTCTTCGTGGGCTTGGTGCGCAGGGGCAGACTGGACGGCCTCTTGGGTAGGTTCTGCTGCTTGGGCAGGGGGAAGATGGTGGTGGGCATGGGGGTGGCCTGGTCTGACGTGCCCGACGCTTCGCTCGCCATCTTGATGAGAGGGTAGAGCAGGCTGGAGCTGCCGG	914:31:+
smaw_01_1045800	C01	1045800	263	-	A	G	GTTTCAAAACTGATTGCGCTCAGTGTTTTAACCTTGGGGAGATGCTGAGTTAGCGTTAGTGACTGTCACTTAATCCAGCTGATGCNNNNNNNNNNNNNNNNNNNNNNNNNNNNNNNNNNNNNNNNNNNNNNNNNNNNNNNNNNNNNAATCGCAGCCTTTTTCCTTTAGATAAATAAACATGACATGCGGAGAAAGGAAAAATGTCGACACCGACGGCGGAACTCTTCTATATTAAAAGTGGCTGCGCTTCACAACTGAGCTGTGTTTTCTTTCCAATCCCTCAGCCCTCATAATTTCCCCCGGCCAGCCCGTGAAAGGAGCCATTATGCATCTGAGCCATTAGTCTTATACACATTGTCATGGGA	921:263:-
smaw_01_1059693	C01	1059693	44	+	T	A	CCATTAGACCGCCTGCTTCCTCTCATCATCATCATTACTCGCGTCGTCCCGATAGAACGGGCAGTGGGACGTCCTCTGCTCTGCANNNNNNNNNNNNNNNNNNNNNNNNNNNNCGGACTCCTGTCTCTTTACGCCGACAGAGTCTGACTGCGGCCCCTGAATTAATTTTGCAAAGTACAGTGATTTAGATTTATTGGANNNNNNNNNNNNNNNNNNNNNNNNNNNNNNNNNNNNNNNNNNNNNNNNNNGACTGATTATTGAGCGAGTATGTAAATCCTCTTGCCAGTCACTGTAGTCGTTAAGCCACTCCAGGGGACGACTCATTTGCATGTC	936:44:+
smaw_01_1080861	C01	1080861	38	+	A	C	AGCACTTGACAGAACATTAGTGAAGCTCTCCATGTTCAGTGACCCCAACTTCTGTTTACAGCCCGTCCAACGTTTCTTACCCCGANNNNNNNNNNNNNNNNNNNNNNNNNNNNNNNNNNNNNNNNNNNNNNNNNNNNNNNNNNNNNNNNNNNNNNNNNNNNNNNNNNNNNNNNNNNNNNNNNNNNNNNNNNNNNNNNNNNNNNNNNNNNNNNNNNNNGTCCTAGGTCGAGCCACTTTTCCTTGAGGACAAGAATGTGCTTTACAGATGTTTTGTGTCATGTTTAAAACATTGTGGAATAAAG	961:38:+
smaw_01_1085278	C01	1085278	158	+	A	C	CCCGTGTTCAAAGATGCGTCTGGAACTTTGGACAAAAGTTCTCGCTTCTCGGCTCTGTACCGACAGGACAGCAGCAAGCTGTCGGNNNNNNNNNNNNNNNNNNNNNNNNNNNNNNNNNNNAAGTCAGTTGATTTCCTTCTTTCTCCATTTCTCTTCAAGATATATCACTATAATTTGTTTTTATAATTGCTTGTTTCCATCTCTCTTTTCCCAACAGACCGGAGAAAATGGCTAAACTCCCCGTGCTCTTAGGGAACTTAGACGTTACTATT	967:158:+
smaw_01_1089562	C01	1089562	193	+	T	C	TTCGCGCCACCTCTACAGGAAGGACACACACAAGAGAACAAGGAGTAATAACTTCTTTCGATCTGTGATCTCCGTCTGCGTGTTGNNNNNNNNNNNNNNNNNNNNNNNNNNNNNNNNNNNNCTGCCTCTGTTCGGCCTCCTCCAGGAGAACGTCCACAGACTGGACATGAAGGAGTCGGCGCCTCTCAGCACTCACAGTGTAAGCCTGACACCTAGTGCCG	971:193:+
smaw_01_1139764	C01	1139764	28	-	T	C	AGCAGAAACAGGCATCAACAGCCATCGATATACATGAATATAAACAGCGCGTGCAGCACTCGCTCAGGTTTACCATCATGGGGAANNNNNNNNNNNNNNNNNNNNNNNNNNNNNNNCACAGCAGGACCAGGCAGCTGAGCTGGATGATGGTGAAGAGGTGCACCTTCCTCAGAGGGACGTGGCGAAGGTAGATGAAGTCGG	1043:28:-
smaw_01_1147995	C01	1147995	63	+	A	C	AAGTGACTCATGTGGGTGTAGACGTGTTGATAGGCCGAGCCGCCGAGTCCGTGGTCCTTGTCAGTGTACCACTGGAAGAAGGAAANNNNNNNNNNNNNNNNNNNNNNNNNNNNNNNNNTGTCTTTTATTTATATTTTGATTGACTCACCATTGCTTCAAAGTCCACCTGCTCCTCCACCAGAGCTTCTGAGATCTCAGCTCCCTGCTGGAAATGAACGTTGTCTAGAAAAACACAAACGAAAGCACTGGATTATCCTGACAGTATAATATCCTGATGCTTTGACT	1052:63:+
smaw_01_1179011	C01	1179011	99	+	G	A	ACCATCGGTCCGTCTTTGCTGTAGGAGAAGCTGACCTGGTCGAAGGTCACCAGGCCTTTCCTCGGCCAATCGGGGGGAGGACGCTNNNNNNNNNNNNNGGGTGCCTCACTCTCAAGCTCAGTGTACTCCACTGCTCTCTCCACTGACGTCATCTGGACAGAAAAGGAGCAGCAGCAACAAAGT	1068:99:+
smaw_01_1182761	C01	1182761	67	+	C	T	TGGTGCGTGACCAGGATCCGAGGTTTGTTCTTCAGCAGGCCACAGATGCACCTGAGGTCAAGATCACGTCACTGGTCAGCAGCGGNNNNNNNNNNNNNNNNNNNNNNNNNNNNNNNNNNNNNNNNNNNNNNNNNNNNNNNNNNNNNNNNNNNNNNNNNNNNNNNNNNNNNNNNNNNNNNNNNNNNNNNNNNNNNNNNNNNNNNNNNNNNNNNNNNNNNNNNTGTCTTAGATCTTGTGATATATAAAGAGTCGAGCGTTTGTGACGTTTATATTAAAATTAACGTCCTCTGATCAAAAGTGGGTGGG	1074:67:+
smaw_01_1184890	C01	1184890	120	-	G	T	ACGTCTCCCTCACTCTGGACTCAAACAAGCTGCTGGCTGTCATCGGACCCGTGGGAGCTGGAAAGGTCCGTTGTCACATTTCTTTNTTTCAGGCAGCAACAGTTGTGACATGTTTCTCACGTCTTTCTCCTCCCGTCTGCGTCCGTCCAGTCGTCCCTGCTCAGCTCCATC	1078:120:-
smaw_01_1218345	C01	1218345	140	-	C	T	GCAGGCAGCAGGAGAAGGAGAAGGCGCTGGACGCCGAGCTCAAGAAGAGCAAGAAGGAGGTCCGCGAGTTGCAGTCGCAGCTCGTNNNNNNNNNNNNNNNNNNNNNGAGGACAAGCTAACAACCCTAACTCCCCTGGGGGAGGTATTTGTCACAAGTGCATGGCACGCAGACATCACCCCTCCTCCTCCTCAGGGCTCCTGCTCCGTCATTGTTCCCCCGGATCTATT	1107:140:-
smaw_01_1234020	C01	1234020	37	+	G	A	TTTATCCGACCTGAAAGGCTCTTGCCACTCGGAGCCGTGGCCCCATCGTGACGGACGGTGACGCACATGGCGATGGCAGCAGAGGNNNNNNNNNNNNNNNNNNNNNNNNNNNNNNNNNNNNNNNNNNNNNNNNNNNNNNNNNNNNNNNNNNNNNNNNNNNNNNNNNNNNNNNNNNNNNNNNNNNNNNNNNNNNNNNNNNNNNNNNNNNNNNNNNNNCTTGGTACCTGGAGTCGAGACATAATGGTCGAAGGTCTTTCATCAGTCTGCGGGATGACTCGTCTTATACAAGTCACATATAGCAA	1123:37:+
smaw_01_1237098	C01	1237098	242	-	T	C	GCATACCTTCCAGTGAGCGCACGGCGTCCATCGACGCCTCATTAGCAAACATGCAGTGTCACATCCTCGGCCTCCTCCGCAGAGGNNNNNNNNNNNNNNNNNNNNNNNNNNNNNNNNNNNNNNNNNNNNNNNNNNNNNNNNNNNNNNNNNNNNNNNNNNNNNNNNNNNNNNNNNNNNNTATCACAACATCGGGCTGCGAGTGCAGGCGCTCCCTGAGGACCCGCACATTCGCCCTCTGCTAAAAATAAAACCCTGGTGTCAGGTACTGTACACACACTGTTCCACCCACAAGAAGTGACGAATCAGAACCGGA	1127:242:-
smaw_01_1241119	C01	1241119	208	-	T	C	CGTCATCGTTAGGCTGAAGTAGGAAATGAAATGCACCTTGTGGGTGGCGTTACGTCCAGGATGCTGCAATGATGCTCATCCCATTNNNNNNNNNNNNNNNNNNNNNNNNNNNNNNNNNNNNNNNNNNNNNNNNNNNNNNNNNNNNNNNNNNNNNNNNNNNNNNNNNNNNNNNNNNNNNNNNNNNNNNATGGACTTTGCCTTTCACATATGACGAAGTCAGACGCCTTCACACGAAAGGACGTTTTCCAGAACATTCTATAGCATCTGTGTCGAGCAGCAGGAGGCCGGACATGATGATAACAACACGTCCCCTCGCTC	1129:208:-
smaw_01_1241352	C01	1241352	18	+	C	T	CACAGCTGACGGGGTTTCGGGGAAACGCCAATCTGACAAAAGAAAAATCCTCAGCAATTCATCCAATGAGTGATTTATCTTGACCNNNNNNNNNNNNNNNNNNNNNNNNNNNNNNNNNNNNNNNNNNNNNNNNNNNNNNNNNNNNNNNNNNNNNNNNNNNNNNNNNNNNNNNNNNNNNNNNNNNNNNNNNNNNNNNNNNNNNNNNNNNNNNNNGCACAGGCGATCTGCACATGAGGAGGAGGAGGAGGAGGAGCCGTTTTCCAGGAAGTACAACAAAGGGCTGCTCTGTGAGGCGCTCGTGAGCGTCCATCCGTCCAGCGC	1130:18:+
smaw_01_1245013	C01	1245013	80	+	T	G	ATCCAGTGATGTAAAGAATCTGTCCCTGATGGACTCTTTGGTTCGCAATTGTACGTGCACATGTTCTGGCTTTGCTCCCTTTTTTNNNNNNNNNNNNNNNNNNNNNNNNNNNNNNNNNNNNNNNNNNNNNNNNNNNNNNNNNNNNNNNNNNNNNNNNNNNNNNNNNNNNNNNNNNNNNNNNNNNNNNNNNNNNNNNNNNNNNNNNNNNNNNNNNNNNNNNACACAGATCATGGAACATTGGTATTTCCACCATTAGGACATTGATCACAGGCTCTTCGCTCACAGATTGATCATTTAAAGTTCAA	1139:80:+
smaw_01_1256608	C01	1256608	64	+	C	T	GACAATGCTGTCAGAGCCTCAAATAGCTTCCGTCAAAACGGAGCGTATGACTCGCAGGTTATTCGGAGCGGACGCTGTCACATTCNNNNNNNNNNGTATACTCTTGACGCAGGGCTGATCATCTTTCTAATTTATATTGTTACTTCAGTTTATTCCAGTCGATCATAAGCTGCTGTCAGAAGCACACTGGAGTCTCGTGTGTGGGAATGTAAATGTCCACATGTTCGCTCAGTAGGCCTCAGTTTCTGGAACTTCTCCTGCCAGCCCCCTTGGGGAAAATCTCTAGATCTCCCAGACGCCACTGAACGTTCCAGAGACTTTACTTTTGGTGTGACACCGCC	1151:64:+
smaw_01_1259334	C01	1259334	48	-	G	A	GACGGTTCCCTTGGACCCTCGCTGTGGCTTGGTCCTGGACCAGGGCACGTGTCGGGACTATAACATCCGCTGGTATTACGACAAGNNNNNNNNNGCCTGCGCCCAGTTCTGGTACGGAGGCTGCAACGGCAACAAGAACCGCTTCGACACGGAGGACGAGTGCAAGAGGACGTGTGTGATCGCCAGATCCACCGGTACATGCAACATCCCGTCACATTAATTATATCACTCGTGTCATTCACACATACTCTCTCCGGCTGCTTCCACACAGGCACTGA	1156:48:-
smaw_01_1290293	C01	1290293	14	+	A	T	GAGGAACTTCTCCAACACCCACTCCGCTGCTTCTGCTGCGCTTTTATGACGACCAGGAGCTATGGAGGACAAAGAGTGTCACTGCNNNNNNNNNNNNNNNNNNNNNNNNNNNNNNNNNNNNNNNNNNNNNNNNNNNNNNNNNNNNNNNNNNNNNNNNNNNNNNNNNNNNNNNCATAACTTAAAAAAGGAGAATATTAAAAACTACATCATGCATTCATAATCAAATAATGGAATTTCAAAATCTATTTGATGATGCAG	1191:14:+
smaw_01_1293517	C01	1293517	220	-	A	G	TTCACGGATCCAGTCGGCATGGTGACTCGTCTAAGGAGCAGAGAGGTTTAATCTCAGAACGGCCCAGGTTGTGGAATAATTCAGANNNNNNNNNNNNNNNNNNNNNNNNNNNNNNNNNNNNNNNNNNNNNNNNNNNNNNNNNNNNNNNNNNNNNNNNNNNNNNNNNNNNNNNNNNNNNNNNNNNATTCGGTCGTGGTCGCGGTCGTGGCAGCTCGTCTCTCGCTGTGTGGCTCGGCAGCGGCTTCACGCGCTCTTATTGAGCGGACTGGGGCTTGGCTGGAACCGGGGTCAGAGTGTTTTGTCCTGTCGGAACAGG	1193:220:-
smaw_01_1296590	C01	1296590	27	-	C	T	AAAATGGCGACTTGATCCGCGATGGCGTCGTTGATCTTGTTGATATCGCTGCAATGCAGACACGACGACTGTGAGACGGTGCACANNNNNNNNNNNNNNNNNNNNNNNNNNNNNNNNNNNNNNTGCTCACTCACTCTGACATGCGCGTGTTGAGCTCTCCGACCGACGTGCAGTCGAACCAGCCGATCTCCATCCTCATCACTTTGCTGAAGTACATNNNNNNNNNNNNNNNNNNNNNNNNNNNNNNNNNNNNNNNNNNNNNNNNNNNNNNNNNNNNNNNNNNNNNNNNNNNNNNNNNNNNNNNNNCTCTGACCTCCTTTCGGAGGGGACCCAGAGTCATGTGGCTCTGGTTTTATTCATCAGAACCATAGTTCATGTCTTTGTCACATTG	1196:27:-
smaw_01_1299751	C01	1299751	285	-	C	G	ATCTGGGTGAAGAAGGAGACGACGCCGACCATGACGAAGAACAGGCAGATACCGTTGATCTCCTTCTTCTGAACCTCGGGGTCCGNNNNNNNNNNNNNNNNNNNNNNNNNNNNNTGTCACGTTTCCTACACACAGTGTCTCAAGGGCTTTTGAAAACGTATTTTGAAGAAATTAAGATTGAGCTTTACGGCCAAGATTTGACTGAACAGCAGCGAGTAGACGGGGTTGACGCCTCCGTTGATCGCGGCTCCCACGGTTCCGAAAAGCATATATGGCCACTCGGGGATGTTGTACTTCAGGATCCNNNNNNNNNNNGCCGGCTCCACGACCTCCTCCTCCTCCTCTGGGATGGCATTCTGAACATTCATAGATTATAACAGTGATGATAATAAACCTTATA	1205:285:-
smaw_01_1306546	C01	1306546	360	+	G	C	GAGGTTCCTTCCACCGACACACGTTGGGAGGTGAAGGTAATGCTGCGTGGCAGCGTTTCGGGGCCTCGCCGCTTGTGGCGGAGGGNNNNNNNNNGCCTCTGCCTCCTCTGTTTCACTTACATTAACTAAACCATGAATAAGCAGTTTGATATCGCAACACAGCCGCTTATGAACTGCGTGACGGAATTAAATCGCGGCCCTGACAGGAATATTCGATGCGACGCGCTCGATCCCCGATGCCACGTTCACTAACGTGGCGCCGATGCCGCCGCTCGTGNNNNNNNNNNNNNNNNNNNNNNNNNNNTCAGAGACACTCCATCAGTTAGCAGTAATACGCGATCACGCCACGCTGACCTCAGGGAAATTGAGTCTTTAATCACGACATCTCCA	1210:360:+
smaw_01_1315922	C01	1315922	150	+	C	A	ACATTATGCAGCATCAAGAAATGTGCCTCCAGTCTTCACATCTTTCTAGACTTCACCACCGAACCAAGGTCGACTGTGTCCTCGCNGCGTTACATTCCCACTCGGCCTAGTTCAGAACTCGCAGCATTCCCAGTCGTCCCGCTCGTTACCAGGTTCGTTTACCACAAGCCTCGGCATAATCACTCGCTTCTCATTTTCCCCGAGCTTCAGCCTTTTTA	1217:150:+
smaw_01_1322179	C01	1322179	8	+	G	A	GACGGGGGAACTTCAGTCTGGTTTAATGTTGCACCAAGATAATTGATCTGGGTCTTGAGAGCAGGCGGCGTGGAGCGACCTTGCTNNNNNNNNNNNNNNNNNNNNNNNNNNNNNNNNNNNNNNNNNNNNNAAACCAAAGCGTGGTTCGATAACTAATGTCTGTCTTTGTTGAAGATACGTGTGTGAGGGCAAACACCTCTGAAGGTAAATAAATC	1223:8:+
smaw_01_1333004	C01	1333004	159	-	T	A	ATAATGTGTTTTCGCCTCGTCATTGTCACTCACTTTCACCGCCAACGGAATTCAACAATCGGCGCCGTGCTGCGGCCTCGCTCCGNNNNNNNNNNNNNNNNNNNNNNNNNNNNNNNNNNNNNNNNNNNNNNNNNNNNNNNNATCAAAGACGTTAAGAAAAGACCTCTTGAATTAGATAAAGAGTAGGCGTCTGTGGCGACTCTGAAAAGGGCATTTCTCTCATCGTA	1238:159:-
smaw_01_1334300	C01	1334300	152	-	G	A	TTAAACGCTGCCGCAACAACGATCAGAAATAATTGGCCATTAGTGTATCAGCGGTGAAAACGCATGATGAAACCGTTTCTTAAGANNNNNNNNNNNNNNNNNNNNNNNNNNNNNNNNNNNNNNNNGTGTCGGAGGACGAGGCATTAGAGAGCGACACGCAGCGTCATTACCACTCAGCAGGTGACTGACGGGGCATTAGCCTCTCCTGCGGCGGCGC	1244:152:-
smaw_01_1339031	C01	1339031	37	-	G	C	CTGACGTCGGTGCTGTTCTAGTTTAAGAAACGTCTCCTAACCTTTCTTCAAAAAACCCACAGGCTGAGTCAAAAGCACGCGGCGCNNNNNNNNNNNNNNNNNNNNNNNNNNNNNNNNNNNNNNNNNNNNNNNNNNNNNGCGGCCTCGTACATTTCGGCAAATGTGCCTTTTCGGTTAAACAGCTTTTATGTAAAGAAAATAAACCAACACGCGTCAGAGTGTT	1248:37:-
smaw_01_1343780	C01	1343780	201	+	A	C	TTATTGACTTCACGAGGATGCGTCAGCCAAACAACTTTAAATTAGCCACAGAGTGAAATACAAGTCGGGGAGCGAGGAGGATTCANNNNNNNNNNNNNNNNNNNNNNNNNNNNNNNNNNNNNNNNNNNNNNNNNNNNNNNNNNNNNNNNNNNNNNNNNNNNACTCTGGCAGAGAGCAGCGGCAGAGTCCTCTGCTCAAACAGAACTCATCACCACAAGAGGAAGAAGAAGAGAAAACTAAACACTGCT	1256:201:+
smaw_01_1352314	C01	1352314	17	+	A	G	ATTTGCATTGACATGGACACATCTTCTATCCACTGGGTGGTTAAGTTAGCCCTCTTCAGAGAGTCACTGTAGAAAATGACACACCNNNNNNNNNNNNNNNNNNNNNNNNNNNNNNNNNNNNNNNNNNNNNNNNNNNNNNNNNNNNNNNNNNNNNNNNNNNNNNNNNNNNNNNNNNNNNNNNNNNNNNNNNNNNNNNNNNNNNNNNNNNNNNNNNNNNNNNNNNNNNNNNNNNNATCAGGAGTGATACGCTCTCCAGGCTCGTCTCCGACGCGGGAGTGTGTCATCATCATTGTACTAAACACGCTGCTTTGAGCAGGGG	1260:17:+
smaw_01_1361106	C01	1361106	282	+	A	G	GTGACGGCAATTCAAAAGACAGTTTAGAGCTGAAAACCACACGATGTGACTTTTCTGTGAGGAAACAGTGACGGTGCTTTTGATTNNNNNNNNNNNNNNNNNNNNNNNNNNNNNNNNNNNNNNNNNNNNNNNNNNNNNNNNNNNNNNNNNNNNNNNNNNNNNNNNNNNNNNNNNNNNNNNNNNNNNNNNNNNNNNNNNNNNNNNNGCCACACCCCCTGCTCCTCCAAATATGGCGCTGGCCAAAATGCTAAACTTAAGATTTTCAAAAATGTCAGCGCACAAACTCTTAT	1278:282:+
smaw_01_1367016	C01	1367016	208	-	G	C	CTGCGCGCTGAATTTATGCGCTCTGCTGGTGTTATCTGTAGATTGTGTTCTCTTCAATTTCACGGGGACTTGTGTTTCATGACAANNNNNNNNNNNNNNNNNNNNNNNNNNNNNNNNNNNNNNNNNNNAAGCCACTGTAGTGTTTGGTCGTAATGCGCTCGCCGAGGAGAGCGGCGCTCGCGTGTCGCCCGCGATGCGGAGCGGCTGCTTTTCACGCAGCGG	1293:208:-
smaw_01_1374790	C01	1374790	1	-	C	A	GGTCGCTGGAGCCGTTGACCTCGTCTCGGCGGGGTCAACAAGACAACAACCCTCGGGGGGGGGGGACAGTAAAGTCGGACATAACNNNNNNNNNNNNNNNNNNNNNNNNNNNNNNNNNNNNNNNNNNNNNNNNNNNNNNNNNNNNNNNNNNNNNNNNNNNNNNNNNNNNNNNNNNNNNNNNNNNNNNNNGTCACAACTCCAGTCATAATTCACAAAGCGTTGGACTTTACGACTTGTCTGGCTGCTCTGTAATGACTGACAGACGGAGGCTGTAACTCACAAAGCTCTGGACTTGTCCCCTCTGGTTCTGTCTTCGCCTCCGACCCGCTCCTCCACACTGGGGCCCCGGCTCTCCGAGGAGCAGGGC	1302:1:-
smaw_01_1379477	C01	1379477	240	-	G	T	TGATCCATTTAAACACCATTCCCATGGAAATTAATAGTCAAGATGCATTTTATTACCGAAGAGGACACAACGAGATGTCGGTGTGNNNNNNNNNNNNNNNNNNNNNNNNNNNNNNNNNNNNNNNNNNNNNNNNNNNNNNNNNNNNNNNNNNNNNNNNNNNNNNNNNNNNNNNNNNNNNNNNNNNNNNNNNNNNCTGTCACTTTTTCCAGAACTCAATTTCGGAGGAATTTCACATGACACAACATGAACTGTCGGCAGTACAGTTGCATTGTGGGAAA	1305:240:-
smaw_01_1385743	C01	1385743	198	-	A	G	CGGCGCCGAGCTTCCCTCCGCACAGAGCTCCGAGAGGGCCGTGGCCACGGAGCAGACCAGACAAGAGGTCGAGGAGGTCGAGGCGNNNNNNNNNNNNNNNNNNNNNNNNNNNNNNNNNCCTGCGAAGAAAAGCCCTTCCCAGATTCCTCTGGGCAAACCCTCCATCTCGGCCGTGAATAAGAAATCAAACGTGTCTGTGGAAANNNNNNNNNNNNNNNNNNNNNNNNNNNNNNNNNNNNNNNNNNNNNNNNNNNNNNNNNNNNNNNNNNNNNNNNNNNNNTCTCTTTCTCAGTCTCACCATGAGGCCGCCGATATCGAAGTCCAGTCCTATTCAAATGTGGTCACTTCTTCAGCTCAGGAATTCA	1310:198:-
smaw_01_1385967	C01	1385967	19	+	C	T	GGAGGGGGGGATGGTGATCGGCGGAGACGTGGGAGTTGTGACGTTACTCTTCTCCAAATCTTCTCTCTCCAGCATTTGCTGGCGGNNNNNNNNNNNNNNNNNNNTGAGAGGGGTTTTGAATTTGCGGGCGTAAGGCCTGGCCTTCGGGGTCGGAGCGGGGTCGGGGGGAGGAGGCAGTTTGATCGGAGGCACGAACGCTTTGCGTTCTTTTTGCGAAGGTTTCACAACCGNNNNNNNNNNNNNNNNNNNNNNNNNNNNNNNNNNNNNNNNNNNNNNNNNNNNNNNNNNNNNNNNNNNNNNNNNNNNNNNNNNNNNNNNNNNNNNNNNNNNNNNNNNNNNNNNNNNNNNNNNNNNNNNNNNNNNNGTTTGTTGAGCAGGTGGAGGCAGCTGAGGAGGAGG…	1312:19:+
smaw_01_1401696	C01	1401696	37	+	C	G	CCACTGACCTCCGTCTCTGCCTCCTGGGCCGAGGTGCCGAGAAGTGGGGAGGTGAGACAAGTGAGGAGCATGTATCCAGGAAAAANNNNNNNNNNNNNNNNNNNNNNNNNNNNNNNNNNNNNNNNNNNNNNNNNNNNNNNNNNNNNNNNNNNNNNNNNNNNNNNNNNNNNGTGTCAGGCAGAGGCCGTCTCCTAATCGCAGACGTGTCACCCCCTGCCCACGGCTGAAGTCTTAAGCAAACCCAATTTTCTGTTCCGCACTTACNNNNNNNNNNNNNNNNNNNNNNNNNNNNNNNNNNNNNNNNNNNNNNNNNNNNCAGCCACGGAGGGTGATTTCTTCTTCACAGATGAAAAGCAAAACAGGCACAATAATTGAGCTGTCAAATCAATCAAAACAGCT…	1323:37:+
smaw_01_1408743	C01	1408743	232	-	A	G	CCGCGCGTGCGAGCGGACGAGTCATAGCACAAAATATCTGTAGCTTGAGAGGTGCACTGAACTTTTTTTCCGTCCCAGAAAGATCNNNNNNNNNNNNNNNNNNNNNNNNNNNNNNNNNNNNNNNNNNNNNNNNNNNNNNNNNNNNNNNNNNNNNNNNNNNNNNNNNNNNNNNNNNNNNNNNNNNNNNTGGTTCCCTTGTTTTCTGAAGCTGCGAGTCTTCGACCAGTTTTGTAAAGACTCTAATTGTTTTTTGTCAGCAGAACTTCTGCACG	1333:232:-
smaw_01_1409793	C01	1409793	140	-	C	A	CGCACTCAGCCCAAAGAGGGAAAGGAACGAAAAGAGGAAGGAAAGACGATGTATCGGAGCAACAGAGGAGGAGGGAGCGAGGGACNNNNNNNNNNNNNNNNNNNNNNNNNNNNNNNNNNACAACCACATATTCAAACTCGACATGTGGATCATATCGGTGAAATAACACTACACTTCACACAAACCAAGTTAACAGTTTCATCTNNNNNNNNNNNNNNNNNNNNNNNNNNNNNNATGAAACCCCAGGACTCGGGAGACTGACGCTTTCTAAACGCAGGGTGACAGGGGAGGCGAGCGGGGGGAGGACGTCTGAGGAGCG	1335:140:-
smaw_01_1450781	C01	1450781	83	-	G	C	TCTTCATGGGCAACCTGAGGCAGAAGTGCGTGCGTCTGCCGATCGCCAGCAATGCCACCAACGGCAGCAGCAACGCGACCAGCGANNNNNNNNNNNNNNNNNNNNNNNNNNNNNNNNNNNNNNNNNNNNNNNNNNNGCAGAACGCCACCTTCAACTGGACGGAGTACATCAGCGACGAGGGTAAGCCACGGCGTGAAAGTGTCGCATGTCTGCCAGGCGCA	1379:83:-
smaw_01_1457483	C01	1457483	277	-	G	A	CTGTTGCTCAACAGACACGTGAATGTTACCAGGAGTGTTTCAAGGGAATATGGGGGCCCCAGGTATAAGGGACCTGCCTCCTAGTNNNNNNNNNNNNNAACAGCAGATTTTTAGACACGATGACACAGTCGCCCGTTCTTATCGGTCACGACTCGCAAAATGTTGTAAACTTTCGGAAAAGTGNNNNNNNNNNNNCCCTGCTCTCACTTTTCACCGAGGCGGTTCCTCGTTTGAAGTAGTTTGTGTACCTGAGCATCCGTCCGCAGGGTGAGACAACCTGCT	1389:277:-
smaw_01_1494993	C01	1494993	19	+	C	A	CGTATCGATCCTGCCTCTCCATCCTCTCCACGCTGCCCGACATCGTTAGAGACCAGATAGCGAGGGTTTAGTTTGGAGTCTTTCGNNNNNNNNNNNNNNNNNNNNNNNNNACCCAGAGCGGGATAAAGAATCTGAAACGCCCCGAGGGTAGGCAGCAGTGGTTTTTAATTGTTTGTAGTGTTAGTTGGCCACGCTGGAGGCGAGCTCTCCGGGG	1429:19:+
smaw_01_1495975	C01	1495975	22	+	T	C	CCAATTCCACCTACAGCTTTCTCCCTTTTTTCAGTTCTCCGATTCAATCAGAGAGTTTAAATATTCACATGTGGTGTCTTTTGTCNNNNNNNNNNNNNNNNNNNNNNNNNNNNNNNNNNNNNNNNNNNNNNNNNNNNNNNNNNNGGCAGGTCTTGTTGAATAGAGAGTGGGTCATCTCCCTGACAGAGCTCAACTGGTAGTTATGGCAGCCTGGCCACGGCTGGCTGGC	1430:22:+
smaw_01_1507018	C01	1507018	292	-	G	A	GGGGACTGTATCAGCTCCACTTCACGCCTGCACGGGGCAACTTGTTGTAACCATACGTGTATAAATGTACTGAATGTGTGTGTGTNNNNNNNNNNNNNNNNNNNNNNNNNNNNNNNNNNNCGCGCGCACACACACACACGCACACACGCACACACACCGCTGCGATGCGATTTCAACCGTGGCGCAGGTGCGCTCCCTGAACGCCACACGTACACATACGCATGGCGCGAGGTCATTTTACGCACAGGTCTCGTCTGCGGTAGAGGAAACTTGTCCGAGGCTGCACGAGCACGGATCCCCGCGCTGCCCCGCGCGCGTCCGCGGCACAGA	1436:292:-
smaw_01_1511540	C01	1511540	143	+	G	A	TCAGTTTGAATGTCTTGATTAGCGCGAGCGGCAAAGTAAGTCGGAGACACTTTTCGTGTCTGCGAGGCGGCGAAGGTGTGCGTGCNNNNNNNNNNNNNNNNNNNNNNNNNNNNNNNNNNNNNNNNNNTGTGTGTGTGTGTGTGTGTTTAAGCCTGGCGAGCTGCCAGCGGATGGACACAAAGGATGGTGAGTGGCTGGGCGTGTGGCGCAGCATCTCTGAGCTGCCGGT	1442:143:+
smaw_01_1526344	C01	1526344	262	-	C	G	CGGGGTGTCAGCACAAACTGCCCATTTTGGTAACGTCATAATTAAGCCGCGTGAGTGCAGGAGGGAAGAGACGCCGACATGCCTGNNNNNNNNNNNNNNNNNNNNNNNNNNNNNNNNNNNNNNNNNNNNNNNNNNNNNNNNNNNNNNNNNNNNNNNNNNNNNNNNNNNNNNNNNNNNNNNNNNNNNNNNNNNNNNNNNNNNNNNNNNNGCCCAGCGACAAGCGATAACTTCATCAGGATAGACCGTTTTTTTCACACCACAGGGGAAATCTAAGCTGCCACTTATTCAAATCCTTATCAAATACACCGNNNNNCATCTTCTCTGTGTGGACCTATTGTTTTATTACGTGTGTGTGTGTGTGTGTGTGTGTGTGTGTGTTTGACAACCTCTGCACCACC	1457:262:-
smaw_01_1555232	C01	1555232	282	-	C	T	AAGCTGATGTGTTTACTGAACATTATGAACCTGAATATGAGCATAATACGTCTCATGCAACTTAGAGATGGATAAAGAAATTGTCNNNNNNNNNNNNNNNNNNNNNNNNNNNNNNNNNNNNNNNNNNNNNNNNNNNNNNNNNNNNNNNNNNNNNNNNNNNNNNNNNNNNNGGAATAACGCTCGTCCGACATAAAACTTGTATCTGATGTGAGTTGCGGCTGCCGACGCCGTCTCGTGGCGTTCGAGATCCCCTCCCTGTTCTGACACGCGCCATAACGGCTGATTAAATGTGATAGCTGNNNNNNNNNNNNNNNNNNNNNNNNNNNNNNNNNNNNNNNNNNNNNNNNNNNNNNNNNNNNNNNNNNNNNNNNNNNNNCAAGAGAAGGCCTTGATTTAACC…	1487:282:-
smaw_01_1563639	C01	1563639	194	-	A	G	TCTCTCACCCGCAAACGGAGGGATAAGCCAGATACGCGGCGGCGCTGCCTCCTCGGGAGCAACAGAGGCCATTTTGTCAAGCCACNNNNNNNNNNNNNNNNNNNNNNNNNNNNNNNNNNNNNNNNNNNNNNNNNNNNNNNNNNNNNNNNNNNNNNNNNNNNNNNNNNNNNNNNNNNNNNNNNNNNNNNNNNNTTTAATCTGTCTGTCAAGGTTATTGAAAGTGCTGTCTTCGTTATTACATGCCAGCCTTGGACTTGGAGGGGCCATAAGTATGAGGNNNNNNNNNNNNNNNNNNNNNNNNNNNNNNNNNNNNNNNNNNNNNNNNNNNNNNNNNNNNNNNNNNNNNNNNNNNNNNNNNNNNNNNNNNNNNNNNNNNNNNNNNNNNNNNNNNNNNCATCT…	1491:194:-
smaw_01_1564070	C01	1564070	230	+	A	T	AACAGCGGGAGAAGAGCCTTATCGTTGAACGTGAAGGGTTGCTGGTGTGTTGCTCGCGAGGATATCACCCCACTTACCGCACGTGNNNNNNNNNNNNNNNNNNNNNNNNNNNNNNNNNNNNNNNNNNNNNNNNNNNNNNNNNNNNNNNNNNNNNNNNNNNNNNCCGCTTCTCGTCTGTCACAGTCGTTGCAGCGTTTCCCCCACGTAGGTGGCCCCGTCAATCCCCATTACGACCCGCTTTTCCACGGGTT	1492:230:+
smaw_01_1564148	C01	1564148	192	-	G	A	CAACATGTCTCCTGAATTCACATCAGGGTGTTTTTTTTCTTCTTTCACCTGTGAGCCGAGCCCACCTTGAGCAGTTTGATTTGCCNNNNNNNNNNNNNNNNNNNNNNNNNNNNNNNNNNNNNNNNNNNNNNNNNNNCGCGCTGGAAACTGGGAGAGGGGGGAATCTAAAGCCTGCGAGCTCAGGGGGGCTCCGCGCTTGAAAGGGATGCTGGGATTGGCGG	1493:192:-
smaw_01_1575059	C01	1575059	62	-	A	G	AAGCTCCTACAGTCAGCTTTATTGACGGACGGCATCGAGTGACACATCGCCGACTGACACTTGTCTTCTAGGACGGTACGGAAAANNNNNNNNNNNNNNNNNNNNNNNNNNNNNNNNNNNNNNNNNNNNNNNNNNNNNNNNNNNNNNNNNNNNNNNNNNGTATTGCTGCGGAATGTCTCTTTAAAATGTCATCTTCCTTTCTGCAAATGTTGCTGTGTCTTGACCCTCAGGGCCACCGTACTTA	1500:62:-
smaw_01_1576269	C01	1576269	6	-	C	T	TGCCAGAGAGAAGGTTTCCAAGACTGATACCTGTGTGCAGAGTAACGGAAACACGGTCTGTGGACAAAAGATGGAGGCATGCACANNNNNNNNNNNNNNNNNNNNNNNNNNNNNNNNNNNNNNNNNNNNNNNNNNNNNNNNNNNNNNNNNNNNNNNNNNNNNNNNNNNNNNNNNNNNNNNNNNNNNNNNNNNNNNNNNNNNNNGAACGATAAGTACAAACTCCTCGACGTGGACGCGTCTACAACAACAGGAAACCACGTCAGGCTCCGCTCCTGTCAGCCGAGAGCANNNNNNNNNNNNNNNNNNNNNNNNNNNNNCTGAAATGTATCCCGCTCGGATGAATCTGGATTCCTGCCGACTCGAGGCAGCAGATGGTCGGCTCAGAATCTGGCATGAGTC…	1503:6:-
smaw_01_1576295	C01	1576295	13	+	C	A	CATCCTACTCTTCCCTGGAGGATCCCATTCTTGCCAGTCGCTGACTTCACACTAATTCCTCTGCCAGTGGAGGAAGCACGATGGGNNNNNNNNNNNNNNNNNNNNNNNNNNNNNNNNNNNNNNNNNNNNNNNNNNNNNNNNNNNNNNNNNNAGAGGAAGAGATAGTATTTTTCTCTTTTAGGAAAAATCCTTCCAGGAGAGGCGGAGGTGAAGAAGTTGGCTTTTTTTGTGTGTGTAGNNNNNNNNNNNNNNNNNNNNNNNNNNNNNNNNNNNNNNNNNNNNNNNNNNNNNNNTAGGATACGTTGCCACGGCAACCCTGGCTCCTGATCCCGCAGATCGGCTGGAGCTGGCACAGAATGAGAGCGAGCGAGCGAGTAG	1504:13:+
smaw_01_1579880	C01	1579880	46	+	G	A	GTAAACCCCACCGTAGGCACTAAGCTCTAAATCCTGTGTCACATAGAGCGGTCGGCGGCTGTTTGACAGCAGACGGCGTCTGTAANNNNNNNNNNNNNNNNNNNNNNNNNNNNNNNNNNNNNNNNNNNNNNNNNNNNNNNNNNNNNNNNNNNNNNNNNNNNNNNNNNNNNNNNNNNNNNNNNNNNNNNNNNNNNNNNNNNNNNNNNNNGGAATTCTGTGTCTGCTCTCGCTCCAGGACGGTGGAGCAGGATGGATGTTTGCTGTCCAGAGGTGGTGAACCCCGCTTGAAGGACAAGGTTCCTACCTCGTGCAACGCTGACCTGGACCTCCTCGCTCCCAGAGT	1506:46:+
smaw_01_1588744	C01	1588744	219	-	G	A	TTTGGGACTGTGTGACTGTGTTTCTCCAGCTTTGGATCCGACACGCCAGGATGAATTTCAGCGCTGCGATGATACATAATGGTTCNNNNNNNNNNNNNNNNNNNNNNNNNNNNNNNNNNNNNNNNNNNNNNNNNNNGGAGGGTGTCGACGGACAAGAGCCAGATCGTCCGAATGGTCAAAAACAAGAGTCCTACTTTAAATCCTTCCAGTTCTAAAACCCACTCAGGTTTATAACGGCACCAGCCGAGGACAGCGACCGCGAGTCGACGACCTGCGGTGGAGCTTCT	1514:219:-
smaw_01_1617341	C01	1617341	208	-	A	C	ACTGTGTTCCCCGTCCTCACTCGTGTGATATCGGGAGATGGTGTATTCAGATGGCCCGTAACCATGGCGACCTATTCGATTTGCCNNNNNNNNNNNNNNNNNNNNNNNNNNNNNNNNNNNNNNTTGAGATGTTTCATAAAACAGCTTATGCAGCTTCAGACGAGGAACTTATGAAACATAATATTGAGTGTCTCGAAAGTACAATTATTACTGAGATTCTCC	1547:208:-
smaw_01_1618029	C01	1618029	187	-	G	A	ATAATCTAGGACTTAAAATCGTGAAACACACGTGTGAAGATTCTCCTCTGGTGCGTCAGGATTTCTGAGCTCAGCTGTGAGACGGNNNNNNNNNNNNNNNNNNNNNNNNNNNNNNNNNNNNNNNNCCATCGTCACCTTTATACGCCTGGGTGTCTGTGTTGTCTCCAGCCTGTGCGTCTGTGGCGCCGCTCAGCCCGAAGCCCAGGGAGTGNNNNNNNNNNNNNNNNNNNNNNNNNNNNNNNNNNNNNNNNNNNNNNNNNNNNNNNNNNNNNNNNNNNNNNNNNNNNNNNNNNNNNNNNNNNNNNNNNTCCTCCTCCTCCTCCTGGTCGTCAGCCTCCTCGGTCGACTCCATCCTCTCCTCAGCTGCTGAGGAGGCGTAGCTCTGCCTCCCTT	1550:187:-
smaw_01_1651870	C01	1651870	162	-	A	T	ATAACGACGACGGCGGCGTGTATGATGGATCTCAGGAGGTATCCCCTGGACGAGCAGAATTGCACTCTGGAGATCGAGAGCTGTGNNNNNNNNNNNNNNNNNTGCCGTTGGGGGATGACATTCACTGCTGAGGGCTGAGTGGGGAAACCGACAGGGTCCCGTGTGGGAACGGTGACAGTTTGAGCGC	1575:162:-
smaw_01_1652912	C01	1652912	46	+	A	G	GCTGTGTGCTCTAACTGCGCTTTAAACACATGGAATTTGCTCGACACTGGGAAACATCCGAGGACATTTTGACCCTGAGATTCACNNNNNNNNNNNNNNNNNNNNNNNNNNNNNNNNNNNNNNNNNNNNNNNNNNNNNNNNNNNNNNNNNNNNNNNNNNNNNNNNNNNNNNTATTAGAGGGTAAGGCTGCATTATTCTGTAGTATTCTTTATGTCAACCATCCATTATCTAAACCGCTTTATCTGGTAAGGGTCGC	1576:46:+
smaw_01_1653693	C01	1653693	255	+	G	A	GCTGAGGTGAACACATCGCCCAGAACGACGGGGACGCAGAGCGATGTGTTTACAGGACGGAGGAACCAAGGTAACGGAAAACACANNNNNNNNNNNNNNNNNNNNNNNNNNNNNNNNNNNNNNNNNNNNNNNNNNNNNNNNNNNNNNNNNNNNNNNNNNNNNNNNNNNNNNNNNNNNGGATGCAGGCGGATCATGCGGTTTTTCACGGTGACCCCGTGGACGAACGACTTCTTGTCGTTGAGGAAGTAGGTGTCGGGGACCCAGAGCNNNNNNNNNNNNNNNNNNNNNNNNNNNNNNNNNNNNNNNNNNNNNNNNNNNNNNNNNNNNNNNNNNNNNNNNNNNNNNNNNNNNNNNNNNNNNNNNNNNNNNNNNNNNNNNNNNNNNNNNNNNNNNNNNNGA…	1578:255:+
smaw_01_1659852	C01	1659852	191	-	A	T	AAACAGGCCGAAGCAGCGAGACGCCCACGCTGCATGTGGGCGTCGGAGAGAAAAACTGTCATTATAAAGAGGTGAAAAGATCCTTNNNNNNNNNNNNNNNNNNNNNNNNNNNNNNNNNNNNNNNNNNNNNNNNNNNNNNNNNNNNNNNNNNNTTCTCTTCGTCATGTCTCAGGTAATTATTGCATCTAGATTCCTGCTGAGTGACACCAGGAGGATTTAATCAGGCGTCAAGGTTAACAACGTTTCAACCCGGTCCGACCCCGACG	1584:191:-
smaw_01_1660232	C01	1660232	246	-	C	G	AGCAGATGCCGAGGCGTCGGAGAGCGGTGCACTAATTACCTCTGAGGTTTGACTGTGCGGCGCCGCGGGGCCGCCGCTGATGAGANNNNNNNNNNNNNNNNNNNNNNNNNNNNNNNNNNNNNNNNNNNNNNNNNNNNNNNNNNNNNNNNNNNNNNNNNNNNTTGTTGTCGCCGTTGTTGTTGGCGGGTGGAACTCGGCTCAGCTGGATTTAAAGATGCTGAATACTCCAATGAAGAACGTTGAATGCAGCGTGTGCAGGTGTGTTTTCATGAGCCAACTCTCGCAGACGTGGACAAACAG	1586:246:-
smaw_01_1668220	C01	1668220	49	-	A	G	AGCTCTTTTGAAATCCTGTATCTTCACATCACAATCAATTAGTCACGTTACCTATGTTGGCATCCACACAGCAGCAGGAGGGAAANNNNNNNNNNNNNNNNNNNNNNNNNNNNNNNNNNNNNNNNNNNNNNNNNNNNNNNNNNNNNNNNNNNNNNNNNNNNNNNGAGCCACGAACTGACTCACACACAGAAACTCTTTCCCCTGCCGAGGAAACACAGACACAGACACGGGCTGCGAGAGGAATCAGCG	1597:49:-
smaw_01_1685352	C01	1685352	23	+	G	T	GAGAGCGCGTGTCTCTCGGTACGTCTTTACTTGGAGATTGAAAGCCTCGGGCCTGGTTTCCCAAAAACGTTGTCAGCTGAAGTCTNNNNNNNNNNNNNNNNNNNNNNNNNNNNNNNNNNNNNNNNNAAAGTTTTCATTTAAGGAAGAACGTAGGAAGAATGTTCGAAACACTCGTCTGTGGCCCACTAACACGGGGGACGGGACCGACGCC	1624:23:+
smaw_01_1686950	C01	1686950	42	-	T	C	TCCGTGAAGCTGTGGGCTCCTTGGCGAGCTACAATGCTAGCATGTTAGCTGTGATCATGCTGGTGCTGGGCAGGTTTAATGAGCTNNNNNNNNNNNNNNNNNNNNNNNNNNNNNNNNNNNNNNNNNNNNNNNNNNNNNNNNNNNNNNNNNNNNAAAGCACATCGGAGGCTAATGGGACTGTTGAAGGAAATGCACTTGCCTTTTTGACATCTCTATTATTTCTGGACATTGTCGTGGT	1625:42:-
smaw_01_1693798	C01	1693798	231	-	C	A	GCCGAACACTCCCGCCCGCTTTGGCCTCGATTCCCAACACACACACGCACACACACACACACGTACACAAGGGTCGCACACAGCGNNNNNNNNNNNNNNNNNNNNNNNNNNNNNNNNNNNNNNNNNNNNNNNNNNNNNNNNNNNNNNNNNNNNNNNNNNNNNNNNNNNNNNNNNNNNNNNNNNNNNNCACTTGTTCTGCTCGGGGGGAATCTGGGTCGCTCTTTCACAAGGGGACCAGTCAGCCGCTTTATATGAAGATGAGACTCACTGCT	1638:231:-
smaw_01_1703603	C01	1703603	23	+	C	A	CCTGCACCAGCTACACAACTGACAACAGTGAAAATGTATTTAGGAGTGTGTGTGTGTGTGTGTGTGTGTTGATGTGGTCCCGACCNNNNNNNNNNNNNNNNNNNNNNNNNNNNNNNNNNNNNNNNNNNNNNNNNNNNNNNNNNNNNNNNNNNNNCCCTCTGCTCTCGGGATTACGACGCCATTCAGAACCTGTCAACAACTACAGACCAATCAGATCACTGGAAAATCAGAGTCATAAT	1653:23:+
smaw_01_1717776	C01	1717776	2	+	C	A	ACAGGGCAGCAGCAAAGCATTCTGGGTCAGGGCGAGTATTTGGGCACGTGGATATTTAAATACGGCTCATCACGAAGTATCAGCCNNNNNNNNNNNNNNNNNNNNNNNNNNNNNNNNNNNNNNNNNNNNNNNNNNNNNNNNNNNNNNNNNNNNNNNNNNNNNNNNNNNNNNNNNNNNNNNNNNNNNAATTTCTGGGAGTTATAAATATTTCACTTATAAATATTTATACCAACTATGCCGCATCAGTTTTGCCTGAAGAAGTACATTAGTCAGTGATCTGTGCTCC	1669:2:+
smaw_01_1751632	C01	1751632	33	+	C	T	CTGGATCAGAGTATTTGTCGGTATGTTGGCTGCGTACTGTGGAGGTGACCTCTTTTTCTTCCCTGCACAAAGATTTGGGCTGCGANNNNNNNNNNNNNNNNNNNNNNNNNNNNNNNNNNNNNNNNNNCCACGCACTCGATTGCATAATTGGACTGACGACACAAAACCCATATATAAGAGTGTGAAGGGTTCAATCACGTGAAGTAGAGAAACNNNNNNNNNNNNNNNNNNNNNNNNNNNCTGGAGACACTTCTTTTTTTTTACTCCATGTCTCCTTTGGAGCTCGCTCCAAATCAAATCAAATATTCAGGCTCCATCCCTGCGA	1706:33:+
smaw_01_1779667	C01	1779667	82	+	C	T	TCAGCGCTGACGGGGAATAAAGAGAATATTTGAAATGTGCTTCGCCAGGCACCTGATGGTGTAAGAGATGGAAGGCGAAGTCGACNNNNNNNNNNNNNNNNNNNNNNNNNNNNNNNNNNNNNNNNNNNNNNNNNNNNNNNNNNNNNNNNNNNNNNNNNNNNNNNNNNNNNNNNNNNNNNNNNNNNNNNNNNNNNNNNNNNNNNNNNNNNNNNNNNNNNNNNNNNNNNNNNNNNNNTACATGAGATTATGCTCTGGAAGGGGTCAGGGCTCTGCACACCTGACTCGCATGCATTGTGACAGGGAAGCGTAAAGTACGAAGTGG	1734:82:+
smaw_01_1799437	C01	1799437	3	-	T	A	CCACTCTAGGTTACGGTGCCTTGTTCATGGCCACCCTCCACACACTCCTCTTCGGCTGGGACCGAGCCTTCAGCTGGGACCAGTANNNNNTCTACCTGCCCCCCACCTTCCTGCTGGTGCTGATCCTCCCGCTCGGGGCTCTGCTGGGCCGCCTGGCTCTCGTCCTGCCCTGCGTNNNNNNNNNNNNNNNNNNNNNNNNNNNNNNNNNNNNNNNNNNNNNNNNNNNNNNNNNNNNNNNNNNNNNNNNNNNNTGCCACGACAGGCTGGAGGACGCCAGCGCCGTGTGAGGGATAGTAGATGATGGGTAGATGATGAATCATTTATACATTTACAAGC	1750:3:-
smaw_01_1802044	C01	1802044	221	+	G	T	GGAAAACCTGAAGAGGAAAGATAAAGAAAAACAAAGTTCAGAGGTCATCACTAAATTCTTTTATCCCCTGAACTCCCTGAATCTTNNNNNNNNNNNNNNNNNNNNNNNNNNNNNNNNNNNNNNNNNNNNNNNNNNNNNNNNNNNNNNNNNNNNNNNNNNNNNNNCCGTCTGGAGCGTCCAGGCTGAAATGGTGTTAAACCCTTTGACCACAAAACTCTCTGGAAACAGATCGGCCAGCTGTTGGGCATTGGAGGGCCCATCCCGGTTGATCTGCAAACCATTGCTGACGTCCACCAGCGTCTTCCCCGCCAGCGCCGGCTTCAACTGCGACAGCGTGGAGTGGTGCTCGGGGAACACGGCGACAAACACC	1755:221:+
smaw_01_1826792	C01	1826792	227	-	T	G	GGAGAACGAGTTGACTTTTAGAAGACGGACGGTTTCACCTGCACCGACGCTCTGCTGCCAATCAGTGTGTGAACCATCTCGTACANNNNNNNNNNNNNNNNNNNNNNNNNNNNNNNNNNNNNNNNNNNNNNNNNNNNNNNNNNNNNNNNNNNNNNNNNNNNNNNNNNNNNAGCAACGTCTGCTGAGACTTGCACATTGTAGTTTTCATAAACAGGCAAAAAAACAAAAGAATGTTAATTAAAAACCTGCGGAATA	1775:227:-
smaw_01_1834764	C01	1834764	7	+	G	A	CCAGACGCGAGGAAAAAACATAACGACATATCACAAGGAAAAAAGTGAACGGGTTGTTTTGGGCGGGACACGTTTCAAGTTACGANNNNNNNNNNNNNNNNNNNNNNNNNNNNNNNNNNNNNNNNNNNNNNNNNNNNNNNNNNNNNNNNNNNNNNNNNNNNNNNNNNNNNNNNNNNNNNNNNNNNNNNNNNNNNNNNNNNNNNNNNNNNNNNNNNNNNNNNNNNNNNNNNNNNNNNNNNNNNNNNNNNNNNNNNAAAAAAGAAAAACAACAACTTCTCCCCAGCGTTATGACAAGCGTGCGGTGGAGACCCGTCACCGACGAGGAGTTTACATGTCATCGTTTGGAGAACGCCGGCC	1781:7:+
smaw_01_1835174	C01	1835174	332	-	T	C	CTCAGCACAGTGTGTGATAGTACATCAGTCCACGTCTGAGTACATTCTCCATCGTAATACTCGCGCCGTACATTGTCGTATTGCANNNNNNNNNNNNNNNNNNNNNNNNNNNNNNNNNNNNNNNNNNNNNNNNNNNNNNNNNNNNNNNNNNNNNNNNNNNNNNNNNNNNNNNNNNNNTGTGTCCCCCACATGTCCTCAGTTATTTTTCACCGTTTGACTCAAACAGAAAGAGACAGAGTCCCGAATGCCGCAGTGGACGGAGNNNNACGCCGCTCTGAGGTCTGTATTTGGAGAATTCCTGCGGAGACGTGGGAAAATAACGCGTGCGCGCACACACACACACACACACACACACACACACACACAC	1783:332:-
smaw_01_1846866	C01	1846866	217	-	C	T	GCCGAGATTTTCCTCGCCGTGACTCACAAACTGGCTTTGACGTGCGAACCCGTTTGTGCCACCGTGCTTCTTCATTAGCAAGCAGNNATGAAAAGGTTGTTCGAACGCCTCACACAATGTAGTCAGGACCGCAGCAGGCCGAGTCCAGTTCTGTGGGAGGGAGTTCCCCACGTCTCTCTCTGGGACGAGAATCTCATCTCCAAACCTGTCTGTCCCGCCACCTCCGTTGATTGGTCTTGACCGGCGCAG	1800:217:-
smaw_01_1852335	C01	1852335	34	+	G	A	GAAAAATAACGTCTGAAGAAGTGATTTATTAACGTCACAATGCGAGACGTACAGCACAGTAGTCGTTTTTAGGGGCTTAGAGCAANNNNNNNNNNNNNNNNNNNNNNNNNNNNNNNNNNNNNNNNNNNNNNNNNNNNNNNNNNNNNNNNNNNNNNNNNNNNNNNNNNNNNNNNNNNNNNNNNNNNNNNNNNNNNNNNNNNTGGCTGTTGTATCGAAACCATGGGGATAAAGAAAGAGCAGAGGAATTCGTCAAAGTTCAGTCTTCATTACAGTCTCGCATGTGGC	1806:34:+
smaw_01_1856128	C01	1856128	182	-	G	A	GGATTTGTGAACATGCATCCAGCCGCCCTGCGAGGCGAGAGGGATGAAGTGATTAGAACAGGGAGGGCGGTTTGAAGGCTTTTACNNNNNNNNNNNNNNNNNNNNNNNNNNNNNNNNNNNNNNNNNNNNNNNNNNNNNNATCCCATCAGATACAAGTCCCCTACGAAGATTGTATGACATACGTGTCGTGTGGATCATTTTGGTTTTACTAGCAGCATCAGCGANNNNNNNNNNNNNNNNNNNNNNNNNNNNNNNNNNNNNNNNNNNNNNNNNNNNNNNNNNNNNNNNNNNNNNNNNNNNNNNNNNNNNNNNNNNNNNNNNNNNNNNNNNNNNNNNNNNNNNNTGCTTCTCTTACGCTTCTCTTTCTTCTTCTGCTGTTGAATGCCGTCTCAACTTCCT…	1813:182:-
smaw_01_1857883	C01	1857883	59	+	G	A	ACGGGACAGAGTGAGACCTCTTCACAGTCTATTTCTGTGGATGAGATCTGAGAAGGAGGCAAACGCTCGTAAATATGAAAACACCNNNNNNNNNNNNNNNNNNNNNNNNNNNNNNNNNNNNNNNNNNNNNNNNNNNNNNNNNNNNNNNNNNNNNNNNNNNNNNNNNNNNNNNNNGTCATGTCCGCCGAATGTGATCTTCCGTGTCGAGAACGTGATTATCCCCGCGAGGAATTAAATACAGGAGGTTTGCCAGGTGCCAACCTTCCACAGCCCGCTTTCAAAGAAGAGCGTGGTGGCTGCACAAACAACACACGGCGCGCCATTCAGCTGCCGGCGTCTCGGAGCAGCAGTCA	1814:59:+
smaw_01_1864861	C01	1864861	133	-	G	A	TCTGGGGAGGGTCGGTGCAGTCGGACCCCCCGCCACCTCCAAATCCTTATTTTAGCCCTGCGCTAACTAGTCGGGTCCAATAAACNNNNNNNNNNNNNNNNNNNNNNNNNNNNNNNNNCTGGTGTGGTTGTCCGTGCCACCCACTGTGACACGCCAGCAGGCGGGCGTAAAATGGGCATGTCAAATGCCATCAGAGAGGAAAC	1818:133:-
smaw_01_1892477	C01	1892477	76	+	G	A	GGGACGACAGGAGCGCTCACGTGGCGCCAGCTGAACCGTCAGTCACAGAGAACTTTCACTGCGCCTTCAAAGTCTGCTGATTTCGNNNNNNNNNNNNNNNNNNNNNNNNNNNNNNNNNTTTGGACATTTTCTCAGGAACGCATGAGCGCGCGTGTTCGTTGTAGGGGGTCAAATGTTCCATCGCGTGACTTCCCCGTCACTCGGGGGTCATAGTGACGCAAACATGGCCGACAGCGCTTCACTTCAGCGGACACCGACAGTTGTCACGCGGCGATCATACAGTGACGAAAGTATTAACAG	1837:76:+
smaw_01_1901477	C01	1901477	207	+	G	C	TGCAGCAGCCTCGAGACTGGGACAATAAGTGCAACGCGTGAAAAACTTTTCAATAATATGCCCCAGCGACAAGAAGAAATCATCCNNNNNNNNNNNNNNNNNNNNNNNNNNNNNNNNNNNNNNNTCTGGTCCGCCTCGTCCTTCCCAGGTCGTCTCGATGGTTTGCATTATCCCCACCGCTCCGTCTGGGGTTTTGAAGTGCCAGGGAGNNNNNNNNGAGCCCGGACCTCCGCGGCTGAAGCATCCCAGAGGTTAGAGGGATGTCGACACAGCAAATCACAGTTCTGATGACATTCCCATCT	1845:207:+
smaw_01_1929310	C01	1929310	82	-	T	A	GAAGCTCCCGTGGCTGGTGAGGTTGGTCTTGTTGGATTGCGTTGACATAGCTGAGTCGTCCGAGCCATCGTCATTAGTGTCATTCNNNNNNNNNNNNNNNNNNNNNNNNNNNNNNNNNNCGACTTGGTGGGAATGATGAGACCTACGTGATGCTGTCCCGTTGGAATCAGATGTGACCCCACGTTTGCAGCCCCTACAGTTAGGNNNNNNNNNNNNNNNNNNNNNNNNNNNNNNNNNNNNNNNNNNTCCCGTGTGACCAGACAAGCCACTAACAACCCTATTTACTTCTTCATCCTCATTATCTGCTGCGGCCTCTCCCTCTAATTTTAGG	1879:82:-
smaw_01_1930196	C01	1930196	48	-	A	G	GCAGTCTGATTTCTTTGTATGTTGAGACTTTGCAGAAGAAGCTGATTTAAAAGATAAAACACTGGCAGTTCCTGTGTTGCCATTANNNNNNNNNNNNNNNNNNNNNNNNNNNNNNNNNNNNNNNNNNNNNNNNNNNNNNNNNNNNNNNNNNNNNNNNNNNNNNNNNNNNNNNNNNNNNNNNNNNNNNNNNNNNGCTTTGGTGGACCTATGGGAATTCTCAGACTTGGCTGACATGGCACTCGCTGCCCTCATTTCCACCTCTGTTCCTTCTTCATCAA	1884:48:-
smaw_01_1932029	C01	1932029	12	-	A	G	ACTCGTCTCCGTTGCTGCCTCTTCTCCAGCTTTCTCTTCCACCTCCTTCTCCAGCTCGACCTCTTCCAGCTCGTCGCCAAGCGCCNNNNNNNNNNNNNNNNNNNNNNNNNNNNNNNNNNNNNNNNNNNNNNNNNNNNNNNNNNNNNNNNNNNNNNNNNNNNNNNNNNNNNNNNNNNNNNNNNNNNNNNNNNNNNNNNNNNNNNNNNNNNNNNNNNNNNNNNNNNNNNNNNNNNNNNNNNNNNNNNNNNNNNNNNNNNNNNNNNNNNNNNNNNNNNNNNNNNNNNNGACTTCCTTCAGCAGGTCAGCAGCGGAAAGAGATTGAGACAGGATACTTTCACTACAGGTTTCCACTCTGCTGCATGGTCTGGAG	1886:12:-
smaw_01_1942637	C01	1942637	235	-	T	C	ACCCAGAGGTTTACACTCCTGTACTGCTCGGCTTCAACCCCCCACATCAAGCCAGGTGAGTATAAACGTTCTTCAATCACACGCCNNNNNNNNNNNNNNNNNNNNNNNNNNNNNNNNNNNNNNNNNNNNNNNNNNNNNNNNNNNNNNNNNNNNNNNNNNNGTAGCGACGAGCCCATTCCAGGCTGCACGTTCACATTTCACAGTGTGGTCCAAAGGATGCAGGAGCTTGTCAGAAGGGAAGAGGCC	1897:235:-
smaw_01_1976449	C01	1976449	121	-	C	G	CCAAATGTACAGCACGAATAAACGAGGGCTTTTGCAGCTCCACGGCTCCAAACAGTAGACCGACTGTAAAGGGGCGAACGTGCACNNNNNNNNNNNNNAGAGAATCTTCGGCGCGGAGGGGTGGCGTTTCTTACACACCTCGGTCGGACCTGAAGTAGCTGTCCTCCGTCGCCACTCTGGCAA	1932:121:-
smaw_01_1980550	C01	1980550	57	+	T	C	TTGCACAGCGCCGCTGCCAAGAGCTCGTCTCGTGAATCCACAGCGCGCTGCCGAGATTTCTCTTTTCTACCGACACACCACGAAGNNNNNNNNNNNNNNNNNNNNNNNNNNNNNNNNNNNNNNNNNNNNNNNNNNNNNNNNNNNNNNNNNNNNNNNNNNNNNNNNNNNNNNNNNNNNNNNNNNNNNNNNNNNNNNNNNNNNNNNNNNNNCCTGCTGTGGGATCCCAGCACCTGCCTCTGACCCATTTCAGAAGCTGATGGATGGAAGGTGAAAAGAGGCTTTTGTGCATCTGCC	1938:57:+
smaw_01_1985286	C01	1985286	156	-	T	C	AGTAAAACACGCCGAGCTTCACTTCGTTTTCAGGAACCGTGTCGTGTGAGTAAAGGATCCGTCCGCACGACGACGTGTGCGTCACNNNNNNNNNNNNNNNNNNNNNNNNNNNNNNNNNNNNNNNNNNNNNNNNAACCTGCCTCCATATTTGACCGACGCCAGGGGGACACGGAGGAGACCGAGGATTAGAGCACAAACGCCACAATAGCTGCTGAACAGCACCGTCGTAACCGG	1945:156:-
smaw_01_2004772	C01	2004772	17	-	G	A	GAGTCGACAGTGGGCGCGATGATGTGGCAGCAGCTGACGGTTGTTCAGCTCCACAAGTGTGCACTCAGAGGGAAACGTCGCTGTGNNNNNNNNNNNNNNNNNNNNNNNNNNNNNNNNNNNNNNNNNNNNNNNNNNNNNNNNNNNNNNNNNNNNNNNNNNNNNNNNNNNNNNNNNNNNNATGGACCAATAGGAAACGGTGATAACAGATGGGAATTTGAAGCGAAGAAGCAAATTGATGATCTTAAAAACTTTTCATTTGTCCCGTTTTCATTTCTGCGTTATTGTTCTGAGGCTGAACCGGTGTCCCGACCTGACA	1971:17:-
smaw_01_2020111	C01	2020111	215	-	G	C	ACTGAGATGTGCTCAAAATCTTGGCAGGAAGTGAAGTGAAGCCTTGTGTTTGGACACAGCGGCTACAAGAGCGGTCAGAGTAGGTNNNNNNNNNNNNNNNNNNNNNNNNNNNNNNNNNNNNNNNNNNNNNNNNNNNNNNNNNNNNNNNNNTTCTAGGTCATCAAAAGGAAAAGCGTAGGAGTTCGTTGTCGCCCGATTAAGCAGCGTGACCTCACGCGTCCATCTCCCCCTGTCT	1985:215:-
smaw_01_2025283	C01	2025283	68	-	A	G	TTGGAGGAAATCATCTAATTTCACCAGTGAAGGAAAAACTGCACAAATACAGTGAATTCAAACCTGTTCTTTGCTGCCACCTGCTNNNNNNNNNNNNNNNNNNNNNNNNNNNNNNNNNNNNNNNNNNNNNNNNNNNNNNNNNNNNNNNNNGTCCCACCTGGCCAGGTCCTTGTCCTTGTTGAGGTGCTGGAAGAAGGACGGCTCACAGATGAGCTGCTCCTCCTGACACACCTGC	1992:68:-
smaw_01_2063631	C01	2063631	37	+	A	C	GGAATGTGACGGCCTCATCTCTCTGATATTGATTGGAGTTTCTGAGGTCTGTCTGGCTCATTGTGTAACTCTCACAAGAGCAGATNNNNNNNNNNNNNNNNNNNNNNNNNNNNNNNNNNNNNNNNNNNNNNNNNNNNNNNNNNNNNNNNNNNNNNNNNNNNNNNTTGACTGACTTTAGCTGCGTTCAGATCATCAAGCACGGCTGAGGAGGAGGTAGCTGCGTGGACGTGGACAATAATGTTCTTGACTCCAGGCGATGGAACGATTTGCGAGCTCGTCGGCGCAGCCAACGTCCCGGTGTGTTTACAGGCCAAACC	2021:37:+
smaw_01_2087226	C01	2087226	53	-	T	C	AGATGAGATGACTCAGTCCAATTAGGCGTTGTTTTCTTTCTCTCACAGTAAAATAACGGATACATCCCTGGGGGTGATCTGAAGGNNNNNNNNNNNNNNNNNNNNNNNNNNNNNNNNNNNNNNNNNNNNNNNNNNNNNNNNNNNNNNNNNNNNNNNNNNNNNNNTTAATGCTGCGGGCGCCTTCCACCACTGCAAACTGGGAAAATGGTGGTGGTGAGGAGGAGGAGGAGGAGGTTTACAACACATATAAGGTGCACACTGCTGAGCTCCGAGGTTTCATAACAGATGAGGAAGGAGAGAGGTGGGATTGTGTGAG	2041:53:-
smaw_01_2090068	C01	2090068	270	-	C	T	CGCCGATAAAGGCTTCTCCTGCTTTACCCAACAATCGGGAGTTAATCGTTGTATGTGAGTCTTGTTGGCATTCTTACACAAGATCNNNNNNNNNNNNNNNNNNNNNNNNNNNNNNNNNNNNNNNNNNNNNNNNNNNNNNNNNNNNNNNNNNNNNNNNNNNNNNNNNNNNNNNNNNNNNNNNNNNNNNNNNNNNNNNNNNNATTTCCCCCGTTAACGTCTTCCTCGGCGGGGACAGCTTAACACAAATTGAGCCGTCTTTCCGCGGTCTCGCTCGGCTTGTTAGCGCTGGGGGG	2047:270:-
smaw_01_2094085	C01	2094085	216	+	A	C	CGTCTCTGGAGATGTGGAGGTTTCTTCATCTTCTGTTCTCCTCCTCTTCTTCTTGACGCTGGCACTCGGGGAGAAGAAGGAACGGNNNNNNNNNNNNNNNNNNNNNNNNNNNNNNNNNNNNNNNNNNNNNNNNNNNNNNNNNNNNNNNNNNNNNNNNNNNNNNNNNNNNNNNNNNNNNNNNNNNNNNNNNNNNNNNNNNNTACATTGCTGTGCTAAATCCTGCGAAATACTGGGGGGGAAATCATTCACATTTGAATTATCTCTGACTAGAAACTAAAGAGAGGT	2052:216:+
smaw_01_2103451	C01	2103451	215	-	A	C	TTATGAAGAAATGCTTGAACGTAAACTTTTTAATTAGGAGGGAGAAAAAGAAACGCAATGAGCGACAGAGTCTGAGCTGCGTTTGNNNNNNNNNNNNNNNNNNNNNNNNNNNNNNNNNNNNNNNNNNNNNNNNNNNNNNNNNNNNNNNNNNNNNNNNNNNNNNNNNNNNNNNNNNNNNCGTCCTTGACTTTGACGAGGTTTGAATTCACTGAAATGCTAATTATTGCAATAAATGGCGCAGTGCGTTCACGTGTCGCCACAAG	2061:215:-
smaw_01_2120786	C01	2120786	168	-	C	T	AGCAGGTGAAACAGTTTCGGCAAAAAAAACCAATTATTGCCGTTTATTTTGGAGCCTCGGGAGCGTGTGTAGACAACCAACACGGNNNNNNNNNNNNNNNNNNNNNNNNNNNNNNNNNNNNNNNNNNNNACATAAAAAGAAGGCATGTTATATGTCGAGAGGAACACGTCGTCTTCACCAGCAGCAGCAGCCGCAGGGACGGAAGCAGCATCCG	2084:168:-
smaw_01_2121285	C01	2121285	324	+	C	T	CGTGACTCCGCTGACATCCATTACACGGGTTGGGGCGTATTTTTGGGAGCTGATGACATTATCAGATATTGAGGCCGTGGATGCTNNNNNNNNNNNNNNNNNNNNNNNNNNNNNNNNCGACTAAATAATTCATCCCCATCCGTCCAGGGGTGGTCGGTGGGTGCAGAAATCCCTCCTTCCCATAATATTTGGTCAGGGCCATNNNNNNNNNNNNNNNNNNNNNNNNNNNNNNNNNNNNNNNNNNNNNNNNNNNNNNTGGTATAAAGGAAGCACAATAATAAATTCTTCAGAGACCTGGCATAACGAATGGCACAATTATGAGGCAGGATTGGATCGGATCG	2085:324:+
smaw_01_2123140	C01	2123140	28	+	C	G	TGTTGTCTGCAAATTGACTTTTAATGACTCTGGCGGACTTTTTGAGTTATTCCTCTCTCGAAAGGCTCCATAGATTTAAAACTGCNNNNNNNNNNNNNNNNNNNNNNNNNNNNNNNNNNNNNNNNNNNNNNNNNNNNNNNNNNNNNNNNNNNNNNNTGTCCTATGGGATGGGTAATAGATTACCTACATGCTCTGCTGTGAATTTAATTCATTAACGCTGGCTGCTTGCGCCTGCTGCTGCGCCACGCCGCCTCACACGACCCG	2089:28:+
smaw_01_2127285	C01	2127285	44	-	C	T	TATTTCTCAGATTCCATCACATTCCCTAAGTGTTCCTGTCAAAGAGAAGGAGAGAGGAGACGTACTTGATACGAAGCCAGTGGTGNNNNNNNNAAAGGAGGACGTGGCTGGTGAAGTCGATGAGGCCGAGCCTGCCGTTGCCGTCCGAGACTTCTCTGCCCATGACTGCTTCAGCTGCTCTGAACAGCGGCCGGGGCCTGCGACGCCCTCATGACC	2093:44:-
smaw_01_2148605	C01	2148605	135	-	C	T	TGGACGGACGGTCCTCGTGGGACGGGAGTGAGCTGCTCGGAACGCTGCCGCATAAATCATTCCCAACGCCGCCTGCCCTACTAACNCAGCCTCGTTTTACAGCTGGGACAATGGGAAAGTCACCTCTTCTTCCTGTGTGTGTGTGTGTCTGTTCATTGTTCTCCCTCGCAGGTNNNNNNNNNNNNNNNNNNNNNNNNNNNNNNNNNNNNNNNNNNNNNNNNNNNNNNNNNNNNNNNNNNNNNNNNNNNNNNNNNNNNNNNNNNNNNNNNNNNNNNNNNNNNNNNNNNNNNNNNNNNNNNNNNNNNNNNNNNNNNNNNNNNNNNNNNNNNNGCCGAGCACTTTCTCCACAGCAGCCGAGAAGAGGAGGAAAATGACTGAGGCTCTTTGAGAGACATTCAT…	2115:135:-
smaw_01_2152056	C01	2152056	202	+	C	T	TAATGTCGAGGTAAACAGGCTGTGCAAATGAAGTCAACACTGGCGTAACCAGAAAATGAGGAGAAAATAGTCCTCAGCATTAGGGNNNNNNNNNNNNNNNNNNNNNNNNNNNNNNNNNNNNNNNNNNNNNNNNNNNNNNNNNNNNNNNNNNNNNNNNNNNNNNNNNNNNNNNNNNNNNNNNNNNNNNNNNNNNNNNNNNCCCTTTTTTTTTTGAATGAAAGTGTTTTGTGTTCCTTCCCCTGATTTCTCCCGCCGCCCCGCTGGTGTGTTGTGTGTAGAGCAGC	2121:202:+
smaw_01_2160875	C01	2160875	196	-	C	A	GGGCTTTGGATAAGTCTCTCCGTCCTTTGTCTCAGCATTTGCATTTCACTTAGAGTCACCGTCGTTCATCTTCACCAGGCGACTGNNNNNNNNNNNNNNNNNNNNNNNNNNNNNNNNNNNNNNNNNNNNNNNNNNNNNNNNNNNNNNNNNNNNNNNNNNNNNNNNNNNTGTATTCACAACCTCTTCCTGCACGCTTTCACCTCTCTCCTCTTCATCTGTCCCCTTCTCCTCGCTGCCAGACTCGTCCCTCAACACACAGACGGAG	2129:196:-
smaw_01_2174377	C01	2174377	4	+	C	T	TGACGCACCTCGGGACCTCGTGTGTGTCGCTGTGAGATAAAGAGCATTTGAATGTCCGTGAGCGGTTAATGTGCGAGGGGAAGATNNNNNNNNNNNNNNNNNNGGGACGCAGTCTGGAACATCGTGGAATGTCACTTCTTTTCTTTTTTTTCTTCTTTCTTTTGGGTGGAAGTCAGGAAACATCTGGGAATTTGAATAATGAGTCACATGGAATGAATAGAGCAGCACGTATTTTCCAACATGTGTCATGTATGGATTTTTTATTTT	2141:4:+
smaw_01_2175157	C01	2175157	13	+	A	G	TCAAAACGGCAGACGCGAAAGAAAACGTCTCCTTTTAATAAAAAGATCCTGAAAAGCTGAACTCTCTTCAACGCACACACACACANNNNNNNNNNNNNNNNNNNNNNNNNNNNNNNNNNNNNNNNNNNNNNNNNNNNNNNNNTGAAATGTTTTTTGCACGGACGCTCTTCAGGATCGTACTTGCAGTACGAGACCTCACACACTTCAAACAGCGACACACACAATGTGT	2143:13:+
smaw_01_2179839	C01	2179839	36	-	G	A	AGTTACATGGGCGAGGGCGGATCAGTTCCAGACCACGGGGTTGAGTTGTTGTGTTCAACCCTCCAGGCGACAAAAAGAAGTCGTTNNNNNNNNNNNNNNNNNNNNNNNNNNNNNNNNNNNNNNNNNNNNNNNNNNNNNNNNNNNNNNNNNNNNNNNNNNNNNNNNNNNNNNNNNNNNNNNNNNNNNNNNNNNNNNAAATCATGACATCACTCCTCTTGCTCATTTCCTGCTGGTGCGAGAAAAAAGCCTGGGCCGCGTCCGCTCCGTCCTCCCAGAGGAAGC	2152:36:-
smaw_01_2183595	C01	2183595	66	+	G	C	TGGTTCCGAACTATCCCGAAAAGTGTTTTACACGCTGCCAACGAACCGAGCCGCGGAAACCGAGAGCACCTCTCTTGGTCGGACCNNNNNNNNNNNNNNNNNNNNNNNNNNNNNNNNNNNNNNNNNNNNNNNNNNNNNNNNNNNNCTCTCTCTATTGCATCCACTGACAAACAGACTGACACAGTCATGACTCACACACACACACACACACGCAGTGTTGACATTTCTGTGAGTGAAGTGTGACCGGGAGCGAGTCCTATCTGCCGCTCGCGGAAAAGGTTGAGCCGCATT	2157:66:+
smaw_01_2185106	C01	2185106	45	-	A	C	CGAATTGAGGAAAGTATCTTCTTCAGCGGTGGCGAGCGGAGAAGTGATCCGTGGCTCCGTATTAAAACTATTTATCAAAACTGTANNNNNNNNNNNNNNNNNNNNNNNNNNNNNNNNNNNNNNNNNNNNNNNNNNNNNNNNNNNNNNNNNNNNNNNNNNNNNNNNNNNNNNNNAAAGTGACAAAGACTTTGAGTTCACCCAGGCTGTGATCTGCTTATATCTCCGAAATGGAGAAAAACTGTCCAATGAGGAATGGCANNNNNNNNNNNNNNNNNNNNNNNNNNNNNNNNNNNNNNNNNNNNNNNNNNNNNNNNNNNNNNNNNNNNNNNNNNNNNNNNNNNNNNNNNNNNNNNNNNNNNNNNNNNNNNNNNNNTTCTCTCGTTTCAGACAGTTTCCGTC…	2159:45:-
smaw_01_2205701	C01	2205701	35	+	C	T	CTCGAGGCGCACAACTGGGAGAAAGGCCTAATTGCACAGTTCAGCGGCACTGACAGCGCTCGAAGCGTTATGGAACAGACTGGAGNNNNNNNNNNAGACACCTGCACCAATGTTCTGCCCTCTCCGACCCTTCCTGCCACAGTTGTTACCGACGAGCACAGGTCAAAGTGCTGTGGAATTTTGTGGAGCT	2188:35:+
smaw_01_2220374	C01	2220374	209	-	C	T	TGCAAGGTCATTCTCAGGTTACATAACACAGACTAATGATTCCATTCGTGCTGAGATTAGGTAACAACGTCCTTTAACTTACCTGNNNNNNNNNNNNNNNNNNNNNNNNNNNNNNNNNNNNNNNNNCGGCGAGGGCAGCGCCGTGGGTGGAAAAGCGGATCCTGATTGGTCGGTTATTCATAATTGTCCCATCTAGCTCAGCTTTGGCGATC	2201:209:-
smaw_01_2221151	C01	2221151	264	-	C	A	TCCTGGTTCCTCAGCTCCTCCAGTCTCCTCAGCTCCTCCTGACGTCTCATTAGATCTGGAAGAGAAAAGGAATCAGACACAGGTTNNNNNNNNNNNNNNNNNNNNNNNNNNNNNNNNNNNNNNNNNNNNNNNNNNNNNNNNNNNNNNNNNNNNNNNNNNNNNNNNNNNNNNNNNNNNNNNNNNNNNNNNNNNNNNNNNNNNNNNNNNNNCTTGGACTCTCTGATGTTCCTGTCCACCTGCTCCCGCTGCTGCTTCTCCATCTCGTCCAGAGCTTTCCAGCGAGACGAGTATTCAA	2204:264:-
smaw_01_2232998	C01	2232998	30	+	G	A	GAAACGTGAAGGACTATCAGCTGTGGGTCGTCTCCAAGAGGGACAACGCCCCCTATCCTCTCATAGGTCAGTGAACCAGGTCCACNNNNNNNNNNNNNNNNNNNNNNNNNNNNNNNNNNNNNNNNNNNNNNTAGCAAAGGTTCAATTGTGTGTAAACTGTGTCTCAGGTCACGAGTTTCCGTTCAGCATCCAGATGAGTCACGTGAGACACGCGCCGTCTCAGGCAGGCCGGGAGC	2207:30:+
smaw_01_2241212	C01	2241212	38	+	T	C	CCAGGCTGAATTCCAGAGGTGTACATCTACACTGAGTTATAATACTGTTGCTGGACTTTGCAATGCAAGCACACAAAACAATCTGNNNNNNNNNNNNNNNNNNNNNNNNNNNNNNNNNNNNNNNNNNNNNNNNNNNNNNACTGTAGTAGTACACACTATTCCTGTTCAGTGACCCCTGACACCCTCAGCCGTTCCCAGAACTCCCTGGCCGTGCACGTTGAACTNNNNNNNNNNNNNNNNNNNNNNNNNNNNNNNNNNNNNNNNNNNNNNNNNNNNNNNNNNNNNNNNNNNNNNNNNNNNNNNNTACTGCTTTAAGTGGGTTTTTGTCAATGGGAGTTATGGGAGGGTCAGGGCCAGTTGTCAGCATGTGGAGGGCGGGACGGTGTTAG	2225:38:+
smaw_01_2256817	C01	2256817	41	+	T	A	GTGGGAGAGGGGCGTTGTGCTTTCTGTTGCCGTCTACACCTTGCGTATTTACTGACACGGTCATGTTACTTGTGTCTGTGTTTTANNNNNNNNNNNNNNNNNNNNNNNNNNNNNNNNNNNNNNNNNNNNNNNNNNNNNNNNNNNNNNNNNNNNNNNNNNNNNNNNNNNNNNNNNNNNNNNNNNNNNNNNNNNNNNNNNGCTTAACTGTGCCAGCGTTCCCAGAGTTCCCTCTGTGGCAGATGCCGCCGCCGTCCCGTCGGGCTCTTGTGCCAGGAATGTAGGAAATGCAGATCAGCCGGCCCGGCTGCTAAAACACACACACCAACACACACACAAACACACACCCCTCCCCTCCTCTCCTCAG	2243:41:+
smaw_01_2260500	C01	2260500	322	-	A	G	AGTCGAGTCAGATGCTCAAAACAGTTACTGTTGAGGAAGATGGCTTGTAGAACGGGCCTGTCTGAACACAGGAACATGTCCCTGANNNNNNNNNNNNNNNNNNNNNNNNNNNNNNNNNNNNNNNNNNNNNNNNNNNNNNNNNNTAATAATGGCTGAGGTCTTTATCGTTGAAACCCTACCGAGCATGTGTACTTGCAGCGCCACAAATCGGCTCTCCCAGTGTCGGCCNNNNNNNNGCACTCGCCCCTTGGCCTGTTGCTGCTGCTGTTGTTGCTGCTGTTGTTGTGGCTGCTGTTGTTGCTGCTGTTGTTGCTGCTGTTGTTGCTGCTGCTGCTGCTGGGTGG	2246:322:-
smaw_01_2263403	C01	2263403	15	+	C	A	AGGTATTCAAGGAGCGGATTGGTTATAATCATCTGTACGAAGTGCTCATCTCACTCGGCCAACCATCGCGACACCTCCTCAAAGANCTGATGAACATGGTGAGAGAAACATTGTCTCTGCTGCTCGTTGACCTCTTGGACCTGCCGTTCTTTCATACCTTGTGTCTGTATCNNNNNNNNNNNNNNNNNNTCACATTTGTCTTGTGTAGGCGGTGGAGGGCGAGCACACCTCAGTGGGGCTCCTGGGCATAAGTAACGTGGAGCCCTTGCTACTGCTGG	2248:15:+
smaw_01_2268833	C01	2268833	7	+	A	G	ATACACATTCACACTCTCTCTCTCTTCCTCTGCTCAGTTGTTTGAGCGCATGTTGCGCTGCGACCGCGTCTACGACAGGAACAAGNNNNNNNNNNNNNNNNNNNNNNNNNNNNNNNNNNNNNNNNNNNNNNNNNNNNNNNNNNNNNNNNNNNNNNNNNNNNNNNNNNNNNNNNTCCTCAACCAAGTCCTCCACACAGGTCAGCGTCCGAAGTTCTTAAACAGCTCGTCTCTTCCTTTTCCAGTAATGTTAACACAACTTTTAAAGTGTGTGCGTGCGTTTCAAATCTACAGATCAAGTGGTGAACTACAAGGACCTGATGTCTCTGGTGCAGC	2257:7:+
smaw_01_2269487	C01	2269487	139	-	C	A	CACTGACGGTGTCGGCGCTGCGCAGCGCCAAGGACCCGTCACCCCGCAGGTACAGCCGCATGAGCGTGTCCTGCCAACACTGCTGNNNNNNNNTCTGCACGGCAGCATCCTGTTGCGATTGTAGCAGCTGGTAAACCTGAAGACAGAGGAGGAAATGTATTTTTGAAGTATTTTTCTCATTTGAATTTTACC	2260:139:-
smaw_01_2273926	C01	2273926	160	-	T	C	CGACCCAGATCAAAGCCTGGGCAACAGTACAAAGAGAAGAATACACGGAAACAAAGAGGTGTGAGAACATATCCCATCTACATATNNNNNNNNNNNNNNNNNNNNNNNNNNNNNNNNNNNNNNNNNNNNNNNNNNNNNNNNNNNNNNNNNNNNCTCACCATTTTGGTTCTCTAGGAATTCTGGGAAGTAGAAGAACTCAGGGATGAGCTCCTTGACGTCGTTGGGGTTGTCAATGAGCGTCTGCCACGTCGCCGGGAT	2270:160:-
smaw_01_2290762	C01	2290762	65	+	G	A	GTAAATGGTCAAAGGTGTGATTGGAGATGCCACTTTTCTCTGAACAGGTGGAAGTGTGAGCAGCGCGGCGCTGGCGACACCCACTNNNNNNNNNNNNNNNNNNNNNNNNNNNNNNNNNNNNNNNNNNNNNNNNNNGTTTATTGAAGCTTCAGCGTTCACTATCTGCTCCTTCCTTCTTCCTCTCTGTGTCGCCTTTCTTTCCTTCTTCCTCCAGTTCATGNNNNNNNNNNNNCTGGTTCCTTCTAAAAACTTCTCTTCCCCTCTTTTTTTCTCTCTCCTCTGTTTCTCACTAGCATATCTTGCTTTGGAGCCCTCTTNNNNNNNNNNNNNNNNCTCTCAGAGCCTCTCCAAAGGTATCTCACCCTGTTCTGCTCTGCAACCCCTCCTCATTTAGCTCTA…	2287:65:+
smaw_01_2293215	C01	2293215	245	+	T	A	CGTCCAAAGATGCTCAGAGGCAGCTCACAGCAGAGGTACCGTCCCACACATCATTACACCCATACCTGTTACATTTCTACTGGTCNNNNNNNNNNNNNNNNNNNNNNNNNNNNNNNNNNNNNNNNNNNNNNNNNNNNNNNNNNNNNNNNNNNNNTGCTTGTGTGTGTGTGTGTGCTTCAGTTGAACGAGTTGGCGGAGAGGAACGCCGAGTGTGTGGAGATGCTCCACGAGTCTCAGGAGGAGATCAGAGAACTCCGC	2294:245:+
smaw_01_2295134	C01	2295134	9	+	G	T	CTGAGCCTGGGCGACTGCTTCCCCCCTCGACGCCCCTCGGTGCCGACCAGCAGCCTGGCCAAGCTGGTGCTGGAGAGGGGTATTTNNNNNNNNNNNNNNNNNNNNNNNNNNNNNNNNNNNNNNNNNNNNNNNNNNNNNNNNNNNNNNNNNNNNNNNNNNNCCAACACGCCCCCCAACTCCCCCTCCCACTCCCCTGCTCCCTCTCCTGTGCCCATGGAATCACGCCAGCACCCTGCCGACAATTTCNNGGCCTCCCGACCGGCCGAGCTTTTTCTCCAGGACGTTTACGGCTTGAATCTGGGCCGCGCCCCGCACCCCGACCTGCCGAGCCCC	2302:9:+
smaw_01_2295805	C01	2295805	256	-	A	T	TAAGGCCTTAACATCGAGCGCCGTAGCAAACATCTACACAGACACTGTCGGCGTCGCTAAAAACAGTCAGCTTGGTTGGATTGTGNNNNNNNNNNNNNNNNNNNNNNNNNNNNNNNNNNNNNNNNNNNNNNNNNNNNNNNNNNNNNNNNNNNNNNNNNNNNNNNNNNNNNNNNNNNNNAGGAGGGAGGTGGAGGTTCATGTGTCTTCCCAGCTCATCCAACTCCTCTTCAGCGCTTGGCTGAGCCTGATGGGATATGGGAGACGGTGGCG	2303:256:-
smaw_01_2299392	C01	2299392	211	-	C	T	ATCTCTTTCATACATCTTAAAGAAATGAACCCCAGATCATAACCCGACCTTCATCTAACATCTAAACAGTGAGGGAGACCAACTCNNNNNNNNNNNNNNNNNNNNNNNNNNNNNNNNNNNNNNNNNNNNNNNNCAGGACCAGTCAGAACCAGGGACCCAGTCCGACTCCCAGCCGCAGAGAGTCCCAGTCCCTCTGGAGCAGGTCCAGTCGGAACCAGGCTGCTCCNNNNNNNNNNNNNNNNNNNNNNNNNNNNNNNNNNNNNNNNNNNNNNNNNNNNNNNNNNNNNNNNNNNNNNNNNNNNNNNNNNNNNNNNNNNNNNNNNNNNNNNNNNNNNNNNNNNNNNNNNNNNNNNNNNNNNNNNNNNNNNNGTCTGTGTGAACCATCTCTCTGTTGTGTCT…	2309:211:-
smaw_01_2306240	C01	2306240	38	+	A	T	CAAACCCACCTCCATCTAGGGAACCAGACGTTAGCAGAAGAAGCCAATTAGCAGAAATGCTCGAAGCCTGTATTCTCTGGAATCANNNNNNNNNNNNNNNNNNNNNNNNNNNNNNNNNNNNNNNNNNNNNNNNNNNNNNNNNNNNNNNNNNNNNNNNNNNNNNNNNNNNNNNNNNNNNNNNNNNNNNNNNNNNNNNNNNNNNNNNNNNNNNNNNCGTCGTAGTTGTCGGCGGTGAAGTTGGGGTGTCCGTAGGGAACCAGGAGCAGCTGCCCGTAGGAGTGGATGGTGAGGAAACACAGGAAGTCGTCCTTCCGGCTTCCCACAAAGTCAGTGACGGCCTGGGCCT	2320:38:+
smaw_01_2320345	C01	2320345	154	-	G	A	ACAATTCACTCGGGGTCCTTTGACTCCCCTCAGGCGTGACAGCTGTGCTCAGACCCTCAGGCGTCCATAGATACATCACAAAGGANAGGGCGGCGGTCCCCTCGGAGGGGCTGGCGGGCGCTGTGACCCGTGGCCGAGAGATCGACACTTGCGCGTGTTTATTTAACCTCTG	2336:154:-
smaw_01_2321264	C01	2321264	17	+	A	T	TCAAATGTGTTTTTAAACATTATTGGGAAACGGATTTGAGACCAGGAAAACAAAAATGGATGCATCATTTATGCACTATTACTCANNNNNNNNNNNNNNNNNNNNNNNNNNNNNNNNNNNNNNNNNNNNNNNNNNNNNNNNNNNNNNNNNNNNNNNNNNNNNNNNNNNNNNNNNNNNNNNNNNNNNNNNNNNNNNNNNNNNNNNNNNNNNNNNNNNNNNNNNNNNNNNNNNNNNNNGTCTTTAATCAGCGGACTCAGTCGGCGCAGCACACGGCTGGCCCCGACCTTGTCCTGTCAGATACTCTCATTCTCAAACCGACTCGCTGCGACAGGCCCGGTGTGAGTGGAGGGGAACGTCCCAA	2339:17:+
smaw_01_2325115	C01	2325115	78	-	G	A	TGAGCGTCTGTGTGTCATTTTGACAGGTTTGATGTCATTGACTGGGAATTAAGTTTTTATTAGGGGACTTAATGACTCAATGACTNNNNNNNNNNNNNNNNNNNNNNNNNNNNNNNNNNNNNNNNNNNNNNNNNNNNNNNNNNNNNNNNNNNNNNNNNNNNNNNNNNNNNNNNNNNNNNNNNNNNNNNNNNNNNNNNNNNNNNNNNNNNNNNNNNNNNCTTCGAGCGCTCGTGACAAATGCATTCTCTGAAGAAACTGGGTGGACTGATTGTCAGAGGTTCGTTGAGCCTCCAGAATACTTTTNNNNNNNNNNNNNNNNNNNNNNNNNNNNNNNNNNNNNNNNNNNNNNNNNNNNNNNNNNNNNNNNNNNNNNNNGTGATTCAAACCTAGACCAATGAA…	2344:78:-
smaw_01_2326713	C01	2326713	198	-	C	G	GTAGAATGGGCTCATTATAATTTGGCCCAGCGCAACTCCACAAACCATTTGTCATGGCACGGGAACGTGTAGACGAGCCGCTCAGNNNNNNNNNNNNNNNNNNNNNNNNNNNNNNNNNNNNNNNNNTGGAGCCACATCACTCATTTGGAAAACCTGAGTGGTTCCTCAAACCTCAGGTCTGATAGCAGGTTGTGCACGTTCGCACCGAAGGNNNNNNNNNNNNNNNNNNNNNTATAGCACCGACAGCTGCCTGAATTTGAATTGATGACACCGCTGCAGGTAGCCGACGACAGCCCGGGGAAATCCGTCCGAGGGAT	2351:198:-
smaw_01_2334071	C01	2334071	44	+	A	C	TGATTACTGATCCGACCCGTCGAACCACCGACCTCGCTCTGCAAAACCCCTGAGGCCTAATGTTTAAAGCCGCTACAGTATTTACNNNNNNNNNNNNNNNNNNNNNNNNNNNNNNNNNNNNNNNNNNNNNNNNNNNNNNNNNNNNNNNNNNNNNNNNNNNNNNNNNNNNNTCAAAGTACGACGCGTCAAAATGACACATCACATCCAAAATGGCAGACTTCCTGTTGGGTTTGGACTACGGTCATTTTAAGTCGA	2360:44:+
smaw_01_2351462	C01	2351462	250	+	C	T	TAAATGCTACCGCTGACGTCTCCTTCCTCCCGAGTCTCCTCCACCATGTTACAAACTGATTCAACCTGCAAAACAAGTCAATACCNNNNNNNNNNNNNNNNNNNNNNNNNNNNNNNNNNNNNNNNNNNNNNNNNNNNNATTTATTTTGAAAATGTACCTACAGGAAGCTGATTTGTGCAGCTGCTCTCTGGCGGCAGGAGGCTGCTGTTGGGACCATGTGAACNNNNNNNNNNNNNCGTCCTCTGGCTTCGCAGAGACACTTTGTCCGAGTCGCCCGATCGAGCGCATCTCTCTTGCTCCTCGCCACTCCTCATCAGAGACT	2378:250:+
smaw_01_2351605	C01	2351605	219	-	G	A	ATCTCAGGACCAACGACCACATTCTGATCCTGAAGGAGGTTTGTGTAGATGAAGATCACTTTCGTGATGCCAAAGTGATGGCACGNNNNNNNNNNNNNNNNNNNNNNNNNNNNNNNNNNNNNNNNNNNNNNNNNNNNNNNNNNNNNNNNNNNNNNNNNNNNNNNNNNNNNNNNNNNNAGCGTCCGCTAAATTCCACTGTATTCTGAAGTCTTTCGTGTCTGTGTGTCTCAGGGTCACGTCATGGCGCAGGGCTCCCACAGGGAGCTGCTGTCCTCC	2380:219:-
smaw_01_2361731	C01	2361731	60	+	A	G	TGGCTGCCAGAGCCCTCGCTGCTCTCCAGCACAGGCACAAGTGTGGAACACGCATGAGCAAACACACTCGTGTTAGAAAGACAGANNNNNNNNNNNNNNNNNNNNNNNNNNNNNNNNNNNNNNNNNNNGAGCTCTGGACCCAAAGACGTCAACTTTACCCCAGAACTGCTCCGATGATCGTTCCTGCCACCAGCCCTCTGAGGCCCAGGTTCAGT	2386:60:+
smaw_01_2367695	C01	2367695	138	-	C	A	TCAGTGGCCGTGGAGGAAGAAGGAGTCCAGGGGATTCTTCAGAGGCTCACGGTCGGTCTGGTTGATTTACCTTCATCTCTCAGACNNNNNNATCTCCACCGTCTGCATCTGCTGATCTGTCTCTGTTCCGTCTGGTTGACAGGACGAGTCCAGAGCGAGACCCGCTGATCATTCTGNNNNNNNNNNNNNNNNNNNNNNNNNNNNNNNNNNNNNNNNNNNNNNNNNNNNNNNNNNNNNNNNNNNNNNNNNNNCGAAGCCACAACATATCGCTCACTCTTGTCCCTGTGTTGTTGTTTGATTGATCGCTGATCATGTTTGTCTTTCCATCAGGATACA	2394:138:-
smaw_01_2380284	C01	2380284	246	+	T	A	ACGAGACTCCAGAGAGAGACGAGGAGGACGGCAGAGTAACAGCTATTGATTTATCAGCCACCGTCTCCCTGGAAGATCTGAGCGGNNNNNNNNNNNNNNNNNNNNNNNNNNNNNNNNNNNNNNNNNNNNNNNNNNNNNNNNNNNNNNNNNNNNNNNNNCCAGCTGTCGCCATGACGACGTCCAACTTTTCCATCAACGTGTGGCGTGCGGATGGCGAAGAGGAGTGAAGGGGATTCACGGTGCGTTAGTGTGTCAGCGTGTGTGTGGTTCACGGGAGCTGCTGTCAGACAGAAGAGTCCCAACTGTTCCTGAAGTTTTCACCTTGCTCCG	2404:246:+
smaw_01_2383854	C01	2383854	336	-	T	A	CGAGCTTCTCCATGTGCGTCACGCGCTCCACGGACGGCGAGACGAGGCAGTACAACCTGGGGCAGCTCAGGTGAGGGACAGACAGNNNNNNNNNNNNNNNNNNNNNNNNNNNNNNNNNNNNNNNNNNNNNNNNNNNNNNNNNNNNNNNNNNNNNNNNNNNNNNNNNNNNNNNNNNNNNNNNNNNNNNNNNNNNNNNTGAAGCGAGGTTGATGGGAATATCCAGGGGATTGGAAGGGAAAACGTGGAGGGATGAACAGAGGATGAGTGGGCGAGATGAAGGCAGAGGGAAAGATCTGGGACACCGCAAATGAGAGATGGGGAAAGGAACTGGTCACATCCTGGGAAATGAGAGGAAGGAATTCATCCGGGAAAGACCTCGCAAAAGTCAAGAGAGGTGAG…	2407:336:-
smaw_01_2390839	C01	2390839	186	-	G	A	AGAGCTGCTGACAGGCTGCGGAGCGTTCGGCTTTAGCTCAAGTAATCAGGGCCAACGATTCTACGGAGAGAGAACGAGAGGGAGANNNNNGGAGGCTCAGCACAAATCCTGGTGTGTGTTTGATTTAGCATTCTGGTCTCACATATGCTGCTGTGTGTGTGCGTGTGTGTGTGTGTGTGTGTGTGCGTGTGCGCGCGTTAGTCTCGTCTCGGGACTTAATCAGAGTCTTGGCTGACAGA	2411:186:-
smaw_01_2400407	C01	2400407	7	+	G	A	TGGAACGACGGCAGCACCAGTCACAAGACACGTCGGGACACGAGGGAACATGACATGTCACTGTGGAAGTTTTGGGCCTCGGTCANNNNNNNNNNNNNNNNNNNNNNNNNNNNNNNNNNNNNNNNNNNNNNNNNNNGTCACAGAAACAACAGCAGAGCAGAGTCTCTGCGAAAGTATCTGCTTCTTACTGACTAACATGCGCCGTTAACAGTCTGATCAACACGGACTCCGAACCGGGTTTGATTCACATTTGGCCTTTACCTTTTGCATTTATGTGCTGGTGTTGCTAGGC	2427:7:+
smaw_01_2441703	C01	2441703	17	+	C	T	GATGTCATTTATTAAACATAAACAAGCGAAACACGTGCAGCCTGCGAAGCCTAACGTCTCAGTGTGGGACGATCCGCTCGGTCAGNNNNNNNNNNNNNNNNNNNNNNNNNNNNNNNNNNNNNNNNNNNNNNNNNNNNNNNNNNNNNNNNNNNNNNNNNNNNNNNNNNNNNNNNNNNNNNNNNNNNNNNNNNNNNNNNNNNNNNNNNNNNNNNNNNNNNNNNNNNNNNNNNNNNNNNNNNNNNNNNNNNNNNNNNNNNNNNNNNNNNNNNNCAAAAGACAGATAAAAGAGTAAAGAGCCGCTGCCTCTACGCTTCCAAACCAATCATCATCACCATCATCACCATCACCTTTCCTC	2464:17:+
smaw_01_2454214	C01	2454214	255	-	T	C	TACTGAACCAACACAAAACAGTCACAATAAAGACTCAATAAACACAACACAAGTTTCATATTTAAAATACAGTCTATGTCTGCATNNNNNNNNNNNNNNNNNNNNNNNNNNNNNNNNNNNNNNNNNNNNNNNNNNNNNNNNNNNNNNNNNNNNNNNNNNNNNNNNNGTAGTGTCGGATCTTCTGGTCCTCGAGCCAAACGACGCAGTTCCTGAACTGAGTCTCATCTGAGCCCAGAGGGAAGAGAGAGACAGGGAACAACGAGGCGGAGTCATCCATCAGTAGGAGGCAAAGCAGGCAATTA	2478:255:-
smaw_01_2460062	C01	2460062	298	-	G	T	TGAGAATCAGTGTGGTGTAATAAGCAGCCCACACACACTCCACCCAAAAAACCTCTGTTATGACTCTGCTGAACAAATTTTTTAANNNNNNNNNNNNNNNNNNNNNNNNNNNNNNNNNNNNNNNNNNNNNNNNNNNNNNNNNNNNNNNNNNNNNNNNNNNNNNNNNNNNNNNNNNNNNNNNNNNNNNNNNNNNNNNNNNNNNNNNNNNNNNNNNNNNNNNNNACACGGGAGGACCTGAGGTCAAAGGTTGCACGTTGCTCAGAGTAACCTGACCGTGACCTCATCAGCACGAGACAGCCACTCCCCT	2482:298:-
smaw_01_2472780	C01	2472780	276	-	G	A	CACATGTGCCATGTTCTTTTTCTGTCAGCGCCCAGTGGTGGAGCTTTCTTTACCCACTGGATGTGATGAGAACCAGATAGAGACANNNNNNNNNNNNNNNNNNNNNNNNNNNNNNNNNNNNNNNNNNNNNNNNNNNNNNNNNNNNNNNNNNNNNNNNNNNNNNNNNNNNNNNNNNNNNNNNNNNNNNNNNNATTCAGCCCAAGTTTCTGTCATTTGAACGTCAACACGTTGATTAAAAAGGTTACGATGACACATCTCGCACATGCACATGAACAC	2495:276:-
smaw_01_2480553	C01	2480553	167	-	T	A	CATGCTGGATATGATTGGTTCTTTGCGGCTGGACTACAGAATACATCCACATTACTTTGTTGTAGTTTTTCCTGCCAGCCCCCAGNNNNNNNNNNNNNNNNNNNNNNNNNNNNNNNCAGCAGGAAAATCTCCTGGAAAATTGCCTGAGCAAGTTGACACTCCACCCAGGCGCCGCCCCCTCGGAGAATCTCCTGCTGTTGTTTACCCTTCTGACCGGGACAATGTTCTGTTGCGTTGTTCTCATGTGAACGGCAAACTGGAAAATATCCAGATA	2507:167:-
smaw_01_2482118	C01	2482118	174	+	A	G	CCAGTTGCCAGCCTCACCAGAGTGCTACGAACGGAACTGCCTACAGCGTGGGAACTGGCACACACACACACACACACACACACACNNNNNNNNNNNNNNNNNNNNNNNNNNNNNNNNNNNNNNNNNNNNNNNNNNNACGGTCCAGGCTTGCGGCCAGGAACAGTCCAGTCAGTATTTCGCTGTTGTCATATGAAAATCCATGCGCTCTTATCCCCCCCCGCCCTGTTGAAAC	2509:174:+
smaw_01_2491181	C01	2491181	42	+	G	A	TGCTCAAAAGCCAGTTTTCCCAGAGACTCGATCATCTTCCTGCTCTCCAGACTCCAGTGTTGATCCGCCTCAGCTCCTCCGTCGTNNNNNNNNNNNNNNNNNNNNNNNNNNNNNNNNNNNAAGTGGATGTACATCTCCGTCAGGGTCTTGGGCAGCTCCCCTCCCTCTCTGGTTTTCAACACATCCTCCAGAACTGTGGCTGTGA	2521:42:+
smaw_01_2491705	C01	2491705	165	+	C	G	GCGTGTGGTTATCCAGAGGCGAGCAGACGGCAGCAGTTTCCCCCTGATGAGGTTGGTCAGCAGCACGTCCACTGAGGTGGAGGCTNTGGCATCGGTCAGGATCTCAGCGTTGTCGAAGTCCAGAGGAAGTCGACACTCGTCCAGACCGTCAAAGATGAACACGACCTGGAANNNNNNNNNNNNNNNNNNNNNNNNNNNNNNNNNNNNNNNNNNNNNNNNNNNNNNNNNNNNNNNNNNNNNNNNNNNNNNNNNNNNNNNNNNNNNNNNNNNNNNNNNNNNNNNNNNNNNNNNNNNNNNNNNNNNNNNNNNNNNNNNGTCTTCGGCCCAGTCCAGAGTGAACTTCTGCGTCAGGACAGTTTTCCCAATGCCAGCCACTCCCTTCGTCATCACCGTCCTGATC	2522:165:+
smaw_01_2492234	C01	2492234	57	-	T	A	GCGGTACGGAGATTTCTCTCACAGACAGTGAAATGATCACATAGTTATATTTATGAATAACTCTTTGATATGGTTCATTTAGGATNNNNNNNNNNNNNNNNNNNNNNNNNNNNNNNNNNNNNNNNNNNNNNNNNNNNNNNNNNNNNNNNNNNNNNNNNNNNNNNNNNNNNNNNNNNNNNNNNNNNNNNNNNNNNNNNNNNNNNNNNNNNNNNNNNNNNNNNNNNNNNNNNNNNNNNNAACGGCGAACATGAGGTCAGACAGATTGAAACAGCGTCCAGGAAACCAGACCGACCAGAAACAACCGTCAGACAGGAAGACATCT	2523:57:-
smaw_01_2504373	C01	2504373	267	+	C	T	CATAAAAACATAAAGGATGATTGGTATGAATGATTATGTAATGAAGTTAAGTTTGAGTCCAAATGTTGGCACCTCCAAGTCAAGANNNNNNNNNNNNNNNNNNNNNNNNNNNNNNNNNNNNNNNNNNNNNNNNNNNNNNNNNNNNNNNNNNNNNNNNNNNNNNNNNNNNNNNNNNNNNNNNNNNNNNNNNNNNNNNNNNNNNNNNNAAAGAGATGGTGGGTGTACCAGAACACCTCGAAGTACGACCTACGGATCACCTCCATGGACGACGTGATGATGAGGATGAGGGCGAGCGTGATCGCCA	2529:267:+
smaw_01_2562254	C01	2562254	23	+	C	T	CAGAAAAAGAGGTTCCTCTTCTCTTTTCTTTTGCTCTAGACAGAAGACCATCTGATGATTAACATTGACAGTGAAGGCAACCGTANNNNNNNNNNNNNNNNNNNNNNNNNNNNNNNNNNNNNNNNNNNNNNNNNNNNNNNNNNNNNNNNNNNNNNNNNNNNNNNNNNNNNNNNNNNNNNNNNNNNNNNNNNNNNNNNNNNNNNNNNNNNNNNNNNNNNNNNNNNNNNNNNNNNNNNNNNNNNNNNNNNNNAGGTTTTCATTAGTATGAAGTCAACAATGTGATGAGTCCAATGAAGTATTCGACGGCAGTTGGGACGAACTTACCCTCCCGACAG	2586:23:+
smaw_01_2563997	C01	2563997	37	-	G	T	AAAACACAGTGGCTGACTGTGTCTGAACCAACACTACAACACACTGGCTTTTATTTTGAAAAGCGAGTAAAGTCCACAGCAGCACNNNNNNNNNNNNNNNNNNNNNNNNNNNNNNNNNNNNNNNNNNNNNNNNNNNNNNNNNNNNNNNNNNNNNNNNNNNNNNNNNNNNNNNNNNNNNNNNNNNNNNNNNNNNNNNNNNNNNNNNNNNGCGGGACGACAGCGAGGAGCTGAGCACTCTGGGAAATATATACACGAGGAGACGAACATGCAGTCGATAATAGCGAGGAACGGGTCC	2590:37:-
smaw_01_2585250	C01	2585250	1	-	T	C	AGCTGGAGGAGTCTCACGTTCAACTCGAGGAGCTTTTCCACCAGAGGAAGATCCGACTGGATGTTTACTTGCAGCTCCGTATCCTNNNNNNNNNNNNNNNNNNNNNNNNNNNNGGTTCTTAATTTACAAATAGTATCAAAAACATTTCTTGAACTTCCTTCCTCGGCAGTGGATCAAGGTTGAACTGCGTCTGTGCGTGTCTGTAGGTGACCGGGGAAATATACGCCTGGAAGCAGGACCTCCAGAAACAGTCCCAGGACTTCTCCACTGAANNNNNNNNNNNNNNNNNNNNNNNNNNNNTAAACCAGGACAAGCTAGCCCTGGGCCAATCACGATTAGTGGAGGCCAGCCCCGAGGCGCTAACACTAGCGCAGCAGCGCATCCA	2614:1:-
smaw_01_2588747	C01	2588747	54	+	T	C	CGCTCCAGCAGAGACGAGACCTTGGGCGCCACGCTCTGGAAGTCCGCCCCGCCTGACAGCCAGCTGCTGTGGCTCCCACCACCGCNNNNNNNNNNNNNNNNNNNNNNNNNNNNNNNNNNNNNNNNNNNNNNNNNNNNNNNNNNNNNNNNNNNNNNNNNNNNNNNNNNNNNNNNNNNNNNNNNNNNNNNNNNNNNNNNNNNNNNNNNNNNNNNNNNNNNNNNNNNNNNNNNNNNNNNNNNNNNNNNNAACTCCACAATGTAATAAATTATTTAATAGTCAATAAGAGGCTCCGTCTTACTTGCGGGCCTCGTCCACGTCCTGGGGCTCTGGANNNNNNNNNNNNNNNNNNNNNNNNNNNNNNNNNNNNNNNNNNNNNNNNNNNNNNNNNNNNNTGAACTC…	2620:54:+
smaw_01_2599491	C01	2599491	219	+	C	T	GAGGAGGTCAGAGGAGGAGGGAGGAGCAGAGGAGGGAAGCTCTGCTGGCTCACACACACACTCAGCTGGAGCTGCTCAGAGGTACNNNNNNNNNNNNNNNNNNNNNNNNNNNNNNNNNNNNNNNNNNNNNNNNNNNNNNNNNNNNNATCTGAGTTTGTGAGCGTGGACAAAATGTTTGACTGACGACAGCCATCCTCCCTTTTCCCACAGATGCCCCGCCCCTCTCCGTCGTCACAGCAACAGTCGCGGACTCCTTCCTGAGCCCCTCGGGTCCCTA	2638:219:+
smaw_01_2601403	C01	2601403	48	-	G	T	AGTCGTAGTGCAGTTTGGAGCAGATGTAGTACAGTTTACAGTACTATCTGTTACCTCCAGGCGTCTGATGGTCCAGCACGGAGCANNNNNNNNNNNNNNNNNNNNNNNNNNNNNNNNNNNNNNNNNNNNNNNNNNNNNNNNNNNNNNNNNNNNNNNNNNNNNNNNNNNTGGGCATGGTCACACTTCGGGGCATGCTGGGTAAACTGGGAAAACTGGGTAAACTGGGTAAAGTGGGCAAAGTGGGCAGGTTGGGNATGGTCACGCCTCGTGGTAAACTGGGCGAGCTGACCCCTCTGGGTAGCGATCCGAACAAGGCGGGCATGCTGGGAAACCTGGGGAGCGTCCCTGGCAT	2641:48:-
smaw_01_2604085	C01	2604085	226	+	A	T	TACGTTGTCATAGCGATGGAGGCGTTGGAGCAGCTGCTGTTGGCCTGTCACTGTCAGAGCATCAACCTGCTGGTGGAGAGCTTCCNNNNNNNNNNNNNNNNNNNNNNNNNNNNNNNNNNNNNNNNNNNNNNNNNNNNNNNNNNNNNNNNNNNNNNNNNNNNNNNNNNNNNNNNNNNNNNNNNNNNNNNNNNNNNNNNNNNNNNNNNNNNNNNNNNNTAACAATTTAAAAAAATCGGTTTGGTTCCAAGCTTAAAACTCTTTATAGAAGGATTTTATGAAACGTCAATGGAGTCGAGTAAATCGGAAATTCAATTCCGGAACCAAAGCCGTTCTAAAAGTGGGCGGGGTCAGTGTTGAGCTAAATTATGCTGTTCCCGACTTTTGT	2645:226:+
smaw_01_2605312	C01	2605312	217	-	G	A	AGATGATTCAGGTCCAGTTCAGGTATTTGGAAGGACTGTTCGGTCTCATCACACTCCAGACCACGCACAGGTGAAGACGCAGGTTNNNNNNNNNNNNNNNNNNNNNNNNNNNNNNNNNNNNNNNNNNNNNNNNNNNNNNNNNNNNNNNNNNNNCCTCTTCCTCTCCCTCTACCTCTTCCTCTTCCTCTACCTTTGTCTCTGCCTCTACTTCTGTCTCTCTCTACCTCTAACTCTACCT	2648:217:-
smaw_01_2607615	C01	2607615	15	+	T	A	AGTACAGCACATACTCTGTAGTAGTACAGTATTTACAGCATGTATTTTGTCACCAGGCATCTGGACAGTCACAGACTTTGGGAAGNNNNNNNNNNNNNNNNNNNNNNNNNNNNNNNNNNNNNNNNNNNNNNNNNNNNNNNNNNNNNNNNNNNNNNNNNNNNNNNNNNNNNNNNNNNNNNNNNNNNNNNNNNNNNNNNNNNNNNNNGAGAGGTTTAAACTCTGACGTGTCGTCTCCTCAGTCCCAACACTCCCACCTGGTGATCCAGCAGCTGTTGGGTCACCTGGACGCCAACAGTCGCAGTCCGG	2654:15:+
smaw_01_2609026	C01	2609026	132	-	A	G	ATTGTCGTACCTTCCTCATGAACAGGACGTCCTGCCGAGAGCACGAGTCGTCCTTCAGCTCCAACACTGACACATCAAACGTCACNCTGTGGACACACACACACACACACACACTTTAAAACCAGTGTGTGTGCAGTAACACGAGTCGGTCTGATCTGTGGTGTGTGTGGTGTTTGTGACCTGGCCGGGTGGAGTCTGGC	2658:132:-
smaw_01_2623889	C01	2623889	249	-	C	T	GTGCTTTGAAGAGCTTGAAGGGCGGGAAGGCGCCAGGCAATTTTACGAAGCTTTCTGGGACATTTTAAAAAACGATGTTTTAGAANNNNNNNNNNNNNNNNNNNNNNNNNNNNNNNNNNNNNNNNNNNNNNNNNNNNNNNNNNNNNNNNNNNNNNNNNNNNNNNNNNNNNNNNNNNNNNNNNAAAATTGGCGCCCTGTTTCTCTCCTGTGCACGGACTATAAAATCCTCTCAAAAGCATTGGCCAATCGGCTGAGGGAAGCCATGGAGCAGGTTATTCACCGGGACCAGA	2669:249:-
smaw_01_2625837	C01	2625837	243	+	A	C	AGAAGGACAGAGAAGGAGACACGTGATGAAACAGTCATGGTATAGTAAGGTTTACAAACTACAAAGTGTCATAGTATAGCATGGTNNNNNNNNNNNNNNNNNNNNNNNNNNNNNNNNNNNNNNNNNNNNNNNNNNNNNNNNNNNNNNNNNNNNNNNNNNNNNNNNNNNNNNNNNNNNNNNNNNNNNNNNNNNNNNNNNNNNNNNNNNNNNNATGAAAGTTACTGGACATTATACATTTTATAATCACAAAGGCAAAAATATTAGGATAGAGTAAAAAGAGGTCAACAGAAGACGTC	2673:243:+
smaw_01_2636450	C01	2636450	257	-	T	C	CGAACAGCCAGCTCTGGCAGCTGCGGCTCCCACAGCTGGTGTCCCAACGGCACGAAAAGGAAAAGGAAAATAGAGGAGGAGAAGGNNNNNNNNNNNNNNNNNNNNNNNNNNNNNNNNNNNNNNNNNNAACCCAGGTGTATAATTTACACAGGAAGGGAAGAGCAACACCTGAGCCCCCGTCTGCCAGGAGGCAAGAGGCAGCTTGTAGCTGGNNNNNNNNNNNNNNNNNNNNNNNNNNNACGCCGCTGAGGCTGGAAATGTTCAAATGTCCCTTTTTGCTGCTACAGAAAAACAGTTGTTTGCTCAAAAATGATTGTTGTTGTCGCC	2682:257:-
smaw_01_2658141	C01	2658141	202	-	G	A	CCAATTAATTCACTATTGGATGTATTTTTAATTCAAACTTAAAATGCACAGAAATGAATGTGCTGGTTGAGATGGACATTTCCAGNNNNNNNNNNNNNNNNNNNNNNNNNNNNNNNGCGGCTCGCCCGAGCACCGCTCAGCACCCATGTCACGACCCGTAGCGCCGACGGCAACTAATCTGTGATTCCCCCTTTTTCTCCTC	2697:202:-
smaw_01_2665034	C01	2665034	241	-	T	C	CCGTCATTCAGCCTGCATGCAGACCAACCCACCCCCATGAAGTGGTAAGGACATGGGGCAAAACAACTGTAACGCTGCTGTCTGCNNNNNNNNNNNNNNNNNNNNNNNNNNNNNNNNNNNNNNNNNNNNNNNNNNNNNNNNNNNNNNNNNNNNNNNNNNNNNNNNNNNNNNNNNNNNNTAGAGCAGCAGGAGGCAGGACGTGATGTTTTCCTCCTGTATTCTCACATGGGCTCGCTTGAAACAGTGTCACCAGGGGGCCGCCCCACTGGAAAGCT	2704:241:-
smaw_01_2667161	C01	2667161	154	-	A	G	ATATGATCGTGTGCCGCCGCCGATCAGCGCCCGCGGCGAGAGACACACAACCCACGCTCGCAGACGCCAAGACAGACGTCCAGACNNNNNNNNNNNNNNNNNNNNNNNNNNNNNNNNNNNNNNNNTCCTCGGTGAAATCAAACTGACGTTAATTGTATTTATCTCGGAGCTATGAAAGTCGGCGTGGAATAGCTCACGCTAAAAACTGATTTCAAGAATGGGACGAGAGCTCGAACGAAATTACGCCGGCGGT	2706:154:-
smaw_01_2672349	C01	2672349	69	-	G	A	AAACCGCAAACGGAATTAGCGGTGCGCCACCATAAAGTGTCCCCTGTCGGGGGCTCAGTTGGTTCAGGCTTGCAACTTTACCACCNNNNNNNNNNNNNNNNNNNNNNNNNNNNNNNNNNNNNNNNNNNNNNNNNNNNNNNNNNNNNNNNNNNNNNNNNNNNNNNNNNNNNNNNNNNNNNNNNNNNNNNNNNNNNNNNNNNNNNNNNNNNNNNNNNNNNNNNNNNNNNNNNNNNNNNNNNNNNNNNNNNNNGTTTCGGACACAGCTACCACATTACAGTCAAACTTCACAGACATGTGTATGGGCACAACACCACATCTGAAGGCAGAGCACACGC	2710:69:-
smaw_01_2677924	C01	2677924	141	+	C	A	GGGCGCGCGGCTTCCGTGAGCCGAGGACTTGATGCTCTCCTGATTTTTCTAATAACCGCGGGTCTGACCAAAGTGCTATAAGAATNNNNNNNNNNNNNNNNNNNNNNNNNNNNNNNNNNNNNGCTGACGGAGAGAAAGTGCGGCGGGGAAAGATAGAGACAGAAAAATGAAAGGGTGTGAGAGCAACAGAGTTAGGAGTCAGTTAAGCCATTTATGCAGCCGGCCGCGTG	2720:141:+
smaw_01_2705629	C01	2705629	124	+	T	A	GACAGTTCCAGAGACATTCTAAATAAAGAATAAACTGATTTTGTTGCACATATTATGAGCAGTTTTGTCTCCGTGTGTTGACATGNNNNNNNNNNNNNNNNNNGCTGTCCTCCATGCGCAGCTTCTCTCAAGGTGCTGTTCAGTCGGGCTCTGACCCCTCCACCTGCTCCGCTGCATCAGCTCAGTGACTGTCGATGCGAGCGCGA	2738:124:+
smaw_01_2712797	C01	2712797	284	-	A	G	TGCAGGGCCACCATGCACTAGCCTGCCACAGGGGCCTTTCAAACAAGCCTGGACATCGACGGAGACAATCCTTTACACTACACGGNNNNNNNNNNNNNNNNNNNNNNNNNNNNNNNNNNNNNNNNNNNNNCAGGTCAGCTCGACGAGCACACATTAGCGAGGTGCTCGCTGTGTCGCAGTTTGATACGAGCTGCATTGCCCGTAGAGATTTGTCTCTGTGTGATGGCACGCAGACACATTTAGCATATTAATGAGTTACAGATAGCAGACGTATTAGGCATTGTAATAGGACGCTGATAGGACCCCTCCCGAGTGAGCCCATGTCAGAATACAG	2743:284:-
smaw_01_2715493	C01	2715493	265	-	C	A	GAAGATGGAAACTGTTTTGAATGTGGCTGTGGTGTGAAGTGAACTTGAGATAAAATACCTCGTTAGCCACCGAAGATATTGAATGNNNNNNNNNNNNNNNNNNNNNNNNNNNNNNNNNNNNNNNNNNNNNNNNNNNNNNNNNNNNNNNNNNNNNNNNNNNNNNNNNNNNNNNNNNNNNNNNNNNNNNNNNNNNNNNNNNNNNNNNNNNNNNNNNNNNNNCAGTCGTTGAGGGTGGACGAGGTGAAGGGACTCAGAATAGACATTGATTAGAGATTGATTATCTATTGTGCTCGAATGCAAATGTGTCTCGTNNNNNNNNNNNNNTTTTGTGAATTGGACTGGATTTCCTTCAGCTTGCAGCATTCCTCTGCAATGACTGCCGCCGCCGCCGCGGCAGCA…	2748:265:-
smaw_01_2715980	C01	2715980	215	+	C	T	TGAGGGATAAGTCAAAGCCACAAGTGGAGCAGCTTTCACTGTCTGCTTTTAGCTCTTTCGGTTCGGGGTTCAGCCCTCGCCGACTNNNNNNNNNNNNNNNNNNNNNNNNNNNNNNNNNNNNNNNNNNNNNNNNNNNNNNNNNAGTCTCTATTCCTGACTGCAATGCACCAGAAGAAACTTGTGAAGCATGCTGCCTTTACTATGACAACTGGCACGCTGTCCTCACC	2749:215:+
smaw_01_2717703	C01	2717703	293	+	A	G	TTTCCCAGCACTCTCCACCCCCACCTCTCTCTTTTCCTTTCCCACTTTATCTCTTTTATCTCTCTCTCCTGGCTAACTGTTTCTTNNNNNNNNNNNNNNNNNNNNNNNNNNNNNNNNNNNNNNNNNNNNNNNNNNNNNNNNNNNNNNNNNNNNNNNNNNNNNNNNNNNNNNNNNNNNNNNNNNNNNNNNNNNNNNNNNNNNNNNNNNNNNNNNNNNNNCGCGGTGACTGTGGGTGCTTTTCCCGAGGGCCGCGGATCGAGATTGGTCTCCGAGAGTTGCCGTGAGTTTGTTGAGTTGAGCAGT	2753:293:+
smaw_01_2717788	C01	2717788	149	-	A	T	AGTGGTCTCCAGCAAGTACAGCATGTGAGTTTATTTAAGGAAAACAACCACATGTGAGTGTGGTCATGAGGGCAGCAGTTTGACANNNNNNNNNNNNNNNNNNNNNNNNNTCAGACGAAGCGAGGGGCGGCGCTGTGTGAGTGTGCCGTGGCGTGGGCCTTCAAGACGAGCGCTGTCCAAACTGTCAGTCATGATCCATGTA	2755:149:-
smaw_01_2742493	C01	2742493	60	-	C	T	CAATAAATATGTGGTGGTGGTGGTGGTGGGGGAATAAATAAATAGAATAATTCCCAATAGTTCCCTCAAAATTTTGGGAGTCTTCNNNNNNNNNNNNNNNNNNNNNNNNNNNNNNNNNNNNNNNNNNNNNNNNNNNNNNNNNNNNNNNNNNNNNNNNNNNNNNNNNNNNNNNNNNNNNNNNNNNNNNNNNNNNNNNNATCATCGCTCCTCAAAAAATCAATGGACTCTAAACAAGTCGGGTCGGACATAAATACCAAATCGCAATAAAAGACCTGTGGATGGATGTTGTTAACGCCGGCCCCC	2787:60:-
smaw_01_2748704	C01	2748704	23	+	G	A	TAAGCAATCAGAAAGCATGCACGGTAAACAGAACCAACAGGGATCTCCTCCAACAGGCTCTGATACGTTACCACCACCCACATGCNNNNNNNNNNNNNNNNNNNNNNNNNNNNNNNNNNNNNNNNNNNNNNNNNNNNNNNNNCGCACACGTATACTGCAATCCAATTAATTAGCGTGGATGAGTGATGTGTCCTTGGCTCGGCGGCAGCATGACCCTCCGTCCCTCTGCCTCGCTTTGCCTCTCGCACACCG	2799:23:+
smaw_01_2768103	C01	2768103	268	-	G	A	CTTCAGACCCTTTTGAATCACTCTATTTGGCACCAGCTATTGAATATGAGGACTTTATTATTACTTCTCCAGATAGCGTGCGCCCNNNNNNNNNNNNNNNNNNNNNNNNNNNNNNNNNNNNNNNNNNNNNNNNNNNNNNNNNNNNNNNNNNGACCAGACAGTCATTATTTCACTCCATCGCAGCGAATGTGGTGACGGTCGGCGCTAATGCAGTCTGCTAATGTCGCTGTAATAACTGCTGGCTTTCAGCGCAGACACATCGGTGACCCCTTTAATTCAATACACC	2808:268:-
smaw_01_2784748	C01	2784748	191	-	G	A	AGTTGTGCCTGAGAACATGATATCCCTGGGGTGCCGTAGCTCCGAAGAACATATGCCGCAGCCTCCAGCAGATTCTGAGCCGTCCNNNNNNNNNNNNNNNNNNNNNNNNNNNNNNNNNNNNNNNNNNNNNNNNNNNNNNNNNNNNNNNNNNNNNNNNNNNNNNNNNNNNNNNCATACAATGTATGTCAGCCAGACTGAATTCTCAAATGGTTGCGAATGCACAGAAATGCTCATACACCAACCTCCAGCATACAGAGT	2832:191:-
smaw_01_2794879	C01	2794879	164	+	A	T	GACACGACTGATCCCTCGGGAGTCCCCTCCCCTCCTCCCGCTCCTCAGGTTCTGAAGTTGCTGACGAGTTAAGGATCACTCAGCGNNNNNNNNNNNNNNNNNNNNNNNNNNNNNNNNNNNNNNNNNNNNCACACGCTGCACCCCTGTGGTGTTTTTCTCAGTTATGTTGAGATGCAGCGAAGCTCTCGGCCACACATATTTTCTCCGTCCTCGANNNNNNNNNNNNNNNNNNNNNNNNNNNNNNNNNNNNNNNNNNNNNNNNNNNNNNNNNNNNNNNTATTTATATATTCATGTCTGTGTCATTTTCAAAAAATTCTTGCCAAGACATTGAATCTACCATAAAACTTAAAGGTGTCATTTCC	2858:164:+
smaw_01_2795113	C01	2795113	271	-	T	C	ACCAATGTCATAAGATCTCAACATTGATTTGGCTTTTCACACCAAAAAAAGACACTCAAATATAAATTGATGGCGTTTGATGGTGNNNNNNNNNNNNNNNNNNNNNNNNNNNNNNNNNNNNNNNNNNNNNNNNNNNNTTAGTGGCCGACGTTGACCCCAATGTGCTGCCGCGCGTCCAATGGGATTCTGGCACTGACTGATGGCGGATGTTACGAGGTGTGATCATTCTTTCTCTCGAGAGGAAGATAAAATAAATGCTGTACATCTCGGATTTACAANNNNNNNNNNNNNNNNNNNNNNNNNNNNNNNNNNNNNNNNNNNNNNNNNNNNNNNNNNNNNNNTGTCTTGGCAAGAATTTTTTGAAAATGACACAGACATGAATATATAAATATATCTTTT…	2859:271:-
smaw_01_2796400	C01	2796400	227	-	T	A	CTTTTAAATTATTTTAGCCTATATTTGTTCATGTTTTGACGGATTGTCCCGAATCAGCTGTTAACCCTTTAGTGAGTGTCTATTGNNNNNNNNNNNNNNNNNNNNNNNNNNNNNNNNNNNNNNNNNNNNNNNNNNNNNNNNNNNNNNNNNNNNNNNNNNNNNNNNNAAACACGATGTGACAGATGAATTCAGAAGTGACGCGTCACAACGTCACCGTTATCCCTGGAGGCCTGAGTCGACTTTTGTACCTTCANNNNNNNNNNNNNNNNNNNNNNNNNNNNNNNNNNNNNNNNNNNNNNNNNNNNNNNNNNNNNNNNNNNNNNNNNNNNNNNNTCTCAAAATCCCAACGGCGTCCAGCAAAATGGATTTTAAACTCTCCAAATTAAATTAGAATGCGGA…	2866:227:-
smaw_01_2800580	C01	2800580	10	+	T	A	CGCAGAGATTACGTCTGGCGAACAAGCGATTGTGATGGTCACACACTCACACGGACGCCTCCACATGGCTGCTTAGCAACAAGGANNNNNNNNNNNNNNNNNNNNNNNNNNNNNNNNNNNNNNNNNNNNNNNNNNNNNNNNNNNNNNNNNNNNNNNNNNNNNNNNNNNNNNNNNNNNNNNNNNNATTGAGAGAGTGTCAGGTTTTCGTGATATTGGAGGTAAAGCGTCGTCGGCAGCTCGGGCGGGGAAAGAACTCGCTGTCCACAGATCAGGTGNNNNNNNNNNNNNNNNNNNNNNNNNNNNNNNNNNNNNNACAGCGGTGACGAAGGGGGGAGAGAGACACGAGCGTAGAGAGAAAGAGACAGATCGGAGTGATGCGGCACTAATCAGATTAACAC	2871:10:+
smaw_01_2806108	C01	2806108	84	+	A	G	GATGATATGATGGACAGGAAAATGACTGGATGCCTCCCTGCAAGATGAACTGTAATACGTTGGCATATCAGTGTCCTGCCCAGAGNNNNNNNNNNNNNNNNNNNNNNNNNNNNNNNNNNNNNNNNNNNNNNNNNNNNNNNNNNNNNNNNNNNNNNNNNNNNNNNNNNNNNNNNNNNNACATAAGCGCTGCTCAAGGCGTGTTCCCTCCATGGTGATGGTGTGCATTGCGTCGCTCGGAGCTGAGTGACGCGAGTTAATGCCAGGGTGCTTTTAC	2876:84:+
smaw_01_2809389	C01	2809389	19	+	C	T	CTGCTGTGGTTTCACCCTCTTATTCCTCCCAGTGTTTGGTGTTCAAACACGATTCCCACGCGCTCGCGCCGATGTGGATTCAGGCNNNATCGCGACTTCCCCGAGCGGGCCGCCGCAAATCCAAACACACCGCCCTCGCGCTCGGACGGTCGCAACCAAAGGACATTTTCGCTGGCGTTGTCGGGCCNNTGCAAAGGGATTCACCCGTGCACCTGGATTTCTAAAGCAGCGTCATCACAACTTCCTCGGGTTTTTCTGTGTACACAAGGGGCAG	2884:19:+
smaw_01_2814965	C01	2814965	180	-	C	T	GGGAAACCGACCATATTCGTATCTTCTGGATCAAACGTGAGCCATCACGTTTCCCGCCTTGTTGCAAAGTCTTTGTAAAATCTTTNNNNNNNNNNNNNNNNNNNNNNNNNNNNNNNNNNNNNNNNNNNNNNNNNNNNNNCCCAATTCAGGGACAGATGGCGTCACAGCGGCACGACTAGGCGGCCTCACTTAGAGGGCACCTTCCAATCGTGGCGGCGACATGCG	2891:180:-
smaw_01_2843399	C01	2843399	27	+	C	T	TATTGTCTAAATGTGATTTGCCGCCACGGGGGAGATCATTTTATGAAATAATGTTTATTTGGAAAAACTGTGGCGTCTCGCCCCTNNNNNNNNNNNNNNNNNNNNNNNNNNNNNNNNNNNNNNNNNNNNNNNNNNNNNNNNNNNNNATGAGCTCAATAAGACTGAGAATCTAAAGGAAAGTAGATCGCTGTCAGAGAAAATGATTCGGAGAGAGGAATCGTCTTACTACCCTNNNNNNNNNNNNNNNNNNNNNNNNNNNNNNNNNNNNNNNNNNNNNNNNNNNNNNNNNNNNNNNNNNNNNNNNNNNNNNNNNNNNNNNNNNNNNNNNNNNNNNNNNNNNNNNNNNNNNNNNNNNNNNNNAGAGCTACTCTGCTGTGACTGTTCATCTTTAAAATCTGC…	2916:27:+
smaw_01_2849878	C01	2849878	46	+	C	T	GAACAAAGTGAGAATATTTCTCAGCATGTGATGATTAAGCAGTTGCGACTTTGAAGCGGTCTCCCGCAGCGAGGGGTGATTCTAANNNNNNNNNNNNNNNNNNNNNNNNNNNNNNNNNNNNNNNNNNNNNNNNNNNNNNNNNNNNNNNNNNNNNNNNNNNNNNNNNNNNNNNNNNNNNNNNNNNNNNNNNNNNNNNNNNNNNNNNNNNNNNNNNNNNNNNNNNNNNNNNNNNNNNNNNNNNNNNNNNNNNNTGTTTGAGGAACAGTGTACTCGTGGTGAAAGGCAGCCGACAGGGGAACTGTTGTGAAAACTGAATGCAGAGCACGGCCTCCAGTC	2921:46:+
smaw_01_2851469	C01	2851469	219	+	T	A	GATGAAAAATGAAGTTCATACTGTAGTTCAAACCCTCAGAGGTTTGCTGAGTCTGGAGATGGCACTGGTTTTCTCAGAGTGGTTGNNNNNNNNNNNNNNNNNNNNNNNNNNNNNNNNNNNNNNNNNNNNNNNNNNNNNNNNNNNNNNNNNNNNNNNNNNNNNNNNNNNNNNNNNNNNNNNNNNNNNNNNNNNNNNNNNNTCAGTCCAAATATCATCCATAACATTAACACCAGAGTGCGATTACACGATCGCATTTTGGACTTTAGTCAGAAATGCCATCAAGG	2923:219:+
smaw_01_2854673	C01	2854673	257	-	T	C	ATTGTAACCTTTCGTGACCTGGTGAAAATGCTGTATTCAGTTCTAACTTTGAACAAATTTTGAGTTGTCATCATGTGCGAGTCGCNNNNNNNNNNNNNNNNNNNNNNNNNNNNNNNNNNNNNNNNNNNNNNNNNNNNNNAGAGACCAGGGCCGCGGATAGGAGCGGAGGCCACGCGAGGTGAAAGTGAGTGGGCGCTTTTCACAGACACTCAGCACAAAATCAAGAAGTGATAGAGCAGCTGAGAGAGGGGGGGAGAGG	2926:257:-
smaw_01_2909630	C01	2909630	204	+	A	G	GGGACAATACAAGTTCAAAATACCACGTGTAAGGAAATCTATGAATTCCTCGAACGGAGGACACAAAAGGCGCGGGGGTGTGATGNNNNNNCTCCACCCCGAGGTATTCGCCGTCAACCGCAAAGAGGTGTGAACATTGCATGGGCAATGGCGGCCGCCTGGCGAGGAGCGGGCTAGATTGGATTTCAGCGGCGGATGGCGTGAAGCGATGTTGAAAGGGGAAGGGGGGTGTGACGCGGAGCGCACACAGACCCCGTGTACAAACACACCCGGTGTGA	2973:204:+
smaw_01_2912497	C01	2912497	190	+	C	T	ATAGGAATGTTATAGTGTCAAAAAGGTAGGTTATTATTTTGGTGGGTGAAGATGAGGGCAGATGTCATTTCCTCCGCATTAGTTANNNNNNNNNNNNNNNNNNNNNNNNNNNNNNNNNTCCGCGGGGGGGGGACCCCAGCGCTTAACTGGCCTTCGCGGCATCGCGTCGAGCGAATACTGCGGCAAATTCAAGTGTTCCGACTCGGGGCGAACTTCCGGACATTTACACAGGCCTAAATTGAACAACTTTGTTCGACACAGGGAGCTCTTTCCCCCTCCGTCCCCTTCGGTTCAAAGCCCGGCGTCACACTCTCTCACT	2976:190:+
smaw_01_2915891	C01	2915891	64	-	A	G	CTCGTGCCCCAACCGACACAGCTCCTTGGATGTTTTTAAAGCATATTGTTGAATTGATTCTAGTGTCAGGGCATGAATAACCCAANNNNNNNNNNNNNNNNNNNNNNNNNNNNNNNNNNNNNNNNNNNNNNNNATATTTTTCAAATCCCTCCTTCCAGACGGGAAAACGACTCCAGTCACGCGCCGCCTCTGTTGACACGCGCACTGACGAGCCACGGCGTCGATGGTGCCCGCAGGTGACGCCGTTCGCCGGGAAAAGTGGCGGTAACAAATTAGCATCTGTCAGAGGTTGTCAGACGGAGTGGCACAACGGTG	2982:64:-
smaw_01_2933229	C01	2933229	278	-	T	C	AGATTTTACCCAACTTCTATTCTCTTTGCTCATCCTCCTCCAATTCCTGTGATTAACCCGAATGCCATTCAATATCTCCTTTCCANNNNNNNNNNNNNNNNNNNNNNNNNNNNNNNNNNNNNNNNNNNNNNNNNNNNNNNNNNNNNNNNNNNNNNNNNNNNNNNNNNNNNNNNNNNNNNNNNNNNNNNNNNNNNNNNNNNNNNNNNNNNNNNAATTTGTTGGTCCGTTCTGACCCTTTTTGCTAATTGCTATTGAGTGGGGCTTAAAATCTCGGTTTACTATCTTTGATCAGACATC	2998:278:-
smaw_01_2966220	C01	2966220	181	-	G	T	TCGCAGGTGATGTGCGATCATGAATAAGCAATGATGGACAGCACCTAATAAAAAATGTCCAATGCATTGGACTTAATACATAATANNNNNNNNNNNNNNNNNNNNNNNNNNNNNNNNNNNNNNNNNNNNNNNNNNNNNNNNNNNNNNNNNNNGACAGCGAGTTCACGATGTTCTTATCTACCTCTAGTCAACCTGAGGACACATCATCATGTATATAAAGGCAGTGCTTCATCGCAGGCGGGAGCGTTGCCGGTGTTTTCTCTCTCTCCA	3021:181:-
smaw_01_2974721	C01	2974721	115	-	T	C	CGTCGACACGATTGACAGGGGGGCGAGGGCCCTGACCTGGCGCGACCCCCACCTCTCCGTCTCGCTGAAGCCACCGCAGCAGGGGNNNTTGAACCCCAGTTTACCGCCGCGGCGACTGCCACGTTGTTTACAGCCGAGGCTTTCAGCGCACTCCTCGCCTCATCCTTTCTCCTNNNNNNNNNNNNNNNNNNNNNNNNNNNNNNNNNNNNNNNNNNNNNNNNNNNNNNNNNNNNNNNNNNNNNNNNNNNNNNNNNNNNNNNNNNGCAGAATCCCCCCTCCGCGCTCCATCCCTCCATCCCTCCATCCCTCTCTCCCCCTCTCCCTCTCTCGCTCTCCTCTTGTAACCCA	3025:115:-
smaw_01_2987231	C01	2987231	296	-	C	T	ACTGCATCAAGGTGACAAGTTGAAGCACCAGATGTTTCCTGCTGCTAGATTCAAGATTTACTGTCAAATGCTCGAGAACAATCCANNNNNNNNNNNNNNNNNNNNNNNNNNNNNNNNNNNNNNNNNNNNNNNNNNNNNNNNNNNNNNNNNNNNNNNNNNNNNNNNNNNNNNNNNNNNNNNNNNNNNNNNNNNNNNNNNNNNNNNNNNNNNNNNNNNNNNNNNNNNNNCCAAACCATGATCGTTCCAAACGGCCACAGTCAAAGGTTGAGGGGGAAAGATGGGACTCGGCCATTACGGTGATTACTTTTTGGG	3040:296:-
smaw_01_2995067	C01	2995067	15	+	T	C	TGTTTGCTCAGGTATGCGAGCGCCCACCTCCGCTGTGCGACACTCGACATATTTCTGTGAAATATGCACCCAAAAGCGTTCGCGCNNNNNNNNNNAACACGCCTTTTGTCGGTTTCTGTGGTTCCTTTGGAATCTAATCTCTCCACTGAACCGCAGGGCGTGGCGCCCAGTTTCGTGCAAGAAGCAGTTGCAACGAGGCCNNNNNNNNNNNNNNNNNNNNNNNNNNNNNNNNNNNNNNNNNNNNNNNNNNNNNNNNNNNNNNNNNNNNNNNNNNNNNNNNNNNNNNNNNNNNNNNNNNNNNNNNNNNNNNNNNNNNGAAAAAACACAACTCGATAATCTGTAATCCCATTTTGTCGTCTGAGGGCGGAAGCGGGTTCGAGTGGCGGCACGATTAATCTT…	3053:15:+
smaw_01_3007514	C01	3007514	179	-	T	C	ACGCGGCAACATCCTACATGTCTGGGTGGAATATTAAAATATTCGGCTTGCAAGTCAGAGCTGCTCAGTGCGAATGAGTCCAGCGNNNNNNNNNNNNNNNNNNNNTCAATACTGGCTAAAGCTGCCATGACGTTCGACATGAGGCCTGACTTGAAGTCACATGCCAGTTCTGTTAACGATACGTTTGCTGGTTGAATATTGCCCGGGCTTGGTGTTAGAGACCAAGCCCAGGCGC	3066:179:-
smaw_01_3015889	C01	3015889	221	-	C	T	AGTTGAGGCACTCGAGCGAGGAGCTGGGATCCGTCCACACGAGGCAGCCACAAGCAACATCAGGGGGATGAGGGGAAAGACCACGNNNNNNNNNNNNNNNNNNNNNNNNNNNNNNNNNNNNNNNNNNNNNNNNNNNCCATCACGCTCGCAACATATTCCATCAAGGACCTCCCCTCCATACTGGTGCTATCTTTCTCATCCGTCCGCGGCTGCCGCTGCCGCTCCTCTGGGACCCGGCCGTGCTCATTACGGACACACAGCATGTTCGGCTCCCGACGTTTGTTCGAGGATGNNNNNNNNNNNNNNNNNNNNNNNNNNNNNNNNNNNNNNNNNNNNNNNNNNNNNNNNNNNNNNNNNNNNNNNNNNGTTGAATATCTGGGGAAATGATAAAGAATTAAT…	3074:221:-
smaw_01_3044839	C01	3044839	134	+	T	G	GTGGAGTCTGCTCGTGTCGTTCCCCATCTAGGTCACCAAAAAAAAGGAAATCGGGCGACTGGCGATGCTAAATGGCATCATTACTNNNNNNNNNNNNNNNNNNNNNNNNNNNNNNNNTGCATTTCTGCTGTACTTCCCGAACCCCCTGACAGTATAGGATCTCAATTCGCGACGCGGCAAAACAAAGGAGGCTGAGCCAGGC	3101:134:+
smaw_01_3045756	C01	3045756	201	+	T	A	GTGGCCCGCAGCCTCCTTTGCACACACTTTGCTCCGAGAGGAAAATACATTTGTCACCACATGAGGGATCGTCCTCATTCGTTCTNNNNNNNNNNNNNNNNNNNNNNNNNNNNNNNNNNNNNNNNNNNNNNNNNNNNNNNNNNNNNNNNNNNNNNNNNNNNNNNNNNNNNNNGAGTAAAAGCCACAGAGGGAGAGATGAGTAGACGGGGGATTCCTCCTCGCCGTCTGCTCAGTGTCCACTTTCGAGTGTTCTACAAG	3102:201:+
smaw_01_3045852	C01	3045852	315	-	G	A	GGCCACGTGTTTCTTACACAAGCCATAATTGCCAGAGGGCCCTTGAACCCCATTGCTGAGTCCAGGTAGAGCACATGTGACATTTNNNNNNNNNNNNNNNNNNNNNNNNNNNNNNNNNNNNNNNNNNNNNNNNNNNNNNNNNNNNNNNNNNNNNNNNNNNNNNNNNNNNNNNNNNNNNNNNNNNNNNNNNNNNNNNNNNNNNNNNNNNNNNNNNNNNNNNNNNNNNNNNNNNNNNNNCCATCCATCACCTGGGAAAAGGGCGTCGGCCACTGTCTCGCAAAAGGGTCTGACTGGAAGCAGACAGGACTGGGCCGCGTGGTGTCGTA	3104:315:-
smaw_01_3047358	C01	3047358	30	-	C	T	GCAGCGGAGATTCGCGGCATTACGAAGACGATTGTTTGTGGAAAATACTTTCGCATAATCCTATGACCCACTTTTGCTCTTCTGCNNNNNNNNNNNNNNNNNNNNNNNNNNNNNNNNNNNNNNNCGGGCCGCTCTCAAGAATACATTTCCATCGTTTAGTGTAAATGTAAACTACTTTCTCTCTTTTTCCTCTTTCTCTCACGAGAGATGACTCCCGTACAGCCACCCAGCATGACGATGGCTCGGCGGGTGGGGGAGCGAGGCACGACNNNNNNNNNNNNNNNNNNNNNNNNNNNNNNNNNNNNNNTGCAGGCGTCCACTGTTTTCTTCCGAGCTCCTGCATCTCTAATGACGGATAAAGCAGCTGCTGTGCGAGACTCTGGCCTGTGTGG	3106:30:-
smaw_01_3051992	C01	3051992	51	+	A	G	ACAATACGACAGAGAAACATCGAGCAAACCGAGATTGCACCACTCCTGACAGCAACCGAATTGCAACTTTGACAGGTTGGTTGGANNNNNNNNNTCTGTCGGCTCTGTTAAATGAGAAAGTTCCACTCTCTACCTGCGGGCATCACTTTTGTGTCCGCGCTCAGGTGGACCTGGACGCGATTGAAGACGCGCCGGGC	3119:51:+
smaw_01_3052170	C01	3052170	221	-	G	A	CACCTTTTTACAGATGAGTAAATCAGGTGCGGTAGTTTTGCATCAACAACCAAAATTGAATGATACATTATGCAAACATTTCCGANNNNNNNNNNNNNNNNNNNNNNNNNNNNNNNNNNNNNNNNNNNNNNNNNNNNNNGCGCAGACCGAGCAGACTTGAAAGACGAGAGTATTTGGAACAGGGAGCGCCGCAGTCGGGCTCCTCAAGGTGGAGAGTCGGCGAGCAGAAAAACACGCCGGCGG	3120:221:-
smaw_01_3067234	C01	3067234	26	+	G	A	ACTGGAAGCGCCTCGCTGTCATGCAGCGATGTCTGCAAAAGCCGAGGCGACGGAACAGACGAAGCAATTTCAAAGACTTTCGTGTNNNNNNNNNNNNNNNNNNNNNNNNNNNNNNNNNNNNNNNNNTTTCACGCAATCGTTTTTTTTATCCGCCGTACCTGCGAGAGCTGCTCTCAGGAGATTCAGTACGGTACATATCCCACCACTAAGTGCCTCTGATGTTCAGATGCGNNNNNNGGGTCACCGGCTTGGTGCTTAAACTGTGTGCCAAGCGAACAACAGGATATGGGGGTTCAATGTCCGCGGCTCCATGGCAAGCTGC	3137:26:+
smaw_01_3078053	C01	3078053	40	-	T	A	ACGCTGCTGGTCTCGCGGCTGAATGTGACCTCTGACCTTATTGTGAAGGCCTTGGAGAGTCATGTCCTGGCTCGTTTTTTCGTAANNNNNNNNNNNNNNNNNNNNNNNNNNNNNNNNNNNNNNNNNNNNNNNNNNNNNNNNNNNNNNNNNNNNNNNNNNNNNNNNNNNNNNNNNNNNNNNNNNNNNNNNNNNNNNNNNNNNNNNNNNNNNNNNNNNNNNNNNNNNNNNNNNNNNNNNNNNNNNNNNNNNNNNNNNNNNNNNNNNNNNNNNNNNNNTATGACCATGTGTATTCATGACTTCTGTGCCAGAGCGCTTCCTAGAATCATACGCTGCGTCATGATACTGTACTCATGACGGGTG	3148:40:-
smaw_01_3088684	C01	3088684	65	+	C	G	TGTTGCAAGCAGACGCCCTGTCAGTGTCTCTCGAGCAGCGTTGACGTCCTGCTTGCGACAATCGCGTCTTCTGCGTTGCGCCGAANNNNNNNNNNNNNNNNACAGCCGCGCGCATCAACACTGAACCCTCGTGCTGAATTGATGTATGAATTCATCAGGGCTGTTTCTCTACGGTTGCCTTTTAATGTTTGCGTTTCACCGGCGGT	3165:65:+
smaw_01_3090240	C01	3090240	153	-	G	A	TGTCACTCTGCCCTGCACTTTCCCAAACTGTGTGTTGGAACAGAGGCGCTCTCTCGGACGTAATCTAATCTAATCTGGTACAGTCNNNNNNNNNNNNNNNNNNNNNNNNNNNNNNNNNNNNNNTGCTCAGTGACTCGTTCAGAAGCTGGATTCACTCACTGCGCGCTCGGCTGAATGGTGCGGCCAAAAAATACTAATAGAATTGGAG	3172:153:-
smaw_01_3095365	C01	3095365	177	+	G	T	TTGCCCTCCACTGGCAATTACTTTCATCCACAGACTGTGACCAGGAACTGTTACCCTTGGGGTTGGTACACAAACACACACACACNNNNNNNNNNNNNNNNNNNNNNNNNNNNNNNNNNNNNNNNNNNNNNNNNNNNNTTGGTTCTGAATCTGGACCTGATCCCTTCCTACACAGTGGCAATCCTCCTAAATGCACCCCGATGGCTGCGTGGTCACTGGTCCCT	3175:177:+
smaw_01_3163842	C01	3163842	249	-	T	C	GTCCCTTCACCTCCGCCTGTATCTATACTCCCAGCCGTTTGAATTAGTGACCCGCACCCACCCTCCATTTGCAAGCCTCGTTTATNNNNNNNNNNNNNNNNNNNNNNNNNNNNNNNNNNNNNNNNNNNNNNNNNNNNNNNNNNNNNNNNNNNNNNNNNNNNNNNNNNNNNNNNNCCGTTGGTGCGGGCGTGCTGACAGTCTCCATCACGGCCAGGTTGCCCCCCCTGTAAAACAGAGAGGGGCTAACGAGAGAGTGAAAAGATGAGGAGAGACGG	3236:249:-
smaw_01_3190028	C01	3190028	187	+	A	G	AATGGTCCAGCTGCTTAAACCTTCAACACATTGATCGCTGAGACAATTTTGACCCACCGACACGTTGGCAACAAAAAGGAGGAGANNNNNNNNNNNNNNNNNNNNNNNNNNNNNNNNNNNNNNNNNNNNNNNNNNNNNNNNNNNNNNNNNNNNNNNNNNNNNAAGGAGATCAGATCCCGTTGTATCACAGGCTCTAATTTCTGAAGCTGTGGTCAGGACAATTGTACGTCATCACGCGTCACCAGAACGAGCT	3265:187:+
smaw_01_3206369	C01	3206369	220	-	G	A	GCAACACATAATCCACTCCATGAAATAGACAGACAGACAGACATCAGGGGCGCAGCCCCCTTGACATAAACACTTTTCAATGTCANNNNNNNNNNNNNNNNNNNNNNNNNNNNNNNNNNNNNNNNNNNNNNNNNNNNNNNNNNNNNNNNNNNNNNNNNNNNNNNNNNNNNNNNNNNNNNNNNNNNNNNNNNNNNNNNNNNNNNNNNNNNAGAAGAAGCACGCCAACAGCAGAAGACACACATTTCCTTGGCACAAAGAGAGAAAGAAAAGTACTTTGGTGTCGCGTCAGTCATT	3279:220:-
smaw_01_3241468	C01	3241468	240	-	G	A	GGGGAAACACACAGAGAGAGAAGGGGTGAAATACAAATGTAGATAAGATTTTCTTCTCCTTCTCTCTGCCAGCAAATTCCTCAACNNNNNNNNNNNNNNNNNNNNNNNNNNNNNNNNNNNNNNNNNNNNNNNNNNNNNNNNGGGCAACGGAGAACACTTGGCATTTAGTTGGGTTGTGAGGTTGGAGGCAATGGTCCGTGCAGATGCTGTGTTTTGTATGAGTCTACAAAAATCATTAGCGGGAACATGCACATTACAGGGACTGCCACT	3306:240:-
smaw_01_3241789	C01	3241789	74	+	T	C	AAGAGTAAAATTATAAATCATCTCCCCGCAGACAAAATTTCATGCTTGACGGGTGAACAACTCCAGCATCTGGTGGGGTCCTGTGNNNNNNNNNNNNNNNNNNNNNNNNNNNNNNNNNNNNNNNNNNNNNNNNNCATCGGCAACAGCATCCTGCCCAACATTACACACGTGCAGCTCACACGATAAGACGGCGAAAAAGGAGATTAATAGGGAGCAGGGCCCCTCCCCGTCGCCGGGCACAACCGCGCTCTGCTGGTCGGGTGGTGGC	3307:74:+
smaw_01_3251404	C01	3251404	239	-	G	A	ACACTGCGGAAGAGCCATAGGAATAAAAGCGCGGACACAATTTTTTTGCAAAATGCACAAAGCTAAGAGCGGATGAATTCGGTCTNNNNNNNNNNNNNNNNNNNNNNNNNNNNNNNNNNNNNNNNNNNNNNNNNNNNNAAAAAAACGGCAGTCATCAGTCTCACATACACGTGCATGAGGTCACAAATAGTCAATTTGACAAGCGGCCGCTCAAATGAACAGAACCTCGGCTTCTGCGCGTGTGATTCATGTGTGGATCAGTCACACAGAGGAGTGCACACTGTTCCTCAGTGAGTCGTGCCGGAGCCCACG	3322:239:-
smaw_01_3266006	C01	3266006	251	-	C	T	GCAACAATGTATTCATGAGTCACCCTGAGGCTCACAAATAGGTGACGCAGCGCCTCATCTTTTCTCACATTTTTGTGATGTGTTTNNNNNNNNNNNNNNNNNNNNNNNNNNNNNNNNNNNNNNNNNNNNNNNNNNNNNNNNNNNNNNNNNNNNNNNNNNNNNNNNNNNNNNNNNNNNNNNNNNNNNNNNNNNNNNTATCTCAGTCCTCCTGGTGGCCTTCAGACAAGGTGAGCGCGAAACGTTTGGACTCGCGACGCAAATAAATTGCGCGACTCCACATA	3336:251:-
smaw_01_3291503	C01	3291503	30	+	G	C	GCTCCATCTTTCCGAGCTCTGCCACACTTGTCCTGTGACCCCTAAAAGCCACGTCTCCGCCCTTTGAAGCGCCGCTAATGGCACANNNNNNNNNNNNNNNNNNNNNNNNNNNNNNNNCCGTGAACATTTCCCGTCGATCCTATTGCCACTGTCATCCGCGCTCTTTTCGGATTCCTTTCGCCACTGTGGTTTTATGTGTTGTGTTTTCCATTTTTCCATAGGGGCCGCGTGCGCCATAGGAGACG	3360:30:+
smaw_01_3338002	C01	3338002	22	+	T	A	AATGAAAACAGGACTCCGCTGTTTGGCGATGATCCTTACATTATGAGTGTGGAGCCCCGCCGAACCTCCGTGGACCAACTCAGAGNNNNNNNNNNNNNNNNNNNNNNNNNNNNNNNNNNNNNNNNNNNNNNNNNNNNNNNNNNNNNNNNNNNNNNNNNNNNNNNNNNNNNNNNNNNNNNNNTTTGACACAGTGGCAGTTCCCAAACGAGTCCATTAACGCACTTACCTCGACTTCATTTTCAGGCGATGTGGACACTTTTCCATGGG	3409:22:+
smaw_01_3385797	C01	3385797	59	+	C	T	CTCCGCAGTGGGGAAATCTAACTGGCTGGAATCAACCTGCTCTCCCGCTGCTTGTCTCCGCGTCTCCTGCTTGTCACACCTTGCTNNNNNNNGCACTCTCGGAGATATTATATCTGGGCAAATTAGCCCACGCGGTGCTCTCGAAGTCATCAGCACTCTTAATAGTGCTGCTACCATNNNNNNNNNNNNNNNNNNNNNNNNNNNNNNNNNNNNNNNNNNNNNNNNNNNNNNNNNNNNNNNGAAAAATAAATTCTGAGATATTATTATCCTCTTCCATCAGGTGACCAAGAATGGTGACAATGGCTTTTCTATTCAAGGTGTACGC	3440:59:+
smaw_01_3387066	C01	3387066	10	+	G	A	CTTGAGCACGTGATAGTACTGTGTATTGCTGGAAATGTAAGATGTTGCATGTGAACACAGCACATTTTGGTTAATTATGACCGAANNNNNNNNNNNNNNNNNNNNNNNNNNNNNNNNNNNNNNNNNNNNNNNNNNNNNNNNNNNNNNNNNNNNNNNNNNNNNNNNNNNNNNNNNNNNNNNNNNNNNNNNNNNNNNNNNNNNNNNNNNNNNNNNNNNNNNNNNNNNNNNNNNNNNNNNTGCCAGTTACCCAACTCCTCAGTGCCTTCTACCGCCACGAGCATTTAACTCCAAAGCCTAAGACACACTTATGGCCTGGCAATCGACT	3446:10:+
smaw_01_3389483	C01	3389483	193	-	G	C	CGCAAAGATGCAAAATGAGCACGCTGAGCAGTCGCTCGACACTATTTTTTGCGACGTGTGCTCCGTGGAGCAACTGCAAAGTGGCNNNNNNNNNNNNNNNNNNNNNNNNNNNNNNNNNNGCAAATCCTTCTCTTGTGGACTTCATTTGTACTATTCTGGTTTTGGGAAAAGATTGCGTGAAGTGACGTGGAGCAAAAACAAGCT	3450:193:-
smaw_01_3402715	C01	3402715	5	+	A	T	TCAAAAATATGGAAAATATTAAAAGCGTGTTCTTTTTGATTCCAATCTGATCGCTTTTGCCTCTGACAGGAAACTCATGTTCGCTNNNNNNNNNNNNNNNNNNNNNNNNNNNNNNNNNNNNNNNNNNNNNNNNNNNNNNNNNNNNNNNNNNNNNNNNNNNNNNNNNNNNNNNNNNNNCCATCCGCCTCTGACCCTGTCGCTTGTGGGATGACAAATTGGCCACAAGTCGACGAGTCACGTGACTCCATCTGTGTTGGCGAGGCAGCGG	3458:5:+
smaw_01_3403461	C01	3403461	62	+	G	A	AGTTACCGTCAACATTTCAGGTGCGTCATAAAACAAGACTTCACATAAATTGTGACAGCGGGAGATTTTGCAAATTCTCAAATTGNNNNNNNNNNNNNNNNNNNNNNNNNNNNNNNNNNNNNNNNNNNNNNNNNNNNNNNNNNNNNNNNNNNNNNNNNNNNNNNNNNNNNNNNNNNNNNNNNNNNNAAGACATCAGCCTCCGAGCCGTCGTGGAGCAGCTTCTTTCCACCCCAGGAAACATCACGGATCAACACTCCTTTTCTCTTTGACCTTTGGATCTTGAACGCACCTTTCATGCCGACAAATATCGATTGCCTCTC	3460:62:+
smaw_01_3422312	C01	3422312	32	+	T	C	GATCAAACTGCCCTCAGCAGTCGTCTCGATCTAAATTACAGTTCAACTGACCAACACAAAGTGGAGAAGTGTGATGGAAGCGACANNNNNNNNNNNNNNNNNNNNNNNNNNNNNNNNNNNNNNNNNNNNNNNNNNNNNNNNNNNNNNNNNNNNNNNTCACCCTTGTGTGTATTCGGAGCCCGAGAGGGACAGATTTCCTTGGTACCATGGACGTGACAGAATTTGAAATCAAAGCTGTGAA	3475:32:+
smaw_01_3437501	C01	3437501	9	+	G	A	GAGATTTGGGGTGTCAAGTAGGGACAGCTAAGAGTAACAAAATTAGCACAGGTCACCCACTTATGAGAGCTATTCTGACGGGTGGNNNNNNNNNNNNNNNNNCGGGAGATACTGCCTCTTTAGAGGGAAAGCAGCCATACAAACACTTCAATTACTCCGTTAAAGAGCGCGTCGAGAGGATGCAACCAAACAGCCATTTCCACCCGACCGCGCTCGGCTGAGGACTGGAGCATCGCGGCTAATTGGTCGGTGCATTTGAATGCAGGCAGTT	3484:9:+
smaw_01_3445863	C01	3445863	56	+	G	A	TGCATGTGTAAGCTAATAACACCACTTATAAGCATTAGGAAATTATATATCACATGCGCAGAGGATGTAAGTGGTTATATATTCTNNNNNNNNNNNNNNNNNNNNNNNNNNNNNNNNNNNNNNNNNNNNNNNNNNNNNNNNNNNNNNNNNNNNNNNNNNNNNNNNNNNNNNNNNNNNNNNNNNNNNNNTTTCACACGGTTCAACTGTACGCTCCTCTGCTGTGGACCTTGCCCCACTTGACTCCGTCCCGCTCCACCCAGCTGGATACCAGATCCCAAACCCTCC	3491:56:+
smaw_01_3447243	C01	3447243	68	-	A	T	CCAACATCTACTTTGTGTGGCAGCCGCTTCTTTAAAGTGCAATGCAGCACAGTAACAGTAAAAGATGTCGTGTGGACACACTGCTNNNNNNNNNNNNNNNNNNNNNNNNNNNNNNNNNNNNNNNNNNNNNNNNNNNNNNNNNNNNNNNNNNNNNNNNNNNNNNNNNNNNNNATTTCTTTCCTGCGCTGGCACTGAGGGAGCTACAGGAAGGACGAGGTCAACTAGCTGCGAGTTCATCAAACAGCTCATGGAGGTAA	3493:68:-
smaw_01_3479779	C01	3479779	13	+	A	G	AGACCGATCTCCATGCACGCTGAACGAGGACGGGCCGAGGTGCCCGTTGGGCAATGCGTGCACACTATTCACGTGCAAGCTGGGCNNNNNNNNNNNNNNNNNNNNNNNNNGCTCGTCCGTCGCGACTTCAACACTGACTCCAGGGGAAACATCTTCGCACCTAATTAGAAATGTGAACGGAAGTCATAGGTCATAACGATGACGACCACGACAACGATGAAATGACACCGATTATATTTCAACCAATTCAAGAAGCACCTGTGAAA	3525:13:+
smaw_01_3500311	C01	3500311	51	+	G	A	AAGCGAGCGTGGTCGGTTTCTTTCAGCGTCTGGTCGGCCTGCGTGATGAGGGCCGAGGACCGCTCGATGCACTGCTTGCAGTTGGNNNNNNNNNNNNNNNNNNNNNNNNNNNNNNNNNNCTGGGAGGAATGTCAAACGCAGAGAGAAGTCTGAGAACATCATTTCTGCTAGGGTGGACAGAACAATCAAATCGAGGGAGCATGAAAGCGTCC	3543:51:+
smaw_01_3517564	C01	3517564	350	-	G	T	GGAAAAGAAGCAGGAGGAATATTCTTCCTCTAGTAACTCAGCTTTGTGTTGCCCCCCACTGGCGACTACTGGTACTGACGCTCCANNNNNNNNNNNNNNNNNNNNNNNNNNNNNNNNNNNNNNNNNNNNNNNNNNNNNNNNNNNNNNNNNNNNNNNNNNNNNNAACAGCCACGCCCCCCGCCCCCTCTCGTGTTCCGACTTCCTCTTCCATTCTCTCCATCATTTCCACACACACACACACACACACACACACACACANNNNNNNNNNNNNNNNNNNNNNNNNNNNNNNNNNNNTCACCTCGGTGCCTGGTTCAACAGTGTCACCTATAGCATGCTGACAGGCATTTCACCTGGTCTCACCCGCCAATCTGGATTTGTGC	3558:350:-
smaw_01_3530687	C01	3530687	212	-	T	G	GACGAGAGCACGGGAGGTTGCAGAGCCTGACTTTCACTTATAACTAATTCATGCTTCACGCTGTCACTTGGCACACCTGGGAAAANNNNNNNNNNNNNNNNNNNNNNNNNNNNNNNNNNNNNNNNNNNNNNNNNNNNNNNNNNNNNNNNNNNNNNNNNNNNNNNNNNNNNNNNNNNNNNNNNNNNNTACCTCCTTTGGGGCGCCAAATGACAGAGTTGCACTAACTCAAACGGCGGTACGGTTTTGCCAATGCACTTCTGGGCCCACAGTAGGA	3569:212:-
smaw_01_3535520	C01	3535520	205	-	A	G	AACTCACACTCACAGTGACAATAAACTTGAGTTGATGATATAAAGCTGCTTGCAGACATGCAATGAAGTTCCAAAGTCTTTGCGCNNNNNNNNNNNNNNNNNNNNNNNNNNNNNNNNNNNNNNNNNNNNNNNNNNNNNNTGGCTCTTTGATTGACTGAAGCTCAGATGTCAATGTGGCCTACAAGCAGAAGTGGATCGAATCAGTGTGTGCTGGTGGAGAAGGCA	3572:205:-
smaw_01_3541575	C01	3541575	283	-	A	T	GGAAACCACATGACTACATCATACTGATTTAGTTGAATCGTACTCATTTAGAGTTATTATTTTGCTGTAAGACGTATAATACTAGNNNNNNNNNNNNNNNNNNNNNNNNNNNTCTGCTGTAGAGATGGGCCAGTTGGGTGAACAGACGGGGAGCGCGTGGGCCTGCGATTCCCTTCTGGTGCAGAGTTGACCTCCTGNNTGTGGAGATTCCGCCGAGGGAAAGCTGCTGACGCTCAGGCAAAAGCAGCCTTGACCTGTTTGTTTCACTTTCAAACTGTATACTGT	3577:283:-
smaw_01_3565972	C01	3565972	53	+	A	G	ACACACGTTCCAACACTTTCATTTGGCTTTTTCTTCATACAGTACGAATGCGATAACCTCGAACACCCCGAAACAAACGGATTCANNNNNNNNNNNNNNNNNNNNNNNNNNNNNNATAAATCTACAGACCTGTAAGATGGACGAGACAAGGTCGGAGGAGTCCTTGTGCTCCTCTCGCTGCGGATGGTCCTGCCGATAGCC	3592:53:+
smaw_01_3566925	C01	3566925	196	-	G	A	GCAAATTTGTTGTGTCACAGTGTTAGTGGTCATGTCGCTCATGAACCACAGCCCTCCACTTGTGGTTGTGGAATGCATTTTGCTTNCTCCCTCTCTCTCTCTCTCTTTTTTTATGTCTACTTTTTTTTACACAAAACACACACACACACACACACACACACACACACACGCTGAGCTGCTGGTCTGTTTTCTCTCCGCTGTTGGCTCAGCCTTTGGGATTCTGTACGATAGAACATATA	3595:196:-
smaw_01_3567361	C01	3567361	3	+	C	G	ATCTTTTGTCCAGCACTATTTATGTCCATGTCCACGTAATGTGTTTATATCAGCTGGATGTGTTCTCAGTGTGTGTGCAGAGAGTNNNNNNNNNNNNNNNNNNNNNNNNNNNNNNNNNNNNNNNNNNNNNNNNNNNNNNNNNNNNNNNNNNNNNNNNNNNNNNNNNNGGACAAAAACGGCGAAAAATGCCAACGAGCATTTGTAAGATCAATTACTAAGTCTTCGCTTTGGCTTGACTTGATCCTATCCGAGGTACTGTCGGCCGCCGGCGCTCCAAAGTTCCAACACATGCAGCCCGCATTAC	3597:3:+
smaw_01_3567842	C01	3567842	54	+	C	A	AGTGTCAGCATGGCACGCTGTCAAATACAAGTGTGTCTATTGAGGGCAAAAATCGAAATCTGCGATCCGCACCCACCTGCTCACANNNNNNNNNNNNNNNNNNNNNNNNNNNNNNNNNNNNNGCCACTCTTTCCATCTGGGCTCCTTTGACTTACGTCCTCTTCGCTTTGCGCCAAATAAGCTTTCCTTCGTGCAGCAGGGCGGCCGCATCTCGGGGCCCCGGCCCCCTTACAAAGGGCTCCATCCACTTAAGCTAAATATA	3600:54:+
smaw_01_3584644	C01	3584644	22	+	A	T	GCATGTCATCTCCAATGTGCTATTCGTGTCACATGCGTCTGTTATCGCTGGCATCGTCCGTGTTATTCCTGGTCTGACTCGGAATNNNNNNNNNNNNNNNNNNNNNNNNNNNNNNNNNNNNNNNNNNNNNNNNNNNNNNNNNNNNNNNNNNGGCAGCTCGTCTGTCTCAATCTGTCTGGCCTCGGTTCTCTCAGTCCATCCGTCTCTTTCTGTCCGTCTGAGGCTTTTCAATGAAGAGCGATGGAG	3615:22:+
smaw_01_3600239	C01	3600239	24	+	A	G	ATAAACACGCGGGGCCTTCGAGGAATGCTCTGTTCACAGCGGGCAGCGGCGCTTTTATCCCTCCGCTGATAATGTGGGTCAGCGANNNNNNNNNNNNNNNNNNNNNNNNNNNNNNNNNNNNNNNNNNNNNNNNNNNNNNNNNNNNNNNNNNNNNNNNNNNNNNNNNNNNNCTGTTTCTGGACGTTCAGGAACTTGTTTTTCTACCTCCGCCCTTTTTCGTACAGTCGGAGTCGTGGACGGTGTTCGGCGGTCAGGNNNNNNNNNNNNNNNAGGAGTTGGCAACAGCAGGAACATGTCCGTCACGTTCGGGCGAGGGGAGATTATCCCGCTTTATTCTCACATGCGCTCTCCCTGACATTCTCCAGAGCCGGACATTTTCCGCCTGCGCTCCTTTTGCGC…	3629:24:+
smaw_01_3602192	C01	3602192	64	+	C	A	CAGGGTCAGCGCCGTGTTTACATCACCGATTTGTTGCCGTGGCAACAGACAGACCCTCGCAGTCGAGAAAAGAGGAGAGTCCACANNNNNNNNNNNNNNNNNNNNNNNNNNNNNNNNNNNNNNNNNNNNNNNNNNNNNNNNNNNNNNNNNNNNNNNNNNNNNNNNNNNAAATCATAAGCCGTCTCTCTTCTTAGTGCCTCTCTCATATGGTCTTGAAGATTTCAGCACAGTACAATTATCAAATGCTAAAACAAATGCCACGTATGCGTCGTCACAAAAATCCAATGTGTGTTCTTCTAATCTCCTCAT	3632:64:+
smaw_01_3620151	C01	3620151	23	+	G	C	GCATGAGTGGTTTGAATTCCACGTTGATTCTTTGGATTGTGCACATGGATCGTATTTGTCACGACTTAATTATGAATGGAAAACGNNNNNNNNNNNNNNNNNNNNNNNNNNNNNNNNNNNNNNNNNNNNNNNNNNNNNNNNNNNNNNNNNNNNNNNNNNNNNNNNNNNNNNNNNNNNNNNNNNNNNNNNNNCTCAGCTGGTGATGGTGCCCTGTCAGATGAATGTTGTGCACATCCTGGAGTCTTACGTGAAACACTTTGCCATCAACAAAGCATTCATGGC	3644:23:+
smaw_01_3641319	C01	3641319	271	+	C	G	GTGCAGAGCAGGCGGTGCGATGTAAGTGGCTGTTGAAAAAGGGGTGACAGTGATTTACTGTGCGTTTAAACACCAACACGGAGAGNNNNNNNNNNNNNNNNNNNNNNNNNNNNNNNNNNNNNNNNNNNNNNNNNNNNNNNNNNNNNNNNNNNNNNNNNNNNNNNNNNNNNNNNNNNNNNNNNNNNNNNNNNNNNNNNNNNNNNNNNNNNNNNNNTCTCTTCTTAAAAATCCCCTTACAAGATAAGGAAGGTTATTTTGTTGGACATGCTACATCCTGCTCTTTTAAGGGAGACAGGAGA	3655:271:+
smaw_01_3645926	C01	3645926	75	-	C	G	CTCTGGGACCAGTCAGCCCCTTTCTGCTGCTCTCCACCTGGCTTAGTTAGGGCTGCAAACAGACCTCTGTGCGTGTGCTCTCCATNNNNNNNNNNNNNNNNNNNNNNNNATCCTAACCGCGGTGAGCAGGGGACGAGAGAGTAGGAGGGAGGAAGAGAGTGAGGGGGGGAGGGACAGAGCGAACGGATGACGGAT	3661:75:-
smaw_01_3650248	C01	3650248	231	+	G	A	AATTCATTTCCTGGTGAACACTGATATTCTGTTATGTTGTGATTACCCTTAATTCCAGTCATCTCTCACACCAGCTAATACAGAGNNNNNNNNNNNNNNNNNNNNNNNNNNNNNNNNNNNNNNNNNNNNNNNNNNNNNNNNNNNNNNNNNNNNNNNNNNNNNNNNNNNNNNNNNNNNNNNNNNNNNNNNNNNNNNNCATCTGAACTTCCTTCCCTCGTCTCTGCGTCGGCGAAAGAAAAAAGCATCATCTCCCAATTAGGGCTTTGCATCTCAAACAGCGA	3665:231:+
smaw_01_3661679	C01	3661679	250	-	C	A	AGTCCCAATAACAACAATAGCAGAGTGCAGAGAGACCAAAACAGGCGACGCTGGGTACCAGTACCGAATTCCAGGCACCACTGCGNNNNNNNNNNNNNNNNNNNNNNNNNNNNNNNNNNNNNNNNNNNNNNNNNNNNNNNNNNNNNNNNNNNNNNNNNNNNNNNNNNNNNNNNNNNNNNNNNNNNNNNNNNNNNNNNNNNNNNNNNNNNNNNNNNNNNNNNNNNNNNNNNNNNNNNNNNNNNNNGCTACGGTAACGATGGGATGATCAATGGCTTTTCAGTGCCAAAATTAGATTAATATTCCATTACACAGCATATTCTCTCAGCGTG	3668:250:-
smaw_01_3712392	C01	3712392	223	-	A	C	GATGAATGCCCCGTGATGAAAACCCATGATGCCAAGGCTCTAAACAGCAGGATCTTTGGCTCTGACCAAGTCGCAACCCACCGTGNNNNNNNNNNNNNNNNNNNNNNNNNNNNNNNNNNNNNNNNNNNNNNNNNNNNNNNNNTGGCTTTTTGGCCAGCGCCATATTTTATTTTTTTTCTGAAACCAGAAATAACCTGGTTAAGGTATCAGGCACTTGCACATTGGCCTC	3702:223:-
smaw_01_3727408	C01	3727408	71	+	C	T	ACAACACGCTCCCTTTATGTCCAGAGGTGAATACAAAACATGAAAGCCTTATAACTCATGTTTCCTTTTTCCCCACAACAAATTANNNNNNNNNNNNNNNNNNNNNNNNNNNNNNNNNNNNNNNNNNNNNNNNNNNNNNNNNNNNNNNNNNNNNNNNNNNNNNNNNNNNNNNNNNNNNNNNNNNNNNNNNNNNNNNNTCAATTTTGACTAAACCGAAGAACACATCGTCTTGCGGCGTAGGAAGCCGCCCACTCAGAGCACACATTGAGATGTGAGGCCTGC	3720:71:+
smaw_01_3756310	C01	3756310	155	-	G	A	TGCACTTTTTCTCTGAAAGTGTAACTTTAAGCATAAAATATATACGTAGGTGCTAAGGTGAGCAGACACGTCGTAGTTACCACTGNNNNNNNNNNNNNNNNNNNNNNNNNNNNNNNNNNNNNNNNNNNNNNNNNNNNNNNNNNNNNNNNAGGCACCCCGAGATTCAATATATCGGACGACAGAGGAATGCTGCGTCCCCAGGCCCTTCTTGTAAAGTGGCCCATAAATCAAGAAGCCTGTTGAGGGCCGGCCTCTGCGNNNNNNNNNNNNNNNNNNNNNNNNNNNNAGCCGTGCTGTGGCTGGGACGAAGGCACACCAGTAGCCCCCCTCAACTGCGATGCAAAAGATGTTTTCAGCCCCATAAAATCATTACCA	3745:155:-
smaw_01_3776741	C01	3776741	185	-	A	G	TCAAAAGCAGTGCTTCCCATGGCACATTTGAAATGGTTTTCTGACAGTGTAATACCAAAGTAATTTACTTGACTGCATTCTGGGTNNNNNNNNNNNNNNNNNNNNNNNNNNNNNNNNNNNNNNNNNNNNNNNNTTTGATGTGCCCGAGCCATGCAGAGTGCCACCATTACATTTGGTCATGTGGTTCGGCTGTACAGATACGTTTGTCCTCAGAGGCC	3760:185:-
smaw_01_3777010	C01	3777010	77	+	C	T	GCAGAGGGGAGGAGGAGGGATTAGGAAACATTTCAAAATCGAGGAATTGTGATCCCAGTTTTAGAACTATACAATGCGCATGCAANNNNNNNNNNNNNNNNNNNNNNNNTTCAATGACCTAATTTCTGCGTGTGGTCTACCTCCGCAGTGCAGCTAACCCCTATAAAAACACACTCCGCGGTTAACCGACGGCAGATCCAAGTGCCCCGGAAGTTACCGCCGCACTGTGGAATT	3761:77:+
smaw_01_3780952	C01	3780952	232	+	G	A	CACGACGCCGTGTCTCCACAGCCCCCCTGACCTGCAAACAAACTGGGCAGTTCATTTGTGCATAGGCAAGAACCAGTGGTGGGTGNNNNNNNTCGTACAGGAGACGGGAGGCTAATGAGAGGGGACACGGTGTGCGGTTTTCTTTAAAGGGGCTGAACTCCACGTGATGCACTGCAANNNNNNNNNNNNNNNNNNNNNNNNNNNNNNNNNNNNNNNNNNNNNNNNNNNNACGAGGCCACTTGTCCGAATGCATTACTGTAATAAAGCCCGTGGTACAGTGTATCTGTGTGTTGACCTTGTTGGCGTCCAGTTCTCGGAATTGCTCGCCGGTGTGCGCGAG	3765:232:+
smaw_01_3806157	C01	3806157	267	-	G	A	CGGATCACCATCATCGTGCTCCCTGTCGTGTCACGTTCTCAGACCAAAAGAATACCAGCGTCGGTTCAGGAGGAATTGTTATGTGNNNNNNNNNNNNNNNNNNNNNNNNNNNNNNNNNNNNNNNNNNNNNNNNNNNNNNNNNNNNNNNNNNNNNNNNNNNNNNNNNNNNNNNNNNNNNNNNNATTCCTTACCCCTTTAAACCTTGTAAACAGTTTCTCAGATCGACGCGTCGACAAGCGGTGCTGGCTTTTTTTATCGGGATCAATCTCGCAGAATGTTTCGAGGAGATAATTAACCGGTGCTTTCATCTTCATTTTAACTGGCGTGTTCATTAACGG	3788:267:-
smaw_01_3812694	C01	3812694	69	+	G	A	GCAGCACTCTGCATTTTTTCGAGGAGTCGGTATTGTTTGTGTCGTGTGTCTCGATGCCTCACAAAGCTGTTTGTTAGATGAGGGGNNNNNNNNNNNNNNNNNNNNNNNNNNNNNNNNNNNNNNNNNNNNNNNNNNNNNNNNNNNNNNNNNNNNNNNNNNNNNNNNNNNNTCACTTTTACATCTGCTCCTTGTCAAACGTTCCCCTGAGATAAGCACCAACTGGGAGTAAACATATGGATACAAGTCGATTGTCGTGGCGCC	3796:69:+
smaw_01_3813144	C01	3813144	264	-	C	T	TCTGTACACGAGAGGCCACAGTGACATAGGGTTTAGACTTTTGACCATCGGCATCGATCAGGGCATCTTGAGCCCGAGTGTGTCCNNNNNNNNNNNNNNNNNNNNNNNNNNNNNNNNNNNNNNNNNNNNNNNNNNNNNNNNNNNNNNNNNNNNNNNNNNNNNNNNNNNNNNNNNNTGGCCAAGGCTGTCGCTGGCGCCGTGGACGCATACAACCCCCAGAATTATCACTTACAGTAATAACTGTGGCCGCCAAACGTTGCTCCGAT	3797:264:-
smaw_01_3831024	C01	3831024	159	-	C	T	ATTAAAAAGGAGAAGATAACACAGCCATATCCCTCCTGTATTCAGGGCTTCTAACATCTGCCACATCGTGATCGTGTCCCTTATGNNNNNNNNNNNNNNNNNNNNNNNNNNNNNNNNNNNNNNNNNNNNNNNNNNNNAGCATGGAACGGCTCCAATGCGGTGAGTCACTGTCATTTACATCAGCCCTCCGTCGTCGTGTACTACCTGCCCTGTCCACGCCAAGTCAAGATTCTACCGCNNNNNNNNNNNNNNNNNNNNNNNNNNNNNNNNNNNNNNNNNNNNNNNNNNNNNNNNNNTATGGCAGGAGCGAAGGTCATGGTGAGCAGTGGGAAGACTGGGCCTCCTACCTGTAGCACCCGCCCATAACTCACCTGTCAACTC	3817:159:-
smaw_01_3853399	C01	3853399	80	-	G	A	ATTATGGGAAAACATGTGGCTTTTAAATATTGTACTGTTGGCTTAGAGGGGGGCCCAAAGTGTCTCTCAGAAAACTTTTCTAACANNNNNNNNNNNNNNNNNNNNNNNNNNNNNNNNNNNNNNNNNNNNNNNNNNNNNNNNNNNNNNNNNNNNNNNNNNNNNNNNNNNNNNNNNCGCCTCAGTCGTCCTCAACCGTCCTCAACTTTGTAAGATCGTGAAGTCTGGCAAATCGCCTCGGACCGCGCTCACTGCTGCGCCTANNNNNNNNNNNNNNNNNNNNNNNNNNNNNNNNNNNNNNNNNGTGAGAGGCTGCACCAATCACACCACATGGATGGAATTCTGTGTTCTTGTTAAGACGGATATTTTTTTTCGAGGGTGCTGCTTGT	3841:80:-
smaw_01_3853619	C01	3853619	161	-	A	T	ATACTCTGATGACCCCTCTGCGATGGGCCGACTCGTACCGATGTGTCACATAATGCTTCGCAGGGAGAAGTCGTTGGACTTGCTGNNNNNNNNNNNTGCTGTGCCCCGTCAAATCTTCCGTCTCTCCTCCTGCCGACAATGTTTCGTCGGCTTTAGGTCTTTACGCTGCGCAGGCCATTGGAGTGAATTGAATCCGCTGTCACGTTCCCG	3842:161:-
smaw_01_3858346	C01	3858346	44	-	T	C	GGGCACGGGAGCGTCAGCAGCCGCAAGAAACCACGTGAGCTGAAACAGGGAGCGACAGACAGCAGGAAGAGTTTGCAGTTTCACANNNNNNNNNNNNNNNNNNNNNNNNNNNNNNNNNNNNNNNNNNNNNNNNNNNNNNNNNNNNNNNNNNACGTTTTCCACAGGTGGCTTAGAATTGGTAGGTGAAATAATAATAGAAAAATGTCCACAGGCCTTATTTATATGTCAGGGGTCATNNNNNNNNNNNNNNNNTGAAGACTCCTCATTAATACTATCGACATTTGAAAAAGACCCCATGCCGTTGGCTCAGCAAGTCCTCGAAACTAAAGGGCATTTC	3845:44:-
smaw_01_3863160	C01	3863160	41	+	C	A	ACGGATTAAAAACCCACAGCGCACGTTGGGCACCAACACACTGCAACTATTCAGAGGCAGTTCGGAAGAAAGCTCGCTGTTGTTTNNNNNNNNNNNNNNNNNNGTGTGTGTGTGTGTGTGTGTGTGTGTGTGTGTGTGTTCTCATTGACAATGCAATGGTATTGGGCTTTGGCAGCCAGCTCTTTCTC	3850:41:+
smaw_01_3863540	C01	3863540	76	-	A	G	ATGTACCAAACAAAGCACTGAGCTGCTGCATTGTATCAAGTGATGCTTTGCAGGTGTGTTGTGATGAAAACCGTGTGTGGGGCAANNNNNNNNNNNNNNNNNNNNNNNNNNNNNNNNNNNNNNNNNNNNNNNNNNNNNNNNNNNNNNNNNNNNNNNNNNNNNNNNNNNNNNNNNNNNNNNNNNNNNNNNNNNNNNCATCCAAGCATCTATGGGTTTTAGTTATTTTCACTGTAGTATCATGCAAGTTAGGTCCACTATTTTTCTAATACTTGTCCTGAGC	3852:76:-
smaw_01_3879143	C01	3879143	235	-	G	A	GCCATGCCCTCACGCTGAAAGGTCCAGTCTGGCCGTCAAAGTTGTGCCATGCCGCTTGAAAGCCCGCCACCTATCAGACACCGCANNNNNNNNNNNNNNNNNNNNNNNNNNNNNNNNNNNNNNNNNNNNNNNNNNNNNNNNNNNNNNNNNNNNNNNNNNNNNNNNNNNNNNGTTAAATCTGCAACCCAGAGTCCAATTACATGGAAAGGGCTGCGAAGTATACGAGTCAGATTACGGACCCGTCTTCCCCAGAAATA	3863:235:-
smaw_01_3884023	C01	3884023	48	+	A	G	GGTCTCGCTTCATAGGATGCCAGACACAATCTCAGCTCAGAGAAAAAACGAAAAACATGGTCATTAATTTTCTTGTCCAAACCCANNNNNNNNNNNNNNNNNNNNNNNNNNNNNNNNNNNNNNNNNNNNNNNNNNNNNNNNNNNNNNNNNNNNNNNNNNNNNNNNNNNNNNNNNNNNNNNNNNNNNNNNNNNNNNNNNNNNNNNNNNNNNNNNNNNNGTTGAGCTCAATTAATCCTTTTACCTCGTGTTGGAGCTGCGGGAGCCTCATCCCCCCGTCCCACTCGAGTTGGGTATTCAAAAAATCCACCTGGTTTCCCGGGTCG	3871:48:+
smaw_01_3896017	C01	3896017	218	-	C	T	GACTTAAGCGGCGCCTCCAAATCCGCCATGTGATCAGTGCGCGGTGATGATCCACAAAATATCTCAAATGCTGTATCAGCATGATNNNNNNNNNNNNNNNNNNNNNNNNNNNNNNNNNNNNNNNNNNNNNNNNNNNNNNNNNNNNNNNNNNNNNNNNNNNNNNNNNNNNNNNNNNNNNNNNNTGGGTGTGTTTTTTGCAAGTGTGACTAAAGTGTATGAAGAATATTTACCCAAGTATTTATTATTATTTAGCTTTATCTAGTACAAG	3882:218:-
smaw_01_3898354	C01	3898354	72	+	T	C	GTCTCTCTCTTTCCTCGCGGCTCTTGTGTCACACAGTCCTATTGTCTGTGCCTGTCCTGATTCGGCGCCCATTACGGAAACATGTNNNNNNNNNNNNNNNNNNNNNNNNNNNNNNNNNNNNNNNNNNNNNNNNNNNNNNNNNNNNNNNNNNNNNNNNNNNNNAAGAGGACGAGGGGGAGACAATGGAACGATGACGAGGTAAATGAAGTAGCGCCTCGCGGGAGCTGACAGGCCGTTGCTGAGCACTNNNNNNNNNNNNNNNTTTAACTTCACCGTAGTTATTTGGTCTTTTCATGTTTTTCTCCGTGTTCCTCGTGCTGATTTTTTGTGAAGTTCTTGCATGAAAC	3889:72:+
smaw_01_3899485	C01	3899485	256	+	A	G	ACGGTTCCTCCGATCGATGCGTTGGAGTGAACACCCTTGAACACGTGAACATACGGTGCGACGGATGTGGGCCAAAGTGCCAAATNNNNNNNNNNNNNNNNNNNNNNNNNNNNNNNNNNNNNNNNNNNNNNNNNNNNNNNNNCGTTGGGCCTCATACAAGTGATATTTTAGATGCTTTTTTAAATAAAATAATAATCAAATCTAATACTAATCAAATCCAACATTGCATTGTCTCCATGTCGGACAGCAGAAAGGACGCGTTTCGCGGCGAGCGGCTCCGACCTGTTTAAGCATGAGTCGGCGTGAGTAACACAGTTCTGCCCGGCTGTAATCTGTCACG	3891:256:+
smaw_01_3944957	C01	3944957	297	-	T	C	ACACGAGCAGGTGGTTCTCTGTTGCCACGAGCGCTGTGAGTCAGGGTGGAACCGTTTGTTGGCCGAAGAGGAGGTCGCTGCTGACNNNNNNNNNNNNNNNNNNNNNNNNNNNNNNNNNNNNNNNNNNNNNNNNNNNNNNNNNNNNNNNNNNNNNNNNNNNNNNNNNNNNNNNNNNNNNNNNNNNNNNNNNNNNNNNNNNNNNNNNAACGCTTTTGGAAACTGTGGGAAAAATGAACATGGCAACTACATGAAGTGTGAGAAAAGGTAAGAAATGCTGGTGATAGTAACACATCATAACGCACACGCACAC	3950:297:-
smaw_01_3965879	C01	3965879	127	+	G	A	TCCCCTCAGCTTTGCACAGCTTTGCAACCTCATTCACCTAGTTTATTTTTTGTAGTCCCGCAAATTGACCATTCTGGTTCAGTGTNNNNNNNNNNNNNNNNNNNNNNNNNNNNNNNAGCAGCGGGCGGCTGCTTTCAGCTGCAAATCTCTGATAAAGCCATTGTCCACTATACCTGCTCAGCAGCAAACCGCAGGCGCACA	3961:127:+
smaw_01_3999277	C01	3999277	3	+	G	T	TGGACATCTCCCAGGTGTCATGAGACTGTATATAATAAAATGTCTTTTTATTTTCTAAGCACTTCAAAGACCTTGTAACAGTGACNNNNNNNNNNNNNNNNNNNNNNNNNNNNNNNNNNNNNNNNNNNNNNNNNNNNNNNNNNNNNNNNNNNNNNNNNNNNNNNNNNNNNNNNNNNNNNNAAATGCTAGATCCATGTTTTTATTTGGATCCACACCAAATTGCACACACTCGCAGATATCAGTCCCCTACTTATGCATGATTTTTTT	3976:3:+
smaw_01_4096475	C01	4096475	79	+	T	C	GACCAAGCAGCTGATCCTGTTGAAGCTGGAGGAGCAGGTGGAGACTAACCTGGGGACCGCCATGATGTACACCCTGTTTGAGTGGNNNNNNNNNNNNCAGGAGGGCCTCATGGAGAACCACAAGCCCGTAGTGACTGCTGTGGTGAGAACATTTCACCACCTCAGTTTTCAAGTTTTCAAAG	4030:79:+
smaw_01_4103400	C01	4103400	191	-	T	C	TGTATGGCGTGTAGCAAATGTTGCCCATTGACGTTGGAACCGTTGCGCGACGGCCGTGGTAAACACACACTGGCGTATTTTTAATNNNNNNNNNNNNNNNNNNNNNNNCATCGTCAACAAGCCCCGATTTGAAGTCCACCTTCGCCCTGTAAGCGTGAGACGTGTGCGCAATGTTTTAGCCGCAGAAAAGAACACNNNNNNNNNNNNNNNNNNNNNNNNNNNNNNNNNNNNNNNNNCATTGCAGATCGCCGTTTGTTAACACAAGCCTCCAGTGCAGGGGGACAATTGTCATTGTTGTTGACGCAAGAGCGAGCGGCGGCG	4033:191:-
smaw_01_4103641	C01	4103641	43	+	A	T	CCAAGCTCTTGGCTTCGGCATGAGTTACATACACCAAGCAGCATGTCCTTCACATAAACGAGCAAAGTTTGTTCATTGTGCTGTCNNNNNNNNNNNNNNNNNNNNNNNNNNNNNNNNNNNNNNNNNNNNNNNNNNNNNNNNNNNNNNNNNNNNNNNNNNNNNNNNNNNNNNGGGCTCCGAAAAAGGGACTACACTGACGCCGAATTTGCCACTGGACAATAAACACCCTTGGCTGATCTGCGTTACGTCATGAAACATAGGCACATCGGCGGCAAGCATCACAGGATCAAAATTCCGGATTTCCCTCAATGAGTTTTGCTTCTCACACACAG	4034:43:+
smaw_01_4128511	C01	4128511	9	-	G	A	CTCCCCTGCACATCCCCATCGCTTTCGGCAGTGTGAGAGCCAAGAAGACTCAGCCGCAGCAGGCTGCGGGAGAGCAGGACGCATCNNNNNNNNNNNNNNNNNNNNNNNNNNNNNNNNNNNNNNNNNNNNNNNNNNNNNNNNNNNNNNNNNNNNNNNNNNNNNNNNNNNNNNNNNNNNNNNNNNNNNNNNNNNNNNNNNNNNNNNNNNNNNNNNNNNNNNNNNNNNNNNNNGTCAGATGCAGTTAATGAGCACAAATTGTGGTTTTGGTCTGAAGAATGGTGTTTTGATTACTACATTACTACATCGCTTCATGAT	4049:9:-
smaw_01_4182323	C01	4182323	184	-	G	T	CACCTCTGCCACTCTGGCTCTGCCTCAATTGCACAGACACAGGTTAGAAACAGAGCGCCACCAACAGAGTGGGAGGAGTCATCACNNNNNNNNNNNNNNNNNNNNNNNNNNNNNNNNNNNNNNNNNNNNNNNNNNNNNNNNNNNNNTGCACCCATGTACACATTAAGGCACCCTCTCCAGATCCATCCCCATATCTCAACTGCTAGCATTACCACCCCACAAATATTAAACTC	4069:184:-
smaw_01_4205802	C01	4205802	24	+	G	T	GCTATGATGTTGAGATCAAGTATGCCCAGAACCACAAAATGGCTTTAAGCCAGGGTCTGGCAGAATGTCACCACTGCGACTGTGANNNNNNNNNNNNNNNNNNNNNNNNNNNNNNNNNNNNNNNNNNNNNNNNNNNNAACCACATTTACCACGACGAGAATGCCTGCTTAGACCTCCCAAGAGTCTACGTGGACGGCTGCTCAATACACCATGTGAGCCAGA	4082:24:+
smaw_01_4225224	C01	4225224	272	+	C	T	ATGATTCGAACTCCCGAAGCCAGTGAGCGGCTGTGAAAGAGGCTTTGAGGCCGTCGCTCTCACAGCTGTGTGGGGAACATGACATNNNNNNNNNNNNNNNNNNNNNNNNNNNNNNNNNNNNNNNNNNNNNNNNNNNNNNNNNNNNNNNNNNNNNNNNNNNNNNNNNNNNNNNNNNNNNNNNNNNNNNNNNNNNNNNNNNNNNNNNNNNNNNNNNNNNNNNNNNNNNNNNNNNNNNNNNNNNNNNNNNNCCGTTCTGCTGCTGGATCAGGGCCTGGTTGAGTGCAGACTGGGATGCAATAGCGGGCGGAGGTGGCTCTGCGGCTTGGCTTTGCTG	4091:272:+
smaw_01_4244324	C01	4244324	56	+	C	T	ACATCACCGCTAGCATGTCAGCTCGCCTGTGTTAGCATGTTAAGTTAAAGCTCGACGAGCCACAACATTTTAATCATACGTAGCCNNNNNNNNNNNNNNNNNNNNNNNNNNNNNNNNNNNNNNNNNNNNNNNNNNNNNNNNNNNNNNNNNNNNNNNNNNNNNNNGAAAAGGACCACCTCTTCTCAGGAAAGCGGTTTGCCTCAGCAGCAGGATGGGAGTGAGTCATGTCATGTCATGAGTAGTGTTCGACCGATATATCGGCCGGCCGATAATAATGGCCGATGTTTTGAGTTTTTTAGTGTATCGGCATCTGCCGATGCGCGGCTGCTAAGTTCGCAGATAGTTTTTTTTGGGAGGG	4110:56:+
smaw_01_4274500	C01	4274500	83	-	T	A	GCCAGGACGTGCGGTGGCGGGGAACATGCCTCGCAGGAGATCACTGTCATCCTCGGGAGAGACCCCGCCGAGCAGAAGAGAGAACNNNNNNNNNNNNNNNNNNNNNNNNNNNNNNNNNNNNNNNNNNNNNNNNNNNNNNNNNNNNNNNNNNNNNNNNNNNNNNNNNNNNNNNNNNNNNNNNNNNNNNNNNNNNNNNNNNNNNNNNNNNNNNNNGCACAAACTTCGTTCAATTATTTTGCCGTTTAACATTTTGCAGCTTTGCATATTCGGGGTACAGAAGTCAAAGCCGAGTCAGGTTC	4139:83:-
smaw_01_4280165	C01	4280165	62	+	C	T	CTCGACACCCGTTGGGGGGGAATCATGCGCATCTTCAGTCACATCCCTTCAAATGTCAGGCCGCGTCGCCGCTCTCTGCCCAGTTNNNNNNNNNNNNNNNNNNNNNNNNNNCCCGCCTGCTCGGACGTGTGGGGAATCCGCCCGCCGCCATTTCCATACGCGAGGAAAAATGAGAACTCATCAGGTGCGCGTCTTGCGGAGACGT	4146:62:+
smaw_01_4305343	C01	4305343	317	-	C	T	ATCAGACAGCTAACTCAACTAGTATTTTACAAAGTGGAGTTTATTTGATGAAAGTGGGTGCCGCTGTTGAATTGCACAGATGAACNNNNNNNNNNNNNNNNNNNNNNNNNNNNNNNNNNNNNNNNNNNNNNNNNNNNNNNNNNNNNNNNNNNNNNNNNNNNNNNNNNNNNNNNNNNNNNNNNNNNNNNNNNNNNNNNNNNNNNNNNNNNNNNNNNNNNNNNNNNNNNNNNNNNNNNNNTCTAAAGCAATATGTATTAAAACATTATTCCCCGAGACGTGCTAGCGACAGACGCTACGACTCAGGGGTTTTGGCACCGAGGCTG	4160:317:-
smaw_01_4333851	C01	4333851	79	+	C	A	GTTCGAAGCATCTGGTGCAGTGTTCTGTTTGGTCTCTCGACAGGACTCCCCTGCGGATGATAGGGAGTGGTACGAGAACGAGATANNNNNNNNNNNNNNNNNNNNNNNNNNNNNNNNNNNNNNNNNNNNNNNNNNNNNAAGTTTTCAGGGTAACCAAACCTCGGGTTTGTAATATTTTATGTTCATAGCATCCCTGGCTTTGCGAAGCGGAGGTAATCGACTG	4174:79:+
smaw_01_4339866	C01	4339866	18	-	C	T	CACAAACAATATTGCTCGTGAGCTCACGGACGCCGAAGCCCACATTGCCACGGGGCGACGTTGACGACACCTGACGAGCTCTGCGNNNNNNGCATCGTTCACTCAGCGCAGCCATTCGAGATAAGTGAGCTAGCGCGCTAAGCTAGCAAAGCAGCTAACTTTAGCGGCTAGCGGTTAGCTATTCACAAGCG	4180:18:-
smaw_01_4347877	C01	4347877	83	+	C	T	TGCAATTTCACCGAACATTTCCAGAGTGCCGTCCAGATTTACAAACGGCACTAGACCTTGAGTCTACTGACTCGTCTGAACACAANNNNNNNNNNNNNNNNNNNNNNNNNNNNNNNNNNNNNNNNNNNNNNNNNNNNNNNNNNNNNCTAACTGGGTCTCTACCACATGGTGGTATGCATTTGCCTTGACTCATATTTGTGGTCCTCCTCGAGCCGACTCAATCCCAATCCACTTCNNNNNNNNNNNNNNNNNNNNNNNNNNNNNNNNNNNNNNNNNNNNNNNNNNNNNNNNNNNNNNNNNNNNNNNNNNNNNNNNNNNNNNNATCTATATTCGCGTGACGCAATGTCGCAGAAGCCAATATGCGTTGAGAGGCTCCCGACGTCTGAAAGAGAACGGGCG…	4186:83:+
smaw_01_4366870	C01	4366870	28	+	A	G	AGACAATAAACACGTTGGTTTCTGAACATAAATTCACCGTGCACCTCTGCTCCTAAACACATAAAATATTTTTACAAACAAACGGNNNNNNNNNNNNNNNNNNNNNNNNNNNNNNNNNNNNNNNNNNNNNNNNNNNNNNNNNNNNNACCATAAAACCAGCTTGATAGCACGGCGACAGCTACGGTAAACATATTACAAGATCCAACGTTAATCTGTAAAAATCTGAAAGACATGAATGA	4202:28:+
smaw_01_4368962	C01	4368962	276	-	G	A	CATAACATTACAGCTTATAAAATCATAAGTTCACCTCCACACCTGAGGGTAAATTAGCCACGTGCTAACTGGACTCCAATTTTAANNNNNNNNNNNNNNNNNNNNNNNNNNNNNNNNNNNNNNNNNNNNNNNNNNNNNNNNNNNNNNNNNNNNNNNNNNNNNNNNNNNNNNNNNNNNNNNNNNNNNNNNNNNNNNNNNNNNNNNACTGCACACGCAAGCACTGTTAAATATGAAGAGATCGCTAAACAATCATACATTTCTCCATGATATTGCCACGTGCTAACCTCACACAGT	4204:276:-
smaw_01_4400566	C01	4400566	310	+	C	T	TTTTACAGCCCATGTGCATGTGCAGCATGTCTGTATACGTATATGGAGACCGTACTGCTCAAGTTCACGATGAAAAGCAATTATCNNNNNNNNNNNNNNNNNNNNNNNNNNNNNNNNNNNNNNNNNNNNNNNNNNNNNNNNNNNNNNNNNNNNNNNNNNNNNNNNNNNNNNNNNNNNNNNNNNNNNNNNNNNNNNNNNNNNNNNGCACGAGTGACTTCTACCTGGCTGTCACTGCTCCACCTTTTCACACCAAACACCCCCTCGCGCCCAGCAGCTCTCTCTCACACACAAGGTCCGTCTGTGTCACGTCCAAAAGCAGCGCCACGTGCCATTGCNNNNNNNNNNNNNNNNNNNNNNNNNNNNNNNNNNNNNNTCTGCGGAGTGACATTTAGAAGAGAC…	4219:310:+
smaw_01_4428726	C01	4428726	6	+	T	C	CTCTCTACATGCTGGCCAGCGCCCCCAAGCTGAGAGCTGTGGCAATGCGCCTCACGACTGCTCTCTGGAAGAAACAGGTCTGAAANNNNNNNNNNNNNNNNNNNNNNNNNNNNTGATACTGCGTGTTTAGACATTCTTTGTTTTCCCTGCTTCGTCTCGTACGTGTCTTCCTCACAACTGACTTTGTTCCTCTGTAAGGACCGAGTT	4237:6:+
smaw_01_4450609	C01	4450609	216	+	T	A	ACCAGACTTTTAGCATTCATGAGCTTAGTTAGAAACTGCACTGCCACTGTAGCTCTACTCCAATCACATGTGAGAAAGATGTCAANNNNNNNNNNNNNNNNNNNNNNNNNNNNNNNNNNNNNNNNNNNNNNNNNNNNNNNNNNNNNNNNNNNNNNNNNNNNNNNNNNNNNNNNNNNNNNNNNNNNNNNNTGTACCTTTCTGGCGGCATCTGGTGGTGAAGTTACGAACAGCAACCGACTGAGCATCCGACGGGACATTTTATGGTGGCGCACCG	4245:216:+
smaw_01_4460136	C01	4460136	164	+	G	A	GACGTTGGAGCCTCCTGCTGCCCAGACGCCACGGAGCGCTCCAGATATTGTGCTGCTGTTGTGAATAGATCTGACTTGGACTATGNNNNNNNNNNNNNNNAGGAGATGTTCTTGCTTAGAGGAATACTGCATGTTTGCCCTGACTTGTATTTTCCAGAGGAGTGCTACACTCTTCTGCTGCACAG	4252:164:+
smaw_01_4468890	C01	4468890	137	-	A	T	TTCCCTTTATTATCTCTGATGTCTCTCACCGTGAATTGCGGCACTTTATCTGAAGACTCACCCTTCAAAGACGCGGCCAGCGTCTNNNNNNNNNNNNNNNNNNNNNNNNNNNNNCTGGCGGCGTTACAGCCTATATTAGGAGTGCGCAGCTTGGAGACGCCAAAAGGCTCCGCTTTATTGTCCCTGACGCTCCTCAATTT	4261:137:-
smaw_01_4555586	C01	4555586	122	-	T	C	GCATCAGCTCTATGGCGAAATGGAAAACAAGCAAATTACAGAGCACTTCCACGGAGACGGTGGCCTTGTCATCTCAACCTGCCAGNNNNNNNNNNNNNNNNNNNNNGTAGTGCACTGGGAGAGCTGCCCTATAGCTTATCTGCCACTCCAGCAAAGAGACGGGAGACGGCACTCGAAGGTTGAACCCACGA	4325:122:-
smaw_01_4565989	C01	4565989	219	-	G	A	ACCTAATGTGTCCATCAACAGCAGCGAGACCAACTGAGTTCTGTCTCTAACTGTAGCATCTAATTCTCTCCTCTTTCTGCTTCCTNNNNNNNNNNNNNNNNNNNNNNNNNNNNNNNNNNNNNNNNNNNNNNNNNNNNNNNNNNNNNNNNNNNNNNNNNNNNNNNNNNNCCTCTCCAGTCCCTCCACGGCCGTTCCTCCCATCCCTGACACTTTCCCATCCCAGCGCCGATGGCCAGCGTGGCTCTCCGCTCCCCTCCGACACATACTGGGTTTTATTTAATTTGTCCGTATAATAGA	4333:219:-
smaw_01_4594713	C01	4594713	53	+	T	C	TCTTTATACAGCTTTTCTTCCTTTGCCAAAAATTCCAGTTTAATTTCCAGTATAAAGCAAAGTCGCTGCAAAATTAACAGGCAGCNNNNNNNNNNNNNNNNNNNNNNNNNNNNNNNNNNNNNNNNNNNNNNNNNNNNNNNNNNNNNNNNNNNNNNNNNNNNTACAGGAGGACCGATTCAGATGTCGTGAGGGATGATGTACTGACCCGACACAGCACTGGCTTTGCCGTAATAAATTTCTTGGCCG	4347:53:+
smaw_01_4618411	C01	4618411	221	-	G	A	TCGATGAACGCCTACCTGGTGGTCTACCTGTGCATTCTTATCAGCAAGGCCCTCATCAACACTTTACTGAAGTACGTGTGGCAGGNNNNNNNNNNNNNNNNNNNNNNNNNNNNNNNNNNNNNNNNNNNNNNNNNNNNNNNNNNNNNNNTCGTGAGTCTGTTCATCACAGTAATTGTCGGTCTAATAAATAATAAAAAATATGTGTTTCCGTCATCACCTCCTCACACTCCTCA	4365:221:-
smaw_01_4641113	C01	4641113	192	+	C	T	ATCACGGGGAAAAGCGAAGGTACATCACTGGGCATTAGCATGCACCGCGCCACTTCCGACAGTATGCATCAACCTAACCTCGTTCNNNNNNNNNNNNNNNNNNNNNNNNNNNNNNNNNNNNNNNNNNNNNNNNNNNNNNGTAACACGGTGAAGACATTAACTGAATCGTTATTGTCCTCTGACAAGTTCGGCGTATGTTTCCCGCACCACACAACCAGGATCTCATCAATAATCGAACGTTTTCACTGCTTGC	4377:192:+
smaw_01_4672652	C01	4672652	54	+	A	G	GATACAGTGGATGTGAATACACTGCACACATGCATGCACATGGATGTCTTTTGAATTGCGTGTATGTTGCGCGCGCACGCACGCANNNNNNNNNNNNNNNNNNNNNNNNNNNNNNNNNNNNNNNAGGCTGAATAGGTGCTGTTTTTCAGATTGCCATAATCACACTGAGCCCATTAACATATTAAATATCCTCCAACGCTCCAAAACAGACTAAATCGATGCTGGCAGCACTTTGTCCCTCACACATTAAAGCTTCTGTACACTCCCACACGGCTG	4389:54:+
smaw_01_4703924	C01	4703924	72	+	C	G	GGATCTCTGCACTATCCCACTCAGTGTTCTTTTCTCTTTGAAAAGTCCTTATGAATATTTGATCCCCGTGTCGGCCTCCACTTCTNNNNNNNNNNNNNNNNNNNNNNNNNNNNNNNNNNNNNNNNNNNNNNNNNNNCTGTCTGTCTGTCTGTCTGTCTCCTCTTCCTCTCCTCCTCTTCCTCCTCCTCACCTTGCTGGGGAAAAGAAACTGCTGGACTAGGGCTCTGCTGCACCCACCTCTCCAGATACTAAATTGATGACAGTGATAATGATGATGAGTAGAAGGAGGAGGAGGAGACCGGGTCGGCTCGTGGTCCTCTCGCGCGTCTCTGGTGTTTCCACGTCTTCATGCGCTCGA	4411:72:+
smaw_01_4715286	C01	4715286	64	+	C	G	ACAAGTTTATTTAGTGTGACTCATTTAAATGTATTAATTTAAAATAACTCACTTTTAAACCCTCAACTGAGTATTATTTTTATTGNNNNNNNNNNNNNNNNNNNNNNNNNNNNNNNNNNNNNNNNNNNNNNNNNNNNNNNNNNNNNNNNNNNNNNNNNNNNNNNNNNNNNNNNNNNNNNNNNNNNNNNNNNNNNNNNNNNNNNNNNNNNNNNNNNNNNNNGTGTACTCTTCTCCAGCTGGAGTCAGTCAGATCTCCTTCTGGCCTGGAGACCCCGAGGTCAGCATGCTGAGCTCCAAGTCCACAA	4421:64:+
smaw_01_4725874	C01	4725874	247	-	T	A	AGCTGGTGTCTTGTCATGATTCTCCCCCCGTGGAAGGCTCCTTCGTGACATCTTCATGGGGTTCATAACGATGGGTTTTTATGTCNNNNNNNNNNNNNNNNNNNNNNNNNNNNNNNNNNNNNNNNNNNNNNNNNNNNNNNNNNNNNNNNNNNNNNNNNNNNNNNNNNNNNNNNNNNNNNNNNNNNNNNNAGGTGTCACGACTGTGCCAATGAGGAAAAGCCTTCAGAGTAATGAGTGAGCAACAGGAGTTCAGGTGCAAAGAGCCGCAGTGCGA	4429:247:-
smaw_01_4729738	C01	4729738	173	-	C	A	CGGGAGGGGTGTAGCCTCGTGAAGTCACATTGTCTGGGACTGTTGCTGCGGCCTCTGTCGCCGCCCGCGCTACAAACTCTCATTCNTCTGGCACACGTCGTGAATTTGGACCTTTAATTCTTCAGCTGCACATTTACAGTGCGTGTGTGTGTGTGTGTGTGTGTGTGTGTGTGTGTTTGTTTGTTTTCACCCCCTCCCTCCTTTCTGCTACGTTACTTAGTTTAGCCGACCACCGCCAGGCTAGCCGCGATGACA	4431:173:-
smaw_01_4737953	C01	4737953	285	+	T	C	CTTTGAGCTGCTGGGTCAGAACTTTGCGGATCTCGTTCACCCATGAGGTTTTAATCTCTGGTGTCGGAGCCTGGACGCAACAAATNNNNNNNNNNNNNNNNNNNNNNNNNNNNNNNNNNNNNNNNNNNNNNNNNNNNNNNNNNNNNNNNNNNNNNNNNNNNNNNNNNNNNNNNNNNNNNNNNNNNNNNNNNNNNNNNNNNNNNNNNNNNNNNNNNNNTGTTGTCTCCTTTAGCACTCTCCGTTATGCCCACTGCGCTCATCTGGGAGAGGAAAGAAAGGAGAGATGTTCAGCGCAGAGTATTT	4438:285:+
smaw_01_4796089	C01	4796089	5	+	A	C	CTACAGCTTCAATCCAGTAAGGGATGCTTGAACTTGCACAAAGTGAGCTGTGTATGAGGAGATGTTTCAACAAAACAGCAGCACANNNNNNNNNNNNNNNNNNNNNNNNNNNNNNNNNNNNNNNNNNNNNNNNNNNNNNNNNNNNNNNNNNNNNNNNNNNNNNNNNNNNNNNNNNNNNNNNNNNNNNNNNNNNNNNNNNNNNNNNNNNNNNNNNNNNNNNNNNNNNNNNNNNNCGTCTTTGAGTTACCGTGTGTCTGCTGCATCAGTCCTTCCTTCCTGGTTTGGCCAAAAGGTCTGACTGAGGGTGGAGGCGACTTAAATGCAGAGGCC	4468:5:+
smaw_01_4847203	C01	4847203	44	+	C	G	AAATAATTTGAGTCCGCTCAGCCAGAGATCGGAGAGCTGACGTCAGCCGTGCCGTGACTTTCAAAAGTTCTCTGTGACAATGCCCNNNNNNNNNNNNNNNNNNNNNNNNNNNNNNNNNNNNNNNNNNNTATGCATAACCGACAGATGTTTTTATTTTCTTTCCCTTCGTTTCAGGCTGTTCGCTGCTACGATTCGCTCATCCTTAAGGCCGAG	4513:44:+
smaw_01_4852789	C01	4852789	151	+	T	C	TGGGTGGAGACAGGAATTTAAAGCGGACGGCGCTCATACCGTGGCTGTTTTGGATGCAGCTTCAATCTGATTATTACATGACGAANNNNNNNNNNNNNNNNNNNNNNNNNNNNNNNNNNNNNGTCTTTTTGCCCGAAGGCAGTATAACAGTTCGTGAAAACTTTGTTGACGTCCAGCATTTTAACAAGGCTCACGTCAGCGCGTTTCACAGCTGGCGTACCGGCGGT	4518:151:+
smaw_01_4855177	C01	4855177	233	-	A	T	TGTTTGAGGGCACAATAGCGTAAAAGTCGGCCCCTTTAAAGGCAAAGAAACGGTCCACACACCGAGAGCCTTACCGTTACCTGAGNNNNNNNNNNNNNNNNNNNNNNNNNNNNNNNNNNNNNNNNNNNNNNNNNNNNNNNNNNNNNNNNNNTGAAAATATACACCGTCTATATCTGCGAAAGTTTTATTCTCTCATCATTTAATCAAAGACATTAAGTCACATCTGACCCATTTCA	4523:233:-
smaw_01_4871080	C01	4871080	78	-	G	A	CCGTCGCTGTGCATGCGCATGTGTGTTTGAGAAGGTGTGAGGGTGGGAGAAATCACACACAGACCTGTCTGCGTGGTCATGTTGTNNCCTGTGAGGAAGAGTGACATTCCTCAAATGCAGCTTTTGTGTGTATGTGCATGACGTTCCGTGTTTTCTATAGGAGGGTGCATCA	4539:78:-
smaw_01_4877895	C01	4877895	225	-	C	T	GTAGGTCCTTCAAGGGTGGATACACAAGATCTTTTGTCCAATCGGACACCGTGTAGTTCTCACACAAAACCCCTCGCCGCACGGANNNNNNNNNNNNNNNNNNNNNNNNNNNNNNNNNNNNNNNNNNNTTTCCCCTGAGCGGCTCACACTGATTGCTGCGCCTCAGTCGTCGCAGACGACGTATCATCACTGCAAATCTAAATTGTTTGCTGCTTTTCAATTAAGTCGCACTTCAGCACTTTTCCTTTTTTTTCCCG	4554:225:-
smaw_01_4885148	C01	4885148	83	+	T	G	TGCGAAGCGGCAGTGAAGGTTAAAAACAGAGTCCTTGTGCACAACATCAGCCAGAATCTTGTGTTGTTTGTGTGTGTGTGTGTGTNNNNNNNNNNNNNNNNNNNNNNNNNNNNNNNNNNNNNNNNNNNNNNNNNNNNNNNNNNNNNNNNNNNNNNNNNNNNNNNGAATTCACGCCAGGCACGCAGAGTCCCGAGCCACGAAGGACTTTGCAAGAAAGGCTTGCGGCTTTCTCCAGTGTTGATGCTAATGGANNNNNNNGCCACCGGCACGTTTAGTTCCCCGTCGCCGCTTTAATTGCCTTTCTCATGTGTCAGAGTGGCATCTTCGTGAGGGATGATTATCC	4565:83:+
smaw_01_4888526	C01	4888526	55	+	C	G	GTTTTGCCTACAGTTACGGTACCAGCGGGCCTAGCAAAAGGATGAGAGCTCCTGCAACAGTCATAATTCATAACGCTTTGGAGACNNNNNNNNNNNNNNNNNNNNNNNNNNNNNNNNNNNNNNNNNNNNNNNNNNNNNNNNNNNNCGGCCCTCAAACCATCTGCCGCTCTGCTTTCCAGCACAAATAAGATGTCACTTCGTGGCGCGACACCAAACAAGGTGCAAAATCCTCTCAAAAAGGCCCGGAAGAAAAAAAAAAGCT	4571:55:+
smaw_01_4893922	C01	4893922	39	+	A	G	TGTGATCTTTGGGAACAAAAGGGAAGTCTAAATTGAATATCAAGCAACGCTGTACAGTCGGGTCAAAGTGGAGCAGACGGATTTGNNNCGTGGACTTGTCGGCGCGTGTTTACGTTGCAGTTAGCGGTTTTTGGGGGGGTTCGGGGGTTGAAGCGTGGCATTGGGGTTTGGTGNNNNNNNNNNNNNNNNNNNNNNNNNNNNNNNNNNNNNNNNNNNNNNNNNNNNNNNNNNNNNNNNNNNNNNNNNNNNNNNNNNNNNNNNNNNNNNNNNNNNNNNNNNNNNNNNNNNNNNNNNNNNNNNNNNNNNNNNNNNNNNNNNNNNNNNNNNNNNNNNNNNNNNNNNNNNNNNNNNNNNNNNNNNNNNNNNNNNNNNNNNNNNNNNNAACACTGGTTTGGCGCC…	4583:39:+
smaw_01_4901783	C01	4901783	241	+	A	T	TTCAAAGTAAAAGTTGGAGGTCCTCCGAGTTTCGGTCGCAGAGTTCAGAGCTCCAGAGCTTAGGTGGACTGAAAAATGATCCATTNNNNNNNNNNNNNNNNNNNNNNNNNNNNNNNNNNNNNNNNNNNNNNNNNNNNNNNNNNNNNNNNNNNNNNNNNNNNNNATGAGAGTTCTGTGTCAGAGAAGGGAGACGAGGTCGGGCCGTGGAGATTGATTCGCAGACTCCCTTACATTAACGTCACGTGCACACCCAGGATGGCACGTTGAAAAATTACACTACATGTATTTAGATGTATCGGTTTCAGACACATGGGCCCTG	4602:241:+
smaw_01_4913909	C01	4913909	46	+	T	A	GAGACGGAGAAGCCTGCGGATTCTGAAAAATGCAAACGGCGCAGATCTCTGCTTGCTCGCCTACGTTGAAACACACACACACTCANNNNNNNNNNNNNNNNNNNNNNNNCAAAACATCACACGCGCTCCCGAAGACACTGAGGACATCCTCGCCCTGCACGGCGCGCGACCCCGCCGCCGAGTCACTTGACCTTGTGTCTCCAGGGTCGACCCCCGTCGCTGATGACGTTCTGCTGCGCCTT	4628:46:+
smaw_01_4918852	C01	4918852	71	-	C	T	GGAAGAGCTGCGGTCCCAGCAAACACCCCCGAATACTGATCTTTGTCAAATCTTTGACCTCAGCCTCGGAGGAAAAAAAATGAAANNNNNNNNNNNNNNNNNNNNNNNNNNNNNNNNNNNNNNNNNNNNNNNNNNNNNNNNNNNNNNNNNNNCAAGGTCCATAGACTCGACGGCCGAGAGTCCAACGCCTTCAAGAGGATTTATTCCACGGCCACGGTCTGCTTTGCTGGACTGTGTCCGCTGATACCACCGGAGTATTTAGCAGTGGCGGCAGTAGGAGCAGCAAGCGTCTACAGAGCATCTGTT	4638:71:-
smaw_01_4933249	C01	4933249	206	-	T	C	ATGAAAAAGCAAGCAGACAGGGGCCATTTGCAGAAATCCTGCCCCAGGCCCCTGGGTCCCAGGCCCCTGGTGTTTCGGTGTTATTNNNNNNNNNNNNNNNNNNNNNNNNNNNNNNNNNNNNNNNNTCACCACATACATCTTTTACAAATGACACGCGCGCGTCCCACGCGACGTCAACAGAACAGTGTGTGGCACGATGACAAACACAGCAGAACCTAAACCACGCTCACTGAAAGCGACATTTTAACCAACNNNNNNNNNNGATTAATGCCATTATAACAAGCGTTAAAAAAATGTTCAAACTTACCCTGAGAAGTTTTCACGGCAGGTCTTGAGTCCGCTGCGTA	4651:206:-
smaw_01_4971425	C01	4971425	161	-	A	G	CGCTCTGACTGACTCGTAAAGGCCCCGTTTGATCCCCAGGTGTTGGTGAGCGTCTCCGACCGTGCAATTCAGGATTTCTATTTTCNNNNNNNNNNNNNNNNNNNNGGGGCATTTGTCAGATACCTGTTGTCGTTCAATATGATAAAGAATGTCTCTCCCCTGTCAGCCGTGTCAGTCAATGTGTCGGGGGNNNNNNNNNNNNNNGGCACAAGGCCCACAGCCCAGAAACATATAAAGCAAATACCTGAGTGGTACCTCACTCATTTCGCGTCTTTATCAAGTTACAGCA	4712:161:-
smaw_01_4974430	C01	4974430	194	+	T	C	TGTGACGGGGGGCCGAGGGGCGAGGAGGAACGACTCCTCAAACCTGGCGGAAGGCTTCGAGTGAACGCTCGAACGGGGGGCGGAGNNNNNAATTTTCCTTTTGTCGTTGTCTGGACTCTGTGGTTTGACCTTCGGTTGCCTCCGCCGAGTTTGCTGGAAAGGGCAGCGGGGGGGTAAACTGATAAACTGCAAATGGAATAATGCTGGTTTCGCATTCATACCTAAAAACACTCACGCTTTCAACAAAGTTGAGGTCGCTTGTCAGGGAAGTGGGAACACTGGTCGTTTCAGTTGTTGGACCGAATGTCTAA	4717:194:+
smaw_01_4982604	C01	4982604	162	-	G	A	TGCACTAAAAAAAGAGCCTTTTTATCCTCCTGTAAACCTTAAGGCTTCACAGAATGTGCTGTCGCTGCGAACTCCCGAACTCAGTNNNNNNNNNNNNACCACCAACATGCTGAGCATCTCCTTTGAACCCTGACCTCGCCTCGCCTCGCGCGCCTCCACATCTTACGGCCGCCGCCGTGACCTCGCGCCGACACTCGCGATTTCATGCTCCTGTTTGTTTGCGAAGTGACCAAAGTAAACGGCGGTGTGCGCGCCGGCGTCTCAGCTTCCCAGAGACGAGAGCTCTCGGACCGCTTTCCC	4723:162:-
smaw_01_4984042	C01	4984042	207	+	C	A	CCATAGGCTCATACGGGTTTCATCGGACGTGAGTGAGGAGCTCTTTCCACCCATCCCACGGTCATCCAGTTTCTTTTTCCCTAGTNNNNNNNNNNNNNNNNNNNNNNNNNNNNNNNNNNNNNNNNNNNNNNNNNNNNNNNNNNNNNNCACCCTGGGCAGGTTGCAAAGTTTGCAGTGGGCCGAAGACTTTGCCAGGATTAGAAATACACTTCACCCCAACAGACAACAATGCTGTCCATGTAGGCCGGCTGCCGTCGTTTACAAGCAGTCTGTTTCCCACCACGGAAAAATG	4726:207:+
smaw_01_5013692	C01	5013692	251	-	C	A	CAGGGGCCAAGTCATCGCATCATGGGACTTCCGTGGGTTTCTGGCCGTACATGTAGGAGCAAAACCCTCAAGCAATGTGAACAGTNNNNNNNNNNNNNNNNNNNNNNNNNNNNNNNNNNNNNNNNNNNNNNNNNNNNNNNNNNNNNNNNNNNNNNNNNNNNNNNNNNNNNNNNNNNNNNNNNNNNNNNNGCTCACTGTATGGATTCATGCGGGGACCAGACAGAAAGCCGAGCCTCCAACCAGCGACTCAGTTGTGCAGCGATCTGAGGCTCCCAG	4761:251:-
smaw_01_5035687	C01	5035687	69	+	G	T	GTGTTTTCATCACGCAGACGGAGCTGGGTCATTCCGCAAGAGGGATTTTGGTGTGTGTGTGTGTGTGTGTGTGTGTGTGTGTGTGNNNNNNNNNNNNNNNNNNNNNNNNNNNNNNNNNNNNNNNNNNNNNNNNNNNNNNNNNNNNNNNNNNNNNNNNNNNNNNNNNNNNNNNNNNNNNNNNNNNNNNNNNNNNNNGTCTCCTGACCTTCACAACCAGCTCGCCACCTGTTCTCCTGTTATTTCTGCCAATATTTCTGTAAGTCCTTGTTCTCTCAGCTCT	4783:69:+
smaw_01_5060632	C01	5060632	249	-	C	A	CTAGCAGGGCTGCTAACAGTTATCAGGACGTGCACATGTCGGAGCCTTCGCTGAGCATCCTGACCCACAGCGTGTTAAATTATTANNNNNNNNNNNNNNNNNNNNNNNNNNNNNNNNNNTCTTTTACTTAAACATGTTCCTGGCTCTTGACCCAAATAGTGAGACAGCCATTGCTTCCGTGGCCAGAGGTGTCTCCAAAAACCAGGCCATGAGAGTTCCCCTTTGGCCCCCCCTTTGGTGTGATCTGATCAGCAGCAGGGGTTCACTTGCGGGTGCAGCCGGGGTACGGAGGAGGAGGGGA	4805:249:-
smaw_01_5072460	C01	5072460	284	-	G	A	TGCAGTCTGTGTTAATGGGGTAGAAACTAAGAAGTGTTCTGAAGAACTGATGGTGCTGACTGCGATACACTTCAAATACACACTTNNNNNNNNNNNNNNNNNNNNNNNNNNNNNNNNNNNNNNNNNNNNNNNNNNNNNNNNNNNNNNNNNNNNNNNNNNNNNNNNNNNNNNNNNNNNNNNNNNNNACCAGACGGGGGTTATTCAGGATGTGCGACGCTCGATTCCCACACTGCCGCCTGCGAGTGAGCAGCGCTGACGGGCACAGAGCAAACCCCGTCCCACTCGTTAATCGGACGTCCCGGGAGCNNNNNNNNNNNNNNNNNNNNNNNNNNNNNNNNNNNNNNNNNNNNNNNNNNNNNNNNNNNNNNNNNNNNNNNNNNNNNNNNNNNNNNNNNNNNN…	4816:284:-
smaw_01_5072764	C01	5072764	13	+	C	A	TCACACTCATCTCAAGAGAATATGACAAAATCAGAAGCATCAGTGGATCTCATTACATTCCTGTGGAAAGCAGTCAAGGGTTTCANNNNNNNNNNNNNNNNNNNNNNNNNNNNNNNNNNNNNNNNNNNNNNNNNNNNNNNNNNNNNNNNNNNNNNNNNNNNNNNNNNNNNNNNNNNNNNNNNNNNNNNNNNNNNNNNNNNNNNNNNNNNNNNNNNNNNNNNNNNNNNNNNNNNNNNNNNNNNNNNNNNNNCACATTTTTGGAATCACTCAAACATTCCCGATGTCAGCCGTGAGCAGGGAATGTGAACCGACAGAGGCCGTACGGTCCTAACATT	4817:13:+
smaw_01_5097857	C01	5097857	297	-	C	T	CAACACCCAGATGAAAGACATCATGTATCATCAGAGTTGTTTGAGCTTGAGCTTTTTGTGAACCAGAAGAAGTAGAAGTTCCGAANNNNNNNNNNNNNNNNNNNNNNNNNNNNNNNNNNNNNNNNNNNNNNNNNNNNNNNNNNNNNNNNNNNNNNNNNNNNNNNNNNNNNNNNNNNNNNNNNNNNNNNNNNNNNNNNNNNNNNNNNNNNNNNNNNNNNNNNNNNNNNNNNNNNNNNNNNNNTACAACAAACGTTCCACGAAATGAGTGCGTCGGGTGGCGTGGTGGGTTCGTTCACGGCCTCATGTGCGGTTGTGTCCTATTCAAAG	4837:297:-
smaw_01_5107917	C01	5107917	266	-	T	C	TCCTTTTGGATCTCCCAGTGTCACGGTGCAGCCCACATCAGCAGCCAAACCCTGCACAGAACAGAGGACACGTGAGTGTGACGACNNNNNNNNNNNNNNNNNNNNNNNNNNNNNNNNNNNNNNNNNNNNNNNNNNNNNNNNNNNNNNNNNNNNNNNNNNNNNNNNNNNNNNNNNNNNNNNNNNNNNNNNNNNNNNNNNNNNNNNNNNNNNNNNNNNNNATGTATCTAAGTTTGCAACAGCATTTAAAATTTTCAATCAGGACATTAGAAAATAATTTTGGCTCCTTTTTGCTTCCATATATTATTATCAAACGTCCCGTCTCCAACGCTGCCGTCACCGGTTTTAATACCGTCC	4840:266:-
smaw_01_5151814	C01	5151814	206	-	T	C	TCAGTGCAAATTGAATCAGGGATGGATGAGGATGTAAAACCACGAGAGAGGGGTGGTGGAAGACAGGCAAGCAGACAGACAGACGNNNNNNNNNNNNNNNNNNNNNNNNNNNNNNNNTGGCAGTGTGTCTCGTCGTCTGCACCCCACCCATCCTCCTTCGGGCTCTGAGTGGCTTTCTTTGCGAATTGGTCCTTGTGGCTGCTGCACTCGCGCTG	4894:206:-
smaw_01_5158537	C01	5158537	273	-	T	G	CTCAGTTTGGGACGGCGTCCAGGGCACAGCTTCAGCACCAGCTCTCTCTATAACACACTCACACACGCCCACCCACACAGTTTCTNNNNNNNNNNNNNNNNNNNNNNNNNNNNNNTGCCTACGCATCATGCTCTTCTTCTTCCATTTTACTATGCACGCACAGGCAAACACAAACACGCCCCTTCGTCAGTCTCGGTGGCAGTGTGCGTAAAGCTCTAATTAGTTTGGTCAGCTCTGAGGTTTTTCTTTCNNNNNNNNNNNNNNNNNGTATAATGTTGTTCCTCTGCTCTGGACTCAGGGGCTCGACAGATCTGTTTGTGTGCGCACCAGTGTTTGTGTATTTCTCTGGACA	4901:273:-
smaw_01_5171124	C01	5171124	246	+	A	G	CCAACGCTAAGCTCAAGTCAGTGGCTCATTGTGTCTGTGTGAATGACCCTGGGGGAACACCAGCTCCCGCTGCACTGCATACATTNNNNNNNNNNNNNNNNNNNNNNNNNNNNNNNNNNNNNNNNNNNNNNNNNNNNNNNNNNNNNNNNNNNNNNNNNNNNNNNNNNNNNNNNNNNNNNNNNNNNNNNNNNNNNNNNNNNNNNNNNNNNNNNNNNNNNNNNNNNNCGAGGATTCCTATAGATCCGAAAAAATTCAAATGCAAAAAAAGCCTCGAGTGAGGAAGTAACAATTAAGTCAGAGGAATCTCCTA	4911:246:+
smaw_01_5173461	C01	5173461	209	-	T	C	AACTCTTGTCCCTCACACACACACACACACACACAACCCAGAGACAGAAGGGGAATACAGGATTCTCTGTGCTTTTTAAACTCCCNNNNNNNNNNNNNNNNNNNNNNNNNNNNNNNNNNNNNNNNNNNNNNNNNNNNNNNNNNNNNNNNCATTAGGAAATGTGTTTCGCTCCACGGCAGGCTGAGTTCCACCCAATTACGCCTGTATCATCTTCCTGGGTCCTCTCATCTGATAAGGGCTATCATGCCGGTGGTGGTGTTCC	4913:209:-
smaw_01_5179620	C01	5179620	141	-	C	T	TTGTGCACGCGGACTTATCTCCAAGGTGAAAACAGGGTGCTGGATGTTCCCTTCCTTCCTACCTGCAAACCATCTGTCTGTTCTCTCCCCCTCACAGCCAGCAGCGTTGTCCCCGAAGAAGCACGACTTGCGAGGCAAGCGGCGTAAACCGAGCCAGGTCGGCGTGCAGCA	4919:141:-
smaw_01_5202697	C01	5202697	170	-	A	C	GAAATGTCCGTGCTTCCTTTTCACTGTCCTCGCAGGAGGCATTTCGTGAGCAGCGGTGCCCTGAGGCCTACCTGGAAGCCGTTTGNNNNNNNNNNNNNNNNNNNNNNNNNNNNNNNNNNNNNNNNNNNNNNNNNNNNNNNNNNNNNNNNNNNNNNNNNNGATGTTCAGTTGTGGAAGGGGGGGGAACTCACAAACTTTAATTTGCGGCAGGCGGCGTGACTAATTTCTCCAGCGAAGGGCGTTANNNNNNNNNNNNNNNNNNNNNNNNNNNNNNNNNNNNNNAGTTTTTTTAAAAAGATGCTCGATAAACTGGAGGGGAAACTTCTGCTGCGTGATGATGATGATAATGATGATGATGAGCTTAGCT	4936:170:-
smaw_01_5202875	C01	5202875	1	+	G	A	GGCAAAGAATACGCTCCGCCGCTCACAAGGAAACACAAGGGTTGGATGAGAAAACCCGTCATTTGTGCCAACAGCAGGGGGCCAGNNNNNNNNNNNNNNNNNNNNNNNNNNNNNNNNNNNNNNNNNNNNNNNTTCGATCGCCACCTCGGCGGGGTTGGTCTTTACAATAAAGGTGTTGCCGATGGGTGTTGGAGAGTACACGAGGGAAAAGGAGTAG	4937:1:+
smaw_01_5217269	C01	5217269	138	+	C	T	GAGAAGCTTTCAAGAGAAAGGCCCTGGCTCGGTCCTTCTACGGTTTGGCGGAGAAAAGAACCAAACTACTTGCTGGATTTTCCAGNNNNNNNNNNNNNNNNNNNNNNNNNNNNNNNNNNNNNNNNNNATGGAGTGGTCCTACAAATCCCAGAGGTTCAATGAACTCGGGTTGAAGACGTTTTAGAATTTGTTTGTGTCTGTGTGCGTGTGCGTGTGGAGCACGGCCGGAGTGGATTTGGCTTTCACTTTTCA	4946:138:+
smaw_01_5220979	C01	5220979	29	+	A	G	CATTTTAGAGTCATTAAACTATTTAGGTATGTAGCCTCACCACACTGTCTCCCCTCCTCTGCTCTCTCTTTCATTTTCCCTGTTANNNNNNNNNNNNNNNNNNNNNNNNNNNNNNNNNNNNNNNNNNNNNNNNNNNNNNNNNNNNNNNNNNNNNNNNNNNNNNNNNNNNNNNCCCCTTAATTGTCCAAATCAATGTGCAGCAGTCGCTCTCGCCGCGATTAGGCAGAAAATTGGGTTATGCGGCGGCAGTTGCCATGGTTTCAAGGCAGCCGCCGACTTCTAAAAAAGATCTCCAGCGAAGCCGCGGAGTGGCACAGTATAATGAACTTAAATTAAAGCAACTTCTTTTTTATCTCGATGTA	4950:29:+
smaw_01_5228773	C01	5228773	219	-	C	T	GTAAAGCAAGAGACGTGACAGCTCAGGGGACACGGAGCGAGATTACCTCCTGAGCGCATGTGGCCATGTCTTACATTTTTGTGTGNNNNNNNNNNNNNNNNNNNNNNNNNNNNNNNNNNNNNNNNNNNNNNNNNNNNNNNNNNNNNNNNNNTCTCACATCCCCTACAACCCAGCCTCTCTGCTCACCTCGGGGGGAGAGGATGCGTAGGCGATGCTGAGCTGGTGGGGACAAGCAGNNNNNNNNNNNNNNNNNNNNNNNNNNNNNNNNNNNNNNNNNNNNNNNNNNNNNNNNNNNNCCTCCCGCCGTCCGCCAGCGCACATCCCCGACCACTGCCGCGCTGAGGACATCAAACGGTAAACTTCCACCTGCCCGCCGAGATA	4959:219:-
smaw_01_5235320	C01	5235320	162	-	A	G	GCACATGGCACACAGAACACACTCCCAGTGAAAAGGTTCCAAAGAGGAGAGAAAAGCTCTGTCGAGGATAATTGACTGAAATGTGNNNNNNNNNNNNNNNNNNNNNNNNNNNNNNNNNNNNNNNNNNNNNNNNNNNNNNNNNNNNNNNNNNNNNNNNNNNNTGTGTGTGTGTGTGTGTGGGGTCACACCTAAGCCAACACCCCGTGGCCTCCTGCACATTCATCAGATTGATATTAATATTCATGA	4963:162:-
smaw_01_5238754	C01	5238754	195	-	A	T	CTGCTGTGCCAAAATCCCTTTCGAAAGGATGAAGCCGATACTGACAACAAACACAACACGAGCCGCGGCTTTTCGGCCACATCAANNNNNNNNNNNNNNNNNNNNNNNNNNNNNNNNNNNNNNNNNNNNNNNNNNNNNNNNNNNNNNNNNNNNNNNNNNNNNNNNNNNNNNNAGATCCTTCCACAGTCCCCATGTCTCATCTTCTCCTACCGCACCGATTACGCACACACTAGTGATTAGAAGAGGAAGTCCGCAGAGCACGGCGC	4965:195:-
smaw_01_5245545	C01	5245545	19	+	T	G	ATGAGAACACTGACACTGTTCTCAGTGCAGTCGGGCGTTGCAACACTTCAGCGGTGTAGCAAAGCAACTGTCGGCAGTCACTTGTNNNNNNNNNNNNNNNNNNNNNNNNNNNNNNNNNNNNNNNNNNNNNNNNNNNNNNNNNNNNNNNNNNNNNNNNAAGACATTAATGGGGTTACTAACAACGTAGTCAGTGTTCCTCCACTGTCAAGACGTCTGCTGTGAGAAATGGGCGAAAGTGTGAACAT	4970:19:+
smaw_01_5256619	C01	5256619	102	+	A	C	GACTAAGCAGAACCCAGGCGTCAGCAAGCGGCGACTTAACGCGACGACAAAGAGCCCATATTTCATGTCCAAAAAAGCGTCGGGCNNNNNNTCCTTCAAGCAGTAGGGTGTAGGGAAACGCAGCCCACGTAGGTGATGACGACAGGAACAAGGTATCTCATGTTAAGTTCTTGGTT	4986:102:+
smaw_01_5266768	C01	5266768	249	-	C	G	CGGCCATCTTTAACTGCCGCACCTCGCGACAGGATGTTCTTCACCAGGATTGGCCCTGGCCCATGGACCGAGGAGTCGCGCGTCANNNNNNNNNNNNNNNNNNCCTCAGCGCCTGCGGGGGAAGAAGAAAAAATCAGCCTGTGTCACGGTGTGCACTGGGGACATGAATAACCCCGCAGACAAGACTTNNNNNNNNNNNNNNNNNNTTTTTAATTTTGTTTTAATTGAATGTTCCCCCTCGTCTCCCTGTTCTGTCACTTCTCCGTCTCCGCTTGCCACCAAGTTTTCCCCTCTCTCCTCCTCTCGCNNNNNNNNNNNNNNNNNNNNNNNTTTTTAGAATCACCCTCCACATTAACGACAGTTTAAGTGCCTGTTTTCCTCAGGGGGTTTAGTTGCCTG…	4990:249:-
smaw_01_5293411	C01	5293411	144	-	C	A	CGGCGCGAAACGTCCTGGCGAACAGGAAACACGCACGTGGAAAAAATGAAACGCACACTTACACCACAGGCAAATGAGACGCGGTNNNNNNNNNNNNNNNTCTACGTAGCTCAATGTGTGTGTGCGTGTGTGTGTGTGAGTGAGTGTGAGCGCTGTTGGATGAACTCCCAGGTGTGTTGTGAGAG	5012:144:-
smaw_01_5304294	C01	5304294	47	-	G	A	GCATTAACCAACCGTGCGGGATTAGGTAACGCACCTACAATGGACCCCCGTCACAGCTTAGAAACCCCCACGCAAACATGTCAGANNNNNNNNNNNNNNNNNNNNNNNNNNNNNNNNNNNNNNNNNNNNNNNNNNNNNNNNNNNNNNNNNNNNNNNNNNNNNNNNNNNNNNNNNNNNNNNNNNNNNNNNNNNNNNNNNNNNNNNNNNNNNNNNNCCCTGTATAGCACTTTCACACACGATCTCCGACAAATAAAAGCGATTCGCGCCGTAAGCCCCTTTTCACTCCGCCACAGCAAAAC	5022:47:-
smaw_01_5304423	C01	5304423	75	+	A	C	TGGATTTCTTTGATCCACCATCTCATCTGCCATTTAAGGGCTTTTAGCGGCGCTGGTGTGGAGCGGAGCCTCCGAGAGAGTATTTNNNNNNNNNNNNNNNNNNNNNNNNNNNNNNNNNNNNNNNNNNNNNNNNNNNNNNNNNNNNNNNNNNNNNNNNNNNNNNNNNNNNNNNNNNNNNNNNNNNNNNNNNNNNNNNNNNNNNNNNNNNNNNNNNNNNNNNNNNNNNNNNNNNNNNNNNNNNNNACTCTCTTTGCAACAACTTGACACATGTATGGAACACACGGCTGCGGCTTACTGATCAGGGCCGCCTTAAATGCGTTGACTCGCGC	5023:75:+
smaw_01_5327135	C01	5327135	69	+	G	A	CACTTTTGTGGACAGAATTTGATATTCCGTTGTGCTTACTGGTGAGATTGGTTGGCTCCCACTGTGTCGAAGCGACTGGCCATCTNNNNNNNNNNNNNNNNNNNNNNNNCTCTTACCCACACGCCTTCTGCTGTGCACAATCCCGACTCCTGTCTCTCTCGCCGAAAGACGCCGACTCACGCAGAGCACAGGTGTAATGGATGTGCTGGCAGGCTCGTCCCGCTGCGGGCCTCCTCTTGGGGCAAGCTGCCACCA	5050:69:+
smaw_01_5330490	C01	5330490	160	-	T	C	TTGCCCGCAGGCCAGAGACAAGCTGTGGGGATAAAGACCGACGCCGAAGAAGTCCCCGTAGGCGTTTGCCGATCCAGATGGGGAGNNNNNNNNNNNNNNNNNNNNNNNNNNNNNNNNNNCACTCCTCAACCGCTCGCTGTGCAGCATTGAAATGAAGTGACTTAAAACAAAAGAGAGGCAGGGAGGGAGCGGAATGTGCTGGGCNNNNNNNNNNNNNNNNNNNNNNNNNNNNNNNNNNNNNNNNNNNNNNNNNNNNNNNNNNNNNNNNNNNNNNNNNNNNNNNCGAAAGAGAAAAGAGGGAGAAAGGGGCTAAAACTCTCGATAGCAGCGGCGAAAAAACACAATGTCTGAATGACATGTTCGCTCTT	5052:160:-
smaw_01_5346667	C01	5346667	313	+	A	G	CCGCGAATATCCTCGAGGGGAAGCCTGCTCACACGCACGAGCACGGACGCGCGCCGCCTGAGCTGTGTGCGACCTAATCTGTGCTNNNNNNNNNNNNNNNNNNNNNNNNNNNNNNNNNNNNNNNNNNNNNNNNNNNNNNNNNNNNNNNNNNNNNNNNNNNNNNNNNNNNNNNNNNNNNNNNNNNNNNNNNNNNNNNNNNNNNNNNNNNNNNNNNNNNNNNNNNNNNNNNNNNNNNNNNNNNNNNNNNNNNNNNNNNNNNNNNNNNNNACACACTTTACCATTTGGCCGAGTTTCTTCTGGGCGATCTGTACGAGAGACCAGTTTTCCATAATCGAGTTGGAAAATGGGTGGAAC	5061:313:+
smaw_01_5361147	C01	5361147	83	-	T	C	GTAAATACGACAATCTGCCTGAGCCCCGTTGTCGTTTTCGCTTCCACCTCAAAAATCCTCCGCCGCTGTGGGAAAAGAAAAAAAANNNNNNNNNNNNNNNNNNNNNNNNNNNNNNNNNNNNNNNNNNNNCAGATATGGAAGAGGAGTGGAATGCATCGCCGTTCACAGCCTCCCGTCCCACATCATATCCGTCTGCTCGGCTCGCGGCGACTGT	5076:83:-
smaw_01_5369033	C01	5369033	231	-	G	T	TAGAAGCCAGACAGACAGAGAGGAAACCTCAAAGCAGAGCTGTGCAGAAACGCAGCGTTCCGATTCAAGGGAACATCCTTAAGGANNNNNNNNNNNNNNNNNNNNNNNNNNNNNNNNNNNNNNNNNNNNNNNNNNNNNNNNNNNNNNNNNNNNNNNNNNNNNNNNNNNNNNNNNNNNNNNNNNNNNNNNNNNNNNNGTGGCCTGGAGTGTACAGTGACGCCTCATGAGCTCATTTCAGTGCAGGATGATTCATTTGCAGTACACGGCTGAGCCTAGTGGGGG	5086:231:-
smaw_01_5374637	C01	5374637	170	-	G	C	TTGATCACTGTACCTTCTGGTGTTAAACTCACATCTAGATTTGGTGCTGAGCATTGCGCTCTTCCTGGTATAGGTGAAATGTGGANNNNNNNNNNNNNNNNNNNNNNNNNNNNNNNNNNNNNNNNNNNNNNNNNNNNNNNNNNNNNNNNNNNNNNNNNNNNNNGAGTCCCCACCACCACTGCCCCCTAATCTCCCCGCTTATTGTTATTTGATTGCCGAGAGTGCGCCGAGGTGACGGCTGCGCGCCGCCGCC	5091:170:-
smaw_01_5384424	C01	5384424	43	+	G	A	ATCCGAGCGATAACCCCCATTTCAAAGGCCCATTAGAGAGACGGGAGATTGCGCCAACATTTATTTACGCATAACCTCTAAAACTNNNNNNNNNNNNNNNNNNNNNNNNNNNNNNNNNNNNNNNNNNCCTCTGGGGGCGCAGACATAGCAGCAGAAATAAGCTGAAAAAGCCAAAGTACAGCTCGATGTTCCTGCTCTCTCTCCGTCCTGGGTNNNNNNNNNNNNNNNNNNNNNNNNNNNNNNNNNNNNNNNNNNNNNNNNNNNNNNNNNNNNNNNNNNNNNNNNNNNNNNNGTGCGATTAGGCACGGCGGTGTGAGCGAGCGAGTGAGCGGAGAGCCGATTTTTGCATTTCTTTCACGGTCCCTTCTGCCAGGTTA	5104:43:+
smaw_01_5398105	C01	5398105	288	+	G	T	GCTGGAAATAACAATGTCCAGTGCAAGTGCACTTATAAATACGAGACATCAGTCGGTTTCGGAAAGGCCACCGCCACAGGCATTTNNNNNNNNNNNNNNNNNNNNNNNNNNNNNNNNNNNNNNNNNNNNNNNNNNNNNNNNNNNNNNNNNNNNNNNNNNNNNNNNNNNNNNNNNNNNNNNNNNNNNNNNNNNNNNNNNNNNNNNNNNNNNNNNNNNNNNNNNNNNNNNNNNGGGAGACTGCAAGTGTGCGTGTAGGTGTGATATTTGAGTAAAGTCCTCGTGTGTGTGTGCGCGCGCGTGCTGGACCGCCAGCACC	5118:288:+
smaw_01_5410084	C01	5410084	52	-	C	A	GACGAATGGTGGGAGAGAGGAGTGGGAGACTGAGGTGGATGAGCACCGAGGGTGGTGGGGGGTTAAGGGAAGAGGAAGTGATGGANNNNNNNNNNNNNNNNNNNNNNNNNNNNNNNNNNNNNNNNNNNNNNNNNNNNNNNNNNNNNNNNNNNNNNNNNNNNNNATCAAAGTTTCATGCTGTTATGTCACGGCAAAGGCAGGAGATTTCAATAATGAATCAAAGGCACAGGAAGTGCAAGTGTGTGTGTTCGTGTGTGTGTGCGGGTGGGTGCAGTCTGTGTACATCTCGAAGGGTGCGCCTGCATGTGAGGTCATCTGCTATATTT	5125:52:-
smaw_01_5419229	C01	5419229	15	+	T	C	AGACCGCTGTGAAATGGATTAATAATGCTCCGTTGTGCTGTGTACGGCGAGGCTGTCCCGATTATGAGCTGTCTGGCAAACAAGANNNNNNNNNNNNNNNNNNNNNNNNNNNNNNNNNNNNNNNNNNNNNNNATTAGACAGGGAGACGGCGGAAGAGGCTTTGGTGCGCACATTATGACGAGTGATAAAACGCCTCACGGAGTCACAAATATGTTTCGC	5133:15:+
smaw_01_5419932	C01	5419932	52	+	A	T	TTGTTGATACTGGACATTTTCCCACAGGGCCCACTTAAGAAATTCTTTACCAGACGCCTCATTGAGTCACTCTTTTTCTCTCGCTNNNNNNNNNNNNNNNNNNNNNNNNNNNNNNNNNNNNNNNNNNNNNNNNNNNNNNNNNNNNNNNNNNNNNNNNNNNNNNNNNNNNNNNNNNNNNNNNNNNNNNNNNNNNNNNNNNNNNNNNNNNNNNNNNNNNNNNNNNNNNNNNNCGTTGCAGTCATTTACCTGGAAGCGAATGAAGAGGAATAGGCCCCGAGGGTCTCGGTCGGGGTTCTGGTAGCACTCCATGTAGGA	5135:52:+
smaw_01_5422856	C01	5422856	147	-	T	C	GGGCTGGGCCGTTTTGGCTTGCTGAGAAATGCACAGAGCAGAACCTTCACTTTGGTGGCCTGGAATGCAAATACAAAGAACCGTTNNNNNNNNNNNNNNNNNNNNNNNNNNNNNGGGTAGTGTTCGAGAGACAAAGAAAGAAGGGAAACCGACTTGGGGACTTGCGCCTTTTGGCGGGAACGCCAACGCAACTGTGAAG	5137:147:-
smaw_01_5452640	C01	5452640	55	-	G	A	GCAGGAAACCCCCCCAGGCGAGTGTTTAGATTTGGTTCTGCGGCCCCAAGGAGGCCAGACGCCAGCCACGGTGCATGGCGCTGATNNNNNNNNNNNNNNNNNNNNNNNNNNNNNNCTGAGGTGTTTTTAGGCCCGCAGTGCAGAGGTGGGAGGGTTGCAAGACAGCCAGGGCAGAAGAGGGAAGCAGCAGACCAGGTTTGTNNNNNNNNNNNNNNNNNNNNNNNNNNNNNNNNNNNNNNNNNNNNNNNNNCAAGGAGGGAGCCCCAGAGACACAACACGGATGTCTGTGAGGAAGCCGACGGGGGACTTTGTCTGTGGTGCTGGCCGACTTCAGG	5169:55:-
smaw_01_5456765	C01	5456765	35	-	G	A	AGGTCAGACAGAGAGATGATGCCCCTCACCACATCAGCCCTGTCCACCAGGACCAGCCGATGGACCTGGGATGAGGAGGGAAAATNNNNNNNNNNNNNNNNNNNNNNNNNNNNNNNNNNNNNNNNNNNNNNNNNNNNNNNNNNNNNNCCGCTTTAACAATGCGGTCTATGATAGTTTCCAAGGATTCCTCGGGATAGCACTTGATTACTCCCTCGACGAAACATGAGCGCCTGCGAACGACCTCCCGCATGGTCATGTCCAGATTGTTGTAACTCTTCTGGGCGGCGAGATTCTGCCC	5171:35:-
smaw_01_5481929	C01	5481929	208	-	G	T	AATTCTAGCTTGGAATTCCCACTGGGATGAGATTCCCTGTCCCAAACTTAGATGTTGGGATCAGTTTTCAGGGTGATTACCCAGANNNNGGGTAACTTAACTGAAGGATAGGTGCACAAAGAAACACAGAGGAGGGCCTGGAGGCTTCGTGGCAGTCACAGGTGTTGATCATGCGCACCGCATGACCCAAGATCATCAGCTCCACCACATGATTTCTTCAGGGCACCTCCATTTCCTGTCTCGTGCATTGTTAAATCAACAAAGGCCTCCGGCAACAGGGACTGAAACAGACCTGCGACCAT	5191:208:-
smaw_01_5482152	C01	5482152	8	+	G	C	CGCGTCAGATATCAGTGGGTGAGGGCATGGAGGAGGTGATTTATGGTATTGTGTTTCTTTCTCCGCGCAGCAAAGTGCAGCTAAANNNNNNNNNNNNNNNNNNNNNNNNNNNNNNNNNNNNNNNNNNNNNNNNNNNNNNNNNNNNNNNNNNNNNNNNNNNNNNNNNNNNNNNNNNNNNNNNNNNNNNNNNNGAGAACACAAAGTGCTCAAGGCAAGAAGGGGATGCTTCAGAGAGAATATTGTTGAGAGCACACAAAGTGCAAAGTCACAGGACATTTCCATCTGGTGCTGTATAGAAAATNNNNNNNNNNNNNNNNNNNNNNNNNNNNNNNNNNNNNNNNNNNNNNNNNNNNNNNNNNNNNNNNNNNNNNNNNNNNNNNNNNNNNNNNNNNNNNNNNN…	5192:8:+
smaw_01_5486821	C01	5486821	27	+	C	T	GAAAAATATCTGGCCAGAATATTTGGCCAGCAGTATTTTGGCATGTTAATTTCTCCCCATCCTTGTTAGACTCAGCTCTTTTAAANNNNNNNNNNNNNNNNNNNNNNNNNNNNNNNNNNNNNNNNNNNNNNNNNNNNNNNNNNNNNNNNNNNNNTCTTGTTTTCCTCATCTCCTCTTGTAACATCCAGTGGTCATAAGTTTGCGGTGTTTCGTCTGTGCATGTGTCGCAGGGCCCGCCTTTGTTTTCAGCGCCGG	5194:27:+
smaw_01_5487363	C01	5487363	254	+	C	T	TGCACAGACCCATGTGTCACTGCCACACCTGTTCCACGGCCTGGTGTTGACGGAGTGATATCACGCGGTAACTGTGTGCAAATTANNNNNNNNNNNNNNNNNNCTGGTGGCGGCGGCGGTGACCTGTAATTCAGGCAGGTAACTGTGTTTTAGACACACATGTATGGATGCATGTGCACAAACAGACGCATGCACATACACTCTCTCTCGGGGTTACAAGAATTCTATTTGCTGTGAAAACACACTGCACGCACGCACACTGGGGGAAGGGCCACATGCTGTGGCTGAACAACAGTTGGTTTGTAGAAAACGAAG	5196:254:+
smaw_01_5501517	C01	5501517	303	-	C	T	TGTGGGTTAAGAAGCAATGATTGTGAAAAGGAATGAGTGTAACACACTGGAGTAGGTAGATAACATTGTGTATGTGCATTTTGGCNNNNNNNNNNNNNNNNNNNNNNNNNNNNNNNNNNNNNNNNNNNNNNNNNNNNNNNNNNNNNNNNNNNNNNNNNNNNNNNNNNNNNNNNNNNNNNNNNNNNNNNNNNNNNNNNNNNNNNNNNNNNNNNNNNNNNNNNNNNNNNNNNTATATACGCATGCACACAGGGCGAGCTCGCACACAGGCACTTACAGTGGCCCGATCCACATCACCCTCTTGCGGGGTGAAGTCAA	5204:303:-
smaw_01_5521954	C01	5521954	35	+	T	C	TGCTGTTAGACTGCATTGCATTAATATGGATGTGTTACAGTTTACATTCAGGCTCTCTGCCTCCGTTGTAGATCTATTATTGGATNNNNNNNNNNNNNNNNNNNNNNNNNNNNNNNNNNNNNNNNNNNNNNNNNNNNNNNNNNNNNNNNNNNNNNNNNNNNNATGCTCTGAAGGTAAAATCATCCGACACCAAATAACACCAAGAAATCAGCTGATTGTTTTCACTGACATTTTAAATGGACCTGCCTTTCCCAGTTGACTCTAAATAACAGACCGAATAAGAAAGCGATATGGATCGACTGTGGGATCCACGCCAGA	5219:35:+
smaw_01_5530493	C01	5530493	197	-	C	G	AGCATGGGAGGATCCTGGGGTAGTAAAGGGGCAATTGGTGGGGGGTTGCACCTCTCCCTGTCCCTGCCCAGCCTTGGACCACCACNNNNNNNNNNNNNNNNNNNNNNNNNNNNNNNNNNNNNNNNNNNNNNNNNNNNNNNNNNNNNNNNNNNNNNNNNNTCTGACCAGTCACTGAAGTTGTCCATTTTGGTTGGCGGAGGCGGCTCTGCGTTGCCTCCAGTACCACGGTGATCAGGCCTCATGGAGGGAGGTGGGGTCCGGGGGCCTCTCTTCTTTTTATTATGTGGCTGAAGGGCTGAAGTGTCCTCGTCAGACACATCAGATTCTGCTCCTCGCGA	5229:197:-
smaw_01_5538981	C01	5538981	167	-	T	C	CGGCCGAGAGCAACTCGATTCGCCTGTCCGAGACCGACTGCCAATCCGCCGCTGTGGGTACCACCGAGGGCTGAGACACACACACNNNNNNNNNNNNNNNNNNNNNNNNNNNNNNNNNNNNNNNNNNNNNNGAGTGTAATTAGTCATGAGCTGTAATAGTCACCTCATCTGATGAGTTCGGAACAGCTTTTTCTTGGCTGGAAACAGGGATGGGTTTANNNNNNNNNNNNNNNNNNNNNNNNNNNNNNNNNNNNNNNNNNNNNNNNNNNNNNNNNNNNNNNNNNNNNNNNNNNNNNNNNNNNNNNNNNNNNNNNNNNNNNNNNNNNNNNNNNNNNNNNNNNNNNNNNNNNNNNNNNNNNNNNNNNNNNNNNNNNNNNNNNNNNNNNNNNNNNNNNNNNN…	5238:167:-
smaw_01_5539224	C01	5539224	69	+	C	T	AACAGCAGCCTCAGGAATTTGACCCACGTCTCAATCAGCAAGTTCGTCCTGGACCGCATCTTTGTCTGCGACAAGCACAAGATCCNNNNNNNNNNNNNNNNNNNNNNNNNNNNNNNNNNNNNNNNNNNNNNNNNNNNNNNNNNNNNNNNNNNNNNNNNNNNNNNNNNNNNNNNNNNNNNNNNNNNNNNNNNNNNNNNNNNNNNNNNNNNNNNNNNNNNNNNNNNNNNNNNNNNNNNNNNCGAGGGGTAGGGGGGCACATGCTGTGAGATTAAAGGCTGCACAGAAATGGATAAAGCATGACGGCACTGCTCTTAAGAATTAAAT	5239:69:+
smaw_01_5545218	C01	5545218	23	+	T	C	TCGTCTTGGTGCAGATTTGTGGTCCTGTTTTTAAAATCAGGACTTTTCCACTCCAGCGGATGGGAATCCCTCTCACTGGGGCCATNNNNNNNNNNNNNNNNNNNNNNNNNNNNNNNNNNNNNNNNNNNNNNNNNNNNNNNNNNNNNNNNNNNNNNNNNNNNNNNNNNNNNNNNNNNNNNNNNNNNNNNNNNNNNNNNNNNNNNNNNNNNNNNNTGATTGGTGGAGAGTACGGCCTTGGATTGGACAGTCATCCTTCCTGGTTCTAATGCTGTGATGGGCCTTGTTTTTGTGTTGTTAT	5243:23:+
smaw_01_5561298	C01	5561298	35	+	G	A	ACGAATCCAAACAGCAGCCAGGCGACAAGAGCAAGCTCCCCTCAGACCTTAGCAAACCCCCACAGGCCTCCACCCTGCCCCCCGANNNNNNNNNNNNNNNNNNNNNNNNNNNNNNNNTGCTCGACGGTGTTGTTTCTGTAGCGAGAGGCGCTCACGAGGCCTCCAGAGCCGCTCAGACGGTCCCCGCAGACGGCACTAGATCCCAGGCAGCAGTGCCGGAAAAGACTGACGATG	5270:35:+
smaw_01_5569424	C01	5569424	203	-	G	A	ACCACGTCCTTGGTGATGCGCCCGTAGGTGTTGACGTAGACGCCCTCGTCCTCGTAACACACCAGCAGCTCAATCCCGTCAGTGTNNNNNNNNNNNNNNNNNNNNNNNNNNNNNATGCTGGTCTGGATCTGAGGGGGACGGAAGAAGCGTTAAAGAGAGTAAAGAGCGAGATAAACAACGTGTGGTCAGACGACTCTCGGGGCGAGTACTCACGTGCGTGGGCAAGTAGATGTCGTAGACAGCACCGG	5275:203:-
smaw_01_5608252	C01	5608252	32	+	A	G	ACAGTTTTCAAAGGGTTTCGCAACTTCAAAAAATTTGCCAGGTCCCAGTGCACACTGACCAGCAATGTTTTACGGTATTGTGTCCNNNNNNNNNNNNNNNNNNNNNNNNNNNNNNNNNNNNNNNNNATGTTGCTCACCTTGGCAGCGTGGTTTTAGTAAGGCGCGTATCGTGGCGCATAATGATCCTTGGGTCGTGGAACAGAGTAGCTGCCCCTGGAAGACACCGGTGACAGCTGTGTTCGCTCATAGGTGTAGCCTCCCGAAGAGACCGGCACTCGTCTGATCTCGTCTTGTGCATAGTATGCGC	5295:32:+
smaw_01_5610638	C01	5610638	29	+	T	G	TATGTCAATTGTTGTTGTTGTTGTTGTTTTTTTGCCTTTGGATCGGCGCGTCACGCGTTGACTCGTGACACGAGCGTCACATACGNNNNNNNNNNNNNNNNNNNNNNNNNNNNNNNNNNNNNNNNNNNNNNNNNNNNNNNNNNNNNNNNNNNNNNNNNNNNNNNNNNNNNNNNNNNNNNNNNNNNNNNNTCGTGCTAGCGAGCTAGCTAGCGAGCTAGCTTGCTAACGCCGTTAGTGTTGTTGCGGCGCACATCGCACAGAGAGGCCAACTGGTTTCGCCCAGCAGCCAGGACGTGCTCACTCCGTCTACGATCATGTGGAAAGTGTTCAGCGCGTTCACCATTCACTGTAACGCCGTTCCAATGA	5297:29:+
smaw_01_5619663	C01	5619663	5	+	C	T	GCTGCCTGATGTCCTGTGTGGCAGAGCACCTGGCCAAGACTTATTTTGGAGAAAAAACATAGGTGTCGATAAGCTGACATGTTTGNNNNNNNNNNNNNNNNNNNNNNNNNNNNNNNNNNNNNNNNNNNNNNNNNNNNNNNGCAGCGCGTACCTGTAGTGGAGGGGGAGTCGACGGCGACGGCGGTGTCAGGGCCCAGTGTGCAGCTCGGTCTCGCCGTCGGGTCGCCGTCCTCTGTGCCGGGAGTTA	5301:5:+
smaw_01_5648671	C01	5648671	296	-	C	A	TGAGGAGAACATCTGGCTTGTGACGGACATTGGACACCATGGGTTTGCACTCAGCCCAGAAGAAGCACTTCCCTCTGCGGGGCATNNNNNNNNNNNNNNNNNNNNNNNNNNNNNNNNNNNNNNAGTCTGAGCCTGACCTAGCCCTTCTTTCCCTGGTCCTGGGCTTCGTCGAGCACTTCCTGGCTGTGAACCGAGTCATCCCCATAAANNNNNNNNGGGTGCGGTTTGAACCGCTGGAGCCAGACTGTCCCAACTCCTGCTTCCCTACTGTAGAGCTGGGTATGATCAATGCACTGTACGAGCGCTTCACGGCCCAGATCCGCGGTGCAGTGGA	5331:296:-
smaw_01_5672472	C01	5672472	106	+	T	G	GAAGGATCTGATCCACTGGCGAGACCCCAAGAAGTCGGGCTTGGTGTTCGGACTCTCCATGCTGCTGCTGCTGTCGCTGGCAGCCNNNAGCGTCATCAGCGTGGCTTCCTACCTGCTGCTGGCCCTGCTCTGCGTCACCATCACATTCCGCATCTACAAGTCCGTGGTCCAGGCTGTGCAGAAGTCCGNNNNNNNNNNNNNNNNNNNNNNNNNNNNNNNNNNNNNNNNNNNNNNNNNNNNNNNNNNNNNNNNNNNNNNNNNNNNNNNNNNNNNNNNNNNNNNNNNNNNNNNATGGAAATACTTTTTTATCCACTAATACAGCTGCTTTTGCTTCTTTAAATTGCTGTTAATCTATCGTTCCTGCATCCATTTCAAT	5343:106:+
smaw_01_5683841	C01	5683841	77	-	C	A	TTTAAGACACAACAGTATGACGGAGAAGCTTGTAATATGTGAGGTTTTGGCTGAGGAAACGGACAAAAAGTTTGATGAATGACAGNNNNNNNNNNNNNNNNNNNNNNNNNNNNNNNNNNNNNNNNNNNNNNNNNNNNNNNNNNNNNNNNNNNNNNNNNNNNNNNNNACGCCTACCCCGATGTCAGGACCCCTAGTCAAATGATAAAGAAGGAGGAGGGTGTGAGCGGGCGGAAGGGTAAAGCGAGGGACAGCAGCACCGCGGCCACGCCTGCCCGTC	5347:77:-
smaw_01_5685908	C01	5685908	75	+	G	T	ATGCAGTGCTTCTCCTCAGAGCTGTACACCAAGGAGTTAGGGTGGGTGTCCAGCACGTGGCTCTTGATGTGGTCGAGGTGAAGCGNNNNNNNNNNNNNNNNNNNNNNNNNNNNNNNNNNCCGGCCGGCCTCCGCCTCGTACTCCATCAGAAACTCCTGGCGGAACCAGGCGTGCAGCGAGTCGTTCAGGTAGCGCTCCAGGGTC	5349:75:+
smaw_01_5695022	C01	5695022	277	-	G	A	GTCAGGTCAGCGGCCAGAGGAGCCGCTTCATCCTTTTCAAAAAAGAGCTGAGGTAAATCTGGCTTCATCTCTGGCTCCGACGCCCNNNNNNNNNNNNNNNNNNNNNNNNNNNNNNNNNNNNNNNNNNNNNNNNNNNNNNNNNNNNNNNNNNNNNNNNNNNNNNNNNNNNNNNNNNNNNNNNNNNNNNNNNNNGTAGCCTGGCTGTCTGCACTCAGAGCTGGATCAGACTCTGGCTGGGGTGCTGGAGGTGGGGATTTTGGGTGTTTGATATCTGGACAGATGGCTTGTTCCG	5355:277:-
smaw_01_5699145	C01	5699145	73	-	C	A	TCCCCGCACACCATGCACACCAGCAGCTGGTTGAGCGGATCGTAGTCCATGAGGTAGCGGCTCCTCCACACGGTGTCGGATATAGNNNNNNNNNNNNNNNNNNNNNNNNNNNNNNNNNNNNNNNNNNNNNNNNNNNNNNNNNNNNNNNNNNNNNNNNNNNNNNNNNNNNCTAACGTTGCCCAAATGTTCATTCTCGTCGGTTCAAAGTGAAAGAGTTAATACTCCACCTTCTATTGGCGCTGTGTAATTTGAGT	5361:73:-
smaw_01_5703407	C01	5703407	74	-	A	C	TACAACTGGATTTGGACCGTGACTTTGGAGACGAAGAGACCTTTGACATAGACGACTGTAAGATATTTACATCTTTCCTTGTGGTNNNNNNNNNNNNNNNNNNNNNNNNNNNNNNNNNNNNNNNNNNNNNNNNNNNNNNNNNNNNNNNNNNNNNNNNNNNNNNNNNNNNNNNNNNNNNNNNNNNNNNNNNNNNNNNNNNNNNNNNAGTCAGGGACACCAGGCCACCCTGAACCAGTGGATCTCTGGCCTCCAGCAGAACAACCCCATCCTGGGTCGGGTCCCCACTCTTTTTCGTCTGAACGCCGGTCCCAGG	5362:74:-
smaw_01_5709174	C01	5709174	258	-	A	C	AGGATGTGAGCGCGGCACATCCGAACACGGACCGTCCACGAAGCTGCCGCGCTCAGTAAAAAAAAAGAAAAGAAAAGAAAAGTCANNNNNNNNNNNNNNNNNNNNNNNNNNNNNNNNNNNNNNNNNNNNNNNNNNNNNNNNNNNNTTGCTGGAGGAATTCATAATCCGAGGGTTTTCAACCGTAGGAAGTTTCCTTAGATGTGAAGTGTGTTTTCCATGCTGGGAGAGGAGTGTCAGAAGTCACGCACTGGGACGTGTGTCAAGCCGCCAGCTCTGA	5366:258:-
smaw_01_5710411	C01	5710411	38	+	A	C	TATGAGATGCGGATGCGCCGTTACTCCGCAGCCCCCTATGCACGTGTCTCGCTGTCCAATGACTGTAGTGCACAAGCTATGGTGANNNNNNNNTGTGCAAAGGCAGGGGGCAAAAGGTCAAGCTCTAAAGGAGTGCATGCATTAAGATAAAATAAGATAAGTTGAGATAAAATAAGACTTT	5370:38:+
smaw_01_5715582	C01	5715582	75	+	G	T	TGCAGCCAGCCGACTGGAGGCGATCAGGATGATTGGGCTTCACTTCTGGGAGCTGTCATGTCGTGCATCTTTAGGTACAGTCTATNNNNNNNNNNTATTTGTCTGGAAATGGATTTTGTTTTCTGAGCTCCTTGGTCCAGGTCTGATGCCTTCCAACATCAACTTCAACTTCAAGAACTGACTGTTCACGTGTCGCCTAATGGCTCCCACAGGCGACATTGTAATAAGACGAACCACGTTATTCACTTCATCCGTCAGTGGTCTTAACCAAAGACTATTAAAAAA	5375:75:+
smaw_01_5722817	C01	5722817	39	+	T	C	GCAAAAGCAACAACACTTGAGATGGCTGAATGAGAAATTCAGCGGTTGAGTAATCATGAGAACTACCCGACACAGCTGAAGGGAGNNNNNNNNNNNNNNNNNNNNNNNNNNNNNNNNNNNNNNNNNNNNNNNNNNNNNNNNNNNNNNNNTGACACCAGAACAGAGGCAGACATTCCACACAAATGTATTCACACAGCAGCTTTGTCCCTACACATGCACACACACACACACCCACACACACNNNNNNNNNNNNNTTTGAAAAACACTCTTTGGTGTGGTGTTGCAACTCTGAGGTTTTGGCCTGGTGGTTAGTTCACCAGTCTCCCATACCCGAGGTCC	5379:39:+
smaw_01_5757740	C01	5757740	269	-	T	C	CCAAGAGGAGGAGGGGGGTGTAATGAGTGAATGTGATCAGGCTTCAGTAGGCCGCATGACATTAGCAGCAGCACACTACCTCCACNNNNNNNNNNNNNNNNNNNNNNNNNNNNNNNNNNNNNNNNNNNNNNNNNNNNNNNNNNNNNNNNNNNNNNNNNNNNNNNNNNNNNNNNNNNNNNNNNNNNNNNNNNNNNNNNNNNNNATAAGAATTTTGTAATTTTTAAAAAAAGTATGATTATTATTGTCATTTTCAACTCTGGTAGTGTCAACTCACTTTTACTACTTCAC	5401:269:-
smaw_01_5791982	C01	5791982	232	-	T	C	ACTGAGGGACACACAAGGTTCCATCTGGCCATGGTGACTAGTCAGAAATTCATTGGGAGAGTTGGGTGATGCAGGTGGGGGGGGGNNNNNNNNNNNNNNNNNNNNNNNNNNNNNNNNNNNNNNNNNNNNNNNNNNNNNNNNNNNNNNTCTGACGTCGACTGTCCCGTGCGGACATCGTCATTCGTTCCCACAAGACTCCCCGAACCCACTCGGGCTCCATGTTAACAACACA	5426:232:-
smaw_01_5819127	C01	5819127	169	-	C	G	CCCGTTTGTCTCAAGGATTATACCCTCCTCCTGGAGCCTCTGGGTGCAGTAGCGAGCAGTTGCCTCTGGGTCCTCTTGCCTGTCCNNNNNNNNNNNNNNNNNNNNNNNNGACTCGCTGCTGTCCTTCTCTATATGGAGCACACTGAGTTCCTGACCCATAAAATGGGTGCGTATCTGGTTTAGGTAGGTCATGA	5432:169:-
smaw_01_5823630	C01	5823630	219	+	G	T	CGCGAAACCGATCAGAGAGAAAGTGGGTCAAGACAAAACCAAGAACGGGACAGATGTGTGTTTGGTCGTCTTTCACCTGCTGTCANNNNNNNNNNNNNNNNNNNNNNNNNNNNNNNNNNNNNNNNNNNNNNNNNNNNNNNNNNNNNNNNNNNNNNNNNNNNNNNNNNNNNNNNNNNNNNNNNNNNNCCAACGGAATACGCACATGGCCCGAAACCAGAGTGAGGCTCTGAGAAGCTCTGAATCAACTCCACTGTTATTTTCTGAGCGTCTT	5436:219:+
smaw_01_5871704	C01	5871704	280	+	A	G	ATCTATATGCAGCCCTGTTCTATCACACATCATTCACACACTGACAGCGCGGTCGTCAGGGGCAATTTAGGCTTCAGGGTCTTGCNNNNNNNNNNNNNNNNNNNNNNNNNNNNNNNNNNNNNNNNNNNNNNNNNNNNNNNNNNNNNNNNNNNNNNNNNNNNNNNNNNNNNNNNNNNNNNNNNNNNNNNNNNNNNNNNNNNNNNNNNNNNTTGGGCCTTTTGTGCAGATATGTCCGTATTGAATGGTTGCATCACAGATTGTAAATCAGTTCACTGAATGACCTTAACTAGGAGA	5465:280:+
smaw_01_5875296	C01	5875296	193	-	C	G	GCAGAGGGGAGGCCAGGAGAGGAGGACAAAAGAGGGAAAGGAGGGAGGGACAGATTTAGGAGAGGAAGAGAAGAGCAGGAGGAGGNNNNNNNNNNNNNNNNNNNNNNNNNNNNNNNNNNNNNNNNNNNNNNNNNNNNNNNNNNNNNNNNNNNNNNNNNNNNNNNNAGGACGAGGATTAAAATGGGAGGATGCGAGCGAGAGGTGACAGGTCAAGAGGAGGCTAGGAGAACAACCACGGGGACCTGGAGGTT	5470:193:-
smaw_01_5893011	C01	5893011	250	+	G	C	CGTATCTCACCCCTTCTCCTCGGTCTGTTTTCTCGCTCGCTCACTCGATTTCTCCTTCAGCACAAGGGGCCACGGGAGGGACGTCNNNNNNNNNNNNNNNNNNNNNNACCCTCATGCTGTGCCTGAACTCCCTTGGTTCCACGAGCCTTTCCATGTTCCTTACTTTTAATGAACGGAACATTAATCTTCCTGNNNNNNNNNNNNNNNNNNGACAGAACCACAGTGTTTGATTACCTCACATAGTCTGTTGTTGTTAGTATCTTCGGCGGTGGTAAGGTTGATCCTACTGACCTGACGCAGAAAAGGGACGCACACCAGT	5483:250:+
smaw_01_5894972	C01	5894972	205	-	A	C	TACACGAGTGCCCTCTACTGGCCCAGGACTACAATAGCATCTAAACAGACACTTCATGACATCTAGTAAATTAATTTATCCAATANNNNNNNNNNNNNNNNNNNNNNNNNNNNNNNNNNNNNNNNNNNNNNNNNNNNNNNNNNNNNNNNNNNNNNNNNNNNNNNNNNNNNNNNNNNNNNGGCCTCTGCCACTGTACAACCTCACTACTTAAAAAAGAACAATGTCTCATTTTTGTGTCCTTGACAGGTCCTTATTTCACAAAGTC	5485:205:-
smaw_01_5949791	C01	5949791	100	-	T	C	ACATGTCACTCAATCTCATGCAAAAGGTCAAACTCCTTAAGTCTCCAGCGTTCCAAAAAGCGTAGTGTTTATTTCTCTACGTGTGCGTGGGGATTTGGAATTGGTTGGACCTTTGGTGGATCTTTTCCCCCACAGTCTTTGCACAGAACACTCGAAGCTCATAGTCCACG	5523:100:-
smaw_01_6049359	C01	6049359	48	+	T	C	AATTATGCAAATATCATCAATAAGTCATCACGGTGATGTTCTCTCTGTGTTCTCCAGGTCAATGGGACAGTGGTTGTCCCACCTGNNNNNNNNNNNNNNNNNNNNNNNNNNNNNNNNNNNNNNNNNNNNNNNNNNNNNNNNNNNNNNNNNNNNNNNNNNNNNNNNNNNNNNNNNNNNNNNNNNNNNNNNNNNNNNNNNNNNNNNNNNNNNNNNNNNNNNNNNNNNNNNNNNNNNNNNNNNNNNNNNNNNNNNNNNNNNNNNNNNNNNNNNAACTGAGTCTAGTCAAAACCTCCAATCTATTTCCCTGTGTGTAGCAGCTCTCCAAGCCAAAACACCTAGGTCCAACCAAAATTCGG	5587:48:+
smaw_01_6053852	C01	6053852	233	-	G	A	TCAACCACACTTTCGTCGGGCAGGTAGACTTTGACAGAGCGAACATAAGAGGCCTCTGGCTGGCCACGCTCCTCATTTTTAGCCANNNNNNNNNNNNNNNNNNNNNNNNNNNNNNNNNNNNNNNNNNNNNNNNNNNNNNNNNNNNNNNNNNNNNNNNNNNNNNNNNNNNNNNNNNNNNNNNNNNNNNNNNNNNNNNNNNNNNNNNNNNNNNNNNNNNNCTGAAGCACAAATTCGTCTCCTACCTCCACTAATGTATAAGTGCAGGTGCCCATGAATGTGTGCATCACGCCGTCGAAGGTGTAG	5589:233:-
smaw_01_6064909	C01	6064909	4	+	G	A	ACCGTAGTGCTGGCCGTTCACCCGACGAGGCAGCCGCTGCTGTCACATCAAATGTCCCCCGACGAAAACGCTTTATTAACACGAGNNNNNNNNNNNNNNNNNNNNNNNNNNNNNNNNNNNNNNNNNNNNNNNNNNNNNNNNNNNNNNNNNNNNNNNNNNNGGAAGCGTCCTGAGATGTGCTGTAAGCGTCCACACATATTTCATTACTGCTGTTTGTGAGACATGAAACACATTTCCCATCAGGAAAATACAGTTCCGCGAAAAAGG	5606:4:+
smaw_01_6080305	C01	6080305	250	+	T	G	TTCAGTTTCATGTGCTGACTCAACTGTGGCGTTATCACGGGCAGGACAAGAGTGGACAAGATGGAGCAGCATCAGCGTATGTAGANNNNNNNNNNNNNNNNNNNNNNNNNNNNNNNNNNNNNNNNNNNNNNNNNNNNNNNNNNNNNNNNNNNNNNNNNNNNNNNNNNNNNNNNNNNNNNNNNNNNNNNNNNNNNNNNNNNNNNNNNNNNNNNNNNNNNNNNNNNNNNNNNNNNNNNNNNNNNNNNNNNTTCTGTACCTCAAAGAGTCCCGTCCCGAGGATCTGGAAGGCCACGGCGAAGGAGATGGTGGAGCCCTTCCTGCACTGTCCCAGGTGGTTGAGGGGAGACCGGCACAC	5616:250:+
smaw_01_6087183	C01	6087183	189	-	C	A	TGAAACTATGTCGAGGGCTGCCTGTTTTGATGGCACACCGAGATGTGCAGGATTTCTCCTGGTGTGAGGGGAAAAAAAGTGATGGNNNNNNNNNNNNNNNNNNNNNNNNNNNNNNNNNNNNNNNNNNNNNNNNNNNNNNNNNNNNNNNNNNNNNNNNNNNNNAGACATCGTATGTGTTATTATGAGGTGTGTACAAAAATGTTGGTTCCGAATCAGCTTTATTGGCCAAAGCATGCGTAAACATATG	5618:189:-
smaw_01_6097707	C01	6097707	9	+	A	G	CTGTGAGAAAGGAAGGAATCATGGTGCATTATTGATTTCACATGCTTTCTGTTGACCTTAATGGAAGAGACCTTTCTGGGCCCAGNNNNNNNNNNNNNNNNNNNNNNNNNNNNNNNNNNNNNNNNNNNNNNNNNNNNNNNNNNNNNNNNNNNNNNNNNNNNNNNNNNNNNNNNNNNNNNNNNNNNNNNNNNNNNNNNCAGCACTATGATGATGTATTATGTAACCGAGGCAAATTTGTCTGCTAGTTGACCCTCAGATAATTGTGAAACAAATATAAAGTTT	5626:9:+
smaw_01_6140851	C01	6140851	11	+	C	T	TCATCAACGCCGCGCAATCACTGCACTTTGTCTCGTTGTGGCTGTGAGTGCAGTCCGACAGCAGCAACGAAGCAGTCTCCATCTTNNNNNNNNNNNNNNNNNNNNNNNNNNNNNNNNNNNNNNNNNNNNNNNNNNNNNNNNNNNNNNNNNNNNNNNNNNNNNNNNNNNNNNNNNNNNNNNNNNNNNNNNNNNNNNNNNNNNNNNNNNNNNNNNNNNNNNTGTGTTTAGCTTTTTACCCATTCTTTACCCATTCTTTACACTGTTAGGTAGAAATCCACACACAGTGTCATTTTTTAACACGTCTTCTAAGAGTGTAACGCCTC	5657:11:+
smaw_01_6151915	C01	6151915	236	-	A	C	TCGCCGTCGTAACCGACTTGAGTGGGCAAATGCTCACATTCGCTGGGGTTATGGTATGGGCAGGCGTATGTTATGGACAACGAACNNNNNNNNNNNNNNNNNNNNNNNNNNNNNNNNNNNNNNNNNNNNNNNNNNNGATCCCGAGGCCCATTGTTGTGCCATTCATCCACGACCATCACCTCATGTTGCAGCATGATAATGCACGGCCCCATGTTGCAAGGATCTGTACACAATTTCCTGGAAGCTGAAAACATCCCAGTTCTTGCATGG	5665:236:-
smaw_01_6177898	C01	6177898	162	-	T	G	CTGTCAGGGGTGCCTATGGCATCAGAACAGGGAAAAACACCACCAGGTGACAGAGCAGATTGTATACAGACAGAGTGACAGGGGCNNNNNNNNNNNNNNNNNNNNNNNNNNNNNNNNNNNAATGTTGGGATTATGGGAGCGGAGCCAAGGGTAACCAAGGAACTAAGGGGTGGATGGAGCTGATATTACCTTGAATTGAATCTCC	5681:162:-
smaw_01_6195111	C01	6195111	15	+	G	C	CCACCTCAACCGCGGTACCCACTATGGGGAACAGCAGCAGTGACTCCTTGAGGGCTGAAAGAGAGCAGAGCGAGGATGGCACACANNNNNNNNNNNNNNNNNNNNNNNNNNNNNNNNNNNNNNNNNNNAAAAAGGAAATAAAAATTGAGGGGGGTTATGAGTGTGGGGACTGCGGCCGCCATTTTAACTATCTCGGGAACCTGCGACAGCACCAGCGCATCCATACCGGGGAGAAGCCCTTCATGTGTCCAGAGTGTGGGGAGAGATT	5685:15:+
smaw_01_6209616	C01	6209616	223	-	C	T	GAGCCTTCAGAGATATTGTTTGAACAGGTTCGTGGTGGACATCAGGTGGAAAGCACTGTCAGCAATCAAGCTAGGAAGTACAGAGNNNNNNNNNNNNNNNNNNNNNNNNNNNNNNNNNNNNNNNNNNNNNNNNNNNNNNNNNNNNNNNNNNNNNNNNNNNNNNNNNNNNNNNNNNNNNNNNNNCAGCAGTAAACCGTGCAAATACAGTTAGTATGATCAGACGCATGACTGTCTGTCACAGGCCTATGCCCAAGCAAATCAGGCATGTTGNNNNNNNNNNNNNNNNNNNNAGAAATACTATGAACAAAAGGTGAAGAATCCATTCTTTGGTCCAACGGACATGCGGTGGACAAGCTCTCACACAGGCGAGGGAGT	5691:223:-
smaw_01_6219234	C01	6219234	8	+	C	T	GGGCAAGCGCCGAGGCACAGACACACAAGCACTCAGGATTGGGGAAGATTTATCATAGACGAATGCCTTCATTTCTTCAATGCCGNNNNNNNNNNNNNNNNNNNNNNNNNNNNNNNNNNNNNNNNNNNNNNNNNNNNNNNNNNNNNNNNNATGCAGTTTTCTGTAACATGAGCAACCTCGCTGCGATCTGTACTATTCCTCAGATCAAGTTATGATCGTCCACGGTTTAAAATCGTCAGATCGCACACCCCTACTCAGAACCGCTCNNNNNNNNNNNNNNNGAAGTCGGGGTGGTGATTTTTTTCCGACCGCCCAAGTCGCAGTGGAACCAGAACGCAGCACAACAAGGCATAGCAAACATGGCGA	5693:8:+
smaw_01_6286936	C01	6286936	250	-	C	T	GAATGGACACTGTAGGTACGCCGTTGGTTGTGCGCCTACGCTGTAGCTGCACCTCCCTAGAAAAATTTAACTACACATCGTGGCANNNNNNNNNNNNNNNNNNNNNNNNNNNNNNNNNNNNNNNNNNNNNNNNNNNNNNNNNNNNNNNNNNNNNNNNNNNNNNNNNNNNNNNNNNNNNNNNNNNNNNNNNNNNNNNNNNNNNAGGGTTATTTAACTGATTTAAAAACCGACAATGATGACCAGGTATTAGAGTCCCAAAGATTAACAGGATCAAGAGAACACTGACTGCTGTCACTGAGCCGGCAAC	5718:250:-
smaw_01_6296463	C01	6296463	35	-	G	A	GTCAAGCTCTTGGGGCAAGTCAAGGTCAATAACCCCAACCCTTCGACACCACATTGAAGCAAGAACAGGACTCATTTTCTCAACCNNNNNNNNNNNNNNNNNNNNNNNNNNNNNNNNNNNNNNNNNNNNNNCCCCTTCTTCCTCTTACCAGTTTTCCTCTCTGCTGGGCTGAGCGGGTCTCCCTCAGGGCAAACACGTTGCCACATACGGAGATCTCCCTCCAGACGCCCGGAGCCGGCTCGGACA	5731:35:-
smaw_01_6367497	C01	6367497	72	-	A	G	TTTGGCCACCAGGCAAAGATTGTCCACTTCCTAGGACCGAAGAAACCCTGGCTCTCCCGCAGCCAGAGGGATGACGGCGGCTCACNGACCATGGATCGGTTTGTGGCCCTGTGGTGGAAGGAATACCTCAGTCACACAACAGCGTCTGCATCAGCGGAGGAGCCAACTCGAGACTGTGAGGAACCACGACAGGTCTATGGATCG	5764:72:-
smaw_01_6376390	C01	6376390	135	-	A	T	AATTTCACTTTACGAAGGAACTGATTCAAGTATTTCAGCAGAGCCACCGTGTCACAGCTTAGCCCTCAGGTTTGCAGGGGCCCCANNNNNNNNNNNNNNNNNNNCACACAAGACACCAGTCTCAGTGTGAACCTAAATAACAATGAACAATATCGCCACGTCCTTTTCCCTTCCCGTCCCGTTATGTGA	5770:135:-
smaw_01_6388092	C01	6388092	247	+	G	T	TCTCCAGTATTGTATCGGATCATGACTCAACACCCTCTGACAACCTGCTCTGTGTGGATCTGGGCTGTGTGTGCCTGGGTCAAAANNNNNNNNNNNNNNNNNNNNNNNNNNNNNNNNNNNNNNNNNNNNNNNNNNNNNNNNNNNNNNNNNNNNNNNNNNNNNNNNNNNNNNNNNNNNNNNNNNNNNNNNNNNNNNNNNNNNNNNNNNNNNNNNNNNNNNCTTGTCAGGTTCGGGCTTGGTGTCTGTGGGCACAAAGAGGATCATAGTTGTGAACAGAATCATTTTCTACGGATAACAAACCAAA	5781:247:+
smaw_01_6416342	C01	6416342	209	-	G	A	GGGCCAGTGTTACAGGCTTCAACTGTCACATCTCATGTTGGGTGTGCAGACTGCTTTTAAAGTGTGTGGTTTCATTGCCTTGGCTNNNNNNNNNNNNNNNNNNNNNNNNNNNNNNNNNNNNNNNNNGAGAGAGAGAGAGAGAGAGAGAGAGAGAGAGAGAGAGAGAGAGAGGTGGAGACAGCGTGATCATTACCTCTTCCCTCATGGCCTTC	5796:209:-
smaw_01_6420400	C01	6420400	204	-	T	A	GTAGACGGTCACGGATGCACCCTCGGCTGGAGTCTGAGGAGGACGAACATGATGGCAATGAAACAAGGAGAAACCAGAGTGTGGANNNNNNNNNNNNNNNNNNNNNNNNNNNNNNNNNNNNNNNNNNNNNNNNNNNNNNNNNNNNNNNNNNNNNNNNNNNNNNNNNNNNNNNNNNNNNNNNNNNNNNNACCCCCTCTTACTGAAGGACGTCTAGAACACTGTCACTGATCATTAGAACTTACCTACCTAGATAAATAGATAGATAAATACTTT	5799:204:-
smaw_01_6435459	C01	6435459	57	+	T	C	AAACGAGACACTGTCCATGTCGTTAGTGGCTGTCAGTGGTCAGGGGATGAACACACTCGCTCCTGAACTCGGTTTGAAATAATAGNNNNNNNNNNNNNNNNNNNNNNNNNNNNNNNNNNNNNNNNNNNNNNNNNNNNNNNNNNNNNNNNNNNNNNNNNNNNNNNNNNNNNNNNNNNNNNNNNNNNNNNNNNNNNNNNNNNNNNAAGCTCGGGTATTTTAAATAAAAACACACAACTACTCGAAGTCCTCAACAGGAAGCTCGGTTAGCTTCTGGCTAACCAGGCAAGTGT	5814:57:+
smaw_01_6481428	C01	6481428	30	+	T	G	GGGAACAAATCACTCTGCTCAGAGAAAAGTCCTAATTCTGCGCTCTCATACATTTGGAGGTGGAGTGATCCTGTGCACATTGGTGNNNNNNNNNNNNNNNNNNNNNNNNNNNNNNNNNNNNNNNNNNNNNNNNNNNNNNNNNNNNNNNNNNNNNNNNNNNNNNNNNNNNNNNNNNNNNNNNNNNNNNNNNNNNNNNNNNNNNNNNNNTTTGTCAACATCTGCATGGCTTTTCCAGTGGTGGAGACTGCTCCGTCAGACTGAAAGGAAATTCAGCCCCAAACCCCAAATGTCG	5835:30:+
smaw_01_6498179	C01	6498179	6	+	A	C	GGCAAAGGTCCGAGGCCGTGACTTTGGTCAAGGAGTTCATGGAAGTCGCAGACGTTCTCCAGAGTAAAGTCCTGGAGCTGAGCCANNNNNNNNNNNNNNNNNNNNNNNNNNGTGAGTCGCGACTCAAACACCAACGGGAGGAGGAGGAAGAGCGCCAGAGGTTTGATCAGATGCACATCGCGTCTCTCACGGAGGANNNNNNNNNNNNNNNNNNNNNNNNNNNNNNNNNNNNNNNNNNNNNNNNNNNNNNNNNNNNNNNNNNNNNNNNNNNNNNNNNNNNNNNNNNNNNNNNNNNNNNNNNNNNNNNNNNNNNNNNNNNNNNNNNNNNNNNNNNNNNNNNNNNNNNCTACGAATGGATCGAGTCCAGTGAGAGTGACAAATGATTGACCTTGTCCTGTG…	5850:6:+
smaw_01_6524229	C01	6524229	71	-	G	C	CTGTCCTCACTGTGGTGGTGGTGGACTCAGCAGGCCTGGGCCTCAACGTCTTCACTCAGGTGAGGAAGTACAACAAGCCCCCTCCNNNNNNNNNNNNNNNNNNNNNNNNNNNNNNNNNNNNNNNNNNNNNNNNNNNNNNNNNNTCCTTCCCTCAGTTCCTCATCTATGGCGGCTACTTTGCAACCATTTCCGCCATCTTCCTAATCGCAGGGTTCTTCAGACTGGCCTCAAGGCGGTGCTGCGAGCAGGAGGT	5867:71:-
smaw_01_6525965	C01	6525965	217	-	A	G	GCTACAGATGTCGCCCTCTGCTGGCCTGGTCACTGTGGTGGGCTCTGGCCACATGTGGCTACTTCCAGGTGGTCAACTACGCTCANNNNNNNNNNNNNNNNNNNNNNNNNNNNNNNNNNNNNNNNNNNNNNNNNNGCTACGTGGAGACACTGTCCACACTGTTAGGTGAGGCTGCTGCTGGTTGCCGCTTTATCACATTAACCCCAGATACAACCCTGTTCC	5869:217:-
smaw_01_6543626	C01	6543626	270	-	G	A	AACAGAAACAGGTGACGCCCTCGGTCCTCCCACCAACTCTTCACTGTACACACCCTAACCACACGCTCACCACGAGGAGACCCTGNNNNNNNNNNNNNNNNNNNNNNNNNNNNNNNNNNNNNNNNNNNNNNNNNNNNNNNNNNNNNNNNNNNNNNNNNNNNNNNNNNNNNNNAGTACTTAAAACTCAAAGCCTCCTTCACCATAGAGGACCAGGGAGAGGAGGAGCAGCTCACCGAGGACCAGTCACGCAACCTGCTGCAAGAATTCATCCAGCACATCGAGGTGAGACCGACGGA	5889:270:-
smaw_01_6567457	C01	6567457	70	+	G	A	CCTTTCGCACACCCCACGGTCAGAGAAATCTGAAGTGTCCTTCAGCCTCAATGAGATGGAGACCTACCTGCCTTACACCAAAGCCNNNNNNNNNNNNNNNNNNNNNNNNNNNNNNNNNNNNNNNNNNNNNNNNNNNNNNNNNNNNNNNNNNNNNNNNNNNNNNNNNNNNNNNNNNNNNNNNNNNNNNNNNNNNNNNNNNNNNNNNNNNNNNNNNNNNNNNNCCATCAAGCTTATACTGCCTATAAGTGGCGCTTTCCCAGCCCAAACCCCAGCTAACCCTACCCTCCTGCCTCCAGAGGAGCCCACAGAATACAAGAACCGGGGCGACCTGGAGAGCGACGTGGGCGTCAGGAAGGCCTGTCGCTTCTCCAGGAGCCTGC	5912:70:+
smaw_01_6571969	C01	6571969	118	-	G	A	GAGGCCCACAGAACAGTGTGGTGACCCTTGGCCCCCAACCATCTGAGCTAACCGACCATTAGTCAAGACAAACCATGAAACCAGGNNNNNNNNNNNNNNNNNNNNNNAGGGCTATGCCGTCTGGTCTAGTCTGACAGAGGAGCTACTGTGGCCCAAGTTGCAGTTGACTCGCATGAATGAGAGGAATGTGTCACTGCATCAC	5914:118:-
smaw_01_6573069	C01	6573069	63	+	C	T	ATGTTGTGCTCAACACAGCTGTTTTGATTGGCTGAGCGGATAATTGCATGAACAAGCTGGTGCGCAGGTGTTCCTGATGAAGTGCNNNNNNNNNNNNNNNNNNNNNNNNNNNNNNNNNNNNNNCTGAACACAAGAGGGCAGCGGTGCAACACTCGGTTCTTCCTCTCACGCCCTGTTTTTCAACCGCTCCTTTATCTTTTCGAGTCCGCGTGCATTTTCATCGCCTCCATTTGTCATCGGGACGATTTATTTATGTCACCTCTGGCCCACACAGTTCACGTCAAACGTGATGCACAGGCCAG	5917:63:+
smaw_01_6587618	C01	6587618	30	+	A	C	CTGGTAATAACTGTTAGAGTGAGTTAGTAAGTACATCCCACTACTGCTGTAGAATAAATACGCTTTTTTAACTTCTTCTCAAAGANNNNNNNNNNNNNNNNNNNNNNNNNNNNNNNNNNNNNNNNNNNNNNNNNNNNNNNNNNNNNNNNNNNNNNNNNNNNNNNNNNNNNNNNNNNNNNNNNNNNNNNNNNNNNNNNNNNNNNNNNNNNNNNNNNNTGGGAAATCTGGAAAGTGATCATCATGTCCTCCTCCACGCTGCCCTCATACTCCAGCAGCTCCGTCAGACTCTGGTGCAGAACCTACCCAGCACAGTCCGGCACAGTCATATATCATCATATCAAGTGACAAACATGGCTGCTCAAAAACATGAACTTCCAGCACTAAAGTCTGGCAGCGTTA…	5927:30:+
smaw_01_6588165	C01	6588165	43	-	A	G	CATGTTCACGTACGACGAGCGCACCAAATTGTTTTGGTTCAATGCGTCGTCTCTCGAAAACGAGGGCCAGTACACGCTGATCGGCNNNNNNNNNNNNNNNNNNNNCTATAACAACTGTATCCTGGATGTGCACTTTCCCATGGTGGTCTACAGGAAACTGATGGGCAAGAAAGGAACCTTCAGGGACCTGNNNNNNNNNNNNNNNGTAAGAACTACCTCTTAACGCTGCCAGACTTTAGTGCTGGAAGTTCATGTTTTTGAGCAGCCATGTTTGTCACTTGATATGATGA	5928:43:-
smaw_01_6601290	C01	6601290	56	-	T	G	CTCCGCCCACCACGCCCACAGCTAAGAACAAATAGTCCGTCTTGAGGAAGTCAGCAGCCATCCTGTAAGAATCATTCTTCAGCAANNNNNNNNNNNNNNNNNNNNNNNNNNNNNNNNNNNNNNNNNNNNNNNNNNNNNNNNNNNNNNNNNNNNNNNNNCAGACCTCTGGATGTCCTCAGGGTAGGTGGCACTGAACATCAGGGTCTGACGGTTTTCTTTGGATGGCATTCCAGGGGAGCCCACCA	5938:56:-
smaw_01_6608138	C01	6608138	201	-	A	G	ACACTCCGATGAGTCGCGGCTCTGGAGCATCCTGAAACAAGGGCAGAGAAGGTGAAGTTCTCCCAGTGATCTGCCACGCTCACATNNNNNNNNNNNNNNNNNNNNNNNNNNNNNNNNNNNNNNNNNNNNNNNNNNNNNNNNNNNACACAAATATTAACGTGGAAACACGCACCTCTTCAGGCGCCCTATCTCTTCCAGTCTCTGTTGGGCGAGTGCGGCCAACTCACTCTTCTCTCGCTCCGCGTCCACCAGCCGGCTTCGCGTCGCCTCCAAGTNNNNNNNNNNNNNNNNNNNNNNNNNNNNNNGGGCCCGACGTGACCAGGCGCCGCACCCCCTCACCAAGCTTCTCCGCCCAGGCCTTTTATCAGCAACTCAGACATGATTAAAAAG	5941:201:-
smaw_01_6611434	C01	6611434	46	-	G	C	TGTGTTGGTGCAGGTTCACGGCAGTGGAGCGGAGGAGGTGGAGAGCATGAGTGTGGAGGAGTCCGCTCAGGAGCTCGGCCCAGGTNNNNNNNNNNNNNNNNNNNNNNNNNNNNNNNNNNNNNNNNNNNNNNNNNNNNNNNNNNNNNNNNNNNNNNNNNNNNNNNNNNNNNNNNNNNNNNNNNNNNNNNNNNNNGATGACACCAAAGGCGTGACCAACGGCCATCATCAGACGCTTCCTCGCGCCGCCCAGGATGAGCCCGAGCCTCCCAAAACATCTCCCCCTCCAGCCAATCGGCCGGCGACTGCGGTGTCCACGCAGCGCTCGTCCCCCGACATGTGTGGCT	5947:46:-
smaw_01_6626909	C01	6626909	131	-	C	T	TGCACACCCATTTATAAAAAACGAGGGAACCATTCCTTTAATCAGTGGAGAGAGAGAAAGGGCTCACGACTGTTATTCCCTGCTGNNNNNNNNNNNNNNNNNNNNNNNGTCTCTCGCGAGTTCCACCGCCGCTACCGCCTCCCCTCCAGCGTCAACCAGCCAGCGATCACCTGCTCCCTGTCGGCCGATGGTCTGCTGGTTCTGACCNNGCCCAAGGTCAGCGGGGGGAGTGAATCTGGCCGCAGCGAGCGCAGCATCCCCGTCACCCGTGACGACAAGCCCAACGCTGCTGTAT	5967:131:-
smaw_01_6678283	C01	6678283	263	-	G	A	AGCTGCTGAGCGGGAAGTGAATATCACAGAAGAACTTTATTCTCTCCCACGCTACATCAGTGACAGGTATTCAAACTTAAGTTTGNNNNNNNNNNNNNNNNNNNNNNNNNNNNNNNNNNNNNNNNNNNNNNNNNNNNNNNNNNNNNNNNNNNNNNNNNNNNNNNNNNNNNNNNNNNNNNNNNNNNNNNNNNNNNNNNNNNNNNNACTGCGCTGGAAAAATGAGCATGGCCAACTGACGAGCGCGGGTGACGGTAGTTTAGGGCATCATTTAACGTTTCCACTTCAAGGTAAGTTTGAGTGACCGGTTGTTGTTTTTTTCCCATGGTGTCTGAAGTGATGTCAGTGAT	5997:263:-
smaw_01_6683923	C01	6683923	244	-	A	T	CTCCGCTTTGAAACCTTGTTCTTCAGTTACAGAACACTAAATGCTCTCCGTCTGTGAAGTCCTGCCCCCGCAGCACACTGTCAGANNNNNNNNNNNNNNNNNNNNNNNNNNNNNNNNNNNNNNNNNNNNGGTGGTGATGGCGCTTCCTCGAAAGACGCCCCCAAAGTTGTGAAAAACCCTCCTCCTCCCTCCTCATTTTCTTCCTCTCACTTTACTGATGTTTTCATCTTAAAAACACACTTTTGCTCGCCAACTATTGA	6000:244:-
smaw_01_6687541	C01	6687541	72	+	C	G	TTGTTCACAAGTCGAGTATTGCATAGACTGATTATAAAGGTGGATGACAAGACAACTCCCAAAGGTGAAGCCAAACCGTCTTGTTNNNNNNNNNNNNNNNNNNNNNNNNNNNNNNNNNNNNNNNNNNNNNNNNNNNNNNNNNNNNNNNNNNNNNNNNNNNNNNNTGGCTTCTTGAAGATGTTTCACCTTCATCCAAGAGTCTTCTTCAGGGTCATGACCTTCTATGTTTACATCAAACTTAGTCAGAACTGAAGAAGCCTCCCGGCGGT	6004:72:+
smaw_01_6695117	C01	6695117	227	-	C	T	GCTGTCGCTGTTCACTCGCTGCCTCTGGGAGGAACTACAGCGGAACACACAGAGGAAACACAGTTAGTGAAGTGAGCTCGCAGCCNNNNNNNNNNNNNNNNNNNNNNNNNNNNNNNNNNNNNNNNNNNNNNNNNNNNNNNNNNNNNNNNNNNNNGACGCGTGGAAAAGGTGATGTTCTGTAGAGGATGCGAACCCGTGTGGCCTGGACCTATTCTCCTCATCTCCAGCTCTACACTTTTGTNNNNNNNNNNNNNNNNNNNNNNNNNNNNNNNNNNNNNNNNNNNNNNNNNNNNNNNNNNNNNNNNNNNNNNNNNNNNNNNNNNNNNNNNNNNNNNNNNNNNNNNNNNNTATTTGCCCAGACCTCCTTATGTACCCAAATTTCTTGTAGTTGGCAGAACA…	6011:227:-
smaw_01_6709206	C01	6709206	176	+	C	T	AGCAGTATTTAACGTGACGTCACACGCAAAACTAGAAGAAGAAGATGGACTGAGGGACACAAGTCATCATGTAAGTGACAGACGCNNNNNNNNNNNNNNNNNNNNNNNNNNNNNNNNNNNNNNNNNNNNNNNNNNNNNNNNNNNNNNNNNNNNNNNNNNNNNNNATAGGAAAAGGCGACGGGGAGAACTTTTCGAATCCACCCCATGGGTGAGGTCGAATTATCAAATTGGCTCAGGAAGTTTCCTAAAT	6022:176:+
smaw_01_6711283	C01	6711283	19	+	C	A	GTTGCATTAAACTGCATTCAAAGTATTTAAAGTAACTGGTGAAACAAGAGTTGACTCATGCTAGGAAGTACTAAAAGGAAGCGCANNNNNNNNNNNNNNNNNNNNNNNNNNNNNNNNNNNNNNNNNNNNNNNNNNNNNNNNNNNNNNNNNNNNNNNNNNNNNNNNNNNNNNNNNNNNNNNNNNNNNNNNNNNNNNNNNNNNNNNNNNNNNNNNNNNNNNNNNNNNNNNNNNNNNNNNNNNNNNNNNNNNNNNNNNNNNNNNNNNNNCCAGCTCCTTTCGCCGTGCCCTGCTGTGCAGACTCGTGCCGAGTGCAGCATGAAAGTCAGATCACTGCTGCTTCACGGAGCGATGGGAGTTTTCTGGCCCGGAACTCTGTATGGCATTAAACCAGCAGTCATC…	6025:19:+
smaw_01_6743250	C01	6743250	245	-	T	C	TTCCGCATGAATCCAGATTCAGCCGACCAGGCTACGTTTTTCAGTCTTCAGCGGTCCAGTGTTGGAGAGTCTGGTGTCAATTGCANNNNNNNNNNNNNNNNNNNNNNNNNNNNNNNNNNNNNNNNNNNNNNNNNNNNNNNNNNNNNNNNNNNNNNNNNNNNNNNNNNNNNNNNNNNNNNNNNNNNNNNNNNNNTCTGCTCACCGCAGTTGTAAAGAGTGGCCAGCTCTGTCAGCTCCAACCATTATGACCATTCTCCTCTGAATCTCTCATCAGGTATA	6043:245:-
smaw_01_6828099	C01	6828099	161	+	T	A	TGCTCTTCAGAGGCAAACTGTGGTAAAGGGAGCAGCTGAGGAAACGCTGCCCCTCGACTTCGACAGGACGCCCTTGAGTGTCTGTNNNNNNNNNNNNNNNNNNNNNNNNNNNNNNNNNNNNNNNNNNNNNNNNNNNNNNNNNNNNNNNNGGCGGCCGAAATAGAACCGACAAGCATGGGCTGTGCGGCTGACTCGTGTTTTGAAAGGAAATCGTGATGATGCTGCACGACATAAA	6108:161:+
smaw_01_6834315	C01	6834315	310	-	T	C	GCGAGCGACGTCACCCCATTCAAAGTGAATGAGCGGCGTTTCCGTGCGAGCGCTCCGTTAAATATTTAGTATTTATCCAAAGCCTNNNNNNNNNNNNNNNNNNNNNNNNNNNNNNNNNNNNNNNNNNNNNNNNAGGATCCTTAAAACAATACTTGCATCGTTATTTTACTGCCACTGTTTTTAATGCTTATTAGTCGACAAGCTCAAGTGAAGCTGCANNNNNNNNNNNNNNNNNNNNNNNNNNNNNNNGTCACTGTGTAGCATGGATGGAGCCTTCATGTTTTTTTTATAGCCAGCTTACCTGACTTGAAGATCTGTCTTCACTGAGGGATGA	6115:310:-
smaw_01_6840408	C01	6840408	46	+	G	T	GCAGAATATGTCTTATTCGGTCCGACAGCATCTTTAGGCTTTGTTGTGTCTAGAAACATGACCATTGTACAATTCATCCCATTCTNNNNNNNNNNNNNNNACTGTAAAACAGCTAAAAGGAAGAGACGAGGCAGGGCGACGTCGGATCACATTAACAGCACTGGGGATGATGGGGTGTGACTGGAGGGTGGCCGTGCCCGGACATCAGGAGGAGAAATAAGCAATTTGGCAGCAAGTTCACCATTTAAAGTTATTAGAGTCCAA	6120:46:+
smaw_01_6842044	C01	6842044	58	+	C	T	ACAAAGGAGCTGTGTGTTATCGGCCAATGACGTTCAGCGAGCACTCATATCGAATTGCGTTATGAATTGGACAGCAGACTAATTTNNNNNNNNNNNNNNNNNNNNNNNNNNNNNNNNNNNNNNNNNNNNNNNNNNNNNNNNNNNNNNNNNNNNNNNNNNNNNNNNNNNNNNNNNNNNNNNNNNNNNNNNNNNNNNNNNNNNNNNNNNNNNNNNNNNNNNNNNAACAACAGGGTGTGGCACGACCCCAGAGCGGCAGCTGAAAGCGGGTCAATGAATGCAACTCTAAACCAGCATCAGCACAGCCCTC	6121:58:+
smaw_01_6862113	C01	6862113	10	-	T	C	CCACCCACCATTTAAAACATGCAGCCGTGCAGCCAGTGGACTGAACACACACCTTCAGCTTCCCATTCACAGATTGAATCGTAATNNNNNNNNNNNNNNNNNNNNNNNNNNNNNNNNNNNNNNNNNNNNNNNNNNNNNNNNNNNNNNNNNNNNNNNNNNNNNNNNNNNNNNNNNNNNNGCTGTGCCACCACTGGCTGCTGTCACATCCCCGATCCTGCTCGTTTTTTCCCGAACACCTGTTATCAATTTCCCCGCACGCACACCGACCTGGTCTGCCTCCACAGGAAGGTCTGGATGGGGAACGGTATGCCCTTCCCGCACTCCGGCTCGTTTTCGTCCAGGCTCTTCCTCT	6137:10:-
smaw_01_6865675	C01	6865675	245	-	C	A	GCCATGTTTGGTGTTTTATGGAGACGCGGTGAATGTGTTTCGTGGGATTAAAACCTGTGGATTTCTGGTTTAAAAAAAACAACCTNNNNNNNNNNNNNNNNNNNNNNNNNNNNNNNNNNNNNNNNNNNNNNNNNNNNNNNNNNNNNNNNNNNNNNNNNNNNNNNNNNNNNNNNNNNNNNCAAAGCGACCACGGATTGAGCCCCTGCCTGGCGCCGAAGACCAATCAATGCCAAGCTTCGCCGTGGGCAGACTGAACAACAAGGCG	6141:245:-
smaw_01_6869656	C01	6869656	151	-	T	G	CCTCAGCGGAGACGCAGGCGCCAGCCCTTCCTTTACGGTAGCTGAGGACATTAACATGATTCAACTCTGTTTGTTATCAGATAAANNNNNNNNNNNNNNNNNNNNNNNNNNNNAGTCTGAATATGGTTTGCCCACTCCTTATTCGCTCTCATCTTGGTCACGACTCCACCTTAGTTGGTTTTTCGGTTTTGGCTCTCA	6153:151:-
smaw_01_6877460	C01	6877460	249	+	G	A	TGAGTGTCACAGCTTCATCTCCAGTAGACCCCCCCAGACCCCCGAACAGTGAGTGTCCACCCCACAGCGTGTCCATAAAGCACCANNNNNNNNNNNNNNNNNNNNNNNNNNNNNNNNNNNNNNNNNNNNNNNNNNNNNNNNNNNNNNNNNNNNNNNNNNNNNNNNNNNNNNGACTTTTGTAAAAGTTCAATTTCTGTTTGCTTTTGTGAAGTGTGGATGGGAATTTTCAACTCTCTTCCGTCTCTTGTGCCCCCAGCNNNNNNNNNNNNNNNNNNNNNNNNNNNNNNNNNNNNNNNNNNNNNNNNNAGATGTTCAAGTCGCAGAGCGCCGCCAGCGACACGAGCAGCCAGTCGGAGCAGGACACCTCCGAGTGCACCACCGCCCACTCTGG	6159:249:+
smaw_01_6878486	C01	6878486	10	+	G	A	ACCAAAAACGGCAACATGTGTGTTCCCCTCGCTCAATCCCTTCCGCATCATGTCTTATTCGTAACACTGTGCATTACCATGTCCANNNNNNNNNNNNNNNNNNNNNNNNNNNNNNNNNNNNNNNNNNNNNNNNNNNNNNNNNNNNNNNNNNNNNNNNNNNNNNNNNNNNNNNNNNNNNNNNNNNNNNNNNNNNNNNNNNNNNNNNNNNNNNNNNNNNNNNNNNNNNNNNNNNNNNNNNNNNCACTCTCTCTGTCTTACGTATGTGGATGTGGAACCATCTTCATACAGTACTTGATGTCATGTCTGTCTGTGTTTGGCCACCTCTCCCCGTGCGCACGCCG	6161:10:+
smaw_01_6893677	C01	6893677	35	+	G	A	CCCTCCTCTACAGCACAGAGACCCTCACGAGGTCGACCAGTAGTGATTTTTGTTTTGCATGAGGTAGCGGGAGGTGATTTTCCTTNNNNNNNNNNNNNNNNNNNNNNNNNNNNNNNNNNNNNNNNNNNNNNNNNNNNNNNNNNNNNNNNNNNNNNCCGCTGTGATCAGGGCCACAAGGGAGGCACTACGGCTAACCACGCCATGTCAGGAGGGGTCAACACCAGGTTAAGACTTTATTATGNNNNNNNNNNNNNNNNNNNNNNNNNNNNNNNNNNNNNNNNNNNNNNNNNNNNNNNNNNNNNNNNNNNNNGTCCTGTGTTTGCCACCAGGGACAATCTCCACCTCCTGGAGGAGGGCCAGGGTATGCCGAGGGAGGAGCTGGACGAGCGCATCGC	6178:35:+
smaw_01_6895374	C01	6895374	69	-	G	T	CATGAATCAAGGGGAACTCTTGCCAGTGATCCCTCGTTAGTACACATAGTTACACAAATCCACATGTGCATTTAACTCCTTCTCCNNNNNNNNNNNNNNNNNNNNNNNNNNNNNNNNNNNNNNNNNNNNNNNNNNNNNNNNNNNNNNNNNNNNNNNNNNACACGCCACAGCAGCACTTACGGTACATCACCCACGAAGACAGTGCTACGGAGGACAGTGCCAAGAAGCCGTCTATCTACTGTTA	6180:69:-
smaw_01_6901606	C01	6901606	293	-	G	A	CCCGTCTCTGCGGGTCCTACCTGTGTGTTCGCAGGGCCGTGCAGGTCAGCCGTGACGGTGGCCGAGGTGGCAGGGGGAACTTCCANNGTGGGGTACTTTGAAGGGGCAGGACTGGCCTTCCTGCCTTCAGCTGGAGGCTCCAGAGTGCTGGGAGTCAGGGGCTTGCTCATCCCCTCAGACGCCTCCGTGAAGGTGACCGACCTCTTTTGGTCATGCGCTGTGGGACATACATGCATGTTTCAAAACAGAGACGGTGNNNNNNNNNNNNCAGCTAAATAAGAACAACACTCTATTTGTTCACTTGCTTTAATGGATAATAGCAGCGAAATGACAATAATCAAACATGTCATGAGCA	6189:293:-
smaw_01_6911320	C01	6911320	237	+	C	A	GAGCCACCAAGGGGGCAATCAAGATGTTTGGGCACATAAAGGAGCTGTCATGTCGTCCATCTTAATTTACAGTCTATGGTTTGCANNNNNNNNNNNNNNNNNNNNNNNNNNNNNNNNNNNNNNNNNNNNNNNNNNNNNNNNNNNNNNNNNNNNNNNNNNNNNNNNNNNNNNNNNNNNNNNNNNNNNTATCATGGATACTCCGATGGACATTCCCATGAACTTGCTCTTGGTCCACACGTGTGTGTTCACGCACATCTGTCTCTCCTGGCAT	6194:237:+
smaw_01_6916715	C01	6916715	99	-	C	T	TCTGCACGCAGCACCACACAGAGGCCATGGGGAAGGTACGACCGCACGCACGCACGCACATGATGGAGCTACACGGATTTGCTGCNNNNNCTTTTTTGGTGTTTGTTTTCAATACTGTGTCTTGAAACGGAATGTGTGAGGATCCCAAATAGAAACTTGTGACTCTCGTGCAGAA	6196:99:-
smaw_01_6928155	C01	6928155	210	-	A	T	GATTGTGTTCGTGCATGAAGTGGTTTGGACTAGAGATTATGTGGCCCAGGGTTAATTGACATGCCCGAACACTGGAAAATATGTTNNNNNNNNNNNNNNNNNNNNNNNNNNNTTTTTTCTGCCCACGAACATTCGCTCTGAGAAGCTGGAAGAGGCTTCGTGCATGGCCCACGCTACACTGACATGTTGGAATGCCACATCGATGTTATTCGCAGCTGCACTGGGAAACCCGGGGGCCCCAGAAAGCATCTTTATGTGCATGTAAGCGCAG	6208:210:-
smaw_01_6958251	C01	6958251	286	-	G	C	GGTTTGAGGCAAGGCAGAGAGAGAGAGATCTCTGCTTCTGTTTCGCGTCCGCTCTCTTTCGCTTTTCAGGGAACGGCTTGTGTGTNNNNNNNNNNNNNNNNNNNNNNNNNNNNNNNNNNNNNNNNNNNNNNNNNNNNNNNNNNNNNNNCCACCCTCCAGAAGACACTGAGTTCCCCACATATGAGACAGGGTCAACCACTTGGGAAAAAGGGGTCTCGCATCGACTGAGTTAANACTGCCCAAGTATTGCATTCTGGAGTGCGGTTCCAGACTCCCACATTAGGTCGCTGCCTTTCCTCTCGGGGTGGCCACCCTGTGA	6230:286:-
smaw_01_6973150	C01	6973150	12	+	C	T	CACACGCAAACCATTTTCTTGATAAATTCGTATAGTCTTTGAGGAAGCAAGCTATACAATCTAAGATCCGACAGGTGGTGAGCATNNNNNNNNNNNNNNNNNNNNNNNNNNNNNNNNNNNNNNNNNNNNNNNNNNNNNNNNNNNNNNTCAGAAGCAGTTGTGCGTTCTAGATCTTAGAGACCCTCGCACTCCGCCGCAGAGCAATGATGCTGCGGCGGAGCACAAAACCTCANNNNNNNNNNNNNNNNNNNNNNNNNNNNNNNNNNNNNNNNNNNNNNNNNNNNNNNNNNNNNTGGAAACAAAAGCTCCACGGCACAGTGTCAACATCAGATGGAGCAAATCCAAATTTGGCAACATCAGACACAATGTACAGTACAG	6245:12:+
smaw_01_6983463	C01	6983463	10	-	G	T	TGCTACCCACCGATTCCCGCAGACGATAAAGTTTTACATCCACAATGCACCACTGACTGGCTCGACACTGCTCCCTGCCTGCCTGNNNNNNNNNNNNNNNNNNNNNNNNNNNNNNNNNNNNNNNNNNNNNNCTCTCCTCCTCTCCCCTCTTTCCCCTGCTCCCTTCCTGCCCCTCAGGGTCCTCGCCTCCTCTTATCCGACTCCTTGTCGCTCCTGTCCTCTACCATCCCGCGTCTCTCCTTCAATCTGGCGACATG	6257:10:-
smaw_01_6987390	C01	6987390	48	+	T	A	AGGGATACGTTCATGACCAGGGGACTTCTGTGGCAGCAACACACACATGCACCCATAGGCGGGTAGCCGCCGCGACGGCAGACCCNNNNNNNNNNNNNNNNNNNNNNNNNNNNNNNNNNNNNNNNNNNNNCTATTGTATGTGGAGCGGCCATTTGTCTGCCCCTGTATAGGGGTTACTGTTTGCCCGCACCTCTAAAAAACGATGCGTTGACAGCCGCTGTAAAATACCCGGTAGCCTTTGCACAGTCTCCATGAGTCAGCAGAACCTTCTAGCATGACGGTACAGTAGTAAATGTGAGCC	6258:48:+
smaw_01_7001614	C01	7001614	61	+	G	A	TAGTACAACATTAGACACGTGAGTGTCCATAAAGGAAACGTGGAGGTCGTATGAAGGCCCGCGACAGCACGCGACATAACACAACNNNNNNNNNGGCAAACGTTTGCAATTCCTTTGCCGCCTGATTTTTTTTTTCATTTTATCCCAGCACATTTAGTGCCCTGAAAATCGATGGCATCTCGCTGTCCCTTGCGTAGCAGGCTTTACATGTTGATGGTGATAAATTCTGTCATATCTAGATGGATGCAGTTGTTATCAAGNNNNNNNNNNNNCCGGCCGCGTCGGTGACAGAGGTCAAATTTAATCCTGACAGACCCAATCTGGGTTTGTTGCAGATATATGGCTCAGTAGACCGAT	6281:61:+
smaw_01_7017077	C01	7017077	61	-	C	T	CCGTTTTGGGGATTTGGTCCACTGAAATTCAGCAACACGTGTTATGTGAGCTTGATGGACGATGAGTATGTTAAGGTGGGAGTTTNNNNNNNNNNNNNNNNNNNNNNNNNNNNNNNNNNNNNNNNNNNNNNNNNNNNNNNNNNNNNNNNNNNNNNNNNNNNNNNNNNNNNNNNNNNTCCAAGGACGAAATGAATGGCACCGACGTGTGTTTTCGTAGCTGGTGTGGTCGCACATGCATAAGTTCCAGACAAACTTCCCAGCA	6285:61:-
smaw_01_7017302	C01	7017302	157	+	C	T	AGAGCATTATTTTCTTGACTGCTCCTCTGAGGGAGAGAGCGACGGTGCGCCATTAAGTGTTTTTTTTTAACAACACAGTAATGTCNNNNNNNNNNNNNNNNNNNNNNNNNNNNNNNNNNNNNNNNNNNNNNNNNNNNNNNNNNNNNNNNCATTCCCCCATCTGCTGCGGCTCGGGGAATATATTCGCGACTCAAGGAATTGTTTCAAAGTCTTCATCGTTGTGCAGTGGGCGGA	6286:157:+
smaw_01_7018221	C01	7018221	52	+	C	A	CCACTGCCCGACGTTGAACGCACAAACACGAGTGAAGTACATTTTTCAAATCAGTGAAATAACGGAATTTCACATATTGCTTTCANNNNNNNNNNNNNNNNNNNNNNNNNNNNNNNNNNNNNNNNNNNNNNNNNNNNNNNNNNNNNNNNNNNNNNNNNNNNNNNNNNNNNNNNNNNNNNNNNNNNNNNNNNNNNNNNNNNNNNNGATTCATGCACATTTTGATCGGCTTGACAGGTGGCAACAAGGCCCCGTGTCACACTGACAAACGCACGAGCCATGGGATGGAGACATGCGAGAAGCGCCGGTCCTTGGCAACGCGAGTGATATCGCAGCA	6289:52:+
smaw_01_7046371	C01	7046371	17	+	A	G	CCTGTGGTTTCTAAACAACGTCCATCTGTTTGCGACTCGCCGTCTTGTCTCTCGAGTACAAGCCAGCATGCTCTCCGTCTCTGATNNNNNNNNNNNNNNNNNNNNNNNNNNNNNNNNNNNNNNNNNNNNNNNNNNNNNNNNNNNNNNNNNNNNNNNNNNNNNNNNNNNNNNNNNNNNNTTGTGTTTTCTACAAAATTTGGAATTGTGCATCTGTCGCTTCTGCAATGGCTCCAAATGTGTTTTTAAGGAGAGTGTGATGTTATCACTTTAATATTACGCTAAATCTTTTC	6329:17:+
smaw_01_7048322	C01	7048322	8	+	C	A	GGCCGCACTCTGAGTCACAGCCGTCAGTGCCAAAAAAAACCCAGAGGAACGCGTAGATTAGAGGAGCCCAGTTGTATTCAACACANNNNNNNNNNNNNNNNNNNNNNNCCTCTCTGTCTATCATGATTATGTAGAACTGAAAGAAGGCCACTGACAGCAAACAGCCACCGCATGTGGGACTGACGGCTGACAGGGTGCGCGGCATTCGCGTTTGGTAGCTCGGATATTGCGCGTCTCCATTCATACATGCAGAAAAAAAAA	6335:8:+
smaw_01_7053834	C01	7053834	17	+	G	A	ATTTATTCTGGTGAACGTAAATCACAGCCACATTTTCATACTTTGAAAATCGTGAGGTCGGACACTTTGTCAAACTTTGCAAGTTNNNNNNNNNNNNNNNNNNNNNNNNNNNNNNNNNNNNNNNNNNNNNNNNNNNNNNCGCGGTTATGTTTACGCGTTCACGCCTGTCTCCGCGCGGAGTCATTGTGGATTCAGGTCTGAAGGGAGATGCACCTCGCAGCGAAATGCAAAATAGCCCAGGATCGGAGCGTTCCCCCAGAG	6342:17:+
smaw_01_7058315	C01	7058315	74	-	G	A	TTGCATGGATAAGGAAAATCCCACATGTTTTGGCGCACGCGGGCGGCACTTTGGTTTGTGCGCGTTTCGTTCACACGATCTCCAANNNNNNNNNNNCACCCACCTGCGTCGAGAAGGACTCCGAATAAAGTCGCGAAGGCGAGAAGACGCATTCTCCCCCGCAAATGGCACTCGGGTGGGGNNNNNNNNNNNNNNNNNNNNNNNNNNNNNNNNNNNNNNNNNTGGGGGGGGTGGAGGCTGCGGAGGACGCACACGCTCGCGGATCCGCGCATCCTCTCGGCTGCCTGTAGCCTCACAGTGCGAGCAG	6346:74:-
smaw_01_7060471	C01	7060471	273	-	G	A	ACGGCAAAAAGGCTCAAGTCACCGTTTGTTTTATACACGCAAGACACAATAATCAATAGGACCTGCAAATAAATTTGGATTACGCNNNNNNNNNNNNNNNNNNNNNNNNNNNNNNNNNNNNNNNNNNNNNNNNNNNNNNNNNNNNNNNNNNNNNNNNNNNNNNNNNCCGATTCATGCTCGAACATTTTCGCCTCCGAGAATTAAGATAATTCGCCGTCTTGGAGAGATTTAGGTGAAAACACTGAAACTATACCCTGGTATACTCGTGATGACTCCGTTTAAATCGATTGAAAAAATACT	6349:273:-
smaw_01_7191023	C01	7191023	65	-	T	G	AGAGTTGACAGTCACTAGCAGCTCAACATGGAAAGTCATGACGAAAGCCTGCTCTCTGCTGTTGAGGATTTCTCACCCACGCCTGNNNNNNNNNNNNNNNNNNNNNNNNNNNNNNNNNNNNNNNNNNNNNNNNNNNNNNNNNNNNNNNNNNNNNNNNNNNNNNNNNNNNNNNNNNNNNNNNNNNNNNNNNNNNNNNNNNNNNNNNNNNNNNNNNNNNNNNNNNNNNNNNNNNNNNNNNNNNNNNNNNNNNNNNNNNNNNNNNAAGCCCAGACAACATGGAGGCGAGGGCCTGTTCTGGGTATAGGCGACTTAGGTGTGCAGCAGCACAAAAATGCGCACAACTGGGC	6393:65:-
smaw_01_7213545	C01	7213545	131	+	G	A	CATGTCGGGCTGGACGGTGGGAAACATGGCAGGAGAGCAAAAGGTGAGAAGTGCATAAGGGTGAGACGAGAGAGGAAAGGAATCANNNNNNNNNNNNNGAGAGTTTTTGGAGCCTCTAGAAGGTCTGGTCGTCGTTGCAGGACTCCGTGGCGTGTCCGAACGCCTCACAGATGTCGCAGTAGG	6399:131:+
smaw_01_7225064	C01	7225064	57	-	T	G	ATGGTGGTGGGTGAGTCTGGGAGGGGCTTGTTCAGGCTTACATAATGGAAGTGCTCAGCTTCTTTAACCCGACAGTGAGAGGGAGNNNNNNNNNNNNNNNNNNNNNNNNNNNNNNNTGCTCTCCGTTTGCCTCTTGTGGTTGTGCATGGCGGGGGGATGAGAGCTGATGATTTATTGATGCCCAGCTTATGTTAGTGTGTGCATGTCACAGTGCAGAGAGAGGGAGAGTGTTTAGCAGATGGACGTCAGGTTGAAGTCCGGCGGT	6407:57:-
smaw_01_7253183	C01	7253183	263	+	A	C	AATTTTTCCCCAGATCTGTGCCACGATACAATGCTGTCTCGGAGGTCTACAGACAATTCCTTGGACTTCATGGTTTGGTTTGTGCNNNNNNNNNNNNNNNNNNNNNNNNNNNNNNNNNNNNNNNNNNNNNNNNNNNNNNNNNNNNNNNNNNNNNNNNNNNNNNNNNNNNNNNNNNNNNNNNNNNNNNNNNNNNNNNNNNNNNNNNNNGATCCGATACTACTTTTGCTCCCTCAATTTAATAGTTAAATAGGTAGAGGGAGACAAGGCTCACGTCGCTCTGGAGCATCTTGGGA	6416:263:+
smaw_01_7254824	C01	7254824	212	-	T	A	TCTGTCTGCTCTGATTGGCCAGCTTGCCCAGTCGGTTGTGATTGATCAACCAATTTCAAGACGTGTAGGAAATGTCACGCCCCTTNNNNNNNNNNNNNNNNNNNNNNNNNNNNNNNNNNNNNNNNNNNNNNNNNNNNNNNNNNNNNNNNNNNAAGGGGGCGAGAAATCTGAACTAGTTGTTCAGAGCCAGGCTGTAGGGTTTAGGCAGCTTACAAGAAAGGATAGGGTTGTCTTTTTCTCAGTTTGTGGGCCGGCGGT	6418:212:-
smaw_01_7316321	C01	7316321	258	-	C	T	AATGAATGTCGGTGGCAGATCACATAGTCCATATTTTTTCACATCCACAGCGCCGTGCCACTCGCGCGGTTTAAAATCATCTTACNNNNNNNNNNNNNNNNNNNNNNNNNNNNNNNNNNNNNNNNNNNNNNNNNNNNNNNNNNNNNNNNNNNNNNNNNNNNNNNNNNNNNNNNNNNGAACGGCTGGCGCACTCTGTGATGAAGCTGTTTTGTCACTCCGAGTTCCGCACGGGTGGAGCGCGAGGTATTTCAGAGCGTGGGTG	6450:258:-
smaw_01_7350609	C01	7350609	263	-	C	T	TGAAAAGCGCCTTTGAACAGCAATTCTGTGCAGGACACGGCGGCTTTGAGGAAAAACCTGAAGTGTGAGGTGAGAGATATAGTCANNNNNNGGGAAGTGACAGAGCAAGAGAAGGGGGACGGATGGAAGCAGAGAAGGGATGTGTGTGTGTGTGTGTGTGTGTGTGTGTGTGGTTANNNNNNNNNNNNNNNNNNNNNNNNNNNNNNNNCGGCCACTTTCATTCCAGGAGATGTCATGCTGGTTGGGCAAACGGTTCTGCGTCGAGGCCGTCCACCGCCTGCTGCCGCGCCGCCGCCCCTGCTGTACCCGGCCCGCCTCGTGCCAACGCCTCCGCCGCCGC	6471:263:-
smaw_01_7379420	C01	7379420	210	-	G	A	GGATTAAAGTGAGAGGAGAGAGATAGAGGAGAGGGGTGGGGGGTGGGGGGGCTTTGAAGTCTGCTGAGAGGTCTAGGAGAAGAAGNNNNNNNNNNNNNNNNNNNNNNNNNNNNNNNNNNNNNNNNNNNNNNNNNNNNNNNNNNNNTCACCTGTTGACACTCGAAGGGGCGAAGACACTAGATTTCAACTCTTTGAGCTGCGAGGCTACACGTTCGTCTCCTTCTCCTTCTCCTTCTCCTTCTCCTTCT	6488:210:-
smaw_01_7389769	C01	7389769	291	+	C	A	TCCTTGAGTGGTTGACCCACTGTGAGGGATTAGCAAGGCCTGTGCTCAGCCCTGCACTGATACTCAGGCTGCACACACACACACANNNNNNNNNNNNNNNNNNNNNNNNNNNNNNNNNNNNNNNNNNNNNNNNNNNNNNNNNNNNNNNNNNNNNNNNNNNNNNNNNNNNNNNNNNNNNNNNNNNNNNNNNNNNNNNNNNNNNNNNNNNNNNNNNNNNNNNNNNNNNNNNNNNNNNNNNNNNNNTAGTTGATGGATTTACAGCTCGCTGATTGGCTAATCTTCCATGTCAACATCAATAACGTGGCGAATCAGTCGGACCTGTCGGCAG	6497:291:+
smaw_01_7405572	C01	7405572	8	+	G	A	CACAAGGGGAATGGGCTCCGCACATCATCCATGTTACCAACAGTTTATGGCCACTGTGTAATGAGAGACCGCCTGATGAGGCCGTNNNNNNNNNNNNNNNNNNNNNNNNNNNNNNNNNNNNNNNNNNNNNNNNNNNAGCCAAAGCTAGGCTAAGCCAGCTAGCTACATGCGAGAGGTCACTTTACTACAGCTGGTGAGGCTTGCCTCCGTCATCGCGCAAATTAGCGGGTTCACCCGGGTGTGACGTTCACATCATTGCAGATCGGAGGTGAA	6503:8:+
smaw_01_7417644	C01	7417644	302	-	G	T	CTTGTTGCCGCTCCTGTTTGTCTCTTGCGCGAGCAGAGTGTCTGTCAGCCCTGGTGTATTTGGCGTTCTTGAAAATTCATTGTTTNNNNNNNNNNNNNNNNNNNNNNNNNNNNNNNNNNNNNNNNNNNNNNNNNNNNNNNNNNNNNNNNNNNNNNNNNNNNNNNNNNNNNNNNNNNNNNNNNNNNNNNNNNNNNNNNNNNNNNNNNNNNNNNNNNNNNNNNNNNNNATGATTTTCAAAGGAGTTGCTCGTTTCTCGTTTTCCAGCCCGTCCACTCGGCGTGCCAGAGTGTCCTTCGAACGGCAAATTGCGCC	6516:302:-
smaw_01_7433375	C01	7433375	142	-	G	A	GACAACCGAGCCAGACATCTGGATTTGACATCTGAACGTTTCAATACAACTCATCTCCAATCATCTTCAAAGTATAGCTCAGGGANNNNNNNNNNNNNNNNNNNNNNNNNNNNNNNNNNNNNNNNNNNNNNACGACGCGGTCAAGGGGGATGTGAGAATACGAGTGTGCGGAGTGGAACGCTGACTCGGTGGCGGAGGGAAAGAACACACAGACGAAA	6528:142:-
smaw_01_7434087	C01	7434087	32	+	G	A	GGATATTTGTGACACACCACATGTTGTCTCCGAGAGGGCGTTGGCAAAGGCCCCGCTTGAAAGTTTTAGAAGGTGTGTGTCGCGTNNNNNNNNNNNNNNNNNNNNNNNNNNNNNNNNNNNNNNNNNNNNNNNAGTTGCAGGCGGTAGAAAAAGAAGTACTGTCGCGGAAATGCGAGAGTCCCACGTGCACGTGCCGCTGTGTACCCCGCTGTCCAGCNNNNNNNNNNNNNNNNNNNNNNNNNNNNNNNNNNNNNNNNNGGCTTTGCGAGGGAGCAGGGTGGACGGCCAAGCTGCTGAATGTCTAAGCAGGGGCTGCTGCGCATGTGATTTATTGGGAGGAGCGCGCATTAGGGCCCATTC	6531:32:+
smaw_01_7437585	C01	7437585	146	+	A	G	GCTACAGAGCAAGCCAGCGCGAGACGTCTGAGGGAGGAGGGGAAAAAGAGAGGCAGCCAGCAGGGGGAGGTAAGACAAAAGGAAANNNNNNNNNNNNNNNNNNNNNNNNNNNNNNNNNNNNNNNNNNNNNNNNNNNNNNNNNNNGAAGACGGAGGGGGGAAGGTTGAAGGAGGGATGGGGGTCTCTCTGCTGGAGCCCTTATCGATCTCATTGGTTTTGGGTCATATATTACAAGCGTGCCCCGGCTGAGTGGCGGCCAGGGCCAGACGTCCCCC	6537:146:+
smaw_01_7443675	C01	7443675	212	-	C	T	ACCCGAGTGAGGGAAGGAATACATGTCACTTAATGTGTGCAGCAGGATGTTGGAAAAATGTTCTATCAGTCTGTTGTTGCCAGCGNNNNNNNNNNNNNNNNNNNNNNNNNNNNNNNNNNNNNNNNNNNNNNNNNNNNNNNNNNNNNNNNNNNNNNNNNTCAAGAAAGCTGGCTCCCTAATAGGCTGCAAGATGGACGCATTTGAAGCAGTGGTGGAGAGGAGGACTATGAACAAACTGTTGTTCNNNNNNNNNNNNNNNNNNNNNNNNNNNNNNNNNNNNNNNNNNNNNNNNNNNNNNNNNNNNNNNNNNNNNNNNNNNNNNNNNNNNNNNNNNNNNNNNNNNNACAGGAAATCTTTCCTGCCACAAGCCATAACACTTTATAACACCTCACCTCTGGC…	6542:212:-
smaw_01_7475036	C01	7475036	47	+	A	C	CTATGCTCTTTCTCTCTCCTCACTTTGTCTCCCTCCCTCTCTTCTGAGAGCGTGTCTGGTGGCTGGGTCGACTCCTCTCCTCTCCNNNNNNNNNNNNNNNNNNNNNNNNNNNNNNNNNNNNNNNNGATCCGTGGGGAGGCTGCTGGATTGTGGAGGGGGGTTGGGAGGGGTGGCGGAGAGGTTGGGAGCTAAATAATGGATGATTTCTTAT	6564:47:+
smaw_01_7486904	C01	7486904	239	-	A	G	TGAATGAAATATAGTCTTGTGTGTGCGTGTAATTATACACGATCGCTAACAACATAATAAATGGATTTATTGTGAGCGTTATACGNNNNNNNNNNNNNNNNNNNNNNNNNNNNNNNNNNNNNNNNNNNNNNNNNNNNNNNNNNNNNNNNNNNNNNNNNNNNNNNNNNNNNNNNNNNNNNNNNNNNNNNNNNNNNNNNNNATTTCTTCTGTTTGCCTGCGTCTGTTTCCTGTCACAGTGTGTATTGTTTAATTGCGTGCTGCACACTTACACACACTCGCGCACACT	6580:239:-
smaw_01_7502145	C01	7502145	197	+	A	G	CAAGGATGCAGCCACACTCTCACACACCCACACGCCCATGCACCACATACCCGCGTTCCATTTTCATTTGCGGCCATTACACATTNNNNNNNNNNNNNNNNNNNNNNNNNNNNNNNNNNNNNNNNNNNNNNNNNNNNNNNNNNNNNNNNNNNNNNNNNNNNNNNNNNNNNNNNNATAAAGGTCGTGAATAATACATATTAAGCACTGTACTGAAGGCCGTAACCGAACTGCTAAAATATTGATCTTGGCCAATCATAAT	6590:197:+
smaw_01_7524135	C01	7524135	1	+	C	T	CCCGCACGTATCGGACAGCGTAGGTCCCCGCGCGCCCGTTGCTAACTGGCAGAATTCATAGTCAAAAAAGAGGCAGTTGAAAATTNNNNNNGGCTTTATTATGGGACATAGAAAGAGTAAAGGCAGGACAGGTCATCGGACGTGGATCACGCGGATGGTCCATGGAGACGCAGGCCCTAAAAATAAAAGCGCATACNNNNNNNNNNNNNNNNNNNNNNNNNNNNNNNNNNNNNNNNNNNNNNNNNNNNNNNNNNNNNNNNNNNNNNNNNNNNNNNNNNNNNNNNNNNNNNNNNNNNNNNNNNNNNNNNNNNNNNNNNNNNNNNNNNNNNNNNNNNNNNNNCCAAAGACTCCCTGAAGAGGATCACTCGGACCGATAAACCTGACGGTGAGGTGACGGAT…	6609:1:+
smaw_01_7527927	C01	7527927	200	-	T	C	CACACGTATGAACAAAAACACTGATGGTAGCTCTGTCCGAGTAAACCAAAGAGGTAGAATGTAGCATCAGGGCATTGGAGCTGGANNNNNNNNNNNNNNNNNNNNNNNNNNNNNNNNNNNNNNNNNNNNNNNNNNNNNNNNNNNNNNNNNNNNNNNNNNNNNNNNNNNNNNNNNNNNNNNNNNNNNNNNNNTGTCCACCACGTTTGCTTCAATTTCGCCCTGCGCGGTTTTCAAAAGGTGGCCAAAAGTTCCAGCTGCCGCGGAGATCAGACGATC	6610:200:-
smaw_01_7555618	C01	7555618	75	-	G	A	AACAGCCCAAGTGTTGTCAAGTAATTGCTGCGTTGGCGCCGTGGGACTTCATCCTCCCAATCGGGGGGAAACAACAGTACATTTANNNNNNNNNNNNNNNNNNNNNNNNNNNNNNNNNNNNNNNNNNNNNNNNNNNNNNNNNNNNNNNNNNNNNNNNNNNNNNNNNNNNNNNNNNNNNNNNNNNNNNNNNNNNNNNNNNNNNNNNNNCTCTTATCTCCTCCTCTCTCACACTTTGGACCAATCAACCCACTTTTCTCCCCACTCCATCCTCTTTCCTTCGCCCCCTTGCACTGAATCATCTCCTCCGGCTGCTTTTTCTGCACGTCTCCCTTGAAAGTTGTC	6636:75:-
smaw_01_7560443	C01	7560443	33	+	G	A	TTGAACTCCTCTGGCCCCGTTGCGGATACAGCGTTTGGTGCCGCCTGATGTCTGCTGGATTTAACCCGCACAAGTTTAGCTTAAANNNNNNNNNNNNNNNNNNNNNNNNNNNNNNNNNNNNNNNNNNNNNNNNNNNNNNNNNNNNNNNNNNNNNNNNTATCTTATCGACTCTCTTTAGTAGCGTTTCAAAGATAGGGAAGAAGTGCCACCTTTTTAGGTTGGGTAAGTAAGATCGCTCGACGT	6638:33:+
smaw_01_7565182	C01	7565182	262	-	A	C	AGACCAGGGATGTATAGTTTTTACACCAGCCACTCTCGCGGGGAGCTAAACGATTCATCAGGGACTAATAGCGCTCTTGTTTCAANNNNNNNNNNNNNNNNNNNNNNNNNNNNNNNNNNNNNNNNNNNNNNNNNNNNNNNNNNNNNNNNNNNNNNNNNNNNNATCTGGTCAGTCTGGTTTGAGTCATGAGGCTATAGTTTTAAAAGCAGTGGATCACGCTGGATTGGTCATGCCCAGGCAATACTCTTCCCCCCGCTGCTCTGCCAGGGAGAACATTGCCTGTGATGTTGATGAGCTCCTTTGGCCGGATGGAAAGGGAAGGCGGGAAGCAACCTCATGTTCTTTTTCTTTACACAAATGCATGAACACTTATTTTCTACTTTCTATT	6642:262:-
smaw_01_7581039	C01	7581039	283	-	T	C	TCTCCTCTCTCTCTCTCTCTCTCTCCGAGGGGGAAGCCTGAGCCGTGGACGGCGGTGGAAATGAGCTCGGCCATGCAGTAAGTGTNNNNNNNNNNNNNNNNNNNNNNNNNNNNNNNNNNNNNNNNNNNNNNNNNNNNNNNNNNNNNNNNNNNNNNNNNNNNNNNNNNNNNNNNNNNNNNNNNNGATGGGGCCTCAGCTCCCATGCCCTCACTCCCAGTGTTCATCAGCCAATCTGGAGGAGCAGCCGAGCGGAGACGCGCTAATTCTGTCTATACGACGGACATTTCGACTGTTGTG	6654:283:-
smaw_01_7586666	C01	7586666	182	+	C	T	CACAAGGAGAACGGGCTCCGCACATCATCCATGTTACCAACAGTTTATGGCCACTGTGTAATGAGAGACCGCCTGATGAGGCCGTNNNNNNNNNNNNNNNNNNNNNNNNNNNNNNNNNNNNNNNNNNNNNNNNNNNNNNNNNNNNNNNNNNAAGCCAGCTAGCTACATGCGAGAGGTCTCTCTACTACAGCTGGTGAGGCGACAGCAGTTACCGACGGGGGAGTCGAGCCTTCGTTGCCTCCGTCATCGCGCAAATTAGCGGATTCACCCGGGTTCGACGTTCACATCAATGCCGATCGGAGGTGAA	6661:182:+
smaw_01_7632048	C01	7632048	184	-	C	T	GGAAAAGTTCTACCAACAGGCAGGCGAAACGCCGTTAAAAACATACTTTTATGTATGAAATATACACTGTTTGAGTAAAAAAAAGNNNNNNNNNNNNNNNNTCCACCTTGTCTCATGGTCTCCATGTCTCCCTCGGACAGGAAGCTGAGCAGGGCCCGCGCGACAGCAAGCCGCAGCGCCCCCGCCTGGCTGGACCTGCCGCCGCCGGTGACGGTGCACTCCAGGTCGAAG	6695:184:-
smaw_01_7632270	C01	7632270	31	+	T	A	CACATGCCAAGCCCACAGGTAGACTGATTATAATATCATACAGCATTGACTAATATATATATATTGTTAAATGAACCCCATGTGTNNNNNNNNNNNNNNNNNNNGAGTATTAACACTGTAAAAGGTGGAAAAAAAATTGCCCCAACATGCACACACGCACGCACGCGCACACACACACACACACACACANNNNNNNNNTAGCAACAAATTTAAATGAACCCACATCATCAACACAATGCCACACTCACCACTGTATGTCCCTCATCCTTCCTGTTTTCCAGCG	6696:31:+
smaw_01_7634128	C01	7634128	60	-	C	T	TTCTTCACCTCCAGCTCGGCGGTCAGGCTGCCGCGGTCCCCGTCCGTCGCGGTCGCGGGGTTCAGCACCGCTGCCTCCATGAGTCNNNNNNNNNNNNNNNNNNNNNNNNNNNNNNNNNNNNNNNNNNNNNNNNNNNNNNNNNNNNNNNNNNNNNNNNNNNNNNNNNNNNNNNNNNNNNNNNNNNNNNNNNNNNNNNNNNNNNNNNNNNNNNNNNNNNNNNNNNNNNNNNNNNNNNNNNNNNNNNNNTCAGCACTGATTACAGGTGGGCGGAGGAGGCGCAGCCCGTCACAGTGACAGTTCAGAGTGAGAGAGAATCACTGATCGATTTTTTTT	6697:60:-
smaw_01_7640004	C01	7640004	208	-	C	T	AAATCACGATGAGCAACAAGCGCTCATCAAATCACGGGAGAAATACATTTATTTCTTTTTTCTTAACTTTGGGATTTAAGCTGTTNNNNNNNNNNNNNNNNNNNNNNNNNNNNNNNNNNNNNATGTTTATGGATTTAAATCATATGTCTGAGCATATCAAGCTGGAATCGAGATGGTTTAGACTGAATTGGGGGGAAGCAGCTCGGCGTCTTACTTCGGCCGGCCGAGTGAGGGAGGAACATGGGAGTCCTCTCGGCCACGGGGGAGCGCTCCTTCCCCAC	6707:208:-
smaw_01_7661961	C01	7661961	81	+	G	C	GTCATTTTTACATATCACTGTGGTGTGTTTTACATCTAGTTTCGCATCTCTGTGGATGTTGCGCGCGTGTGTGTGTGTGTGTCTCNNNNNNNNNNNNNNNNNNNNNNNNNNNNNNNNNNNNNNNNNNNNNNNNNNNNNNNNNNNNNNNNNNNNNNNCGTGAAACAGTCACTTCAAACACAGGCTCCCTTCTGACACCGCCCACGATTGAACCTACTCCTTGTGGTGTGGAACCACCTCCTCTTGAAAGAAGCGCCGGACGTTCTGTCTGAAGAGGTCATGCTC	6715:81:+
smaw_01_7714808	C01	7714808	35	+	G	A	GGATGGAAATACAGCCGCTCACCTGATCCTGTGCGTTGGCAGTCGTCGACCTGCTCGTTGGAGGGTCTTGGACGCCGCTCCGAGCNNNNNNNNNNNNNNNNNNNNNNNNNNNNNNNNNNNNNNNNNNNNNNNNNNNNNNNNNNNNNNNNNNNNNAGGCCAGAAATGATGTTATTGCTCCACAAAAGCCTGTGGACACATAAAAAGTTTATCATCTGGGTGAGCAGAGGGTGAGCTCGCT	6756:35:+
smaw_01_7717411	C01	7717411	325	-	G	T	GACCCCGAGTAACGCGTGCGCGCGCTCACATGCACACAAGCACGCAACTTGGCCCGAGGACAGAGATGGAGAGCTCTAATTTCCANNNNNNNNNNNNNNNCCCTCCATCCCTTCAAACTCAATCTCCCGTTTCCCTCACACACAACTACGCACACACTTAGAAAGTCGCACGCATACGGAGAATANNNNNNNNNNNNNNNNNNNNNNNNNNNNNNNNNNNNNNNNNNNNNNNNNNNNNNNTTTTTCCAACATTTTCCTTTGCTAAACTCAGTTTATAAAACAGAAAGTGGACTCTTACTTCTGCCGTTTTGTCCTCCTCGCCCTCTCTCCATCTCCCGCCGGCGCACACAATTCCTCAAATGACACTGACACCTTTTGACCCCGTCATACGTGCTCAGT…	6759:325:-
smaw_01_7746701	C01	7746701	54	+	C	T	GCATGTTGTGTTAATGTCAGTCCAGTTTTGCTGGTGGGTGTGTTTACACAAATCACACCCCCACCTGTCACCTGTCACCAACCCANNNNNNNNNNNGTGACCCAGATACCAGCCTTCACGGCCCAGCGGCCATCCACCACCTCCAGTCCCCCTCGAAAACCAATCAAGACTGGTCCAGACTNNNNNNNNNGTGCCGGAGCCAATCATTTCACCGACAGGACAACTACTCGCTGAATCTGTTCTACTTTCATTATACTGAGCCTGAGGACAGAGAC	6786:54:+
smaw_01_7765264	C01	7765264	68	+	A	G	TGAATTCTCTTGATTAAAACCCTTCAGTTTTAAGTTCAAATGATGGCTACAGATCACAGACACACACATTTACTTTGCTTGCAGCNNNNNNNNNNNNNNNNNNNNNNNNNNNNNNNNNNNNNNNNNNNNNNNNNNNNNNNNNNNNNNNNNNNNNNNNNNNNNNNNNNNNNNNNNNNNNNNNNNNNNNNNNNTGCAACAAGGCGGATGATGTAATGTGGGTGAATTCGGGACACTGTGGGGATTGATCCGATGACCCACACTTAATGAGTGGTCTGTCNNNNNNNNNNNNNNNNNNNNNNNNNNNNTGTAAGGTGTTTGATTGTGTCTAATTACTTTTACACCCAATTAGGTCTCCTTGCAGGACAGGGGAAATTGATGCGGCCAGCTGTA	6799:68:+
smaw_01_7767034	C01	7767034	140	+	G	C	GAAAGGAAGAGAGAAGTGTCAACACTGCTGAAAGATTTTGAAAACTTTGAAATAAAGTGCAAACCTCAGCCGATCGCGATAAAAANNNNNNNNNNNNNNNNNNNNNNNNNNNNNNNNNNNNNNNNNNCATGGATGCTCTGATCGAGACGACCACGAGACTCAGAGAGTTTCACGGTTAAACAGTTGGTTCTTGAAACGATCACCCTCGCAGTCGCTCTTGTTCACCGGTCAGAAGGAAAAAAGACTCTGAAGGTATGTGCTCGCATTACTTGGGTGAAAAAAGCTACA	6801:140:+
smaw_01_7771938	C01	7771938	239	-	C	T	TGCCCTGTAAATGCTCATAATATTAGTGCTGCTTTAAAGGGCCCATATTATGCCCCCTTTTACACAAGTTACATTGGTTTTCAGGNNNNNNNNNNNNNNNNNNNNNNNNNNNNNNNNNNNNNNNNNNNNNNNNNNNNNNCACACAGCACCCTTCTCTTTCTGTATAAACAGCCCTGTGAGACTACGGTCGATTCCAGCGTTTTCCTGCTCACTCCTCGCCCCCCTCCCTTCGTGTTCCGCAAAGCTCCGCCTCGCTCCTCCCCGGGTCTGCTGCCATGACAACAGTCGCACGTAACAAGGCACAGACA	6803:239:-
smaw_01_7793714	C01	7793714	19	+	C	T	AATCCCCCTCGTCCCTCCCAAGCCGTGACCTGAGAAAGAAGAGAGACACCAGCCCCCGTCAGTGACACTCTCTCTCTCTCTCTCTNNNNNNNNNNNNNNNNNNNNNNNNNNNNNNNNNNNNNNNNNNNNNNNNNNNNNNNNNNNNNNNNNNNNNNNNNNNNNNNNNNNNNNNNNNNNNNNNNNNNNNNNNNNNNNNNNNNNNNNNNNNNNNNNAATGAAATTTGATATTAAATAAAAAAATCATAAAAAGTATCAATGTGGTTCAGATTAGAGCTGGATTATCTGAAGGTAAAAGAAG	6821:19:+
smaw_01_7813314	C01	7813314	305	+	T	C	GGTATTCTCTTCCATATCTGGGCTTAGCTGGTGGTGTCGCTGCTTTAGCAAAGAAACCGCATGAATACATTATTTGAAGAGGCACNNNNNNNNNNNNNNNNNNNNNNNNNNNNNNNNNNNNNNNNNNNNNNNNNNNNNNNNNNNNNNNNNNNNNNNNNNNNNNNNNNNNNNNNNNNNNNNNNNNNNNNNNNNNNNNNNNNNNNNNNNNNNNNNNNNNNNNNNNNNNNNNNACAACATGCATTTTTAGATGTGGCCACAAGGGGTGTCAGTAATCCCCCTGAATTGATACAAATTGCGCCTCTGATTACTTCCCCA	6834:305:+
smaw_01_7829807	C01	7829807	84	+	T	C	ATAGCTGAGCGCTTTCATTTGCAGCCGAAATACAGCCCAAGGAAAATGGGAAACCTTTGGTGTAAGGAGTCTCTTTTCTCCCCTCNNNNNNNNNNNNNNNNNNNNNNNNNNNNNNNNNNNNNNNNNNNCGCTGAGCTGAGCTCGCAGAGACGCGTCCCCCCACCCTCCCCCTCTTAAAGGAAAGAAAAAAAGGAGAAGCCATATCTCACTTTTC	6852:84:+
smaw_01_7850022	C01	7850022	184	-	G	A	GTGTCGAGGACGCTCTCGTATCTGTATTGTTCCGAAGGGGGTTTGCGTTGGACCCTTTGTGGGAAAGAGAACTGGGATCCTCCACNNNNNNNNNNNNNNNNNNNNNNNNNNNNNNNNNNNNNNNNNNNNNNNNNNTAAAGATTGCGTGCGCTGTCCTTCGTTTGCCAGTAATGGTTCAGGAGTCGGTCCTAATGATCAGAGATTTAATTTAGCTGCGATGGTGCAACTCGTGCCGGCTTCTGGAGACCTGGGGATCAACACAATGCCTCAGTCTC	6875:184:-
smaw_01_7874515	C01	7874515	255	-	A	T	AAATACGTTGGCGTTGACTTATTTTCAACAGACATCCATGTGTTTTGTCCGTGCTGCACGTCCATATGCAGTGCACTCAATATTTNNNNNNNNNNNNNNNNNNNNNACCGCTGTCCTTTTTGTGCGTTTGTTGGTAGATTTCCACGAAACCTGGTGTAACGGGACATGGGGCAAGAAAGCACCTGTTCAATTTTGGGGCTCATCCAGGAATTTTTCATCACTTTCTTTTAGATTGCGAGAATTCGTTTTTTTTATTTT	6893:255:-
smaw_01_7903177	C01	7903177	323	+	T	A	TGAGGCACTTTGCTGTGACAGTGAGCGGTGCTCCGTAAGCACTTAGCAACCGCAGGTCCCATGGACATCCACCTCCTCCAAAAACNNNNNNNNNNNNNNNNNNNNNNNNNNNNNNNNNNNNNNNNGCCGATGTCTCTTCTAATGCGTGGTGATAGACGGACTGACAGTCTCAGTGGCGGTAGCGCCCTTGTTCCCATACTCTTTCTTCGTNNNNNNNNNNNNNNNNNNNNNNNNNNNNNNNNNNNNNNNNNNNNNNNNNNNNNNGCTGTGACACATGTGGAGTGTATCTGTCACAGGACAAAAAAGGCAATCTGTCCAGCCATCCGCCCCAATATGGAGGCATTTCTTCNNNNNCTTGTCACCGGCGCAAAGAGGGTCGTGATCAGGGAAGCTGTCGCC…	6916:323:+
smaw_01_7910151	C01	7910151	57	+	G	T	AGAAATCAATGCGGAAACCTCGAACAGCAACATGTTCCTTGAATACACCTGAGTCGGTGGAGAAATAACAAGCGGCCACAAATGGNNNNNNNNNNNNNNNNNNNNNNNNNNNNNNNNNATATCATGAGAGGGAGCGGAGACGGAGGCGAGCTATTCCACGTGCAGCAGAATAAGGAGCGCTGGCAGACAAAACATTCGCGTATA	6923:57:+
smaw_01_7952681	C01	7952681	7	+	G	A	GAAGGTGGAACTCAAAACAGCAATATGCAATGAATCCTCTAATTGCTCAATTTTTTAGCAGCAGCATGCACCGATACGAGCGTGTNNNNNNNNGGCTGGGGGAAAGCAAAGGCGTTTGTTTAGATTCAGGGGCTTCGGAGGCCGTGCATGTTAATTACCGCCTGTTTTTCGCGGCCCCAAACAATCAGTGAACGCACAAATACGGGGTCGGAGAGGACGACACTCAGGGAGACGGCGGTGACGCAGACAAATGATGGGAAAAACGGGGAGAAGGAGATAGAGGT	6950:7:+
smaw_01_7960225	C01	7960225	148	-	G	C	AAAAATAGATCAACAGACCTGAGCATTCAGCTCTTTTTCTTTTTTTTCTCTCATGCTTCTCTCTTTCACATAGATCTCACCCAGGNNNNNNNNNNNNNNNNNNNNNNNNNNNNNNNNNNNNNNTCTGCCCGAGCGAGTGTTAGTTGCCCGCGTTCCTCGCGTGCGAGCTTAGACACGCACGTTGAGAGCACACGTGGGCTGGTGGATG	6958:148:-
smaw_01_7997323	C01	7997323	61	+	T	C	CCTCCAAAACACTTTCCCCATTTTGCACTCCCCAACCCTCCATAACCGCCCGCACCGTGCTTCACAGACACCAACAGGGGACACANNNNNNNNNNTCGCCATCGCATCTCAGGGAGACCATTTAGGGGCCTACTACAACGGCCTCCTATCTCGCCATCAGACCCCATAAAAGCATCAAACTCTAAATTGTGCCCGGAACACAGAGGGGA	6988:61:+
smaw_01_8004304	C01	8004304	71	+	G	A	CACAGGACCTTGAGTGTCGGCGCCATGCTTTTGCCTAATTTTGCTTCATTTGGGATAATGTGACAACCGCGAGCTCCGATGTGTTNNNNNNNNNNNNNNNNNNNNNNNNNNNNNNNNNNNNNNNNNNNNNNNNNNNNNNNNNNNNNNNNNNNNNNNNNNNNNNNNNNNNNNATAAAACCACGCAAGTTCGCTCCCAGCATCTGTTCTCGAACATGGCTCCCGCCAAAGCCATCAGCGCAGAGGAGGAAATTTGCTTGT	6996:71:+
smaw_01_8084618	C01	8084618	70	-	T	G	GAATCCAAAATCTGATCCCCATGGTTCTCCACCATCTTTATCTGGAGCAGCCGCCTGGAGACCACTTGGAGATGTAACACTGACCNTGAACCATGCAACTAAGAGGGGAAACCAAACAGAGCCTTCCAGAGCCCATGGTCCACGTCGTTTTCACAGCTACGTCACTTGGTG	7064:70:-
smaw_01_8151707	C01	8151707	146	+	T	A	TCCAGACGTATCCAGTCCAATATTTGTTGCAGTGTTCCCCACAGACCCCATTCCCTCTGTGGCGTTAACGGCCAGAGTTAGGTCTNNNNNNNNNNNNNNNNNNNNNNNNNNNNNNNNNNNTACGGCAGCACACCCCAGGTGGAATTGAGGGCATGCAGGCTTGTTCCCTTGACCCCAGGCCTCGTAATCCAGCGGCCGACCGTCCACCC	7123:146:+
smaw_01_8163911	C01	8163911	232	-	T	A	TTAATTCCTCGAAATCGAACGTTTCATCGCTCTGATCAGAGGGAACCCGAAGAAATGCTGGAGGACGACTCGTTCCATTTGACTCNNNNNNNNNNNNNNNNNNNNNNNNNNNNNNNNNNNNNNNNNNNNNNNNNNNNNNNNNNNNNNNNNNNNNNNNNNNNNNNNNNNNNNNNNNNTTCGGACTGGACGCCGTTCCGTCGCCGCAGCTCTTTCAAAGCGGAAGAAAAAATTAAAAAATTTCAATAACTTGGCCGTGGGTTGA	7136:232:-
smaw_01_8166566	C01	8166566	273	+	G	T	AGGACACGAGTTATGACACGTTACGTCTGAGAGAAAATCACAAACGAAATAAATGTGAGCACTCCCAAACACGAGTGATGGCGGGNNNNNNNNNNNNNNNNNNNNNNNNNNNNNNNNNNNNNNNNNAAGACTCTTTCAAAGTCATATTTGAACGCGCGGCGTGTACGTAAAAAGGCGCCGTCTCGCCTTTTCGTTTTCTAGCAACTTGCGTTTGGACATCTTTTCGCGAGCACAAGACGGAAAAGAAAGGTTGTGACTACAAGATCAGTCGTGCTGGAAACTCGAGCGATTTCTGT	7139:273:+
smaw_01_8171138	C01	8171138	167	-	C	G	AGCGAAGAAAAACAAACGCTAAACAAACCTTTCACCGAGCCGTCACTGACACGTCTCAATACCCACTACAGTCCTGATTTAATGANNNNNNNNNNNNNNNNNNNNNNNNNNNNNNNNNNNNNNNNNNNNNNNNNNNNNNNNNACACTCGGGAGTTGATGGAAATCTGTCAAGGGGATGCACCTTTGTCCTCGCAACATATACACACACACGTGCGCTTGTTTTTTTCT	7152:167:-
smaw_01_8215399	C01	8215399	127	-	G	A	AATGTACTACAGAGCTGTTGCCCATGAATTGAATGTTCATTTCTCTACCATAAGCCGCCTCCAAAGGCGTTTAAGAGAATTTGGCNNNNNNNCCAACGAGCCTCACAACCGCAGACCACGTGTAACCACACCAGCCCAGGACCTCCACATCCAGCATCTTCACCTCCAACATCGTCT	7173:127:-
smaw_01_8233445	C01	8233445	55	+	T	G	CTTCATGAGCCATTCCAACTTTATTGGCTCGGCTTAGTCATGACGTGTTTTTTGTTTTTTTTCGGAGGAAGAATGCAAGAGGTAGNNNNNNNNNNNNNNNNNNNNNNNNNNNNNNNNNNNNNNNNNNNNNNCACCCCCCCGTCGAAAGCGGAGCGTGGTTCGAGTCCAAGCTCGGCTGTGTGTGAAAGGTATGCTAACCAATTTCACAGTGTAAATA	7186:55:+
smaw_01_8234487	C01	8234487	151	-	T	C	TTTTCAAAAGAGCAGGCCCACCCTCTCCGAATTCATTTGACACAAGCAGTTCAGGAAAAACAACAGATTTCTCGCTGTCATGCACNNNNNNNNNNNNNNNNNNNNNNTTCACCAGAGGACCTGCAATGTTTTGGAGGAGGCATGTGAGATATGGAATCAGAACAGATGTCCAGCCCCCAAAGCCAAAAGGGCC	7188:151:-
smaw_01_8266566	C01	8266566	44	+	A	T	GCGCAGCCCAGAAGCGAACGGTTTTCAAGCAGCGGGCCTCTTCATTAGAGGACAAGACAAGCTACTCCCAGAGGGTCCAGAGCTANNNNNNNNNNNNNNNNNNNNNNNNNNNNNNNNNNNNNNNNNNNNNNNNNNNNNNNNNNNNNNNNNNNNNNNNNNNNNNNNNNNNNNNNNNNNNNNNNNNNNNNNNNNNNNNNNNNNNNNNNNNNNNNNNTCCTCCCCAAGTGGTTAAAAAGTTGGAGGCGAGGGAGAGAGCCCTGGAGGAGGGAAAAGTTGGAGAGAGGGAAGGGCGCAGCAGTCAGCAGATT	7209:44:+
smaw_01_8276847	C01	8276847	190	-	A	G	TCCGTGACTGTTGTTTTTTTGGCCATTCTCTCCAGGAACTCCTCATGACACCTTCACACAACCGTTGAGGAAAAACGACAGAGCANNNNNNNNNNNNNNNNNNNNNNNNNNNNNNNNNNNNNNNNNNNNNNNNNNNNTGAGCAAAAAAACTCCCACACATCCCATCCTCTAGCTAATTCCACTCGTCGGTGATGAGTCAGAGAGAAAAAGCCGTGCTGCGCCT	7218:190:-
smaw_01_8303977	C01	8303977	28	+	C	A	CAACTACTTGACAACACATTCGTGAATCGGAGACATATGTTCCGCGCAACTCCAGTCAGTCTTCTCGGCCATAATGGATTCAGATNNNNNNNNNNNNNNNNNNNNNNNNNACATAGACTCCAGCAAGAGCCCGCTGATCAGCGCCATCATGTTCGCGGCGGGCATCTTCGGCAACGTGGCTGCCCTGGTGATCCTGGAAGTCCAGCGGCGCCGAGAGANNNNNNNNNNNNNNNNNNNNNNNNNNNNNNNNNNNNNNNNNNNNNNNNNNNNNNNNNNNNNNNNNNNNNNNNNNNNNNNNNNNNNNNNNNNNNNNNNNNNNNNNNNNNNNNNNNNNNNNNNNNNNNNNNNNNNNNNNNNNNNNNNNNNNNNNNNNNNNNNNNNNNNNNNNNNNNGTGTCAG…	7237:28:+
smaw_01_8317725	C01	8317725	51	-	G	C	GTTGGCATTTCCACCTTGGAGGACACACTCCCATCCCTCCAAGCTGCCTGCGTTCTCCTCTGCTGAGGAGCTGCTCACTCACATCNNNNNNNNNNNNNNNNNNNNNNNNNNNNNNNNNNNNNNNNNNNNNNNNNNNNNNNNNNNNNNNNNNNNNNNNNNNNNNNNNNNNNNNNNNNNNNNNNNNNNNNNNNNNNNNNNNNCAGGTTACACGACTAACGCATCCATCCTGCGAACTGCACATCATACAGTGTTATTGATTACATGATCAGCATCTCCGATGGAAAACATTAAAAGTGTCCGGTGGCAAAATAGCACAAAGCAGGACACCAT	7245:51:-
smaw_01_8334592	C01	8334592	124	-	A	G	ACGCCCACCGACGTGGTGCGAGGGCGGGATCATCACTGCTTGCAAGAGTTAATTGAATATTTGCATCACATTTGACTGAGATAATNCTGATAATAACATAATTATGGGGACAATTTTACAGCATAGTTTTCTCTATCTCGTACCTTTCTCTGCGTCCAGCTCTGTTTCGGTGTCAATGTTCTACCGGAACGACAGCACAGTGGCTCCGTAC	7252:124:-
smaw_01_8335596	C01	8335596	231	-	C	A	GAGGTATGTCTGTGTGTTGCTTAGTGAAATTCAAAGCATTACTTGATTGTGTAAATAAGACCTGCGGATCGTCTTTCAGGTATGCNNNNNNNNNNNNNNNNNAAGGATCTTTCCAAGATGGCTGTCCCAGACCCGTCACAGCGACTCAAACAGATGGTGCTCTCAGCGGTGAGCAGGTTACAATATGAACATGAGCAAGCCGAGCAAGCCAAGCAAGCTGTTATCAGTTTGCAGTGTTTTTGTGGCAAGCT	7253:231:-
smaw_01_8362401	C01	8362401	44	-	C	T	AAAAGTGACTTGCTTCGTCGTGAAAACAATTAAAATGGCCTATGCCAAATAGAATCTGTAATAAAATATCAGCTGTCACATGCATNNNNNNNNNNNNNNNNNNNNNNNNNNNNNNNNNNNNNNNNNNNNNNNNNNNNNNNNNNNNNNNNNNNNNNNNNNNCAGTGTTTCTCACATTTCTAAAATGTTTGTAACTGTCTTGCCCAAGAAACACTTCGGCACACGGACTGGAAGACCAGGGGCTCGA	7262:44:-
smaw_01_8392480	C01	8392480	265	+	G	C	GAAATTCAGAAGCCAGTGTCGCTGACACCTTCCTCCACGATGTCAAGTGTATGAATCTTAATTTTCAAATGTATTTATTTGCCTCNNNNNNNNNNNNNNNNNNNNNNNNNNNNNNNNNNNNNNNNNNNNNNNNNNNNNNNNNNNNNNNNNNNNNNNNNNNNNNNNNNNNNNNNNNNNNNNNNNNNNNNNNNNNNNNNNNNNNNNNNNNNNNNNNNNNNNNNNNNNNNNNNNAGATGTAACACCTAAAAGGGGCCGAAACACTGTGCGTACGAGGCTGGGGCTGAGATTGGCCCTGGTGGAAGCAGCTTGTTGTCTTTC	7275:265:+
smaw_01_8423659	C01	8423659	275	-	T	A	CTTGGCTTCAGCAAAGAGAAGCGTCAGATATAGCATCTTGTGAAAGGGGCTATTTTTATCATTTTCAAGTCTCAGAGTCTCAGTCNNNNNNNNNNNNNNNNNNNNNNNNNNNNNNNNNNNNNNNNNNNNNNNNNNNNNNNNNNNNNNNNNNNNNNNNNNNNNNNNNNNNNNNNNNNNNNNNNNNNNNNNNNNNNNNNNNNNNNCTCACCCTGTCCCTCCACCTTTTCTCTCTCCAGGTCAGTTTTGAGGCCCTGTTCCGTTCGTTCGAGCCAGAAGTGCAGTTCCAGTACTTCAGGTCTTTCCGGCGGGTCAGGA	7289:275:-
smaw_01_8445201	C01	8445201	218	-	A	G	TTTACACTTGTTAAAATATGTCACTCATTAACGATGCAACAGTAGAAAAACAAAACAATCCCCTGTGAAAGGTTTCATGGGATACNNNAAGTTCAGCTCTGTTGGTTATTCACCTCCTTGTACTTCTGTTTCTGTTGCTGCTGTGGCTGAAGCACCCCCCTGCCGAGGGAGGCGTGAAGTCGACCACGGCGTCCCCAGCGGCAGCAGTCGACAGCACTGCATCCAGGGCCAGCGCGGACGCCATCG	7302:218:-
smaw_01_8460884	C01	8460884	61	-	G	A	GAGGATGCAACGCAGTCATGTCAACATGGAGCAGAACCTTAGCTGGGAAGTTCCCAACATCTTGTGGAGTCCATGACGCGAAGAANTGAGGCTTCCAGAGAAAAGGGAAGAACTGCCAAATCCAGACGGACTGGCAGAAAGCTGAAGGGGCCGATGGGGATACGTTTGTGACTTGCAAACAACTCGCTGCCTTTCCTCTATATCATCATCATATCTCTTACTGACAGTCTGTGCAGCTTCATTAGCATATCTAATTCATACATCGCTCACATAAACTGATGAGTA	7309:61:-
smaw_01_8469021	C01	8469021	3	+	G	T	AGGTAGCGGACTGTGGCTTCACAGGCTGCTGGGCACGGCAGCGTTTGGTAAAGGTTTCCTCAGGAGCACCTTTCACACTACTGACNNNNNNNNNNNNNNNNNNNNNNNNNNNNNNNNNNNNNNNNNNNNNNNNNNNNNNNNNNNNNNNNNNNNNNNNNNNNNNNNNNNNNNNNNNNNNNNNNNNNNNNNNNNNNNNNNNNNNNNACTCAGGTGTTTCATCCAGAAACAAACAAGTGCGAGACTTCACAATGACTTGGTCGCGACGTCGGCTCTCACTGGTCGGATGTACGTGTTAATATCACCGGGAGC	7314:3:+
smaw_01_8505604	C01	8505604	81	-	A	C	ACGGGCCAACTGGCACAGACACATGCACACACGCGCGCATGCTTTTTGCTCGCATTTAGGTAGAAACCAAGCAGAAAATGTGGTGNNNNNNNNNNNNNNNNNNNNNNNNNNNNNNNNNNNNNNNNNNNNNNNNNNNNNNNNNNNNNNNNNNNNNNNNNNNNNNNNNNNNNNNNNNNNNNNNNNNNNNNNNNNNNNNNNNNNNNNNNNNNNNNNNNNNNNNNNNNNNNNNNNNTGTACTATAAATGCGCTGGTTTGAGTTTTGTGATAGTATTATGGTTGAGGTTTACACACATTTATCACTTTGAGGGGGGGATACATTTAGTCTCCACCCGGGATAAAAAATAATTCAGCAGAGGTG	7328:81:-
smaw_01_8553981	C01	8553981	264	-	C	T	TGTGTACCTGTGATCTCCAGGCTGCTGATATTCTGGTACGTAGAACCAACCTGGCTTTTCACGTTCACACTGCGGGCCTGAAAACNNNNNNNNNNNNNNNNNNNNNNNNNNNNNNNNNNNNNNNNNNNNNNNNNNNNNNNNNNNNNNNNNNNNNNNNNNNNNNNNNNNNNNNNNNNNNNNNNNNNNNNCATGGGCGCCAGCAGCGTCGGCGGAAGCCCTGCCTGGGAACCCGCCGCGGCCACCACACTCTTACAGTTGATGAGGAAGTTGATGA	7366:264:-
smaw_01_8595436	C01	8595436	172	-	A	C	TGACGATATTGGCACTGAGGAGATGTCACATGTGACACTGCACCTGCGAGCATCGCACAGAAATATCAATAGCTCCTAATCATCTNNNNNNNNNNNNNNNNNNNNNNNNNNNNNNNNNNNNNNNNNNNNNNNNNNNNNNNNNNNNNNNNNNNNNNNNNNTTGTTATTTTCATTTTTTTTTTATAGATTTGATGGTGATTATATCTGTCAGGATGAGAGCTGATGAAATCTCTACCGTATGTGAAA	7404:172:-
smaw_01_8599540	C01	8599540	255	-	C	A	GAGCGGAAGTACAGTTGCGCAGGGTGTGTGCGATGCTACACTGCCCTGCTGTGACTCTTATTGAAACACTGTCATCCTGCAAGCGNNNNNNNNNNNNNNNNNNNNNNNNNNNNNNNNNNNNNNNNNNNNNNNNNNNNNNNNNNNNNNNNNNNNNNNNNNNNNNNNNNNNNNNNNNAGTGACTCACAGCGGCTGACGAAACCCTCTGATCAGAGCTTCTGCGTTACCTCAACAGCCCCTGTTCATTAAAAAACATGTTTCC	7408:255:-
smaw_01_8599983	C01	8599983	181	+	C	T	TGTGGTGCTTCCGTGTGTGGCGACCGTAGACTGTGTGACAGTTGCACATGGCTGCCGCGTGATCTCGCCGACCGTCTGCGACCCCNNNNNNNNNNNNNNNNNNNNNNNNNNNNNNNNNNNNNNNNNNNCTCTGAGCAACCTCTTCACAAATCCAAACAGCATTTATTTGAGCCGTGAATTCAGTAGCAGGTTGAGTTTTTCAGTCCTTGAAGAGTGGT	7409:181:+
smaw_01_8611682	C01	8611682	174	-	T	C	AGCACGATCAATACGCCCGAGCATCAAGGCACTTTGTGTCTGAGCAACAGAAGAAGAAGAAGAAGAAGAAGAAGAAAACAAAGTTNNNNNNNNNNNNNNNNNNNNNNNNNNNNNNNNNNNNNNNNNNNAACACAGTGGTGATGGGCAGATTCCTCCGTGATGAAGGCCGCACCACGTGCCAACCCTTCGTCTGTGGCCTCTGTGATGTTTTGGCGACGTTTCCATCCGGTTCCCATGGAGCACTGCGAGTGTGCACGTGTGATACACTGCT	7421:174:-
smaw_01_8649100	C01	8649100	54	+	T	C	TTGAATGCGACTTCCTACTGATGGATGATTAAGTGGCAGACGGGCCACTGTTTTTTTTTCTTCCCTTTTTTTAGAGTTCCGTCAGNNNNNNNNNNNNNNNNNNNNNNNNNNNNNNNNNNNNNNNNNNNNNNNNNNNNNNNNNNNNNNNNNNNNNNNNNNNNNGAGGAGCCCAACGAGGGGCGATTTATGAAACTTTAATACCCCTGTCATAATGAGGGGGCAGCGTCGATATGAGGGCGTCAGGGAGA	7451:54:+
smaw_01_8681290	C01	8681290	225	+	C	T	CGCGATGCAAATGATACTTACCTGCCCTGCCACTGCTCAATGTGCCAGTGCCAGTGTGAAAGTTAGAAAAGCCAGGACAAGTCAANNNNNNNNNNNNNNNNNNNNNNNNNNNNNNNNNNNNNNNNNNNNNNNNNNNNNNNNNNNNNNNNNNNNNNNNNNNNNNNNNNNNNNNNNNNNNNNNNNNNNNNNNNNNNNNNNNGGGAATTCAGGGTACAGTCTGGATCCCCCTCCATTGGGAAGTGCTTTCCCACGGGCAAAATCGTCAATCACAATCACGACCGATTA	7468:225:+
smaw_01_8708131	C01	8708131	80	+	C	T	CAGACACAGCTGGTTGTTGCTCGCCGTTCCCCGTCACTGTCAGCGGGCGACATGAGCTCCATGTAGAGTTGTGTTAACACGGCATNNNNACACAGACGCTGAGGAGCTGCCAGCGACGTGCCAGCCATGAGATGGAACAACACATACACACACACAAACACACACACACACACACACACACACACACACGGTGAACAACAAAGGCGCTGTCAGAGTCCCCCATGGGGCTTCAATTCCATTCAGGACCCAATAACGG	7484:80:+
smaw_01_8722328	C01	8722328	22	+	T	C	TCTTCCAGGCGGTCGTGCCCGTCTGCCGCCTAATGTGCTTTCAGACAGTTAGTCGGTGAGTGGCCTCTGATTTCCGTCCCGTGGANNCTCGGGGTCTTAACAGAATTGTATTGCCTTGTCTGTCCAGTGTCGAGGCCCAAAGTGATTGTCCTTCTAATGAAGAACAGTCGAGAGAGCAATCTAACCGGGGAGCGGGACAGCACTGCCCCGCGCCCCCGATATCCAATTTGCACTGGATTCATCTTAATGCAGTA	7487:22:+
smaw_01_8722893	C01	8722893	289	-	G	A	CACCGCGCAACAGCGATAGTTCAACATGCCGCCTACACAAACACGATCAACACAAGATGGAAATACAATCCAAGTAAATACATAANNNNNNNNNNNNNNNNNNNNNNNNNNNNNNNNNNNNNNNNNNNNNNNNNNNNNNNNNNNNNNNNNNNNNNNNNNNNNNNNNNNNNNNNNNNNNNNNNNNNNNNNNNNNNNNNNNNNNNNNNNNNNNNNNNNNNNNNNNNNNNNNNNNNNNNNNNNNTGCTCGTTTTCCCCGTCATTGTCTCGCGGCCTGCTCCCTCGACGTGACGACCTTGGCCCTCGTGTGGCCCACCTGAGGTCACTCT	7488:289:-
smaw_01_8725760	C01	8725760	75	+	G	A	TGACCAGATGTGTCCCTCGCTTTCATCCCTCTCTCTCTCTTTTAGCGGGCCCACGTTGAATTTTGCCTCGCAGCGTAAATATCAGNNNNNNNNNNNNNNNNNNNNNNNNNNNNNNNNNNNNNNNNNNNNNNNNNNNNNNNNNNNNNNNNNNNNNNNNNNNNNNNNNNNNNNNNNNNNNNNNNNNNNNNNNCATAAAAGCCCAAACTTTGCCCCCGTTTTTTTAATTTGTGCGTCTTTTCTTGGCTTCAAACGAGGCCGTGAGTGCTGGAGCTGCT	7492:75:+
smaw_01_8735262	C01	8735262	171	+	C	G	GCTCACCGATACGAATCCCATTCCCTCCAACGGCACTTTGATCCTGGGCAAACCCAAAATCCAGTTTGTACCGTAGCAAGATAATNNNNNNNNNNNNNNNNNNNNNNNNNNNNNNNNNNNNNNNNNNNNNNNNNNNNNNNNNNNNNNNNNNNNNNNNNNNNNNNNNNNTGCTCGGCTGCAATGTGGGATAAGAGATGGAGGGGCCCCCAAATGAGGTCCTCAACCCCTGCATCTTGAATTATGCAGTAATCTCT	7506:171:+
smaw_01_8741180	C01	8741180	233	+	C	A	TTTGCGACAACATTCTCTGCATTTCACACTGGTGATCATCTATGGTGATCATTGGGGTATCAACTATGCAGTGCTCAGGCCGCAGNNNNNNNNNNNNGCAATGATACAGTCATTCGCAGTCCTCATCCTGATGTGGCGACACATCGACAGCTGTTGCTCAGAGAAATGAAAAGGTTTTCCTGCAACAGACGTAAACGCGTGTGACCACACCAGAGTGACCCAAAATGTCCACCTTCATCCAACCAGCTGTTTTCCAG	7512:233:+
smaw_01_8751787	C01	8751787	28	+	C	T	TGGCTCCTTTGGGTGGCACGCGGTGCGCAGGGCATTGTTAATGAGCGGAGTGTCACGGACGCAGCCCGTACCCCGACAGCCGCCTNNNNNNNNNNNNNNNNNNNNNNNNNNNNNNNNNNNNNCATCCGCTCGCAGCACGTGGTCACTGCGAGCTGAATGTGAAAACAACTGGGTTCGCCGTGGACGTGGTTTAAAGGCGCAGTAAGAA	7521:28:+
smaw_01_8762485	C01	8762485	50	-	T	A	GCCCAAGGATGGTATGATACACACAGGATGGCATTGGCTAGGCTTTAGTATGACCATACATTGTTAAACTGTGTGCTTAGTTATGNNNNNNNNNNNNNNNNNNGAACTCAATTGAAGTTACAAATGGGACGAGCGCAGGAAGCGTCTTGTCCCGATGGCCTCGGCCCTCAGCATTGTGGAGGGGGCGAGGCTTCAAGGTCCCTCACTCAGGTCCTGTTTGAGCAGTGAAATCACAATCATACTTCAGTGGGAACTGTCAGACACAA	7530:50:-
smaw_01_8769782	C01	8769782	49	+	C	T	TTGCACACTCACGCTGTGTGCAGCATAAAATCCAATCATGTTGGCTCACAGAAGGACGGAGCGAAGCCAATAGCGCCTGACTTCTNNNNNNNNNNNNNNNNNNNNNNNNNNNNNNNNNNNNNNNNNNNNNNNNTGGTAAACGGACTAAATGAACTGTGTTTATATAGCGCTTCTCTGGTCTTATTGACCACTCAAAGTTCTTCACAGGACCTGTCCCATGCAAACACTGCCTGGAAGAGCGGTCAGAGGCAAGGGCGACCTACTCTACATCCTGAGCCACAGAT	7539:49:+
smaw_01_8771265	C01	8771265	31	+	C	T	GCAATAACCACGCGTGAGCACCAAAAGTAGCGACACATTGGTGTAATAATTGCACTAGTGGGGTTCCACAAAGATGGAAACTGTGNNNNNNNNNNNNNNNNNNNNNNNNNNNNNNNNNNNNNNNNNNNNNNNNNNNNNNNNNNNACACAGACCAGCACCTGACCTACGACTCACACCATCCACTGGAACACAAACTGGGAGTTATCGGAACTGTGCACGGCAGAGCTCAT	7542:31:+
smaw_01_8782484	C01	8782484	47	+	T	C	CTTCCTCAAACTCCAAATCAACCTCCACAAACAAGATACGGCAGCTTGTTTGTTGCACGCGAGGTAAAATGCAGGGCAACAAAGGNNNNNNNNNNNNNNNNNNNNNNNNNNNNNNNNNNNNNNNNNNNNGGATGTTACGGCCAGAGTGTCCAGCTGACAACCCTGAAACTTTCAGACAGAAACTGCGGTGATGAGTTAGTCCCACTTGCAGGTCGCTGCTCTGCGC	7554:47:+
smaw_01_8786561	C01	8786561	82	+	G	A	CGGGGTTAGCCCAAAGTAGTCCAACTGTGACATCAGAATGGGAGAGAAATGTGAACCAGTTGTTCAGAGCCAGGCTGTAGGGATTNNNNNNNNNNNNNNNNNNNNNNNNNNNNNNNNNNNNNNNNNNNNNNNNNNNNNNNNNNNNNNNNNNNNNNNNNNTGTGATTTTTTGCATAATATGTCACCTTTAAAAACAGCACGCGTAATAATGCCTCTTCGAAAACGACCCATCTAGCGGTTCAATCCCGAGGCCCTGACC	7555:82:+
smaw_01_8787177	C01	8787177	42	+	C	T	GCACAGGGCAGCATCCAACAACCGCCGACCAATCCCCAACTCCCCCGACGACACAACACAACACACACTCAGTCAAGAGTTATTGNNNNNNNNNNNNNNNNNNNNNNNNNNNNNNNNNNNNNNNNNNATGTTACTACGCTCCTTAGCACTTTAACTTCTTTCACTGGTTTACGTCAATTGTTCTGCAAAACACCCAGAGACGTCAGGGATTC	7557:42:+
smaw_01_8787491	C01	8787491	72	+	C	A	TAAAATGCTTGTGTTGAATAAATAGCAACACGGCTCCAAATATTAGTTCTGACAAACGAGCCAGTGCACAACATAATAAGTTGGCNNNNNNNNNNNNNNNNNNNNNNNNNNNNNNNNNNNNNNNNNNNNNNNNNNNNNNNNNNNNNNNNNNNNNNNNNNNNNNNNNNNNNNNNNNNNNNNNNNNNNNNNNNNNNNNNNNNNNNNNNNNNNNNGGATGATCAGGGATATTGAAAGGCTAGACGGAGACGCGCGACTCATCTCGCGTTCTGACGAGCCTCATCAGCTCCCGCCTCCCCTGT	7558:72:+
smaw_01_8787805	C01	8787805	251	-	G	T	GGATTAATTCACATCTAGTGCCGCGGTGCGTATTTAAGGCAGCGGGACAGTGGGACTGCATCAAAAATAATAACAATTCATGATGNNNNNNNNNNNNNNNNNNNNNNNNNNNNNNNNNNNNNNNNNNNNNNNNNNNNNNNNNNNNNNNNNNNNNNNNNNNNNNNNNNNNNNNNNNNNNNNNNNNNNNNNNNNNNNNNNNNNNNNNNNNNNNNNNNNNNNNNNNNNGCGACAGGTGATCGGGCAAACAACACTGCTATCCCTCTCTTGACATTCAAATCCTTTTTTGTTTTTCATTTGCACCCTCTCTCCA	7560:251:-
smaw_01_8813840	C01	8813840	222	-	G	T	GATTGACAGCTTTAAGTGGACAGAACCGAGTCAGCATATCTGATAATTGGCAAACTGTCAAAGAGGTGTGTGTGTGTGAGTGCCTNNNNNNNNNNNNNNNNNNNNNNNNNNNNNNNNNNNNNNNNNNNNNNNNNNNNNNNNNNNNNNNNNNNNNNNNNNNNNNNNNNNNNNNNNNNNNNNNNNNNNNNNNNNTGTATGTCTTGTCACTTCCTGGCGAGGAGCCTTAACTCATTTTAACATATTCATCATCTCCCTTGACCTTTCTTTTGGATGGCCTC	7573:222:-
smaw_01_8830791	C01	8830791	30	+	C	T	AGAGAGTGAAGGGAGCTCTAGAAAGGTCTCGCTTCCTTCAGCTCAAGGACATGATCTAGAAAGGTCAGCGGCTCAGAGGAAGCAGNNNNNNNNNNNNNNNNNNNNNNNNNNNNNNNNNNNNNNNNNNNNNNNNNNNNNNNNNNNNNNNNNNNNNNNNNNNNNNNNNNNNNNNNNNNNNNNNNNNNNNNNNNNNNNNNNNNNNNNTGAGGAGCTCCTGGAGGGGCTTCCGCAGCTCAACCAGGGAGAGAAAGCTGCTCTCGACGCTGACCTGACAATGGAGGAATTAACAACTGCTGTCAA	7592:30:+
smaw_01_8832368	C01	8832368	28	+	A	G	CTGCCAGCCTCCGAGCCAACCTCAGAGAAGCTGGATGTACCAAAGTAGGCCGTCTGATGAGGATGACGGCGACGTCAGTCAACACNNNNNNNNNNNNNNNNNNNNNNNNNNNNNNNNNNNNNNNNNNNNNNNNNNNNNNNNNNNNNNNNNNNNNNNNNNNNNNNNNNNNNNNNNNNNNNNNNNNNNNNNNNNNNNNNNNAGGTTTGTTCCTTTTCATTATTTATTTTGGGCCCAAAATACTGTGCCAAGAAAATGACTGTGCTCACAATTTTAAACATTTGGCTGATACGTAGGAACCGGGTCCAGAACGTGGGCAGT	7593:28:+
smaw_01_8891502	C01	8891502	56	+	G	A	ACAAGTTGTATTCACACATTCATACAGTGCAACTTAAGGCTCAAGTGTCTGGCCCGAGGACACTTCGGCAGGCTGACCAGGGGGANNNNNNNNNNNNNNNNNNNNNNNNNNNNNNNNNNNNNNNNNNNNNNNNNNNNNNNNNNNNNNNNNNNNNNNNNNNNNNNNNNNNNNNNNNNNNNNNNNNNNNNNNNNNNNNNNNGCCTCAAGAACGTGAATGTCATTTAAAATCACCCGTGCGCCTTTTAAAACAGCACTTTTCCCCGCTCACACTGTGCTCTGCTCTT	7654:56:+
smaw_01_8905246	C01	8905246	262	-	C	T	GAAAACGCACCACAGTGGCTTGCGTGCACATCGACATCATCCAGAGTGGACGGACACGTTTCCTACCCAAACAAAGATGAAGAATNNNNNNNNNNNNNNNNNNNNNNNNNNNNNNNNNNNNNNNNNNNNNNNNNNNNNNNNNNNNNNNNNNNNNNNNNNNNNNNNNNNNNNNNNNNNNNNNNNNNNNNNNNNNNNNNNNNNNNNNNNNNNNNNNNNNNNNNNNNNCAGTCTCAGCTCAGCGGGAGTGACGTGTCCGTCCCAGTTAGCGCTCCCCTCGCTGCCCATCATCTTTATATCCTCCACGTTGGCC	7668:262:-
smaw_01_8906794	C01	8906794	243	-	G	A	GGTGACCACGGCCAATATAAAATAAATTATAGTAGTAAAGAGTGACCGTGTCTTGTGCAGCGGTGTCACCAGAGAGAGACATCCGNNNNNNNNNNNNNNNNNNNNNNNNNNNNNNNNNNNNNATTCCACTGTCGATTACTCATTTCCAGCCGCACCAGAGCCGTCGCAGATTCCTTCATCGTGAATAAGTTAGCAGAGCGTCATATTATTCTTTGATGAACGCAGCATTAATCAAACACATACGAAGAATACAAAACCGGCGCGACGG	7671:243:-
smaw_01_8917775	C01	8917775	33	-	G	A	GCGGCGTTCATGAGACGAGTTGAGGCCAGAGTCGGAAGCGGGCGGCAGTCGAGCAACGTCAACTTGAGTGATTTTGCACTGGTTTNNNNNNNNNNNNNNNNNNNNNNNNNNNNNNNNNNNNNNNNNNNNNNNNNNNNNNNNNNNNNNNNNNNNACTGCTTGAAGCAAGCAAGCTGAACTTCATCACACAGTGCTACACAGTGAGTGAGTTACAGCCCACTTCGGGCCTGTGTGAGTGAGG	7679:33:-
smaw_01_8957606	C01	8957606	242	-	G	A	TGAGCTTCTACCCGTGTCGCAAAGTCGCAAAAAAAGTCCCCTCCCGCTTCCCCAAAAAATGCTGTGCAGTCACTGTCACTTCTCTNNNNNNNNNNNNCTTCGGTTTTTTCGAAATGATGCATGTTGTTGGTATTTTGACATTCAATGACGAAGTCCTCCGCTTTGCATTTGGTTGGTTTTTTTTTTACGCCTGCGTCATCCATCACTGTCATGGAAAGAGCAACATGTTGGCTGCTATCCCCCTCTGCATCCACCCTCTGTCT	7707:242:-
smaw_01_8978303	C01	8978303	183	-	T	C	GTGTGCAGGGGTGAAATCCTGTAGCCCTTAATAGGCTTATAGGATAATATCACTTTGTTTTCCACTCTCTCGTCCTTGCTCAGTGNNNNNNNNNNNNNNNNNNNNNNNNNNNNNNNNNNNNNNNNNTGGCGGCGGGGATGCAGGTGGTGATGATTCCCGACGATAACCTGGACCCCATCCTCACCCAGGAGGCCACGCTGCGACTCAGGAGCATGGAGGAGTTCCGGCCGGAG	7728:183:-
smaw_01_9031221	C01	9031221	204	-	A	G	CTCAAATCCGTGGGTGGGGAATTTCCAGAGCTTAGGGGTCGTGACCTTGGCCTTCGCCAAGCTGGGACTCAGGAGCAGCCGACAANNNNNNNNNNNNNNNNNNNNNNNNNNNNNNNNNNNNNNNNNNNNNNNNNNNNATACAACAATGGAGCCTGAAGTGCTTTATATAGGCCATCATTAAAATCATATCTGACATGTTCGTATGTGTAAATATCAGAGCGGGCGGGTTTTTGAACCGGGCTCC	7758:204:-
smaw_01_9034748	C01	9034748	36	+	C	T	GGTTGCGTTTGATTGTGAGAATCTAGGACGAAGCCCTCCTTGGACACGGCAGCTCCGTGAAATGGCGGGCCTGACGAGAAAGAGGNNNNNNNNNGTCATTACACACATCGTAATTAACAGCTGGAGCTGAATTAGGGTTTCCATATCTCTAGAATTCTCATTTTCTTGGGAGAGTTTAGATACAGAGAGCAGCGCAAATATTCCACANNNNNNNNNNNNNNNNNNNNNNNNNNNNNNNNNNNNNNNNNNNNNNNNNNNNNNNNNNNNNNNNNNNNNNNNNNNNNNNNNNNNNNNNNNNNNNNNNNNNGGCTTCTTAAATGATTTTGTTTAAGAAAAAAATACTCTCTTTCATGCCAGACATGTTATTGAAGGTCCAACGAGATAGGACATTC	7762:36:+
smaw_01_9039434	C01	9039434	277	-	A	C	AGCAATGTCCCACACTTTTTTATCGACCATCAGCCACAAATGCAAAAACACTAACAACACTGAGAGGGAACATAATTTCGTCTTCNNNNNNNNNNNNNNNNNNNNNNNNNNNNNNNNNNNNNNNNNNNNNNNNNNNNNNNNNNNNNNNNNNNNNNNNNNNNNNNNNNNNNNNNNNNNNNNNNNNNNNNNNNNNNNNNNNNNNNNNNNNNNNNNNNNNNNNNNNNNNNNNNNNNNNNNNNNACTCCATAATGACACATTATCTGCCACGGTCACAGTTTTAATCAGCCGTGGGCTGTGATGATATATAATTATGTATGGACTGGGC	7770:277:-
smaw_01_9042234	C01	9042234	200	+	T	G	ATTTTCCTGTACAGCGCTATTATTGTTTGTATTAAACACTTCACTCTGTGTTTGATACTGTGTTGACTGTGGGCCACCGCCCATTNNNNNNNNNNNNNNNNNNNNNNNNNNNNNNNNNNNNNNNNNNNNNNNNNNNNNNNNNNNNNNNNNNNNNNNNNNNNNNNNNNNNNNNNNNNNNNNNNTTTTGAGCGCGTGACCATGGTCGTTCCCTGAACCCAACCATTAGTGTAACCACGGCAACGAAAGCCCCGCGACCTCAACTAGTAC	7776:200:+
smaw_01_9092832	C01	9092832	9	+	T	C	TGTATTTCTGACATCCCGTGCACAGGGTGCGTGTCTTCGCGTCTCTTGCCCTCGGACACAGTTGGCACCGTTTTCTCTTTTCCGANNNNNNNNNNNNNNNNNNNNNNNNNNNNNNNNNNNNNNNNNNNNNNNNNNNNNCGTACACGGGCTCTGCGCGAGGTGCGTGTTCCCTACGCATTATGAGCGGTGTGAACAGGTCCTTGCCCAGCTGCTCTAAGAAAAGCCTCCTGCGATTTCGCTTCC	7798:9:+
smaw_01_9102217	C01	9102217	155	+	T	A	CAGACCCACTGAACATGCTGACACACAAAAGGACCACGGAATACCAGGAGTAAGCACTGATGAGCCGCTGGAGGAAACAGGGCCCNNNNNNNNNNNNNNNNNNNNNNNNNNNNNNNNNNNNNNNNNNNNNNNCTGATGAGCCGCTGGAGGAAACTGGGCCCAACACACGCTGACACACAAGAGGACCACGGAATACCAGGAGTAAGCACTGATGAGCCGCTGGA	7805:155:+
smaw_01_9110918	C01	9110918	282	-	C	T	TCGCTGGGCACCCCGTGCCCGCCGCTGAAGGCCTCCATACCCGCCGCCTCGTTCAGCGTCCCAGGCACCGAGACGGAGGATTCAANNNNNNNNNNNNNNNNNNNNNNNNNNNNNNNNNNNNNNNNNNNNNNNNNNNNNNNNNNNNNNNNNNNNNNNNNNNNNNNNNNNNNNNNNNNNNNNNNNNNNNNNNNNNNNNNNNNNNNNNNNNNNNNNNNNNNNNNNNNNNNNNNNNNNNNNNNNNNNNNNNNNNNNNNNNNNNNNNNNNNNTCGTACTCCGCTCCGTTGCGTGGGAAAGTGGCAGACTTGCAGCCCGACACCTGCTGCTCCTGAGCGCCGAAAAGCTCTGGGGCCTG	7813:282:-
smaw_01_9139841	C01	9139841	24	+	G	T	AGCTTCATTTGAACAGCCACAGCGTTGGGCTGCTCCTCTCCATTCCCGTAGCCGAACTGAAATTAGACGCCAAATTGACAGGATTNNNNNNNNNNNNNNNNNNNNNNNNNNNNNNNNNNNNNNNNNNNNNNNNNNNNNNNNNNNNNNNNNNNNNNNNNNNNNNNNNNNNNNNNNNNNNNNNNNNTATCCAAATTGAGCTATTGGCTTCTTACTCTGGTGCCACCGTTCATGTTGGCTCCAAACCAAACGGGTTTGCTGGCGCTGGGACTGGATTCCGTCCACCAGGCCTTGCT	7828:24:+
smaw_01_9185046	C01	9185046	228	+	T	A	TACACGGGAATGCTCGTACCAGAGGAGGGTTTGAAGTGTTTGACTTTTTTTTTTTCTTCTTTTTTCTGGGAATTGTGTGGAGAACNNNNNNNNNNNNNNNNNNNNNNNNNNNNNNNNNNNNNNNNNNNNNNNNNNNNNNNNNNNNNNNNNNNNNNNNNNNNNNGACGTCGAGGTGTTGCTTCATCTCTCATGTTTGTCAGTTTAAGAAGAATGGAAACAAGATGCCGTAAAAAATTCAAGCGTCTTTA	7874:228:+
smaw_01_9186273	C01	9186273	21	+	C	T	GTGAAGTAGCCTGAATTAGACGGATGAAGGAAGTGGAGTGAGAGCAGATCAGAAGTTTTGCTCTGTGTTTTTTTAAAAAGGGGCCNNNNNNNNNNNNNNNNNNNNNNNNNNNNNNNNNNNNNNNNNNNNNNNNNNNNNNNNNNNNNNNNNNNNNNNNNNNNNNNNNNNNNNNNNNNNNNNNNNNNNNNNNNNNNNNNNNNNNNNNNNNNNNNNNNNNNNNNNNNNNNNNNNNNCGGGGAACAAGGCCTTGACAACTTGGCCTACGAGTATGGGAGCCAGAGCGAGCTCTGCCCTCCGCCCAAAGCGGCCTCCAGGGTG	7875:21:+
smaw_01_9233034	C01	9233034	249	-	G	A	TCTGATTCAGGCCACCTCATCCTCAGACATGCCCCCATGAAGCCCGTGTGCCTCACTGGGCATGGCTCCCTTTTGTTGCAGCCGANNNNNNNNNNNNNNNNNNNNNNNNNNNNNNNNNNCGATGGTCACCCAGATTACGCCTCATCATACGGCCTATTTACACTTGACACCAAACAGAATGACAAAGAGTATCGCGCCACCGCTAACAAAAAAGCTGCGCTCGTTGAGGACGCCAGTCGTGTTCTTTTCGTCATATCATTTCAAGAAGTG	7937:249:-
smaw_01_9233352	C01	9233352	62	+	G	T	CTCGGGGGCGCACGTCTGTCCCAGGGGAGGGTCGAGCACCCCCAAAATCCAACGATTTATCGTCCTTGTCATTGCTGATGCCAATNNNNNNNNNNNNNNNNNNNNNNNNNNNNNNNNNNNNNNNNNNNNNNNNNNNNNNNNNNNNNNNNNNNNNNNNNNNNNNNNNNNNNNNNNNNNNNNNNNNNNNGTCAGTTGAGGAACTTTTTGGGGGCTTGATGCATCTCAAAGAAGTAGAGGTTAAACATATAACACACTTAAACGCACACGCTCAAAC	7939:62:+
smaw_01_9246652	C01	9246652	63	+	C	T	TGCGGGGCCAGGTGAGGTGCTGAGGTGGGTGGAGCTGATTGCTCGTGCGGCACCAAGGTGAGCTGACTGTGACAGAGATCCTCCANNNNNNNNNNNNAAGAACGGAGCCGACAGGTAAGTACAAAAACAGGAAACTAGACTTGATACACATCTCAAAGGCTGGCGGAATGGCATACTCAATGNNNNNNNNNNNNNNNNNNNNNNNNNNNNNNNNNNNNNNNNNNNNTCCGCACACTGTGGAACCTGAAGACGGAAACACAGAAGGACAAAACACATTCACACACACACACACACACACACCAGACTGTCAC	7949:63:+
smaw_01_9250328	C01	9250328	63	-	C	G	ACAGAAAGTACTGTAGCAGGGAAACGTGTTCAATCGTGTAAATGTTTCAAAAAATGTGTTCAGACGCCCACCGTGAGCCGCAAACNNNNNNNNNNNNNNNNNNNNNNNNNNNNNNNNNNNNNNNNNNNNNNNNNNNNNNNNNNNNNNNNNNNNNNNNNNTCAATTTTAACGACTTCTCATCCGCGTCGGCTTCAAACATGAAAACTACCGCTGACAACTGTGCAAACTCCAAACGCCGATTGAGAACGTTCCACAGCAGCTTGTGCTGTAAATGCGAGGATTTAACTTTCAATATCAAAAAGAATATTTTTTTAGACTCTTA	7961:63:-
smaw_01_9254660	C01	9254660	22	+	G	A	TGCTTTTAAACTTAGACCCTTGGCCAGTTCTTACGCCCACAGGATCAAGCAATAGACCAGAATGCATTGCAGCCGCATGACTGGTNNNNNNNNNACACAAATGTTGTCCTTTTTCTCTTTTGAAAAAAACAACAACAACCCACTCTTACCTTTCCTGCTCTTGCTATGCTGATTCATTCNNNNACGCCTACACGCGCGGTGGATGCATCGGGGTCCTTTAATGACTGTGACTGTGGAGCGGTCTTGGCAGACACAGCGTGTCGGGGGGGGGGATCTTGTTTGCCGGAGATAGAGCTCGACATTCACAGTCATACTC	7963:22:+
smaw_01_9260447	C01	9260447	14	+	A	C	CAAAAGCAAAAAAACCCCACCATTTGCTCGCTGAATACACCCTCGCAAGCCAGTTAAAGACAGGCGGGGAACGTTTCAAATACGCNNNNNNNNNNNNNNNNNNNNNNNNNNNNNNNNNNNNNNNNNNNNNNNNNNNNNNNNNNNNNNNNNNNNNNNNNNNNNNNNNNNNNGTTGTTGTGGATTCAGGTGCAGTCTGTCGGGCCACATGGTGACAGCCCGCCCAGCCGTGCCGTCCACTTCAGAACTCTGGAGAGAAGTGACCATTATNNNNNNNNNNNNNNNNNNNNNNNNNNNNNNNNNNNNNNNNNNNNNNNNNNNNNNNNNNNNNNNNNNNNNNNNNNNNNNNNNNNNNNNNNNNACACACACGTTACCGTACACGTTGGTGCCACTGGCATGATT…	7977:14:+
smaw_01_9285290	C01	9285290	240	-	C	T	TTTTGAGATTTTGTCTCATGGATGTTGGATCATTTTTTTTTATACATAAAGCGAATCATTCCGTTCTTCTTCCTCCCATGTCTCANNNNNNNNNNNNNNNNNNNNNNNNNNNNNNNNNNNNNNNNNNNNNNNNNNNNNNNNNNNNNNNNNNNNNNNNNNNNNAACTGCCAACACCACTCTTCAAGAATAGCTCATGGGCAGCGCAACTCGAATCCTGATGTTTGATTGTCTCCTTTTACGGATGAAAT	7993:240:-
smaw_01_9297359	C01	9297359	196	-	T	G	CATGGGTGTAGAGAGAGTAGAGAAGTGGGCTCAGCACACATCCCTGTGGAGAGCCTGTTCTGAGTGTACGGGTGGAGGAGAAGTGNNNNNNNNGTTTCACCTTCTGGGGGCGATCACTGAGAAAGTCACGGATCCAGGAGCGGGTGAGCGGATGGAGTCCCAGGTCAGACAGTTTTCTGACCAGGATGTTCCGAGAAGATTGTGTTGAAGGCTGAGCTGTAGTCAATGAAGAGCATCCT	8006:196:-
smaw_01_9312079	C01	9312079	170	-	C	G	GAAAGGTCACCAGAGAGGTCACGTAGGAAGGATAGGAAATGCCACCAGTTAGTGCCTTGCTTTGCATTGAGTTTAATAATCCTGGNNNNNNNNNNNNNNNNNNNNNNNNNNNNNNNNNNNNNNNNNNNNNNNNNNNNNNNNNNGTGCCCTGATGAGGGCACTCAGGAGGGTGCTGACGGGCGAGGACGCGTCTGGAAGAGCTTTGGGTTTGGACGGCAGGCGACCTCTT	8015:170:-
smaw_01_9343800	C01	9343800	182	-	A	G	GGCAGGAGCCGCTCTTCTCCAAGGACAGGAGCAGGTTTTTGCTCGCGCTGCCCGTGAAACAAGGAGGTCAGGGAGATTTCCACCANNNNNNNNNNNNNNNNNNNNNNNNNNNNNNNNNNNNNNNNNNNNNNNNNNNNNNNNNNNNNNNNNNNNNNNNNNNNNNNNNNNNNNNNNNNNNNNTTTACCAAGGATAGAGCTACTTTCTTGTGTTTCCGATCCTATCAACCGATTCTCTTTCAGGTGCGAAGCGACCAGGACGAAGTTC	8038:182:-
smaw_01_9345125	C01	9345125	3	+	C	T	CTCGACAGAGAAATCCCATCTTTGTTCGTCTCCCTCTCTCTGGCCCTCATCGGTTATTATTCTTGTTTGTGCACAGGCATTTGTCNNNNNNNNNNNNNNNNNNNNNNNNNNNTGTGGGTGAGGTTTTTTTTGTTTTGTTCAGAGGCACCCACCTGAAGACAGACCCCTAAGGTGGCGTCGCACACCGTCAGCAGAGA	8042:3:+
smaw_01_9353860	C01	9353860	243	-	A	G	TATTTCGTTTCTTTTTTCAAGAGACCGTCAGCTTCTGTCTCACAGCTGTTTTCTTTTGTGGAGGTGATCACACTCCGACGCAGCGNNNNNNNNNNNNNNNNNNNNNNNNNNNNNNNNNNNNNNNNNNNNNNNNNNNNNNNNNNNNNNNNNNNNNNNNNNNNNNNNNNAAAATGTTGCTGTGGACATTTAATGGCAAGCGATATTTGTGGTTTTAACGACTGCTTTCCTCAGCAGTTTTGTTTTATCCTGTTTTATCGTCATGTCCCGCGTCCGATTCGGACAATCGCCCGCTGCGCTTCGTCATTGTA	8048:243:-
smaw_01_9356412	C01	9356412	9	+	C	A	GGAGTGCACAGTGACATACAGTATTTATCAGTTTCCCCTATTCAGACTTCGTCTCCTCCGCTGAGCGCGTTTATCGATGCGGCTCNNNNCGACGTTCTGCCGCAACTGTCGGAGACCTCACCCATCAGTCAATCCGTCAGTCAGTGTGACGTCATTGACACCTCGGTGTCCGTTAATTGATTTTGCCCGTGTGGCGCCTGTTGCTTCGAACTACCGCCCTTTGGCCACCTTTTAACGATAAACATGACGGGCAGCAAAATCGCCGGCGTGACCGCAAAAGACCTCAAAGACCTGAGGAGGGGATTTAGGGAGCTTTCACACCT	8049:9:+
smaw_01_9378132	C01	9378132	143	+	C	T	TTAGTTGTGTGTTTCGTTTGGTTTGGGCAATTCAATTCATTGGACATTTGGGAACATGCACCACTGAAGAATCAATGTGGACTCCNNNNNNNNNNNNNNNNNNNNNNNNNNNNNNNNNNNNNNNNNNNNNNNNNNNATGGAGCGAACGCAGCCTCGCAGGCAGGTTCAGGAAATGGGTGAATTAAATGACAAAAACGTACAATCACAAAACAAAGGAAAAA	8063:143:+
smaw_01_9394706	C01	9394706	41	+	A	T	GTGAGACAATGAAAAGATTTGACCCTGGACTTGTGTGACGACCCCTAACCCTTAAAATGAAGGCTGCTGTCATTCAAAGTAACAANNNNNNNNNNNNNNNNNNNNNNNNNNNNNNNNNNNNNNNNNNNNNNNNNNNNNNNNNNNNNNNNNNNNNNNNNNNNNNNNNNNNNNNNNNNNNNNNNNNNNNNNNNNNNNNNNNNNNNNATCGTAAACACGGGTAGGTTAACCCTCTCCTCCTCGGGGAAGGCCTGAGGTTCATTGATCTGATTGATGAAAGGTTTGGCGGTGG	8081:41:+
smaw_01_9414486	C01	9414486	286	-	G	A	GTGATACCTCCCTTGCGTCTTTGCCTCTGGCAACTTCTTCTGCTTGTTCCATGTGGCCTGGTACTCAGCGAAGGTCCCAAGCCTCNNNNNNNNNNNNNNNNNNNNNNNNNNNNNNNNNNNNNNNNNNNNNNNNNNNNNNNNNNNNNNNNNNNNNNNNNNNNNNNNNNNNNNNNNNNNNNNNNNNNNNNNNNNNNNNNNNNCAAGGTCTATGTTCAAGTTTGTACCGTGACTTGACCTCAGCACAGGTCTGGAGAATGCAGGTTTGGCCTCAAAGAACCTCCTCCGCG	8094:286:-
smaw_01_9417008	C01	9417008	125	-	C	G	GATGCGGTCGGCGGCTTGTCGGTCAGTCTCAGCGGTGCAAACTGTGGCGACGGAGACCGCGCTCGATCCGCCGTGGGGAGAGGCANNNNNNNNNNNNNNNNNNNNNNNNNNGAAGAAGGAGGCGGCAGCTGCTCCTTCTCCTGCTCAGTCTGCACATCTCCCTCGCTCATGTCTGGTACGGATGTCCAGCTGAGGTGAGGGGAGCTGGCCGTGGCGGGTCCGGCAGAGGAGCCCTGGGTAGTGGCATGGTGCTGGGTGTCGGAGCTGCAGCTGGACAGAG	8099:125:-
smaw_01_9487934	C01	9487934	12	+	T	C	CACAAGGAGAATGGGCTCCGCACATCATCCATGTTACCAACAGTTTATGGCCACTGTGTAATGAGAGACCGCCTGATGAGGCCGTNNNNNNNNNNNNNNNNNNNNNNNNNNNNNNNNNNNNNNNNNNCCTCATCGGTGATCTGGATTGTGTAAGCTAGGCTAAGCGTGCTAGCTACATGCGAGAGGTGTCTTTACTACAGCTGGTGAGGTAACAGCAGTTACCGACGGAGGAGTCGAGCCTTCGTTGCCTCCGTCATCACGCAAATTAGCGCGTTCACCCGCATGTGACGTTCACATCAATGCCGATCGGAGGTGAA	8138:12:+
smaw_01_9509930	C01	9509930	172	+	A	C	CAGAAAGGAACCTTGGTGTCGCCGACAGTGTGCCTGAGAAAGGAAACTGCATTTAGATGCACTGACGCGCACCAAAGTCTTCAGANNNNNNNNNNNNNNNNNNNNNNNNNNNNNNNNNNNNNNNNNNNNNNNNNNNNNNNNNNNNNNNNNNNNNNNNNNNTGCAAGTCTTTAAGAGTTTACTACACATAAAAACAAAACGTGTGATTGAAGCGGTACCTCTGTCCATCGACGGTGCACAGGGCGA	8162:172:+
smaw_01_9517181	C01	9517181	307	-	A	C	GCTTTCTCTTTGGTATGCAGCATGCAGCAGCGCACAAGATTTTTTCCTCAGGAAAAACCCCAACCCTATTCGACACACGCACTAGNNNNNNNNNNNNNNNNNNNNNNNNNNNNNNNNNNNNNNNNNNNNNNNNNNNNNNNNNNNNNNNNNNNNNNNNNNNNNNNNNNNNNNNNNNNNNNNNNNNNNNNNNNNNNNNNNNNNNNNNNNNNNNNNNNNNNNNNNNNNNNNNNNNNNNNNNNNNNNNGCTGCCGCGCTGCCCAGCAGTTGTCAGGGCCGACAGGAGCAGATGAGTCAACTCGCGCACATTGATTTGTGCAGCGCCGCCTCTCAACGCTCTCTCCCCAGGTCTAAACGTCTGCCTCCACCCGGCATCAATTTGTCACGAGATGCCGCG	8171:307:-
smaw_01_9524104	C01	9524104	2	+	A	G	GAGGAGAGGCGATAATTCACAGACACCCACACCTTTTTCGAAAAGCAGTCGGCTTCCTGCTCCTTTTAAAAACGAGGGTGATGGGNNNNCTCGGCAGATCCCTCCCACGCTGCATAGCGGCTGGCTTCCACCCACCGCCCGTGGAGCCTCCCACATCGGAGCCGTTGCCACGGCAACACATCATCATCGTCGTCGTCAGTGACTTGCACTGGAGGAGTAGGAGGACAGGGAGGGGAGGGGCGGCCTGCTTGAGCGCCAAGCAGGGCTGCCACT	8177:2:+
smaw_01_9531342	C01	9531342	236	-	C	A	TACACTTGTCATTCCGATGCGATTCCCAGAAAATCGCATTCGGGAGAAGAAGAGATTTCATGGCTGCGTTCACACCGCCCGCCTTNNNNNNNNNNNNNNNNNNNNNNNNNNNNNNNNNNNNNNNNNNNNNNNNNNNNNNNNNNNNNNNNNNNNNNNNNTAATTCCTGAACATTTCGGCTCCAGTTTGGATAAAAAATTGACGTGTCAACTGCCAGTCTACTACCTCCGTTCCTTCGCAACGTT	8182:236:-
smaw_01_9536324	C01	9536324	242	-	G	T	GACTAAATGTTGTGTGTACATCGAGGTATAATATTGAGTTTATTAAGTTCGCAGGATAAATTGTGGAAAGTGTCACTACATGTTCNNNNNNNNNNNNNNNNNNNNNNNNNNNNNNNNNNNNNNNNNNNNNNNNNNNNNNNNNNNNNNNNNNNNNNNNNNNNNNNNNNNNNNNNCTTTTTACATTCGTTTTCGGATGTGTTGGACGTTGCGCGGCGCATGATGATCTTCCTCTCCTTTTGCGCGCGATTTTATTTTCCCGCACCGACTTTGCCGGTGACCATTTTCTCTTGTCACTGCTTTCGCTCTGGTTTGTT	8192:242:-
smaw_01_9567357	C01	9567357	75	-	G	A	GCCTTCACCTGGGCCTGGGCCGCGGCTGTGGAGCCATGGTGGGAGGAGTGTTCGTCAATTACTTTGGTACGACACAACAGTGGTTNNNNNNNNNNNNNNNNNNNNNNNNNNNNNNNNNNNNNNNNNNNNNNNNNNNNNNNNNNNNNNNNNNNNNNNNNNNGCAATTATAGTTTCACTGTTTGCTTTGCAGGTGCCGCAGCGACGTTCCGAGGAATTGGCATGGCCTCCCTCGTCATCCTCCTCATATTCTCCTTCA	8210:75:-
smaw_01_9569448	C01	9569448	213	-	A	G	TGTGTCAAGTTCAGATTCAGGTTTGTCTGCTCCGTTCTCAGCGTCAACTTCAGCCAGTTTGTCCTGGACTCCTTCAGTCGTTTTTNNNNNNNNNNNNNNNNNNNNNNNNNNNNNNNNNNNNNNNNNNNNNNNACAACCAAACTCATTGCCATGTGTTTTCACCTCATTTGATCTCTCATGAACTGATGCTCAAAAGTTTAAGTGTGTGTTTGTTTAAATCACTGGCAGCGGCAGAAAAGAGCAGCCTCTCGATACGGAGCA	8213:213:-
smaw_01_9572676	C01	9572676	185	+	G	A	ACTCGATGAAATATCGGATGCCGACGAGCAGCCCGCTGCGGCCGGCCGACATGCCCAGCTGCTTGTAGTACACGGCAAGCAGAGGNNNNNNNNNNNNNNNNNNNNNNNNNNNNNNNNNNNNNNNNNNNNNNNNNNNNNNCAGGTGGCTGTTGACGCGCAGGCACATCCTCTCGCAGCAACCTATGGTGTCGGGCTGCGGGGGGGCCATCTCGTCCGCGGCGGGC	8222:185:+
smaw_01_9595995	C01	9595995	82	-	G	A	GTCACCAGAAACACCAGCAGATATTGCAGCAGACTCAGATTCCGCCGTCTTGTTTGCCGCCGTGTCCCAGCCAGAGCTCTGCGCTNNNNNNNNNNNNNNTACTGGGCCTGTCGTCGCCGCAGCACAGCCTGCCGTCTTTAGAGGCCTACAGCATCTTCAGCGGTGCAGAGGATGCGGCTCATAGC	8238:82:-
smaw_01_9599800	C01	9599800	213	+	C	T	ACCTTCACAGCTTTTTTTCTGTTACTGTCTGTGACACAATGGAGGTGGATGTTGTACAGGACAACATGTTGTTTAGCACGTCAGANNNNNNNNNNNNNNNNNNNNNNNNNNNNNNNNNNNNNNNNNNNNNNNNNNNNNNNNNNNNNNNNNNNNNNNNNNNNNNNNNNNNNNNNNATCTGATCTAATCATGTGTTGCTGTACAGGCCAGAACTCGAGGACTGAGCTTGGAGCAGTGACGTGACACGAGCCTGCTGCTTCACTTACTGCACCTCACATCAGCAG	8242:213:+
smaw_01_9608927	C01	9608927	192	-	T	A	GCATACGTTAAGAATTAGTTATTGAATGCAGCCACTGTGTAAAAGTAAAAGTAAATGTACATTGTATTTATTTTTTTATGACCTGNNNNNNNNNNNNNNNNNNNNNNNNNNNNNNNNNNNNNNNNNNNNNNNNNNNNNNNNNNNNGCAGAATCAAAGATGTGTCGTTGTGGAGGGCGGCAGCAGCTTCCTGACTTCAGCTGCTCTATTCCATTACAGACAGCGGCCTATG	8254:192:-
smaw_01_9622120	C01	9622120	46	-	G	A	AGATCCTCGGGGATGGTAACGTCGTTGACTCCCTGGACATCGAGCCCGATGAGCTCAAGAGCTGGGAGACGACGCTGCTAAGGATNNNNNNNNNNNNNNNNNNNNNNNNNNNNNNCCTGAACGACATTCTCAGCAACGACATACTGTCTTTCGTGGAGGAGCAGCTCCAAAAGGAGGGTGGGCTCAAACTGCCAGATCAGCTGGACGNNNNNNNNNNNNNNNNNNNNNNNNNNNNNNNNNNNNNNNNNNNNNNNNNNNNNNNNNNNNNNNNNNNNNNNNNNNNNNNNNNNNNNNNNNNNNNNNNNNNNNNNNNNNNNNNNNNNNNNNNNNNNNNNNNNNNNNNNNNNNNNNNNNNNNNNNNNNNNNNNNNNNNNNNNNNNNNNNNCCCTCAGTTGAGTT…	8265:46:-
smaw_01_9627476	C01	9627476	32	+	G	T	GTTTAGTATCGGGGGTTTCGTGCAGCGTTGAGTTTTTTTTGCTTGTGATTGGCAGCGCGGCTCGTCCTTCATCCACCATCCTCTGNNNNNNNNNNNNNNNNNNNNNNNNNNNNNNNCCAAATGAGGCCCTCTTGATAGCTCCCATCTTCGGGATGTCTCACAGTCGTACCACGGCTTTACCGTGTAAAGCCATGTTGCATTA	8276:32:+
smaw_01_9649192	C01	9649192	242	-	A	T	AAAAGTAGTTGAAAATAAGAGGTGCACAAAGCAAGTGAAGGCTTAAAAATTCAGTTTTTCTTTTTAAATTTTAAAAATCTGTTGANNNNNNNNNNNNNNNNNNNNNNNNNNNNNNNNNNNNNNNNNNNNNNNNNNNNNNNNNNNNNNNNNNNNNNNNNNNNNNNNNNNNNTATTCACGTGAATATCTGTCTCCTCTTTCACGTGGAGGTCAGAGGTCAGAGGCTGGAGCTGTACGAGACTTTGCGTCTCGATTTA	8287:242:-
smaw_01_9655817	C01	9655817	252	-	A	C	GGCTTTCTGTCCTCTCGGTAAGCCAAGACAACTTTTGCACACACAGCGCAGTTAATAATGCTTTAAAGAAGACACTTGTGCATCANNNNNNNNNNNNNNNNNNNNNNNNNNNNNNNNNNNNNNNNNNNNNNNNNNNNNNNNNNNNNNNNNNNNNNNNNNNNNNNNNNTAATCAGGGGAAACCTGTAAAACACGTTGACTAATCTCTCCTCTGTGTCTTATAGGAAGTTGTGTTTGTCAGAGGAAGTCAGGGTGGGAGGAAGCGCCCGGGGCGAAGTTGTGGCAGAGAGAGAAAGGTGTCTGCTAACCTCTGAT	8293:252:-
smaw_01_9657642	C01	9657642	66	+	C	T	TCCGATGCTATCACCATGTATTGACACACCAGAGACGTCCCAGGACGTCTTCCAGGACTCGGTCACAGCGCGACCCCAAAACAAANNNNNNNNNNNNNNNNNNNNNNNNNNNNNNNNNNNNNNNNNNNNNNNNNNNNNNNNNNNNNNNNNNNNNNNNNNNNNNNNNNNNNNNNNNNNNNNNNNNNNNNNNATATAGACGTGACATAACATTTGCACAAATTAGCGGTGTTAAGAAATGGTTACCTCGTGCTTTCTCCTTTCTGTTGTATTTTACTCT	8295:66:+
smaw_01_9663667	C01	9663667	166	-	A	G	CACGTTAAAGCCTATAACCCAACTTCTTGCCTCTTTGATGTGTGATCTCTGTAGAAACAGTGTGTTCGTAACGGGGTCTCCTCAANNNNNNNNNNNNNNNNNNNNNNNNNNNNNNNNNNNNNNNNGCGCCGCTGCCAGAGAAAACAGACGTCAGAGCCCATTGCTTTGGATTCATCAATTATTTGGCCGCGTCGGCCGCCTAGTGTCAGCCGATCAAA	8300:166:-
smaw_01_9695158	C01	9695158	239	+	A	C	GGAGGAAAACACTGAGAAAAACAACATTGGACAGATGTTCCTCAGTTGAAGTACGTCGTCGAGCATCTGTCAGGATCGGCGCAGANNNNNNNNNNNNNNNNNNNNNNNNNNNNNNNNNNNNNNNNNNNNNNNNNNNNNNNNNNNNNNNNNNNNNNNNNNNNNNNNNNNNNNNNNNNNNNNNNNNNNCCTGCATCAGCTCTATCCCACAAAAAACAAACTCAAGAGTCAGTGACACATTAATTTAATCCCTTTCATTTCATGTCGCCAACAT	8317:239:+
smaw_01_9731143	C01	9731143	5	+	C	A	AAACCTGTGAACTTGGGGCTTCAGGACACCACATTCTTATTCTCAGTATAGTCATAAATGAAGTTTTAAAAGTAGGTTCGGGGAANNNNNNNNNNNNNNNNNNNNNNNNNNNNNNNNNNNNNNNNNNNNNNNNNNNNNNNNNNNNNNNNNNNNNNNNNNNNNNNNNNNNNNNNNNNNNNNNNNNNNNNNNNCCCTGGTTCTCTACCGTCTTCACACCAGCATCTACTTTACACATCATCCATCCGTCCACAACCCTCCCTCCATCCCTCAAACCGTACCACCATCCCCTCGTCCC	8350:5:+
smaw_01_9766348	C01	9766348	54	+	C	G	ATAATCTGAAGCTAATAGTTTAATTTTGTATGAATTATTTTAGATCTGAATTGCAGACATACCGCCCAACGAGCTGCTGGCACGTNNNNNNNNNNNNNNNNNNNNNNNNNNNNNNNNNNNNNNNNTAGACGTTGAGGGACTCCACGATGTCGGTTCCCTCCCTCACGGCCACCTTCATACCAGCGTTCACAATGGCAAAGGCAAACTCCCGT	8377:54:+
smaw_01_9776219	C01	9776219	227	+	A	G	CTTCGCTGTCAAGCTGTTCAAGTCTTGGATCAATGAGAAGGACATCAACTGTGTCGCTGGCAGTCTCCGCAAAGTCGGCATGGACNNNNNNNNNNNNNNNNNNNNNNNNNNNNNNNNNNNNNNNNNNNNNNNNNNNNNNNNNNNNNNNNNNNNNNNNNNNNNNNNNNNNNNNNNNNNNNNNNNNNNNNNNNNNNNNNNNNNNNNNNNNNNNNCTTATATTTAATTCACTTTCAAAAATCTCTGGCCCACAGGAACTCTTTCCTGCCAACAAACGGAGCTGTGAGCATTTTTCTAAGTACTTCACCGATGCCGGGCTGAAGGAGCT	8387:227:+
smaw_01_9776419	C01	9776419	49	+	G	T	AGGAGCTCCAGGAAATGATGGCCCGCGGTGATCCCCAGAAGGAGGTGAGGGGGGTTAAGGGTCAAGATTTACCACTCACGGTCACNNNNNNNNNNNNNNNNNNNNNNNNNNNATGAAGTTAAACTTAGCACCATGTCTGTATTTATGAAATGGTTAAATAAGAAAGACAGAAAAAGACCAGGTAGCCAATGCCTCGTTGCTGCCCTAACCCGGCTGTGTGTGTGCTTTCCCAACCGTTTAGATAATCGCCTTCACCAGGGATG	8388:49:+
smaw_01_9802225	C01	9802225	228	+	T	C	AATCTTGAAGGGCCAACCTCCTCAAAGACCCCTTAGCCATCCTCAAGGAGTCCAGGAATGCCTGTAAGGACTGTGCCCTTTGCATNNNNNNNNNNNNNNNNNNNNNNNNNNNNNNNNNNNNNNNNNNNNNNNNNNNNNNNNNNNNNNNNNNNNNNNNNNNNNNNNNNNNNNNNNNNNNNNNNNNNNNNNNNNNNNNNNNNNNNNNNNNNTGACAATATCTCAAGGGCTACATAAATCCCTAAAAAGCTCCTTCAGTCCCAAGCAAATTTGATGCCTCAAATTCCAATTCCCTGACTTCCAGG	8401:228:+
smaw_01_9874234	C01	9874234	202	+	C	T	ACAGCAATACTTGCCCATATAGTACTAACAAGATAAGACAAATACGTTGTTCATTCATCGTCTACCGCTTTATCCATTTAAGGGTNNNNNNNNNNNNNNNNNNNNNATCCCAGCTAACATTGGGCGAGAGGCGGGGTACACCCTGGACAGGTCGCCAGCCTATCGCAGGGCAACATACAGATACGGACAATCATTCACTGTCACATTCACACCTACGGTCAATTTAGAGTCTCCAATGAACCTAACCCCATTCTGCATGTCTTTGGACTGTGGGAGG	8448:202:+
smaw_01_9933879	C01	9933879	264	-	G	T	GAACAGGATGTGTCATGTTTTACGCTGTATGTCCTCTGCCTTGCAGGATGACCAGATCCACCTCAAAATTGCTCAGAAAAGCTAANNNNNNNNNNNNNNNNNNNNNNNNNNNNNNNNNNNNNNNNNNNNNNNNNNNNNNNNNNNNNNNNNNNNNNNNNNNNNNNNNNNNNNNNNNNNNNNNNNNNNNNNNGGCCATATGTGGTCATACCTATACCAAATTTCTCATGCATGATAACAGTCTCACCCTCAACATATTTGCATATCAATATTGAACCAGGGTTATAGTGCCG	8475:264:-
smaw_01_9959524	C01	9959524	80	-	T	A	GTAGACCATCTTCTTCCAGTTATGTACTGTATTTGATTTATCATGTGATACATGTTTTCAGGTGTTAGTATAGATGGGGATTAAANNNNNNNNNNNNNNNNNNNNNNNNNNNNNNNNNNNNNNNNNNNNNNNNNNNNNNNNNNNNNNNNNNNNNNNNNNNNNNNNNNNNNNNNNNNNNNNNNNNNNNNNNNNNNNNNNNNNNNNNNNNNNATTGAACATGCGGCAGTCCGATCGCACCTCTGGCTTTACTTCCCCCTCTCACTTCAGCAGCCCTTCGTTTGCCACTCAGCCTCACCTCAACCCCAGAGCCGGGACCCCTGTAACCCCCGACAGCATGGTGGAGTGTAGTCCCAACCCTGGAGATACAGACTGTATCTCCGATGCCTCCA	8493:80:-
smaw_01_9966045	C01	9966045	10	-	T	G	GCACTTGGCACAGGTGCTCCAGATCTGGCTTTGATTGTCTCCTGACCTGTGACCTGGGCAGACAGACAATACTGACAGCACACACNNNNNNNNNNNNNNNNNNNNNNNNNNNNNNNNNNNNNNNNNNNNNNNCACTCCTGTGTCTACGCGTCTACGCAGGAATTAAAGTTGTCAGTCGCTTCGCTACAGAGAGGCCACGCATGAGATCAGTGTAGATNNNNNNNNNNNNNNNNNNNNNNNNNNNCTAGATTACGCTTGTGTAGGGGAGCGGAATGAAAGAGCGCGCTGTTAACCGCTGTTAACAGCGCGCTCTTTCATTCCTTTCACTG	8497:10:-
smaw_01_10009988	C01	10009988	266	-	G	A	ACCTTCAGAGCTTGCTGCCCTTTTTTTCTGTTACTGTCTGTGGCACAATGAAGGTGCATGTTATACAAGACTCATAACATGTTGTNNNNNNNNNNNNNNNNNNNNNNNNNNNNNNNNNNNNNNNNNNNNNNNNNNNNNNNNNNNNNNNNNNNNNNNNNNNNNNNNNNNNNNNNNNNNNNNNNNNNNNNNNNNNNNNNNNNNNNNNNNNTGTTACTGTACAGGCCAGAACTCGAGGACTGAGCTTGGAGAAGTGACGTGACACGAGCCTGCTGCTTCACTTTCTACACCTCACATCAGCA	8515:266:-
smaw_01_10110821	C01	10110821	242	-	T	A	GGTTTCAAATGTTAACACGTTTCCTTCTTTTCAAGGGTCAATTGTTCCTTCTATTTTAAAATCGGAGCTTGCAGACATGGGGACCNNNNNNNNNNNNNNNNNNNNNNNNNNNNNNNNNNNNNNNNNNNNNNNNNNNNNNNNNNNNNNNNNNNNNNNNNNNNNNNNNNNNNNNNNNNNNNNNNNNNNNNNNNNNNNNNNNNNNNNNNNNNNNNNNNNNNNNNNNACACACTTGCTGCCACCCAGGCCAGTTTACAGACTAGTATACCTTTAGGAGGGTGTCATGGTACGGTGAGCTTTAACCTCAAATG	8561:242:-
smaw_01_10137896	C01	10137896	137	+	C	G	AACTCTCAACTCGGGGCTGCTTGTACACACACTTCCCTTTTCCTTAGCTATATCTGGGATGTGCACACGCACGCACGAGTAAACANNNNNNNNNNNNNNNNNNNNNNNNNNNNAAAGCTGCTTCAGCAGAATACAGCAGAAGAATCTCCAGGCGCCATCCCCTCGTATGAAGGTTCTGGAAATGTTCCTGCTGCTGTG	8571:137:+
smaw_01_10178528	C01	10178528	243	-	C	T	AGCAGCAGCAGCTCTGCCCTTCCATGCAGAAAATTTGACAACACCTGCGCCGCTCCAGACCGTGATGTAATCTCCTACGGTTCTGNNNNNNNNNNNNNNNNNNNNNNNNNNNNNNNNNNNNNNNNNNNNNNNNNNNNNNNNNNNNNNNNNNNNNNNNNNNNNNNNNNNNNNNNNNNNNNNNNNNNNNNNNNNNNNNNNNNNNNNNNNGGGATGACAGATAGATGTTAGTTGAAACACACTCCGTACCACTCCGTCAACACTCAAAGACGCTTGACGGAGCAACGTTAAAGGT	8598:243:-
smaw_01_10187828	C01	10187828	265	-	C	T	TCCTTCTTGATTGCACTGGTGGTGTAAAATCCTTCGGCCAGCAGGATGATGGCGTAGACGAAGAAGAAGGAGGCGATGCCGTAGANNNNNNNNNNNNNNNNNNNNNNNNNNNNNNNNNNNNNNNNNNNNNNNNNNNNNNNNNNNNNNNNNNNNNNNNNNNNNNNNNNNNNNNNNNNNNNNNNNNNNNNNNNNNNNNNNNNNNNNNNNNNNTTTAGTCGTTGGAGCCACCTTGAGGACTTACACCAGGGTGAGGGTGTCGTGGTCGGTGGTGACCCTGGAGAAATGGTTCTCCAGC	8600:265:-
smaw_01_10195686	C01	10195686	30	+	C	T	GTGACGCGGTGCCCGTCCACCTCCAGCTCCTTGTTGAGGAACTCCACGCCGATCGTGTGGAAGAGGTGCGTGTCAAACTTGTTGGNGACGTAGCGGTTCATGAGCGAGGATTTTCCAACGCCGCCGTCGCCCAGCAGGATCACCTTCAGGAAAGTTGACTTGGACATTGTTNNNNNNNNNNNNNNNNNNNNNNNNNNNNNNNNNNNNNNNNNNNNNNNNNNNNNNNNNNNNNNNNNNNNNNNNNNNNNNNNNNNNNNNNNNNNNNNNNNNNNNNNNNNNNNNNNNNNNNNNNNNNNNNNNNNNNNNNNNNNNNNNNNNNNNNCAAGCTCAGCAAACACAGTCATTCTGGCAGAACATTTAGGTCTTTGAGTATATGAAAGCAACAAAGAGGATATGAAA…	8606:30:+
smaw_01_10227412	C01	10227412	251	-	C	T	GTAATTTTTTTTACACTAAATGCAGTAGAATTTATGATGTATTTTTTTAAAGAAAAACAGTTGATAAAGGTAGAGAGAAGTGTAGNNNNNNNNNNNNNNNNNNNNNNNNNNNNNNNNNNNNNNNNNNNNNNNNNNNNNNNNNNNNNNNNNNNNNNNNNNNNNNNNNNNNNNNNNNNNNNNNNNNNNNNNNNNNNNNNNGGATGATGAGTCACATGAAGCTCTTCAGCATGTGGACGGGACGGGGCGGGGCGGGGCGGCAGTACCGCGCCTCTCCAGCAGGAGG	8636:251:-
smaw_01_10268920	C01	10268920	9	+	T	C	CTGACAGCTTACTTTTGCACATTTTCTTATGTAATATCAGTTATTTCCCATGGCAGGTATGAGAAGAGGAAAGACAGACGGGACANNNNNNNNGACTGAGAACTGCGCTTGTCAAAGCGTTGCGGCTCCAATTTTGGCTAATTAAAATCCATAAAACACACACACACACACACACACACACACACANNNNNNNNNNNNNNNNNNNNNNNNNNNNNNNNNNNNNNNNNNNNNNNNNNGGATATTGAGTCCCTGACACAACACAAACAGCTTCGCACACTTATTGATGGCGACGCACGCAAATGCACAATCACAGCCCGTACCGTACACAGC	8667:9:+
smaw_01_10310860	C01	10310860	232	-	A	G	ACAACGTGAGCAGGAAGTGCGCGATGTGAAGAGGGAGATCTCAGACATGCTGCGCCTCATCCAGAGACTCAATGGGGACCTGGACNNNNNNNNNNNNNNNNNNNNNNNNNNNNNNNNNNNNNNNNNNNNNNNNNNNNNNNNNNNNNNNNNNNNNNNNNNNNNTGATCTTCTCCTCCTCCTCCTCTCTTCCCTGTAGGAAGTAGCTCTGAGGAAGGACATCGGCGTCCTCAGTGCCAAGGGCGACAGCAACCTGGAGAAGGCCGGGGAGGACATTGCCCAGCTGGAGGAGGCTTTGAGGCGGGCCA	8702:232:-
smaw_01_10476774	C01	10476774	269	-	G	A	AGGTTGAGGTGAACATGAGAAGGGTCAGTAATCCAGCTTCTTAGGTTTCCTGTTAATTGCCCTTAAAGGAAGTGTTCAGAGGTTCNNNNNNNNNNNNNNNNNNNNNNNNNNNNNNNNNNNNNNNNNNNNNNNNNNNNNNNNNNNNNNNNNNNNNNNNNNNNNNNNNNNNNNNNNNNNNNNNNNNNNNNNNNNNNNNNNNNNNNNNNAAACAAGATGCTGCAAAGTGGCAGTTGCTGAATTTTGTGGTTGGTCAGGCCAAGTTGTCGATCTATAAAAGCAGGAAGGACAAGA	8759:269:-
smaw_01_10515206	C01	10515206	78	-	G	A	CGGTGGCCACCACTGTCACTGCTAAGAAGTCGGAGAGGAAGGCAGCCAAGACTCTGGGGATTGTGATAGCTGTGTTTCTAATGTGNNNNNNNNNNNNNNNNNNNNNNNNNNNNNNNNNNNNNNNNNNNNNNNNNNNNNNNNNNNNNNNNNNNNNNNNNNNNNNNNNNNNNNNNNNNNACTCGTGTGTAAACCCTCTGATTTACTCTCTGTTCTACCCCTGGTTTAGGAAAGCCATCAAACTCATTGTCACCCTCAGAATATT	8778:78:-
smaw_01_10554644	C01	10554644	289	-	A	G	CCGAGCAGCAGGGGTCTGGAGAAACGGAGCAGAGAAAATGGCATTCTGTTGTGGAGACACTCAGCGATAGTGACAGCTACCACGGNNNNNNNNNNNNNNNNNNNNNNNNNNNNNNNNNNNNNNNNNNNNNNNNNNNNNNNNNNNNNNNNNNNNNNNNNNNNNTATCAGTGTGTGAGGGCCTGCGTCAGGACCTGATGCAGAGCTGCGAGTTAACAGATGGAAAGTTTTTCTGCTTGCTTTGTGCATTNNNNNNNNNNNATTCGGGGTGTCAGCGCAACAATTTTAGGCTGACAACTTAAGAAAAGAACACATCACCTTTTATGCTGTGATATATGAGCAAGGA	8810:289:-
smaw_01_10633346	C01	10633346	239	-	A	G	CAGTACAGTGACTGTGGAGACAAGACAGTTCGTCTTACTGACATGCTCAGAGCACTTACATTTGAAATTCTGTCACAGCAAGTTCNNNNNNNNNNNNNNNNNNNNNNNNNNNNNNNNNNNNNNNNNNNNNNNNNNNNNNNNNNNNNNNNNNNNNNNNNNNNNNNNNNNNNNNNNNNNNNNNNNNNNNNNNNNNNNNNNNNNNNNAGACGAACAGTCACACAAACTGATTTCTATGACGTCAGGTAACAAGGTCTGTAATCCTCGAGTGAGCAGCTCTGCCTTCTGTCCTTCATCACGACTTCCGCGC	8843:239:-
smaw_01_10645239	C01	10645239	30	+	C	T	AATGCCCAATTGGTCCCTACAGCACCGAGCGCCTCCTTTTGTTTTTAGATGACCTCCGCCGACAACTGCCAGTAGCACAAAAAGGNNNNNNNNNNNNNNNNNNNNNNNNNNNNNNNNNNNNNNNNNNNNNNNNNNNNNNNNNNNNNNNNNNNNNNNNNNNNNNNNNNNNNNNNNNNNNNNNNNNNNNNNNNNNNNNNNNNNNCCTCAACCCCATTTAGGATTTTTATTTCCTGCCTGGAGGTGGAAGGTGTATGATCATCAGCCACAGAACCAAATGTCCCTCCTGGAGGCAACGGACGCCGG	8855:30:+
smaw_01_10650463	C01	10650463	178	-	G	A	CAACATTAGTTATAGACAGACAGTGGGAGTTGCCTTGTAATATGAATTTAATTCAGTTTAAATCCGTCTCTCTCCTTGTACTGCANNNNNNNNNNNNNNNNNNNNNNNNNNNNNNNNNNNNNNNNNNNNNNNNNNNNNNNNNNNNNNNNNNNNNNNNNNNNNNNNNNNNNNNNNNNATACACACACACACACACACACACACACACAAAGACATTATGTTTTGCATCTCGGCTGAAGCTTGCTCCTTCTGTGTCCACAGGA	8859:178:-
smaw_01_10670474	C01	10670474	258	-	C	T	CCATAACAGAATGCACAGAACAACACACTGCAAATGATTCACTGAACTGTAGTTATTTCAATTATAGTATGACACGTCTCTCCAANNNNNNNNNNNNNNNNNNNNNNNNNNNNNNNNNNNNNNNNNNNNNNNNNNNNNNNNNNNNNNNNNNNNNNNNNNNNNNNNNNNNNNNNNNNNNNNNNNNNNNNNNNNNNNNATCTGTATCATCCAACAGTGTGAATTTTGCGGACGTCACTGTCAGGTGTGAGTTAGTTGCCGTATTTTAGTCCCCTCACTCATCT	8867:258:-
smaw_01_10683273	C01	10683273	46	+	G	A	TTGTTGTTAGCCAACACCTGAAACTTGCCTTCGCAGCACATATGCGAAGAGGAGGACGAATAGAAAAAGACAGAACGAGAGTGAGNNNNNNNNNNNNNNNNNNNNNNNNNNNNNNNNNNNNNNNNNNNNNNNNNNNNNNNNNNNNNNNNNNNNNNNNNNNCAGCAGGAGGGAATTGCCATCTCCACTCTTCAGTGGTTGGACTGTCAATCTTCATTTCAGCACATTTACCTGATAAAGTTCACACAGATAAACACCTACGCAATTACAGTTCCAAATCGTCTCCGCTCTCTCCCTGTGTGGCC	8875:46:+
smaw_01_10687181	C01	10687181	38	-	C	A	TACCTTTTTCATCCTCTCCCAGCAAATCATTAGGGAAGACATCACAGCCTCAATCACACCTGCCACCCCTCAGCCCTCGCCTCATNNNNNNCATAACCAGCTCCCTAAAACCATTGTTTCCATGGCAACCAGGCGTCACTCACTTGGGCCCTCGGTGTAGATTGCCTGAGCAGCATGCGGATGAAAACCCGCCTAAAGCTCCAGCCAACCGCTCT	8879:38:-
smaw_01_10688108	C01	10688108	304	-	G	A	ATCTCTGGAGAATATGTTTTTGAAAGAGCTGAATAAATGTGCGATGCCACCGCAGTAACAATGATGGCTTGTTTACTTTCACATTNNNNNNNNNNNNNNNNNNNNNNNNNNNNNNNNNNNNNNNNNNNNNNNNNNNNNNNNNNNNNNNNNNNNNNNNNNNNNNNNNNNNNNNNNNNNNNNNNNNNNNNNNNNNNNNNNNNNNNNNNNNNNNNNNNNNNNNNNNNNTAAACAGCCCTGTGAGACTATGGTCGATTCCAGCGCTTTCCTGCTCACTCCTCGCCCCCCTCCCTTCGTGTTCCGCCTCGCTCCTCCTCGCTCCGCCTCGCGCCTCCCCGGGGCTGCTGCGCAACTACGGCGTTGCGCTGCCATGACAACAGTCGCACGTGACAAGGCACATACA	8883:304:-
smaw_01_10693865	C01	10693865	15	+	C	A	CAGCAGTCGCACCACGGTGAAGCTGCTCTCTGGCATTTATCACTGGGAGCCATCTGTCATGAAGCGAGGCTGTCTATAGATGGCANNNNNNNNNNNNNNNNNNNNNNNNNNNNNNNNNNNNNNNNNNNNNNNNNGTTGAGGAGCTGCTTTATCAATGTATTCGATCATTGATGCTGTGTAACCCAGTTGTTATGGCAGTCACCATAAGAGCCTCAGGGAAGGAACGCGTGCACCCGCGCACAAACAGTGTGTTTCAAATGAATGCAGTTACTATTCTGGTTGATTAATCAT	8888:15:+
smaw_01_10844212	C01	10844212	254	-	G	A	AGTTAACTAAATGTTGTGGACCAGTCTCTCTCCGTTGGTTTGCATCAGCTGCTTCTCTGCTGTCCTTCCAGTCTGACTTTCCCTTNNNNNNNNNNNNNNNNNNNNNNNNNNNNNNNNNNNNNNNNNNNNNNNNNNNNNNNNNNNNNNNNNNNNNNNNNNNNNNNNNNNNNNNNNNNNNNNNNNNNNNNNNNNNNNNNNNNNNNNNNNNNNNNNNNNNNNNNNNNNNNNGACTCTCAAGTGAACAGCGTGTGGTCTCGTTGCTGACCCGCCCAAGGAGATCAGTCCTGCTGCCAAACACACCTCACCATTGTCATGTAAGCAGTGGCCGGGACACTATGTGTAACAATGTAGGCAT	8954:254:-
smaw_01_10875822	C01	10875822	164	-	T	A	AACACTGCTCTGAATAAAATATGTTTGCCCACTGGGTAGACAGACTGACTGACTGGTAGAATGACTGCGAGGTGTTCCGCAGTAGNNNNNNNNNNNNNNNNNNNNNNNNNNNNNNNNNNNNNNNNNNNGACACTGTGGTAAAAGATTTCAGATCTATCGTGGGAAAACAGAGAAAGATGTATGTTCTGCTGAAGAAAATACAACTCTGGGTAA	8973:164:-
smaw_01_10879702	C01	10879702	11	+	T	G	TGGACTGCACTTACCTGTCGAGACAGAGCCTTATCCTTACTTTGCTATTTCAGATGAGACAAATCTGAAATTCTGTATGCATGACNNNNNNNNNNNNNNNNNNNNNNNNNNNNNNNNNNNNNNNNNNNNNNNNNNNNNNNNNNNNNNNNNNNNNNNNNNNNNNGAGAATGTCAAGCAAGGAAGCAGAAGGCTGCCTGAGAGTACGGGCCGACTTGTGCTGCTGACTTATCAAAACGCTGCCTTTAATGGTTGAAGAGAAACCGGTGCTGTGGCTGTCGCTGTCATGAATTAAAGATCAAAT	8976:11:+
smaw_01_10901235	C01	10901235	269	-	T	C	CATTCAATGGAGGATGACTTTGTTGAATTTGAGTGAGCACCACTGATCCACACATGACCCAACAGCTTCCAGTCCAATTAAGAAANNNNNNNNNNNNNNNNNNNNNNNNNNNNNNNNNNNNNNNNNNNNNNNNNNNNNNNNNNNNNNNNNNNNNNNNNNNNNNNNNNNNNNNNAATATAAAGATGGAAGTTAATTAAATCAAGGGCAGCGACGTGTCTTTCGTTGCAAAGTCATTACAATCAGACAAACTGGGTGATGAAGGAGGGACAAACGTTGCTTTCTATACATCGACCCAGCGTGTGCATA	8991:269:-
smaw_01_10968031	C01	10968031	211	-	C	T	AAAGAGCGAGGTCGCAACGGGTTGTAATCAACGTCTGAGAAGAGGTGGCAAGTCTGTGGTGAGGCCAGGGTGGTGTGTTGTCGTGNNNNNNNNNNNNNNNNNNNNNNNNNNNNNNNNNNNNNNNNNNNNNNNNNNNAGGAACCTATAGCTGGAACTGTGTGGGAAGAAAGCTAAACCCACCAAAGGCCCCACAAATCCAGGAATCTGACAGTCCATTCTTCCATG	9025:211:-
smaw_01_10986300	C01	10986300	193	-	G	T	TCTTACCCATATATAGACAAAGGGTTTATTTTCCTTCTCTACCACAGCGACGGCGAAAGACAGCGATAGGTTGGAGGATGCTTTCNNNNNNNNNNNNNNNNNNNNNNNNNNNNNNNNNNNNNNNNNNNNNNCTAATCTTTCAATATATGCTCCCTTTCGCCAGGAGCCGTGCTACGCGGTCCTTGGCCACGGCAATAAGGTGGATAAGTCCATCAA	9038:193:-
smaw_01_10988360	C01	10988360	52	-	C	T	TCTGTTCAGTCGCGCTCTTCCCTTGGGCTCGTTGCTGTTAGAGGTTTTCACGGCAGCGGGGAGGACAGGGGGTTATTGGTTAGCANNNNNNNNNNNNNNNNNNNNNNNNNNNNNNNNNNNNNNNNNNNNNNNNNNNNNNNGAGCCCCGAGGATGAAGGCCAGTTGGCTCCAGAGGACTGTTAGATGGATTGTGCGCTTGATGTCTCTGCGGCGCAAGTGTCAAAG	9042:52:-
smaw_01_11026196	C01	11026196	83	-	C	A	CTGAGCCCAGCCTCAAGTAGTCAGGTTGCATGTTGAGCTGTACTTTGGTAGACTAAACTCAGTGTTAAAGGGCCCATATTATGTCNNNNNNNNNNNNNNNNNNNNNNNNNNNNNNNNNNNNNNNNNNNNNNNNNNNNNNNNNNNNNNNNNNNNNNNNNNNNNNNNNNNNNNNNNNNNNNNNNNNNTCTTTCTGTATAAACAGCCCTGTGAGACTATGGTCGATTCCAGCGCTTGCCTGCTCACTCCTCGCCCCCCTCCCTTCGTGTTCCGCCTCGCTCCTCCTCGCTCCGCCCCGGGGCTGCTGCGCAACTACGGCGTTGCGCTGCCATGACAACAGTCGCACGTAACAAGGCACATACA	9074:83:-
smaw_01_11036907	C01	11036907	172	+	A	G	GTGAAAAAGGCAACTTTTTCTACTTGTTCCCTTTCGTTCTCTCGCACCTCCTCAGGCCCTTTGGATTCTGAGGCACCTGGGTGCTNNNNNNNNNNNNNNNNNNNNNNNNNNNNNNNNNNNNNNNNNNNNNNNNNNNNNNNNNNNNNNNNNNNNNNNNNNNCACACACACACACACACACACACACACACACACACAAATAAAAACCCAGTACCTCTCTTCAAACTCAGTGACAAAGGCAGGAGCA	9078:172:+
smaw_01_11042662	C01	11042662	201	-	A	G	CGTTACCACACTGAAAAAGACCCAACTCAATTTAACGCAGTTTCTTTTCTGCCACCTCTTACAACAACAACAACAACAACATATANNNNNNNNNNNNNNNNNNNNNNNNNNNNNNNNNNNNNNNNNNNNNNNNNNNNNNNNNNNNNNNNNNNNNNNNNNNNNNNNNNNNNNNNNNNNNNNNNTCCTGTCTGCTTGCCCTCTGTGTTCGCTCCACAAGCCTTATCTATTCAGCACTTGTCGTCCCAGTATCCTGTCTTCAGAATAACT	9081:201:-
smaw_01_11056360	C01	11056360	308	+	T	C	TCGCAGCTCTTCTCCCATTGGTCGCCTCTTAATTGAAGGCGCCTCGGTGTCTGGAGGAGAGTTCACGGACTCATCATGCAGGAGCNNNNNNNNNNNNNNNNNNNNNNNNNNNNNNNNNNNNNNNNNNNNNNNNNNNNNNNNNNNNNNNNNNNNNNCGCTTGTGTTATTGTCAGTTAGTGCCAGTGTCGAGAAGCGACAAATCTCGTGTGCGTCAGCAACTTTCGGCGACGGAGTGAGAAAACTGACCAGCTNNNNNNNNNCCTGCGACCTGCTTTGCTAGTTTGGTTTGCTAAGTTGCTTTGAAAACTGTTTGGAGGAAAATTCAGCAAAGATTTCTTTCAAAAT	9086:308:+
smaw_01_11074104	C01	11074104	309	-	T	G	ACCGCGATACTACCGAGCCATCAGTGAGAAGTCAGATGATGTCAGTGTCCTTTACAGAAAAGAGCCGAGGTTACACACCTAGAACNAGCGTCCCCCTTCTCAACTCGAGTATTAATCCGACTCCAGGAGGATGAATCCGACCGCGTCCGATGGAGCAAATACAATAAACAANNNNNNNNNNNNNNNNCTAGCCGCTGGTTAGCTTCAGGCTGTGGTTGAGTCGCTCTTGACTATTAGCCACTCCAGCAGAATGTGCTGGACACCTTCACTGGTGATCACAGCTTGCGTATATTGTTATTATTCACAACAGA	9098:309:-
smaw_01_11085618	C01	11085618	141	-	G	A	CAGAAACATGAGCGGCGAAGCACTGCTGGGCTTATTTGAAAACAACTATTCACACTGTATATCTGTACATTGTGTACTTGGAGGTNNNNNNNNNNNNCATAGTGCGCATGCTCGGTCGGAACAAAAGACTCGACACTGGTCGGAGGGATGTGGAGACAGTTTACTCGCAGCCCGTCGCTGAT	9123:141:-
smaw_01_11099043	C01	11099043	323	-	G	A	AGGCAGGAAAACTAAATGACTCCCCAAGCAGCACTGCGACAAAAACTAAACAAAAAACAAGATGCAAAAGAAGCTGTGTTGCGTCNNNNNNNNNNNNNNNNNNNNNNNNNNNNNNNNNNNNNNNNNNNNNNNNNNNNNNNNNNNNNNNNNNNNNNNNNNNNNNNNNNNNNNNNNNNNNNNNNNNNNNNNNNNNNNNNNNNNNNNNNNNNNCTCGGCAAACGAAAAGTGGACTTTGTGAGTTTCTGTGAAGGGCTCTGCACTTTCCTGCCAGCGGGTCGGCGCAGACAGGCAAATGTCGACCAGCGTTCAGCTGCTTTATTTACCCATTCAAACCACAAGCTT	9141:323:-
smaw_01_11155854	C01	11155854	57	+	A	T	GCAACAAGTCTCTCATTGCTGCATCATTCTCTCAAACCACAAGTCATATTTTGAGCATATTCTGGACACGGGGCTGTTTTCCTTCNNNNNNNNNNNNNNNNNNNNNNNNNNNNNNNNNNNNNNNNNNNNNNNNNNNNNNNNNNNNNNNNNNNNNNNNNNNNNNNNNNNNNNNNNNNNNNNNNNNNTGCACGTCTGCTCCACCCTCCCCAGTTCCTCTCCAAACTCTTTTGCTCTTTTTTCAGCATTCCTTCACACCTACCCTATCTCTTTGCAGAGCGAAGGCCGGGGTCGCCTT	9177:57:+
smaw_01_11171759	C01	11171759	253	+	T	G	TGTGGGCGCGGAGGCAGTTTGCCTTCTTTTTTGGGGCTACTGGTATTTATAGCCTTTTCTCACAGGGGCTGCTTCAAAAAATGTGNNNNNNNNNNNNNNNNNNNNNNNNNNNNNNNNNNNNNNNNNNNNNNNNNNNNNNNNNNNNNNNNNNNNNNNNNNNNNNNNNNNNNNNNNNNNNNNNNNNNNNNNNNNNNNNNNNNNNNNNNNNNNNNNNNNNNNNNNNNNNTCTTGGGAGAACTGCTATTCTGGCTGTTTTTTTTATTACTCTTATTGATATTGATCATCTTTTTTTAAGCCTGCCAGAAAGAGAA	9193:253:+
smaw_01_11219391	C01	11219391	154	-	C	T	CTGGTTTAAACAGGTCACATTTGTGCACTTTCGTAGCCGTCGTGGCTTCGTGCCACGCCAGTCCATTAAGGTTTGAAACCTCTCANNNNNNNNNNNNNNNNNNNNNNNNNNNNNNNNGGATAATGTGGTTCAGGGCAGCCGCGGTGTTTTCAGGTCTCTGGGCTACATGAGGCTCCCACGTGGCAGAAAACACTTATGATGTNNNNNNNNNNNNNNNNNNGGACGTCTTAATGCACGTCAAGGGGCTGCCTGAGAGGATCGGATCAGCAGCGTTATTAATGAAGGGACTGAATATTGGATTTTAG	9231:154:-
smaw_01_11317552	C01	11317552	82	+	G	A	AATTACGTGTCCACCAGACTCACGACAGAAAAATCTGATCACACAGCCATTCAAGACTGCGGCCGACAGTAATGATGTATAGGCTNNNNNNNNNNNNNNNNNNNNNNNNNNNNNNNNNNNNNNNNNNNNNNNNNNNNNNNNNNNNNNNNNNNNNNNNNNNNNNNNNNNNNNNNNNNNNNNNNNNNNNNNNNNNNNNNNNNNNNNNNNNNNNNNNNNTGATGAATGGATGCAGAGTTGAAAGCCTCAAATGATGTGATTGATGGAAAGGGAGAGAGATCGGTGCGGGACAGCGGGTGACGAGG	9287:82:+
smaw_01_11324761	C01	11324761	48	+	A	G	AAATACACTACTCCTGTCAAAGTAATGATTGCTAAAACCTTACAAAAATGTTTATAATAAGGGTGGCCTATTGATTCATTTCCTGNNAGAGGACACGCACTATGTTTCCCTTTCCCACGGCCTTCATGTAGGCAGTGACGGTGAAAACTGTCAGCCAATGTGAACACGCCACNNNNNNNNNNNNNNNNNNNNNNNNNNNNNNNNNNNNNNNNNNNNNNNTAATGGTACGGATACACACACACACACATGTGGACATATATAGAGTGTTTATAAATAAGTGGATGACAAAAATGCCTTTTGATTG	9290:48:+
smaw_01_11337399	C01	11337399	80	+	C	T	CCATCAGGTGATCAAGGGAAGGCATTAAGAGAGCCAGCCCAAGGCCGCATGGGGGGAGGGGGGAGTGAGGAACAAAGGACCAGAGNNNNNNNNNNNNNNNNGTTGTGGGGTTCAGGAAGAAGATTGGCTGAAAAAAGGACTGACCTCTCGCTCTGCTTTGAGCCCCCACAGGACAACCCCTCATGAA	9294:80:+
smaw_01_11341738	C01	11341738	31	+	C	T	ACTATCTCATTGGCAGAAAGTTCACACTGGCAACTGACCATGCATCACTTAAATGGATGGCAACTTTGAAAGACACTAACGCACGNNNNNNNNNNNNNNNNNNNNNNNNNNNNNNNNNNNNNNNNNNNNNNNNNNNNNNNNNNNNNNNNNNNNNNNNNNNNNNNNNNNNNNNNTCCAGGAGGGATGAATGCTGGTTTGTGGACGCTCTCAGCCCCTGCCTGGAGCTGGAGGAGGGGGTCTGTAGCAAACCAGGGGAAACC	9302:31:+
smaw_01_11347475	C01	11347475	82	+	A	C	AAAAGTAGAAATACGGAAGTCACGATTACGCATCTGATTTTCTTCTCTGTCGGGTGAAGTGCACTTCTGAAGCTAAAAATCAAAANNNNNNNNNNNNNNNNNNNNNNNNNNNNNNNNNNNNNNNNNNNNNNNNNNNNNNNNNNNNNNNNNNNNNNNNNNNNNNNNNNCTCCGACCTCTCTGAGCAGAGCAGAAAACATTAAATGACAGAGCTAATTGTTTCACTCCAGAGTCCATTCTGTCTCCCTCAATCC	9304:82:+
smaw_01_11360161	C01	11360161	33	+	A	G	TGCGCGGCTGCGCCGCAGACACGTGAAGAGGAAAAACTCAAGTTCATGTCAAAGTTATATAGCACACTACAAAATGGCATCACCGNNNNNNNNNNNNNNNNNNNNNNNNNNNNNNNNNNNNNNNNNNNNNNNNNNNNNNNNNNNNNNNNNNNNNNNNNNNNNNNNNNNNNNNNNTGCCGCGTGTGTGCCAAATAATTGGAGAGAGATCATTAAACGAACAGGGCCTTGTTTGTCTCTGCGTGCAAGGACGACCTGTGCAGCACGAAACACACCTCTGTCTCCT	9310:33:+
smaw_01_11366526	C01	11366526	292	+	A	G	AACTCCTCCCGCGACCAGGACAGTCCATCTGACTGCCTCTCTCCAGGGCCTCTTCCCCCCTCTTCCTCCTTCGGGCGGCCACTACNNNNNACGAGCCACAACTCCCACGCACCCTCTCAGCCCCTCTCCCTCTCCTCCTTTGACTTGGACAGGCTGTCGGACGAGCACCTCCGTGCAAAGCGCGCCCGCGTGGAAAACATCATCCGCGGCATGAGTCACTCGCCACTGGTGCGGCCCAGCGCCAGCGACCACAACCAAGAGGGCAACCGTGACAACGAGAACAGCAGCAACAACAGCAGCAGCAGCAACAATCACCGGGGAGACGGCAACAGCCGCAGCACCAGCAACCGCAACCACATCCTGGGCGAGTGTCCCTCC	9314:292:+
smaw_01_11434204	C01	11434204	285	-	C	G	TATTGTGTTGATAGAGGTCTCATACTTTATGATGAAAACTGTTGTACTGTATGTCCATCTTTACTTCATCTATCATCATCTGACTNNNNNNNNNNNNNNNNNNNNNNNNNNNNNNNNNNNNNNNNNNNNNNNNNNNNNNNNNNNNNNNNNNNNNNNNNNNNNNNNNNNNNNNNNNNNNNNNNNNNNNNNNNNNNNNNNNNNNNNNNNNNNNNNNNNNNNNNNCAGCTCCTCCTGGGAGGCGATCCCAGGCCAGATGGGATATATGATCCCACCAACGAGTTTTGGGTCTACCCTGGGGTCTCTTCCCAGTTGGGCGTGCCCGGAAAACCTCAAATGGGAGATATCGTTGATGCAATATAT	9347:285:-
smaw_01_11444419	C01	11444419	40	-	T	A	ATTGCCAGCTGCTGCTCAAAATAGCCAATCGATTCCTCAAACACTCCCATGTTCATTTTGGTGATGCCCATGTTCCCGTGGACCTNNNNNNNNNNNNNNNNNNNNNNNNNNNNNNNNNNNNNNNNNNNNNNNNNNNNNNNNNNCTGGAAGGTTGTAGCGTAGTCTCCAAGGGCCATGTGCACTGCTGCCAGGTGGCCGAGGGCGCGGCACTCCCCCTGCTGATCACCTATATCCTTCCAGACGGTCAGTTCCTGGCTATGGAAGGACAAGGC	9356:40:-
smaw_01_11460730	C01	11460730	23	+	T	C	CCTCCATCAGAGCATGCTGCTGTGAGGTAACGCTCTGAAATCCCCAAATGGTATATTGTAAATTGTAGCTCCAGGCACATTAACCNNNNNNNNNNNNNNNNNNNNNNNNNNNNNNNNNNNNNNNNNNNNNNNNNNNNNNNNNNNNNNNNNNNNNNNNNNNNNNNNNNNNNNNNNNNNNNNNNNNNNNNNNNNNNNNNNNNGTACACATCGCAGCAGAGCGTCGAGAATAAGGTCTGAGTGTTGTGGGTCCTTCCCTCTCTTTGGCTTTAAATGTCAGTCTGTCTTCTCTGCTCATGTCCGTGTGTTTCCTCTCCTCTGGGTTGCTGTAGG	9365:23:+
smaw_01_11464385	C01	11464385	118	-	C	A	TAGTGGCAGTGTGTCACAGTCCCTCCCTCCTCGTCCTATCGGCTCACTGCTTATAATGGAGAAACCCTCATACTCCTCGTCCTCCNNNTCTCCACCTACTCCTTCGTGATTGGTGTGGCGACATCTTGACAGGCCACCTGAACGGCGAAGCGAGGTGTAGAGGCCTGCCCCAC	9367:118:-
smaw_01_11466216	C01	11466216	225	+	T	C	AAGCAAACGCGAGAGGGAAGACACTGAGGGTGCCTGAGGGGAGAGAGGAGGCACATGCCAGACAGCGCTCTCTCTCCAATCCCACNNNNNNNNNNNNNNNNNNNNNNNNNNNNNNNNNNNNNNNNNNNNNNNNNNNNNNNNNNNNNNNNNNNNNNNNNNNNNNNNNNNNNNNNNNNNNNNNNNNNNNNNNNNNNNNNNNNNNNCCTAGTCACCGTTCACCCCTCTCCACTTCTGTCTCAACACCTCTCCCGACTCAGCCTAAACCACCATCCCGCTCCTCTTCCCTACAGAAAATCAGCTCC	9368:225:+
smaw_01_11497491	C01	11497491	25	+	G	A	GAAGAAGGTCCCCCTCAGTGAGGAGTATCACTCTCACCTCTTCATGGCGTACGCTCGTGTTGGGGAGTACAAGAAGATGCAGCAGNNNNNNNNNNNNNNNNNNNNNNNNNNNNNNNNNNNNNNNNNNGCACATGACTAAGAGCTGCGGCTTTTGTGCTCCATTGGTAATTTAAAAAGATGGACACATAATCAGAGTTATGAAGAGGATGTTGNNNNNNNNNNCTTCGCACTTTACAGGCAGGAATGGCCTTGTATAAAATTGTCCCCAAGAATCCCTACTACTTCTGGTCTGTCATGAGTCTGGTGA	9385:25:+
smaw_01_11530967	C01	11530967	175	+	G	A	TGAGTGACCAAGACAGCAACACCTCGGCCTCCCAAACGGAAGGAGAATTTGAGGGCGAAATGGAGGGGGAAGGAGAAAGAGATGANNNNNNNNNNNNNNNNNNNNNNNNNAGTGTGTCCTCCACTTTGTGTACCGTCATACGCATCAAACAGAAGTACCAGGCCTTGAAGAGGCGGCGTCAGGAGATGGTCCTGG	9401:175:+
smaw_01_11549888	C01	11549888	14	+	G	A	AAAGAATCCTGAGGATCTGACACAGAAGTGGACACAGCAGGCTCTGAGCGTCAGAGGCCTCAGGGAGAACGATAGCGACCGACATNNNNNNNNNNNNNNNNNNNNNNNNNNNNNNNNNNNNNNNNNNNNNNNNNNNNNNNNNNNNNNNNNNNNNNNNNNNNNNNNNNNNNNNNNNNNTTACAGCAGTCAAGTCACACATAAGTACAACTTAAATACAATAAGCACAGAAAGAGGTGTAGGTAAGAAATAAAGCAATTAATTA	9416:14:+
smaw_01_11573233	C01	11573233	129	+	T	C	ACCTGGAGAAAGAAAGTCCCTCGCTACCTCGGGTCGCTTCTCACGTCCACTTACGTCGTTACTTCCTCAGTCGCTGTGCAACCTTNNNNNNNNNNNNNNNNNNNNNNNNNNNNNNNNNNNNNNNNATTTGGGCTACCTGTTTTATAAATGTTGTTAATTTGAAACCCGTCGATTTGGTTGTCGTAAAAGTTTTCCAGCATGCCACTTGCCCCCCCACACACACCCGGCACCAGGAACTCATCTCCAGCCGTCTCTCCTCCTCCT	9434:129:+
smaw_01_11630715	C01	11630715	176	-	G	A	TCTCTGAGTTCATTCAGCTCTGTGGTCAGAAACCCCTTGTTGATGTTGAAAAAGTTTATCTCAAGCTGGTTCCACCAACGTGACANNNNNNNNNNNNNNNNNNNNNNNNNNNNNNNNNNNNNNNNNNNNNNNNNNNNNNNNNNNNNNNNCACCTTTGGGATGTGGTACAGTCATGCGAGTCATGTTAGCGTAGACCAGAAACTCAAAGGAATGTTTTCAACATCATGTGGAATCCNNNNNNNNNNNNNNNNNNNNNNNNNNNNNNNNNNNNNNNNNNNNNNNNNNNNNNNNNNNNNNNNNNNNNNAGTTTTACTTTCATGACCAGTGTTTTGTTGAAAATGTCCACAAAGTTCACTGAACACCACTCTAAAACAGTTATGAATATTATAA	9478:176:-
smaw_01_11635353	C01	11635353	5	+	A	G	TGGAACTGGGCAAGATCAGGGAGGAGCACAAGGAGCTCAAAGCCAGGTACGAGGAGCATGTGGGGGTGGGGCTTGACCTACATTANNNNNNNNNNNNNNNNNNNNNNNNNNNNNNNNNNNNNNNNNNNNNNNNNNNNNNNNNNNNNNNNNNNNNNNNNNNNNNNNNNNNNNNNNNNNNNNNNNNNNNNNNNNNNNNNNAGTGCTGAGTTCTGGTCCAAAGGTGAGATAATACTTTATATTATGTGACGTTAATATAGCATTACTTTTTGCCCCTGTACTTGGT	9484:5:+
smaw_01_11658079	C01	11658079	265	+	G	A	GACAACAAAGGTAGTTTTTATGAGATCAGTTCTGGTTTCGGGCTTTTGGAGCATTAACCAATCACTGGTTAATGCAGGTCGGTTTNNNNNNNNNNNNNNNNNNNNNNNNNNNNNNNNNNNNNNNNNNNNNNNNNNNNNNNNNNNNNNNNNNNNNNNNNNNNNNNNNNNNNNNNNNNNNNNNNNNNNNNNNNNNNNNNNNNNNNNNCCCCGTCCACCAAGGTCACGGTTGCGCGGACCTCTGGTTCAGGCCACGGCCACAGCCACGGCAGCCGTCTGCTCCTCTCCTCAACCACCGCCTCGAGCA	9497:265:+
smaw_01_11690376	C01	11690376	200	-	C	G	GGCCCTCGATCAGCTCACGGCATTCCTCAGTTCGTACGACGCTCGTACGCTTGGTCCGCTGCTTTGGGACCTCGACAGCATGAGTNNNNNNNNNNNNNNNNNNNNNNNNNNNNNNNNNNNNNNNNNNNNNNNNNNNNNNCTCCGAACTTGTTTCAGCGTATGGGACTCATTTGACTCCCGAACATGAAAACACAAGATCGGTCCCTTAAAGACGGTGTAGTGGGTGTTGGAGTGTGTGTGCATGTAGAGATTATGTGTGTG	9519:200:-
smaw_01_11745214	C01	11745214	62	-	G	T	CTGAAAACATAAATTTCTGTCTCGTTCTCTGCTGATAACCAAAGTGAATCCAGCTGTTCTACTTCACTGGTCTGTTATTGCCCTCNNNNNNCCTCCCCCCCGACTTCATGAGAAATCTCATGCAACAGATCAGCCAATACGCCGCTGCTGTAGCTACCAGTGCCGCCACCGCCGCTGCGACTNNNNNNNNNNNNNNNNNNNNNNNNNNNNNNNNNNNNNNNNNNNNNNNNNNNNNNNNNNNNNNNNNNNNNNNNNNNNNNNNNNNNNNCACCACCACCCCTACCGCTCCCCCACCGCCTCCCAATGCTGGTCCCCAGGCCAGGGTTGTGTTCACCAGACCCCCTTTCGCACCC	9548:62:-
smaw_01_11755158	C01	11755158	16	+	A	G	AACAGAAATACCGAGATAAACATTTCAACAACTTTCACAGCCTCTGTTCTTTCGTTTTGTGGTCATTGTTGCAAGTTGTAGGCTTNNNNNNNNNNNNNNNNNNNNNNNNNNNNNNNNNNNNNNNNNNNNNNNNNNNNNNNNNNNNNNNNNNNNNNNNNNNNNNNNNNNNNNNNNNNNNNNNNNNNNNNNNNNNNNNNGCAGTCAGTCATAGAGAGGCCGACATCCAGAATTTTAAAGCACTGGACAACCTTTGGTTCACAATGGAGGAGACAGCCAATGACA	9555:16:+
smaw_01_11803609	C01	11803609	202	-	C	T	CACAACATTACATCTTATAAAATCAGAAGTCCACCTCCACACCTGAGGTACATTAGCCACGTGCTAACTGGACCCCGATCGTAACNNNNNNNNNNNNNNNNNNNNNNNNNNNNNNNNNNNNNNNNNNNNNGCCGAGTTGGAAGTAGTAAACGTTCTGCCGCTTGTGGTTCTGCGCCATCACTTTGCAGCGCAACTGCCCACGCGAACACTGTTAAATATGATAAATTCCAGAAACAACCGTACATTTCTACACACTGTTGCCACATGATGACGTCACACCCTCAGTATCGCTCCTGTACCGGAGCCCGCAACAGAAACTATCCGCGGGAGCT	9588:202:-
smaw_01_11817952	C01	11817952	11	+	G	A	AAAACATGAAGACAGACCATTGCTTAGGTACATCAGCAGCAGCAATATAATGCCACAAAAGCACAGCTTGATGAAGCACCGCAGCNNNNNNNNNNNNNNNNNNNNNNNNNNNNNNNNNNNNNNNNNNNNNNNNNNNNNNNNNNNNNNNNNNNNNNNNNNNNNNNNNNNNNNNNNNNNNNNNNNNNNNNNNNNNNTACAGCTGTGAGCTGGAGGAGGGAGAGGGGGAGGGCGACACAACCAGCAGCCGAGGTGAATTTTTAATCAAAGCACCTTGAGGTTCTTG	9599:11:+
smaw_01_11835047	C01	11835047	270	-	T	G	TTCCGATCCACGCTCATTTGCCGCGGCGTCGAATTGGCACGTCGCCCTCGTGTCCTCGCATGAAAATCGCGAGCAGAGAGGGATGNNNNNNNNNNNNNNNNNNNNNNNNTTCCTCCGCGAGCAGAGAGCGATGCGCGTCCGCTGCGCGGAGACGCGTGATGGAGTGCGGGACCGAGGGCTCGTCTGAAAGTTGACCGACGAGAGAGACGAGCGGCACCGCGTCCTCCGCGAAGTGGAGACTACACTGAGCTGTGTTCGACTTTCTCCCCAAAATTCATGTATAATTAAACCTCGCAATATGCCGGATGTTTACGCGGGCTGAATTCTTTAAACGCTTGCAATTGAAAGTCGACGCATGTCGTT	9609:270:-
smaw_01_11847939	C01	11847939	5	+	G	A	CTGTGTAGGCGGCTTGTGAATGCCATGCGTGAGTGACAGACGGACAAAGTGCTACATATAGATTCGCTGTGAGAATGTGTGTGTGNNNNNNNNTTAGTGTGTGTGCATGTAAACTGTACTGTAAAGCGCTTCAAGTGATCGTTAAGACCAGAGAAGCCCTGTGTAAACGACTCGTGCAGCGGCTGTGGCTNNNNNNNNNNNNNNNNNNNNNNNNNNNNCCGAACGTCCAGCGGTTCGATCCCAGCTTCACCCAGGCCGCATGCGGATGTGTTCTTGGGCAAGACACTTAACCCTAAATTGCCT	9618:5:+
smaw_01_11864758	C01	11864758	4	-	T	C	GTAATTATCATCATGTCCTGCCTGCTCCACTCAGACGCCACAGAATGTTCAGGACATTTTCCTGCTGCTGTGAACGTGTCCGACTNNNNNNNNNNNNNNNNNNNNNNNNNNNNNNNNNNNNNNNNNNNNNNNNNNNAATCCTTCAGACTTTTTTTCCAGAGTTCACGTCTGAAAACAGCTTAAGCCACGACAGGATTGTTAAACGAGTGATCATGTATTACT	9630:4:-
smaw_01_11872865	C01	11872865	165	-	A	G	GAATGCTCGGTTGTGTAATTCCTCAAGGTGACAGTAGGGGCGGGACTTCCCCTCACTTGATCTACCCAGGAAGTCGTCGTGTTACNNNNNNNNNNNNNNNNNNNNNNNCTCCCGCAGTCCTTACGAGAAGCAAGGGGAACTGAGAAAGGGCAGTCAACTTGCCCTCAAAAAGTGGCTGGGAAACAAGCAGGGGGGCAGTTCCACACCGGCCGCGCCCGCGCCTTCGGTTTGCGC	9634:165:-
smaw_01_11940456	C01	11940456	77	-	T	C	TAGTAAATGGATTCTCATAACGGCAGACGTGTTCATGTAGAAAGGAAACACACACACATCCTTAAAATATACACACACACACACANNNNNNNNNNNNNNNNNNNNNNNNNNNNNNNNNNNNNNNNNNNNNNNNNNNNNNNNNNNNNNNNNNNNNNNNNNNNNNNGGTCATGTGAGGCGACAGGGACAGACTGTGAGTCTCCGCCATGTGCTGCTGTGTCAGTGAACACTTCAGCTCTGTCAGGCTATTGCNNNNNNNNNNNNNNNNNNNNNNNNNNNNNNNNNNNNNNNNNNNNNNNNNNNNNNNNNNNNNNNNNNNNNNNNNNNNNNNNNNNNNNNGTAGAGCGTGCGCTGGCTTTGCGTGCTGAGCAACGCCGCAACGTTCTCTCATCTCTCCTCTC…	9678:77:-
smaw_01_11961367	C01	11961367	75	-	C	A	TAACTTAACGTGACCTATCATGAGCTGATGGGTTCACCGATGCTCGTTAGCCCAGTGGGTTTTATTCATGGCCCGTGTCTTTTCANNNNNNNNNNNNNNNNNNNNNNNNNNNNNNNNNNNNNNATCCAGACCCGTCTCCCTCTACTCAGAGGCGCGAGGAGCAGGTCTGAGCAGCAGAGAGGATAAACAGTTTTCCCCCCCACACATACTTGAGGAACCCTCCCTTCAGTGACTCTGCCGCTTGTCCTCCTCACCGCTCACCCCACTGTAAACGGAACTACAGCCCCCCCGGTCCACTGTTCAACTCAGCC	9690:75:-
smaw_01_11986549	C01	11986549	3	+	C	G	CACAAGGAGAATGGGCTCCGCACATCATCCATGTTACCGACAGTTTACCGACAGTTTACGGCCACTGTGTAATGAGAGACCGCCTNNNNNNNNNNNNNNNNNNNNNNNNNNNNNNNNNNNNNNNNNNNNNNNNNNNNNNNNNNNNNNNNNNNNNNNNNNNNNNNNNNNNNNNNNNNNNNNNNNNNNNNNNNNNNNNNNNNNNNNNNCTACAAGCGAGAGGTCTCTTTACTACAGCTGGTGAGGTGACAGCAGTTACCGACAGAGGAGTCGAGCCTTCGTAGCCTCCGTCATCGCGCAAATTAGCGGGTTCACCCGGTCGTGACGTTCACATCAGTGTTGATCGGAGGTGAA	9702:3:+
smaw_01_12006770	C01	12006770	46	-	G	A	CGAGCTGATTCGGGGCTCCTCCTTAACCCTCAACAAACCGAGTCGCCCGCCCCTATGCTTCGGCGAACACTGACCGTTGGTGTGGNNNNNNNNNNNNNNNNNNCCGTCCTCTCGCTCTGGCACGGGCTCCACGAGGAGAATGGCGCCAGCCAAAGCCCCGCCGTTGCAGTTGACGGCCTTGCAGGTGTAGACACCTTTGTCCGGCATGCGCGTCCTGTAGACCTTGAGCTGGAACCAGCCGCCGTCCTGGATGCTCACGCTG	9713:46:-
smaw_01_12010633	C01	12010633	65	-	G	A	TGGGCGCTGTTCAGGAACCAGGTTCCGACCATTGAGGCGGACAGTTCGATTGAGAAGTGAGCATCTTCTCCCTCCACAAGCTCACNNNNNNNNNNNNGACTGTGAATTTTGGGCCCAGGAACTACGAACAATAGGAGAGGGAGGAACAGAACTATAAGTTAACAAGAACTCTTTGTTTCGAANNNNNNNNNNNNNNNNNNNNNNNNNNNNNNNNNNNNNNNNNNNNNNNNNNNNNNNNNNNNNNNNNNNNNNNNNAAATTCTACAAAAATAACACATCATTGTCTCACCCAGATGGACGGCTTTGGGGAACTCCACGTGGCCACTTCGCCCGTACTTGTTGATACAGCACACCC	9716:65:-
smaw_01_12030373	C01	12030373	286	-	C	T	TTGTTTTGATAATGAAAATCGTTGTCGGCTTCACTTGTGATAGTTCAGAACGGGTTAAAAGCTGGTAAAGGCTCATTACAAACTGNNNNNNNNNNNNNNNNNNNNNNNNNNNNNNNNNNNNNNNNNNNNNNNNNNNNNNNNNNNNNNNNNNNNNNNNNNNNNNNNNNNNNNNNNNNNNNNNNNNNNNNNNNNNNNNNNNNNNNNNNNNNNNNGACTGAGATCTGTTAAAGCCACGTTACAGACGCCCTCCTTGCCGCATAATCACCCCCTTGGCTTGGGGAGCCCGCGGAGGCAGCT	9733:286:-
smaw_01_12031815	C01	12031815	139	-	T	C	AGGCGGCTCATCGCCAGCAGGGGGCGCACCAGCTGAAGGCACACCTGAAAAACACACACGATACTGTTAAAAAGCATTGGGAATTNNNNNNNNNNNNNNNNNNNNNNNNNNNNNNNNNNNNNNNNNNNNNNNNNNTAAAGACCACCACAACCTAAGTTTGAATCTAAAATGTGGAGCGTATACCAGTGCGATGGGGGCGGGTGTGCAGTGGAACTCCCAG	9739:139:-
smaw_01_12059315	C01	12059315	61	-	A	T	ATGCATATTCAAGACTGGAGAAACATAAGATAAATTCCACTCATGCATTTCAATAAAACATATTTGAAAATTGTAGTTTTTGAGTNNNNNNNNNNNNNNNNNNNNNNNNNNNNNNNNNNNNNNNNNNNNNNNNNNNNNNNNNNNNNNNNNNNNNNNNNNNNNNNNNNNNNCCACCATCTCCTCGAAGGCAGCATCTCGGGTCTCGTCCGCTTTGCCGAGCTTCTGCAAGACCTGCAAACGGTAGACAGGAAGAGAA	9762:61:-
smaw_01_12063372	C01	12063372	183	+	G	T	AGAAAAGACAGTCGAGGGTGCGAAGAGGTAAAACCTGCTTCTCTCCGATCCTCATTCAGCCACGTCGGCTGAGCATGCAGCTTTTNNNNNNNNNNNNNNNNNNNNNNNNNNNNNNNNNNNNNNNNNNNNNNNNNNNNNNNNNNNNNNTGGCATTTTTCTGTGTGTCCAGTTTTCGGAAGCTGGTCTGGGATTTAAATCCTGCAACTTTGCTTGCTTCGTTAACTTTTGTGCT	9768:183:+
smaw_01_12074042	C01	12074042	48	-	C	T	GCGACACACAAACGGATGAGCGTCGAGTTCGGTAGTGGATCGGTTACGAACTGTCTTCAAATTCATATGGTAGCAATATGTGGAGNNNNNNNNNNNNNNNNNNNNNNNNNNNNNNNNNNNNNNNNNNNNNNNNNNNNNNNNNNNNNNNNNNNNNNNNNNNNNNNNNNNNNNNNNNNNNNNNNNNNNNNNNNNNNNNNNNNNNNNNNNNNNNNNNNNNNNNNNNNNNCCCTGGACAGGGCGAAATACATCTCCATCTCCGCCACCCTCTTCCCCACGCACGCTCGCACGCCGACACCAAACGGGATGAAGCTGTACGGCTGGTGCCGGT	9782:48:-
smaw_01_12076813	C01	12076813	302	-	A	T	GTCTCCAAGTGCGTGAGCAGAAATTCACCCTCGCCTCCTCCCACTGTTTCATACCGCCAGTCTGTGAGGTGGAAAACACACACACNNNNNNNNNNNNNNNNNNNNNNNNNNNNNNNNNNNNNNNNNNNNNNNNNNNNNNNNNNNNNNNNNNNNNNNNNNNNNNNNNNNNNNNNNNNNNNNNNNNNNNNNNNNNNAGAAGGAAGCCACTTGTCTTTCACTGAGTTTTGGGGGTTTTGAATCAGGCTGCTGCTCCGAGTGTCTGCCACAAGAACAGGTGCGAGTTGAACGGAACGGTTACGGATACTCGGATTCTTTACAACATCTCCATCCAACCTTGAGGCCGGTGGTCCACTACTCCAGAAGACAAAGTCAGGATCTGAGACCTGAAGACTGGAA	9788:302:-
smaw_01_12092847	C01	12092847	67	+	T	C	GATGGAAAAACGGGCAGATTTATGAGTGTTTAAAATATGACTAAAATAGACTTTCTGTTCAGTTATTGTGCAATTAATCTGGACTNNNNNNNNNNNNNNNNNNNNNNNNNNNNNNNNNNNNNNNNNNNNNNNNNNNNNNNNNNNNNNNNNNNNNNNNNNNNNNNNNNNNNNNNNNNNNNNNNNNNNNNNNNNNNNNNNNNNNNNNNNNNNNNNNNNNNNNNNNNNNNNNNNNNNNNNNNNNTCTCCACGTCCAGCGCCATCTTGACATTGAGCAAGTCCTGGTACTCGCGGAGGTGGCGCGCCATCTCGTCCTTCATGTTGGCGATCTCCGTCTCCAGCCGGGTGATGGTG	9804:67:+
smaw_01_12093462	C01	12093462	44	+	T	C	GTCAAAGGTCAAAGTTCAGGTACAGCTATAGCTGGTATAGGTGTAAACCCACCCTGTTAAAGGGTAACACTGCATTTTAGCCGACNNNNNNNNNNNNNNNNNNNNNNNNNNNNNNNNNNNNNNNNNNNNNNNNNNNNNNNNNNNNNCTCACCTTGGACTTATACCAGTCTTCGGCCTCCGCAATATTCTTGGCGGCGATGCCTTCGTACTGTGCTCGGATGTCTCTCAGTG	9807:44:+
smaw_01_12100623	C01	12100623	76	+	T	C	TTGTCGCTGTCATGTCTATTAATAGATAGTCTGAATCCTGGTGTTCGTTTGTTAGTGTGTGTGTGTCCCTGGGCTTCCTCAATAGNNNNNNNNNNNNNNNNNNNNNNNNNNNNNNNNNNNNNNNNNNNNNNNNNNNNNNNNNNNNNNNNNNNNNNNNNNNNNNNNNNNNNNNNNNNNNNCTCCGTCTCCCCCAACCTCATCCCCCCAACCTCCTCCCTCGCTGTTCAGGACTATATAAGGTTAGTTCCTGTAGCGATAAAGTGA	9814:76:+
smaw_01_12115316	C01	12115316	58	+	T	C	TTGCCTGTTTGAGAAGAAGCTGTGTCCCAGAGATCAGCCGTGCAACGACGGTGAGTCTTACACTTTTAATCTCCAGTTCCTGCACNNNNNNNNNNNNNNNNNNNNNNNNNNNNNNNNNNNNNNNNNNNNNNNNNNNNNNNNNNNNNNNNNNNNNNNNNNNNNGAGAGCAAAGTGACCGCGACAATGATTCGGCCATGTGTCCATTCTGTTCTGCTCACCTGGAGGGGGTGTTCATTACTGCCACACAT	9825:58:+
smaw_01_12126290	C01	12126290	317	-	G	C	CACATCAGTCCATGATCATTTTTGTGACTATGCAACTGGACCCAGACTACTAGCTGCAAACCACAAGAATGACACAGACAGATATNNNNNNNNNNNNNNNNNNNNNNNNNNNACAGGGTGGGAAGACGGGAGGAGAGGAGGGACAGGGGAGGGCGAAGGGGAGCGGGCAGGGACAGACTGAAGGATGGGAGAGAGAAATATTGTTGCTATGCAATGCATAAACAAATTCTTNNNNNNNNNNNGCCTGCCTGTTAAGTTTTTTAAAAATGTGAATGTACAGGTGGTAGTAGTACCTGCGGAAGTCGAGTAGGGGGCGCGTTGAGGTGG	9835:317:-
smaw_01_12139045	C01	12139045	28	-	C	T	GTATGACATCCCAGTGTTTGAGAAGTCGGGGAAAGGGGGAACGTATCCTCGACGATATGGCATTCCCTTCGGCCTTCAAGACTACNNNNNNNNNNNNNNNNNNNNNNNNNNNNNNNNNNNNNNNNNNNNNNNNNNNNNNNNNNNNNNNNNNNNNNNNNNNNNNNNNNNNNNNNNNNNNNNNNNNNNNNNNNNNNNNNNNNNNNNNNNNNNNNNNNNNNNNNNNNNNNNNNNNNNNNNNNNNNNNNNNNNNNNNTTCACGGCTTCCGCTCACCTGTCAGCTTCAGTCCAACCGAGCAGTCGCCCAGCACCAGCAGCGGCAGCAGTGTCTTCACCCCTGAC	9839:28:-
smaw_01_12151853	C01	12151853	16	-	C	T	TACATCAGCCTGACCGAGGCCTTCACACCGCCAGAAATAGTGGCAGGTCAGGTTCTCATGGTCCTGTCCCTGCTGGTGGGGCTCTNNNNNNNNNNNNNNNNNNNNNNNNNNNNNNNNNNNNNNNNNNNNNNNNNNNNNNNNNNNNNNNNNNNNNNNNNNNNNNNNNNNNNNNNNNNNNNNNNNNNNNNNNNNNCCGCTGTGACGTCTCTCATACCTCTGCTGTGGAATCTGAGCTCAGTGGTGACCAATCAGACCATCGTGTTCCCCCCTGAGTTCAAA	9841:16:-
smaw_01_12152019	C01	12152019	248	-	A	G	TGCCTGTTTGCCAGGTATCCCAGGTGACAAAAGAGCATCAGAACAAAATAAAAATTAAAACGCCTGCAAGGTGGAGTAAACAAGANNNNNNNNNNNNNNNNNNNNNNNNNNNNNNNNNNNNNNNNNNNNNNNNNNNNNNNNNNNNNNNNNNNCCCTCGTGTGGCTCCACTCCTATGACCTACTTGGTTAACACAGCCCACGCCCAGCTCGTCGCCCTCTGGCTGAGCTGCGTGGGCTGGACTCTCACTGCCGTGGCGCTTGGACTCATCAAGTGGAGGGTTTGGCAGGTGTCGGACACGGAAGTCATCAGCTCCGGCATGGCCTGGGTGGGCATCTGGAGGGCCTGCTTCAATAGCCACA	9842:248:-
smaw_01_12189095	C01	12189095	293	+	C	T	GTAAGCTGGCAGTTAACTATTTTGAGTTATTTCAAATCTGTCATTATTTGTCTTGTTCTTCGTTGTGTTGACATCTGGGAGCAGCNNNNNNNNNNNNNNNNNNNNNNNNNNNNNNNNNNNNNNNNNNNNNNNNNNNNNNNNNNNNNNNNNNNNNNNNNNNNNNNNNNNNNNNNNNNNNNNNNNNNNNNNNNNNNNNNNNNNNNNNNNNNNNNNNNNNNNNNNNNNNNNNNNNNNCCTTAATACAGGGAACAGACACTTTTCTTGGGGACTTTTATTGATTTCCTGCCAAGAGCAGTTGTTTCAGGTACTTGGCTCCTGG	9872:293:+
smaw_01_12272006	C01	12272006	29	+	T	G	GCAGGAGTTGCAGTTCTTGAAAATAAATTTGTTGTTGTGTCTTGGTCTGTGAAGCCTGCATGATGAAAAACACTCAGAGCTATAANNNNNNNNNNNNNNNNNNNNNNNNNNNNNNNNNNNNNNNNNNNNNNNNNNNNNNNNNNNNNNNNNNNNNNNNNNNNNNNNNNNNNNNNNNNNNNNNNAGACACATCGCAGCTTTGTGACTGTGATGTCGAAATATATTTTCCCAACTCGCGACCCCTTGACGTCAAAGGTGAAGGCGCAGCGG	9937:29:+
smaw_01_12281537	C01	12281537	169	+	G	A	GTCTGATGCGGTGGTGGCTGCACTGATCAGTTTGATCGCACCTGTCAAACTGCTTTTTACTGAATAGGAATGATGAAGAGGATGCNNNNNNNNNNNNNNNNNNNNNNNNNNNNNNNNNNNNNNNNNNAGGAGGCCACTCGGCCCAGATGACCACGTACTCCGACAGCGGCTACCAGGACAGCAGCGTTAGTTACTACAGTAACAAGAACGTGGT	9948:169:+
smaw_01_12346125	C01	12346125	253	-	G	A	TTTGTCGGCTGCACATCTATGATGCGAATCTCCCGTTCCACCACATCCCAAAGGTGCTCTATTGGAATGAGATCTGGTGACTGTGNNNNNNNNNNNNNNNNNNNNNNNNNNNNNNNNNNNNNNNNNNNNNNNNNNNNNNNNNNNNNNNNNNNNNNNNNNNNNNNNNNNNNNNNNNNNNNNNNNNNNNNNNNNNNNNNNNNNNNCAAGGTCATAAAGGGATGGACATGGTCCAAAGTGTGCCAAGAAAATATCCCCCACACCATTACACCACCACCACCAGCCTGAACC	9984:253:-
smaw_01_12404526	C01	12404526	82	-	A	C	GCAGGTCTCTCAGACAGGACAAAGGCAGCATGTGATGCGGAAGGCGCGACTGTTCAAAATTCACTCTGAGCACAGTTTTTGTCCCNNNNNNNNNNNNNNNNNNNNNNNNNNNNNNNNNNNNNNNNNNNNNNNNNNNNNNNNNNNNNNNNNNNNNNNNNNNNNNNNNNNNNNNNNNNNNNNNNAGATGTGCGCAACCAAAACTCGGAACTGTAGGCAGATATTAATAGGTGATATTATTCTGGCGTCTTCCTTGCTAGAACATGAACCT	10029:82:-
smaw_01_12413076	C01	12413076	158	-	G	T	CTTTGTGATATTGCTATATCACTGCAAATTCAATATACAGTTCAGCTTTAAGCCCAAGTGGCACTTAACACACCCTTCAAATAAANNNNNNNNNNNNNNNNNNNNNNNNNNNNNNNNNNNNNNNNNNNNNNNNGAGATAACGAGTCATGTTAAATTGCTTGTCTTGTAAAGAATGCTTGGTATGTGATGGCCGACGCGGCCCATTACACACGAGGGACACAGGGGCAACGCCGGTATGTGCTCCTTGTGCACACGGCGTGCAGTCGGCAGCGATTCGGGGGCGAGAGAACCCCGAGTGCT	10037:158:-
smaw_01_12433455	C01	12433455	171	-	C	A	TGAAAACATATTTTAAAACGGAACCTACCTTTTGCATAGCTCTGCATTTTTGCAGGCACCATCCATGACAAGCATTTCATTCAAANNNNNNNNNNNNNNNNNNNNNNNNNNNNNNNNNNNNNNNNNNNNNNNNNNNNNNNNNNNNNNNNNNNNNNNNNNNNATTGCTGGTGGCCTGTAGTCGGCAGCGGGAGGGTGTCTCATTTCAAAGGGCATGAGGAGAGAAAGATTTGTGGGAGCCTCAAAGCC	10051:171:-
smaw_01_12436553	C01	12436553	305	-	C	T	TGAGGTGTTATGGCCTCCGCAACGCGGTTTTCATGTGTTAATTCTATTCTCGGCAAGCGCATTCTCCACAGGCAGCTCTCCATTTNNNNNNNNNNNNNNNNNNNNNNNNNNNNNNNNNNNNNNNNNNNNNNNNNNNNNNNNNNNNNNNNNNNNNNNNNNNNNNNNNNNNNNNNNNNNNNNNNNNNNNNNNNNNNNNNNNNNNNNNNNNNNNNNNNNNNNNNNNNNNNNNNNNNNNNNNNNNNNNNNNNNNNNNNNNNNNCTCTTTAGGTCCGAGACTCGACTCCAAACACAATTATTGCTGGCCGAGCGCCACGGGCACTCCAGGCAGATGAGGACGATTGTTG	10052:305:-
smaw_01_12459675	C01	12459675	27	+	C	T	GATCTTGTAACTGATCTCCTGGCTGCCGTAGAAACAGGTCTTTCTTGGACATGGTGTGTGTGTATGTGTGTGTGCGTGTGTGTGGNNNNNNNNNNNNNNNNNNNNNNNNNNNNNNNNNNNNNNNNNNNNNNNNNNNNNNNNNNNNNNNNNNNNNNNNTGTAACTGAATAGGCAGATTCTAACTTTCACCAAAAGGAGGGTGGGGGGCAAGACAAGACGACACCCCAGCATCCTCGTCTGCAT	10064:27:+
smaw_01_12490148	C01	12490148	1	-	C	T	GTCCCATAAGACTCGACGGGGAGAGGCGAGGCGCAGGCCGCATTAGCTCGTTGAGATGAAGTATGCATGACAACGCTTTCATCAGNNNNNNNNNNNNNNNNNNNNNNNNNNNNNNNNNNNNNNNNNNNNNNNNNNNNNNNNNNNNNNNNNNNNNNNNNNNNNNNNNNNNNNNNNNNNNNNNNNNNNNNNNNNNNNNNNNNNNNNNNNNNNNNNNNNNNNNNNNNNNNNNNNNNNNNNNNNNNNNNNNNNNNNNNNNNNNNNNNNNNNNNNNNNNNNNAGTTGAGTGTGTGCAGCGGAGGCCGAGGTACGACGGAGGACATCTGCTGCTGTATTAGCGCCCGCCTCGGGATCAAACTGGCTCC	10086:1:-
smaw_01_12533081	C01	12533081	232	+	C	G	TCTGAACGGTGCCAGCAGCAATGTCTTGAGAACATCATGAGACAGGAAATAAAACAGGGGGGCAAAAGGATAAACAAGTTTTTTTNNNNNNNNNNNNNNNNNNNNNNNNNNNNNNNNNNNNNNNNNNNNNNNNNNNNNNNNNNNNNNNNNNNNNNNNNNNNNNNNNNNNNNNNNNNNNNNNNNNNNNNNNNNNNNNNNNNNNNNNNNNNNNNNNNNNGGTTGGCAGCCGCACGCCAGTTGTTTTGTTTACCTTCCCTTCGGTATCCAAGAGACGCGTTGTCAGAGGTCTTTAGCAAAACCAATCTCCTA	10108:232:+
smaw_01_12589344	C01	12589344	213	-	C	G	CAACCACGGCGACGGCAGCGGCGGCGGCCGCGCAAGTGGAGAAAGTTCCAGGCAGGTGGGCAAATCTGTAAAGCGCTGGAGCCGANNNNNNNNNNNNNNNNNNNNNNNNNNNNNNNNNNNNNNNNNNNNNNNNNNTAATCCTGACAAGCAGACTGCCATTAGGGAAGCCGCACCTCCGACCTCCTCCCATAGTCCACTTCCCTGCCCCATGTGCGTGTGTGTGT	10151:213:-
smaw_01_12600828	C01	12600828	39	+	T	G	GTCAAGCATGGAAGAGCAGGTGATTAATGCCAACACAGTGTTTCCCTGTTCGTGGCCAAAGTGTTATTGATTTGATTTCAGAGGGNNNNNNNNNNNNNNNNNNNNNNNNNNNNNNNNNNNNNNNNNNNNNNNNNNNNNNNNNNNNNTAATGCCTCCCTGCTTGGTAGGAGCCACCGAAGCGGTCAACCAGGAAATGGAGACAATCCCCAGCCAGGCGCCAAGCGACGTTCTGTCTTTTACACTGCGGATATGTGTGA	10158:39:+
smaw_01_12605693	C01	12605693	237	+	G	A	CTCCGTTGTTGATAGCGTTGCTGCCAGCTTGGAGTCAGATCACAGGGCTGGAGATGCTTCAGTCTGGGCTCTACCTCTTGGCCAANNNNNNNNNNNNNNNNNNNNNNNNNNNNNNNNNNNNNNNNNNNNNNNNNNNNNNNNNNNNNNNNNNNNNNNNNNNNNNNNAGTCAAAATCCTTCTCTGTATCAACTCTTTGTTTGCCTCTTTCTTTCCCCGTGTTGATTCCTCTCACGGAGGTTTCGATACACCC	10160:237:+
smaw_01_12622183	C01	12622183	70	+	T	C	TTATTCCGTCAGAGCGGTGATAAACAAGATTAGTGATTACAGCTCTGAAGCATTTTGCGAATGTGTCACTTCCATCTCTTTGCCANNNNNNNNNNNNNNNNNNNNNNNNNNNNNNNNNNNNNNNNNNNNNNNNNNNNNNNNNNNNNNNNNNNNNNNNNNNNNNTGGTGTCCCACAAATAGAGTGTGTATAATATTGATGACCGCGATATGTGCCGTTTAATCAGCACTATCGACCCGCTCGGCACCGTT	10174:70:+
smaw_01_12638598	C01	12638598	219	+	A	G	TGTTGAAAAGCACAAGGGAGTTGACAGTTTCCACTGAGGGGGAGCGGCAGGTAAAGGCTGCCTGGAAGCTAATTAGGGGCCATATNNNNNNNNNNNNNNNNNNNNNNNNNNNNNNNNNNNNNNNNNNNNNNNNNNNNNNNNCTCGGCTGCTTGTTGCTGTGACAGGCCAGATAAAGTGGTATTTACCTTTCAGCCGTTTCTTTTACAGCCCGCGCTGCATGTATGTACAGTGTGTTTGCC	10184:219:+
smaw_01_12657823	C01	12657823	246	-	G	A	CGCTCCGCTCTTGACAAGCGGTTGGTTGAAATACCCACCGAGACCTGTCGCCCTGCCGCCCCCCTCCTCCCTCCCTTCCACCACCNNNNNNNNNNNNNNNNNNNNNNNNNNNNNNNNNNNNNNNNNNNNNNNNNNNNNNNNNNNNNNNNNNNNNNNNNNNNNNNNNNNNNNNNNNNNNNNNNNNNNNNNNNNNNNNNNNNAATGCCTGAAAATACAATTAAAAACCTGTGACCCAGATCGCGGTGCTGACCGTAGCGTAACGACGGCCATCCCTCGTGGCGACGT	10207:246:-
smaw_01_12673136	C01	12673136	188	-	T	C	TACGACGCGCACAGGCTTTTGCTTTGAGACTGCCTGTCATCACATATATCAGGAGATTATGGCGCTTTGCTCTCTCACTCTCTGTNNNNNNNNNNNNNNNNNNNNNNNNNNNNNNNNNNNNNNNNNNNNNNNNNNNNNNNNNNNNNNNNNNNNCGGAGCCAGAGATAATCTTCGGCATTTCAAACACAGAGGCACAATCGCGTCATCGTGCAGCAGGCCTCTCCGCTGAGTTGGCCTGCCGTGTACTTGAACGCTCAGATAATGCC	10218:188:-
smaw_01_12725464	C01	12725464	12	+	C	T	TGTTCAGGTTACGTAAGTCTATCTGAAGGTCTTAGGCCGCGTGTGTTCGGACCTGGCATTACCGCGCGCCTCTGATGGCGAGTGANNNNNNNNNNNNNNNNNNNNNNNNNNNNNNNNNNNNNNNNNNNNNNNNNNNNNNNNNNNNNNNNNNNNNNNNNNNNNNNNNNNNNNNNNNNNNNNNNNNNNNNNNNNNNNNNNNCAGGAAACAGTGAGAAGTCTATAAATACTTTTTTGTTCATTGTGAAACTGGGGCGGGGTCAGGGGACGTCAGCTGAGGAGACAGTC	10247:12:+
smaw_01_12811449	C01	12811449	54	+	C	T	AACATTATAGGGCCTTTTTCTTCCTATAGAAAGACCAGGCGCCCAGTTCACCACGATCACTCTTTGTCCCGTTTGAATGTGGTTGNNNNNNNNNNNNNNNNNNNNNNNNNNNNNNNNNNNNNNNNNNNNNNNNNNNNNNNNNNNNNNNTACCTCCTGCTGGAAGCAGCCGTCCCTCCCCTCAGACCACAGATAACAAAAGTTGTCCAAGGTAAATAGGGGGAGAACGGCGGGCCAGTAAATCCCACCGGCGGT	10288:54:+
smaw_01_12848091	C01	12848091	193	+	C	T	GTCCAGTGATATCCTAAATTAAGTATATAACAAAGAGCAAATTTTTGAATCAGTGTTTCTGTGGTAGGAGGTTTGCCCGTGCTATNNNNNNNNNNNNNNNNNNNNNNNNNNNNNNNNNNNNNNNNNNNNNNNNNNNNNNNNNNNNNNNNNNNNNNNNTGCCGCGCCAAGCAGTCTTGCCGTACAGCCGCAGTCTGAACAGCACGCAGGAAGGTGTGCACAGGCCTCACCATTTCCACCTGAT	10322:193:+
smaw_01_12876184	C01	12876184	57	-	A	G	ACTGGGACCAGTATGACAAGGGCAGTGGGAAGGACAGCTAAACACACACACACACATACACACACACACACACCAACACACGCCCNNNNNNNNNNNNNNNNNNNNNNNNNNNNNNNNNNNNNNNNNNNNNTGTACACTTGCAAGGTTTAGAGACAGAAAAGCGTCAAAATACAAGTGGCAGTACCTCCCCTAATGACGGCTATACAACTGTGCGA	10336:57:-
smaw_01_12886538	C01	12886538	276	-	T	G	GAAATGATGTGTAGACTTCTCCAACCACAAGACCACGAAGCCGAACCCGAGGTCAACACATAGGCCAAAAAAATCCACCTAGATCNNNNNNNNNNNNNNNNNNNNNNNNNNNNNNNNNNNNNNNNNNNNNNNNNNNNNNNNNNNNNNNNNNNNNNNNNNNNNNNNNNNNNNNNNNNNNNNNNNNNNNNNNNNNNNNNNNNNNNNNNNNNNNNNNNNCCACCGCTCTGGTGTCTGCCTCTCATCCGTCGACTCATCAGAGGAGAGGCAGACGTCTCAGTCTCCCCTGTAATTAAACGCGGAAAAGGAGTCGTCGCAGCGGGGAGCTGCG	10352:276:-
smaw_01_12931770	C01	12931770	249	+	G	A	GGCTGTAGGAACCAGCAACGGCCCTCGCATGCCTCAGTTTGATCCCATAACAGATTGATACACCAAATAGGAGCTGACAAGCATTNNNNNNNNNNNNNNNNNNNNNNNNNNNNNNNNNNNNNNNNNNNNNNNNNNNNNNNNNNNNNNNNNNNNNNNNNNNNNNNNNNNNNNNNNNNNNNNNNNNNNNNATCAGGGTCAAAATCCTGGCTCCGCGCTCTGAGGGCCACTTAATAAATTGAGGAGGGCACGTTGACAGTCAGATTTTCATGGCGTG	10377:249:+
smaw_01_12934744	C01	12934744	202	-	G	C	GCACATGTTCAAATGATGAAGGGGGGGATTTACAGTTTCTATAACATTCTCTGGAGACCTGAGCCCTGTCCCACCCCACCGACTANNNNNNNNNNNNNNNNNNNNNNNNNNNNNNNNNNNNNNNNNNNNNNNNNNNNACCCCAACCACCCATCCCGTGCCCAAATTAGACTGAGCCTCCTCTGACTGATTCGATGTAGAGGCAGCACATTAATTACAATATG	10381:202:-
smaw_01_12943835	C01	12943835	161	-	A	T	TTTCTGCGGGGGTCAGGGGTCAGGCACCCCCCAGCCCCCCCACTCGAGAAGAAGACAGATGAGGTCGGGTACGGCGGCCAGACACNNNNNNNNNNNNNNNNNNNNNNCTTTATGCCCAAAGCAATCTGATACCTGATTGGCTCTCAGAGGAACCAGGGTTTGATGGCACATGATTAACACCGACCGCCGCGACACAACCCGACACCGGCGCT	10388:161:-
smaw_01_12957899	C01	12957899	161	-	C	T	AGTCGCTCTTCAAATATATGTAATGAGCTGGCGGTGTTGGGGCGGCGCTAGACGGCATGGTGGCGCTGCGGCTGTGATTGGCTCGNNNNNNNNNNCGTACCCAGAGGAGGCTCCCTTAAGAGCAGATCTCCTGTTAAGTATGAGATCCCTGAGAGGAGAAGTGTTGGAAGGACTCTGGTTTCTTTAAATNNNNNNNNNNNNNNNNNNNNNNNNNNNNNNNNNNNNNNNNNNNNNNNNNNNNNNNNNNNNNNNNNNNNNNNNNNNNNNNNNNNNNNNNNNNNNNNNNNNNNNNNNNNNNNNNNNNNNNGTGTGGGGGGAAAATAGCGGCTTTATTTAGAAATCCTCAGGTGGACAACATTTACATTTTAGATTGTATTCCCTCTGGGACTCTC	10400:161:-
smaw_01_12986368	C01	12986368	5	-	C	T	TCACGTGGGAACTTGTTGAAACGCAGCTACAGTGAGTGTGCAGCACAACAGATGCGTCAACGTTCAACACTGTCATTGACACTGTNNNNNNNNNNNNNNNNNNNNNNNNNNNNNNNNNNNNNNNNNNNNNNNNNNNNNNNNNNNNNNNNNNNNNNNNTGTTCGTCAGATATCGGTCGACCTGCGAGATGAGATGAAACAGTTTGGACGCCGCTTGACCTGCAAAGGGAAAAAGGCTGCGAGGA	10422:5:-
smaw_01_13000595	C01	13000595	67	-	T	C	CAGGTAATATTGAGACCAAATACTGGGACCAAATGGAGAGTAACATTTCCCAATGCGCACCTGACAACTGAGAGCAGACACTTCTNNNNNNNNNNNNNNNNNNNNNNNNNNNNNNNNNNNNNNNNNNNNNNNNNNNNNNNNNNNNNNNNNNNNNNNNNNNNNNNNNNNNNNNNNNNNNNNNNNNNNNNNNNNNNNNNNNNNNNNNATAGCTCTGTGTCGCACAACATTTGAATGGACCATCTGACTAATTGCAGCCGCGTGCGAACAAATCAGGCTCCACAGAACCTGTGAAGACCCT	10430:67:-
smaw_01_13010329	C01	13010329	147	-	C	T	AATGTGATGGAGGAACCAGGTTGGGTTTCATGAGCAGGTGTCGGCCGTTTTTCTCCCTCGCGTTTCTCACACTGTTTCACCACCTNNNNNNNNNNNNNNNNNNNNNNNNNNNNNNTTCTTTCCCCCGCCCTCCTGCCTTCCTGAGCGCGGAAAACAGGTTTACCTCTGAATATGACTGTCTGGGGGGAAAACGATGATCA	10438:147:-
smaw_01_13020118	C01	13020118	301	-	A	G	AGGTCAAACATTAGTTTTAGGATCCGCAGGCTTTTATTTTGATTTGTAAATCAACTGGCTCCAGCTCATTCCTAAACTGGCCACANNNNNNNNNNNNNNNNNNNNNNNNNNNNNNNNNNNNNNNNNNNNNNNNNNNNNNNNTGCACGCATAAAGACAACATGGCAAAACAAGCCGTAGTTTTAAAGTCAAAGGTTGTTTTATTCATGCAATTTCAAGACGCAGACANNNCAGCAGTAGTCGAGCGAGGAGAGATAATGCTGTATAGAGCAGTAGGAGAACATCAGTTGGGTGAGAAATCGTTGAACAGTAACCA	10451:301:-
smaw_01_13022445	C01	13022445	64	+	G	A	GCTGAGGGATTCGAGCCACCCACACTGAAACCAATGGCACTCTGGGAACTCTGAGGCGCTCGAGTAGATGCCCCAAAGTTTGGCGNNNNNNNNNNNNNNNNNNNNNNNNNNNNNNNNNNNNNNNNNNNNNNNNNNNNNNNNNNNNNNNNNNNNNNNNNNNNNNNNNNNNNNNNNNNNNNNNNNNNNNNNNNNNNNNNNNNNGGTTACAGTTTGCTTTTAGGACATGTATCCAACCCCACGACCCTGGCTTGGATCCTGATCCCAGATCCCTTCAGCAGCAACAAGCGGTCGTGGCCTCCA	10455:64:+
smaw_01_13039116	C01	13039116	53	+	T	C	GAAACGGGGATGGAATCAATTTCACTCTCATCCACTTGGCTCTGGCTACTTATGTAAGTTCCTATTTAATTCTAAACACAGCCCANNNNNNNNNNNNNNNNNNNNNNNNNNNNNNNNNNNNNNNNNNNNNNNNNNNNNNNNNNNNNNNNNNNCAAAGTTTGGAACTCCGACGTGTGTGTGACGTGGAACTCCGACCACAGTGAGGTAGTTGAGGTCAGGGCCATGGTAAGCCAGAACNNNNNCCAGGGCCCGGAAGGTGAGCGGGAACAGCCGCATGAGGGGGAGGATGACGAGGAGATGGGTGGCGGCAGCAGCAGCTCAACTGAC	10461:53:+
smaw_01_13103341	C01	13103341	160	-	C	A	ACATGTTGAAGGCTTTGTCGTCTTCTGTGTACTCCGTACTGTACAGGGCGGAGTAGAAATCCACGGCTCTCTCTCTTATCTGCGANNNNNNNNNNNNNNNNNNNNNNNNNNNNNNNNGCAGAGCGTGGATCATTCTGCTCTTTCCATTCTTCTTCTCCAGGCTGAAAAAAAACTTGGTCGGAGAGTCCATTAGTGCAGCGCT	10486:160:-
smaw_01_13143205	C01	13143205	29	-	T	A	ATGCTTGCTGCTACACAGATATTTTCCAATAGCCTGGCTGATGCTTAGCATTGGCGTTATCCAGCTTGGCGCTGGGTTCCGTTTTNNNNNNNNNNNNNNNCTAGCATGCTGCTGGCTAGATACAGGGAGCATTATTGAGAATGGAGCCATCAGCGCCAAGTCTAACTGTATTTCCATTTGTTGCAATAAATGGTTAAATCTATGACGAGAGTGTTCCTGACTGAACACACTTTGGACAACAGACTGCGCATTTGGCACTGTATGCA	10509:29:-
smaw_01_13148469	C01	13148469	206	-	G	A	TTTCTGCTCTTCTCTCTCCAAACACTTCTCCAGTTGCCCCAATTGATTTAAACTAAAACTTCCCCCTAATGGAAATCCCGAAGTTNNNNNNNNNNNNNNNNNNNNNNNNNNNNNNNNNNNNNNNNNNNNNNNNNNNNNNNNNNNNNNNNNNNNNNNNNNNNNNNNNNNNNNNNNNNNNNNNNNNCTCACAAGAAGGTTCTGGGTTCGAATCCTGGTTCAAACCAACCAGGGCCTTTCTGTGTGGAGTTTGCATGTTCTCCCCGTGTATG	10517:206:-
smaw_01_13161080	C01	13161080	123	-	A	G	CAATGATGGACGCACTCATGGTGAGGATGGTGCTGCTTTAAAGAGCTCATTTGCCAGTTCAGGCAGGAATTCGGGCTCGTCCGCCNNNNNNNNNNNNNAGTGAACCGTTGTTGATTGAGGCCTTGGTCTGGAAAGCGCACTGGTGCGACTTCTCAACGAGCTTCAACGTCACATGGTCCTTGTTGTTGGGCAGGACCGGGCATATCCCGCCAAAGACGGTGTGTTTCACCCCGAAAACTGCCGCCAAGCCGGGATCCAGAAGG	10528:123:-
smaw_01_13163631	C01	13163631	17	-	A	G	AGCTACTGTTTGGTGATAGTTCAGCTACTTCTCTCAGAAAGCTGTGAAAACCTAGGTAGCGTTCGGCCAACGAGTGGTTAGCTCANNNNNNNNNNNNNNNNNNNNNNNNNNNNNNNNNNNNNNNNNNNNNNNNNNNNNNNNNNNNNNNNNNNNNNNNNNNNNNNGTGACATCCAGCTCTTATAGTAGGGGGAATTCCCTCCTCTAGGGAGCCAACGTCGCGTCTGTCTACCAGTCAGGACTGGTGTAGT	10532:17:-
smaw_01_13176271	C01	13176271	167	-	C	T	TCTGACCTTCCTCCTTTCCGTGCGGGTGTGAACTGTGAGCGCCGACATGGCCTCTGCACGCCTTTTGCAGGGTCTGGCACATAGTNNNNNNNNNNNNNNNNNNNACAGAACGTTGTTTGAGGGGAGCGAAGCAAGAGTTTGGCTGAGCCAACGTCCTCCCCCGAACGCAGCGCTCTAGGTAGCGTGTCTG	10545:167:-
smaw_01_13201511	C01	13201511	240	-	C	A	GCATGCAGGGACAACGGGCTCCTGGCATTGATGGCCTAAGGGTAGAATTGTATAAAGCCTTCTGGGACATCTTCGCTAAAGATGTNNNNNNNNNNNNNNNNNNNNNNNNNNNNNNNNNNNNNNNNNNNNNNNNNNNNNNNNNNNNNNNNNNNNNNNNNNNNNNNNNNNNNNNNNNNNNNNAAAAACTGGCACCCTGTATCATTGCTCTGTGTGGATTACAAACTTCTGTCAAAGGTATCGGCCTCTAGGCTGGGGAAGGTTATGGA	10557:240:-
smaw_01_13301886	C01	13301886	209	+	C	T	CACAAGGAGAATGGTCACCGCACATCATCCATGTGACTGACAGTTTATGGCCACTGTGTAATGAGAGACTGATGAGGCTGTGTATNNNNNNNNNNNNNNNNNNNNNNNNNNNNNNNNNNNNNNNNNNNNNNNNNNNNNNNNNNNNNNNNNNNNNNNNNNNNNNNNNNNNNNNNNNNNNNNNNNNNNNNNNNNNNNNNNNGAGAGGTCTCTTTACTACAGCTGGTGAGGTAACAGCAGTTACTGACGGAGGAGTCGAGCCTTCATTGCCTCCGTCATCGCGCAAATTAGAGCGTTCACCCGGGTGTGACGTTCACATCAATGCCGATCGTAGGTGAA	10601:209:+
smaw_01_13324608	C01	13324608	2	+	C	T	ACGGAGTGCTTAGCGATGCCAGCCACATCCAACCCGAGACATTTTTCCATAGCTCTGTGGAGGGAGCGGCCCATTTGTAATGAGTNNNNNNNNNNNNNNNNNNNNNNNAGAGCACGACACAGAGAAGCAGAGAGAGACAGAGCAAAAAGATGGAGTGGGACGGAACTGGATGAAGTATCAAGGAGCGGATTGCAGGATTGCGTCANNNNNNNNNNNNNNNNNNAAATCAATTCTGGACGAAAATGAGAAAGATTGATTTGGGAGTGAAACAAAGGGAATAGTGACAAGGGCAGGTGGTGGTGAGAAAG	10614:2:+
smaw_01_13337721	C01	13337721	35	-	A	C	TTCTCTTTTCACCCTCTGTCTAAAACGCCTGGATTTATTTAATCCCCGCCTCCCGATAAACCCCAGTCTGCTCTGATTCGCCAGCNNNNNNNNNNNNNNNNNNNNNNNNNNNNNNNNNNNNNNNNNNNNNNNNNNNNNNNNNNNNNNNCCCAGAGAAGTGGACATACTCAGATCACAGGTAGGGTTACCCCAGAAGGGTCCAACTGTGACATCACAGTGGGAGAGAAATCTGAACT	10623:35:-
smaw_01_13339997	C01	13339997	207	-	G	C	GTGCCTTGGAGCACAAACAGGAGGCCTTTTCCATCTGTTGAGGCACATTCGGCTTTACCTGTTTGAACACCATTGAACAGAAATCNNNNNNNNNNNNNNNNNNNNNNNNNNNNNNNNNNNNNNNNNNNNNNNNNNNNNNNNNNNNNNNNNNNNNNNNNNNNNNNNNNNNNNNNNNNNNNNNNNNNNNGCTCACACATTCAGCGGGACAATGGCCTGAAATTCAACTTCCCAGTGGCCAAAGTGAAGGTAATATTCCTTGGTGTATTTATGCATACGTTTATTTCCCGGCGAACGTGTGGGCGGGAGTGCGTCTGTGCATATGGGGTT	10624:207:-
smaw_01_13341949	C01	13341949	230	-	A	G	ATCAATCCATCTTGATCACTGCCTGTTGCTGGCCTTTGAGTCCCTACTCCCCTCCCCGCCTCACACCATCTGTCTCCTCTTTTTTNNNNNNNNNNNNNNNNNNNNNNNNNNNNNNNNNNNNNNNNNNNNNNNNNNNNNNNNNNNNNNNNNNNNNNNNNNNNNNNNNNNNNNNNNNNNNNNNNNNNNNNNNCTCGCTCGCGGTATTCAAACATACACACCGCACCCGCCGTATGTAATGTGCATCTTACCGCGGATCAGCTGATGATTGGAGTGTGGATCCACCGACGCCGGCCGCGCCTGACTCACAGCAGCACGTCAGTCCTGTCG	10627:230:-
smaw_01_13372898	C01	13372898	169	+	C	T	AGTGAAACTGGGTCTCGATGTGCTATGCAAGCACTCCAGCGACGCCGCGATGTAAATAAGTGTTGGGTAACAAGGAGGAGGAATANNNNNNNGCCAAACCGCGAGGCAGGATTCAGCCTTGGGGGAAATCACAGCTCCAAGCAGTGTTCGCCATCCGACAGAGAGAGGCCCTCAGAT	10652:169:+
smaw_01_13403746	C01	13403746	231	-	G	A	CTCTCATTTATCGGAGTGGGAGTGTCGGGTGTAGAACAACACAACGTAAACATCATCTGGCGTAATGACAGCGCGTCTCCCTCCCNNNNNNNNNNNNNNNNNNNNNNNNNNNNNNNNNNNNNNNNNNNNNNNNNNNNNNNNNNNNNNNNNNNNNNNNNNNNNNNNNNNNAGGTAAAATGCAACCAGCGTTCTGATGCTGCACGGCCAAAACAGAAAATCTTCAGACATCACGCGTCAGTTTCAGGGCAACCTTTTTTCTCTGCTCCCTCCCGGGGCTTGGCGTGCAGGCCGAT	10670:231:-
smaw_01_13415544	C01	13415544	47	+	G	A	TACAATACGTCGCACCCAATGACGAAACTCTGAAGAACACAATGACGAAACTCTGAATGAAGTTGTGAGTGAGCACAGTAACGGTNNNNNNNNNNNNNNNNNNNNNNNNNNNNNNNNNNNNNNNNNNNNNNNNNNNNNNNNNNNNNNNNNNNNNNTCCCATATAAAAGAGTCATGGCTGCTTCAAGTTCAGTCTCTTGACCTGAACAGAGGTGTTGAGCTGACGAGGCAGGCGTGAAGCAGNNNNNNNNNNNNNNNNNNNNNNNNNNNNNNNNNNNNNNNNNNNNNNNNNNNNNNNNNNNNNNNNNNNNNNNNNNNNNNNNNNAGAGCTCATGTTTCTACTGTCAATACAATGTCCCGCTCAGTGAATAATCTGGGACACAGCTCTTCAATAAACACGT…	10687:47:+
smaw_01_13428114	C01	13428114	258	-	G	C	CGGAGGTTTTATTTACATACAGAACATCTGAACTGAATATGCATTAGGAATCTATTTAACCATTTTCAGCTAATTACAAACACAANNNNNNNNNNNNNNNNNNNNNNNNNNNNNNNNNNNNNNNNNNNNNNNNNNNNNNNNNNNNNNNNNNNNNNNNNNNNNNNNNNNNNNNNNNNNNNNNNNNNNNNNNNNNNNNNAGGTGACTCTCTCCGAGCTGTGCGTGTGCTCACCGTTACGGAGACTCCGCTGTCGCAAGCCGCTCTCGCATTTGCCGTATACCAA	10695:258:-
smaw_01_13428399	C01	13428399	20	+	C	A	AGAGACGTTGGGCCACAGACCCGCCATCTTTGCCTTCCTCCTCCTCCTCCTCCTCCTCCTCACGGCATCCACAGATGGCGTCTTGNNNNNNNNNNNNNNNNNNNNNNNNNNNNNNNNNNNNNNNNNNNNNNNNNNNNNGTACTCCAGTTGAGCGGCAGCAAGCGTTTGCGCGGACCAATGCGAAAAACAATGGAGTGCATCTCGCCCACCACGTCTCCCCTAGTCATTAAGTCGCCCACCTCACGGCTCCGACACAGAACGAGTCCCATTACTTGGCCTCTCTGAAT	10696:20:+
smaw_01_13450857	C01	13450857	212	-	G	T	GACATCCATCAGATTTGCTTATCAAAGACTTATGACACATATACAGTGTATGTACTGAAGGCAGGGTGTTGAACTGTTGAACTGTNNNNNNNNNNCGCACAGTTGTGACCTGCTGCTCTGCCTGCTCCTGTGCTGCCGACTGCTATAAACGATAAACGAAGTAATGAGACCACAGTTTCCACATTACCTCCTGCGCCGTATGCATTTTCAGCAAACCATTAATGCTAATAGAGATGTCCTGTTATCAG	10714:212:-
smaw_01_13457708	C01	13457708	106	+	C	T	GTCAAACTGTCTCACTCACCTGTCGCGGTTTGGTGAAGTGGGTAGGGTGCCCGTGGGCATGGGCATGGGCATGTCTGTTTGCACTNNNNNNNNNNTGGCCATTTCCAGGGTGGTGAGGACGTCCGTGGGGCATCGCGGCAGGATGACGCTGCTCATTGGTCCGCTTTTGCACATGCAGGTTNNNNNNNNNNNNNNNNNNNNNNNNNNNNNNNNNNNNNNNNNNNNNGCCTCTAGCTGGAGATTTGCGCTGAGTGCGCTCTCTGGGGAGGGTCTGGAACTGCGCGATGGGTAGCACAGGAGGAGGAGTCGGCGCATGCTGAGCCCCGGCAGCAGGAGCT	10724:106:+
smaw_01_13519485	C01	13519485	58	-	C	A	TGGTTGCTTAGTTAAAGAAAATACTATGAACGTGAAACAACAATGGTGAAAACTAAAGGCAGGGGTTTATTTTCTTGGACCCGACNNNNNNNNNNNNNNNNNNNNNNNNNNNNNNNNNNNNNNNNNNNNNNNNNNNNNNNNNNNNNNNNNNNNNNNNNNNNNNNNNNNNNNNNNNNNNNNNNNNNNNNNNNNNNNNNNTTTCCAAACGTCCATACTGCAACGCAGCCAGGGAGTTTTCAAACTCAAGAGGCCAGCAGCGTTTTTCAAACTTCTCCATTCTAGG	10769:58:-
smaw_01_13545098	C01	13545098	234	-	G	A	AGCTGTGCCCAAATCACTGGACTGGACACAGTCGAAATGAATGAATGAAAATGAATCTAATTTTACATTACATTACATTCATTTANNNNNNNNNNNNNNNNNNNNNNNNNNNNNNNNNNNNNNNNNNNNNNNNNNNNNNNNNNNNNNNNNNNNNNNNNNNNNNNNNNNNNNNNNNNNNNNNNNNNNNNNTTAAATTACCATTGAGAAGACCCATACACTTGTTTACACACGAACGGCGTTGACGTCTGTCCCGCCACGTCAGCCCTGCTCTAAC	10781:234:-
smaw_01_13558308	C01	13558308	23	+	T	C	CTTTCAGGTGAGTGCTGGTGTCTCACTGTCTCTGCATGAAAAATCATACAAGAAAAGGTTTTTGACATGAGCATTAAGACGGGGTNNNNNNNNNNNNNNNNNNNNNNNNNNNNNNNNNNNNNNNNNNNNNNNNNNNNNNNNNNNNNNNNNNNNNNNNNNNNNNNNNNNNNNNNNNNNNNNNNNNNNNNNNNNNNNNNNNNNNGATTTGCATCAGTAACATCTCATCTCATCTTCAACCGCTTATCCAGGGTCGGGTCGCGGGGGCAGCAGCTCCAGCAGGGGACCCCA	10785:23:+
smaw_01_13578370	C01	13578370	70	-	T	C	TTAGAACCAGGCTGATTTTGGTGACGCATCACTGGTCAGCCAACAGGCGCTCTCTTCGTCGAGGGCTGCATCCTGTTTCCAGCACNNNNNNNNNNNNNNNNNNNNNNNNNNNNNNNNNNNNNNNNNNNNNNNNNNNNNNNNNNNNNNNNNNNNNNNNNNNNNNTTGTGGCGTGGGCAGAGGGGCACGTGGCGCCCAACGAGGTCTCAGCCTGTCACAGAGCATCACATCAGCCTGAGCAGAAATGCGCACCGT	10795:70:-
smaw_01_13604956	C01	13604956	283	-	G	A	CTGAAGGTAAGATGATGGCAGGATTGGCAGCAGCACCATGGCGACGCCCAGCTCCAGACACACACACATAGTACAGACTGGGGACNNNNNNNNNNNNNNNNNNNNNNNNNNNNNNNNNNNNNNNNNNNNNNNNNNNNNNNNNNNNNNNNNNNNNNNNNNNNNNNNNNNNNNNNNNNNNNNNNNNNNNNNNNNNNNNNNNNNNNNNNNAAATTCATAAATGACGTTGTTCCAGTGTTACTTACCACATGTAACGTTGGGTTTGACGACTGGTACCAGAGCGCACGTTACCGCAG	10813:283:-
smaw_01_13616013	C01	13616013	160	-	G	T	CATGCAACTCCCTCCAGCTTTAAATAAGCACAGTCTGAGCTGAGCTTCAGGGACCACGGCTCTTCCTGCCATCTGCTCTCTTCTGNNNNNNNNNNNNNNNNNNNNNNNNNNNNNNNNNNNNNNNNNNNNNNNNNNCTGTCTTTCTCTCAGGCATCCAGCCAGGTGAGGTGAGGACAAGGACAAGATCGGCATCTCCCCTATTTGTCCATCAACAAAACCA	10823:160:-
smaw_01_13646889	C01	13646889	9	+	C	T	GGGCTGCTCCGTTTATAGACTCAGTGGTCACCGTGTTCCTCTCATGTGGTTTCCCTGCGGGCCACTGTGGCAGTGAACTCTGGCGNNNNNNNNNNNNNNNNNNNNNNNNNNNNNNNNNNNNNNNNNNNNNNNNNNNNNNNNNNNNNNNNNNNNNNNNNNNNNNNNNNNNNNNNNNNNNNNNNNNNNNNNNNNNNNNNNNNNNNNNNNNNNTGGCGCGGGACGGTCTGTGAGTAGGCAACACACACATTCAGTCAGAGCGATTTTGGAGAAAGCTTGTTTCTCTCTTTGTTGTTGTTGT	10835:9:+
smaw_01_13697566	C01	13697566	8	+	G	A	GGGAGACGGCTTAGCGGTGGAAACGTGGGGTCAACTGCAAAACAAATTACCGTGGCATTAGCTCATCCCACCGTAGGCAACTGACNNNNNNNNNNNNNNNNNNNNNNNNNNNNNNNNNNNNNNNNNNNNNNNNNNNNNNNNNNNNNNNNNNNNNNNNNNNNNNNNNNNNNNNNNNNNNNNNNNNNNNNNNNNNNNNNNNNNNNNNNNNNNNNNNNNNNNNNNNNNNNNNNNNNNNNNNNNNNNNNNNAAGGACCCGCAGAGTCCTTTTGTTGAGGACGAGTGTTCGGCGTTGACTTGCAATTAAAGTCCACTATTGAAACCGATCAGACATT	10867:8:+
smaw_01_13709103	C01	13709103	210	-	G	A	GGGCAAGGCCATCCCTGGACCTTTCATCTTTCATCATCCATTTTCTTCATCTGTAGTAACACACACACACACACTAACCCACACANNNNNNNNNNNNNNNNNNNNNNNNNNNNNNNNNNNNNNNNNNNNNNNNNNNNNNNNNNNNNNNNNNNNNNNNNNNNNNNNNNNNNNNNNNNNNNNNNNNNNNNNNNNNNNNNNNTCACAGAAGGCTTCAAATCACTCTCTCCTTCTTGTTGTCACAGAGCGAATCAGAGAAAGAGTGTAGATAATATTGTGAAAGTTTGC	10874:210:-
smaw_01_13720545	C01	13720545	244	-	C	T	CACAAGGAGAATGGGCTCTGCACATCATCCAGTTACCAAGTTTATGGCCACTGTGTAATGAGAGACCGCCTGATGAGGCCGTGTGNNNNNNNNNNNNNNNNNNNNNNNNNNNNNNNNNNNNNNNNNNNNNNNNNNNNNNNNNNNNNNNNNNNNNNNNNNNNNNNNNNNNNNNNNNNNNNNNNNNNNNNNNNNCTACAAGCGAGAGGTGTCTTTACTACAGCTTGTGAGGTAACAGCAGTTACCGACGGAGGAGTCGAGCCTTCGTTGCCTCCATCATCACGCAAATTAGCGGGTTCACCCGGGTGTGACGTTCACATCAATGCCAATCGGGGGTGAA	10881:244:-
smaw_01_13760488	C01	13760488	226	-	G	C	AAGGAGCAAATCCCCATAGAGCCCCATGTTAAAATGCCCAACTTTACAGTATAATTAAACATGTTTACAGCCTGGTTCAAAAAATNNNNNNNNNNNNNNNNNNNNNNNNNNNNNNNNNNNNNNNNNNNNNNNNNNNNNNNNNNNNNNNNNNNNNNNNNNNNNNNNNNNNNNNNNNNNNNNNNNNNNNNNNNNNNNNNNNNNNNNNNNNNNNTGATTGACAGGTTACACTGCTGTTTGCTCGTCACTCGGTGGCAGCTAGCCGCTGGCAGCTAGCCGCTGGCAGCGTTAGCTATAACCAGAGCTAATCCCCGTTCACTGAATGGGACTTCTCGACCGCCGTGTCGGAGGCTTGCGGAGAACAT	10908:226:-
smaw_01_13767593	C01	13767593	15	+	T	C	TTCTCACAGAGCCATCCTCCACCAGTCTAGGATTTTCTCATTTGCCCTTCATATGGGAATGTTTTTTTTTCCTTTTCTCATTTCCNNNNNNNNNNNNNNNNNNNNNNNNNNNNNNNNNNNNNNNNNNNNNNNNNNNNNNNNNNNNNNNNNNNNNNNNNNNNNNNNNNNNNNNNNNNNNNNNNNNNNNAGGGGTCCTTTCATGTCTTTGGAAACCCTCTGCCAGCCATGAACAGAACACATAAATTCAGAAATACACGTGCGTGCACATACCCACTCATCACTCACCCGACTGTAATTCGTG	10916:15:+
smaw_01_13886914	C01	13886914	54	+	G	A	ACGAAGCGACACAGGATAAGACGCTCGCCGAATGACACCGAACACAAGCCGACGACTGAGACAGTTACAGATAAATCTGCACTCANNNNNNNNNNNNNNNNNNNNNNNNNNNNNNNTCAATGCAGGTTCAGAATATTTCAGGAGAGTGTTACAGACTCTCGATTCCTTTCCAGTAAAGGATGTTGTCGTTTTACGCTGTGATTG	10972:54:+
smaw_01_13895964	C01	13895964	28	+	T	C	CTGTTACCGTCCCCGAACGCCTCTCCCTCCCAAATGTACGTTTGATCCTGAGGGGTGTTGACGGATTTTTACATTTCCAACCCTTNNNNNNNNNNNNNNNNNNNNNNNNNNNNNNNNNNNNNNNNNNNNNNNNNNNNNNNNNNNNNNNNNNNNNNNNNNNNNNNNNNNNNNNNNNNNNNNNNNNNNNNNNNNNNNNNNNNNNNNNNNNNNNNNNNNTTTTGGAAAAACATTTTTATCATTTAAAGGTGACATATTATGCAAAAATCCCTTTTTTAGTGTTTGTGCACATAAATGCTTGTGTCTGTGGAGCCTGCCGGCCCACAAACTGTGTAAAAAGACCACCCTGTTGCTTTTTTGTGGGCTGGCT	10977:28:+
smaw_01_13926698	C01	13926698	59	-	C	T	CACAACATTACATCTTATAAAATCAGAAGTCCACCTCCACACCTGAGGTACATTAGCCGCGTGCTAACTGGACTCCGATCGTAACNNNNNNNNNNNNNNNNNNNNNNNNNCACCTCCGCACGCGAGAGACGCCGAGTTGGAAGTGGTAGACGGACTGTTGCTTGTGGGTCTGCGGCATCACTTTGCGATCTTGGCGCTACTGCCCACGCGAGCACCGTTTAACATGATGAGATCACCCAAACAACCGTACATTTCTACACAATGTTGCCACGTGATGACATCACACAGTCCGACCCTCAGT	10989:59:-
smaw_01_13992339	C01	13992339	177	+	G	C	GCACCTTCACCTCAGCTCTGTTGCCCTTCCAGCAGGATGTCACCTGGTTCAGAGATGGTAAATAGTATAACGGATGCACCACATGNNNNNNNNNNNNNNNNNNNNNNNNNNNNNNNNNNNNNNNNNNNNNNNNNNNNNNNNNNNNNNNNNNNNNNNNNNNNNNNNNNNCTGCATCAGTCCAGCGCTGTGGACATCAAGGCGGTCGACAATGAGGCCTCCATCACTTTGAGGGCTGCGCACAAGGAGCATGAAGG	11009:177:+
smaw_01_14005870	C01	14005870	22	+	C	A	AGCAGCAGAAGTTCACAACTGCTCACGGACGAGATAAGGGCCTTAAAGTCTAAGTGGTTGTGAATAGGAAGATCAATGAACGGATNNNNNNNNNNNNNNNNNNNNNNNNNNNNNNNNNNNNNNNNNNNNNNNNNNNNNNNNNNNNNNNNNNNNNGCAGCAGGAGCATGGCTAAGCCCATATCAAATGCCTGCTTTATTCAGGAGAAGAACTGCACGAGCAACTTCTGCTCCTGTGTGAAGTGACAGCTGATCCGGGTTTTCCTTGAAATCCGCCACAATGACAGTTTGACCTGAGTCATTTTGATTTATATGAAGGAATCAAGTTTGTA	11016:22:+
smaw_01_14033449	C01	14033449	46	+	T	C	GTTCCTGGTGGGTGGATGCTTTCAAAGGAGTCCCAGTTTGGGCATTGGCTTTAATCTGTTTTAAAAATGATCGAGAGTGGGTATCNNNNNNNNNNNNNNNNNNNNNNNNNNNNNNNNNNNNNNNNNNNNNTCATCTCCCTGTTGTCACAGGAGCCCAGTGGGAAGGACACCCAGTGGCTGGGGGGTTTGGGCAAAACGCTGGGCGATGGTGGCTCGNNNNNNNNNNNNNNNNNNNNNNNNNNNNNNNNNNNNNNNNNNNNNNNNGTGTTGAGGTGGGACACCGCGCCCTCCCAGTTGTGATCATAGTTGGTGGCAAAACGGACAGAGGCACCCTTCTCTGCAGACGCGG	11033:46:+
smaw_01_14048656	C01	14048656	47	+	C	T	GGTGAAGTAATGTAGATTTGTCCACAGCAGACATGACGTCCAGATACTAGCTATTATGCTCACCTTCACCCAGAAAGAGGCCCCCNNNNNNNNNNNNNNNNNNNNNNNNTCTGCTGTGGGTTTGCCAAGTGAAAGCAGTTTTGTATTTAGCGTCAGGTTTGCTTGTGGTGAGCGGGGTTGTGAGCAGGGCTGTG	11044:47:+
smaw_01_14054761	C01	14054761	25	+	C	A	GGTGAGGGGCGACGGGGAGCAAAGCTGTAAATTTGCGCCTATTCCTGGAAGACGACGATCCTGTCCGTGACTCATTCACCTTATTNNNNNNNNNNNNNNNNNNNNNNNNNNNNNNNNNATTTCACAGGTGCCTCGAGGAAGGACCAGCCCTCGTTCACACTGAGGCAGGTGAGCTACCTGTGCGAGCGCCTGCTCAAAGACCANNNNNNNNNNNNNNNNNNNNNNNNNNNNNNNNNNNNNNNNNNNAAACTTGCAGGTAAAAATCACCCTTGAAGTTAAGTAAATGAAAACTATGAAACCCCAGCACTTTAATACCAAGACTCACGATTCA	11045:25:+
smaw_01_14072212	C01	14072212	317	-	G	T	GGTTTTTAAAGCATCATGCCACATTAAAGGGGCAGTAAGTGATACTAAAGCAATACACGTTTTGTAAAGAAAAACAGCAAAGATTNNNNNNNNNNNNNNNNNNNNNNNNNNNNNNNNNNNNNNNNNNNNNNNNNNNNNNNNNNNNNNNNNNNNNNNNNNNNNNNNNNNNNNNNNNNNNNNNNNNNNNNNNNNNNNNNNNNNNNNNNNNNNNNNNNNNNNNNNTCGTAAACATCACTCGTTGACACCTTAAGAGACGTGCTAGCGGGTGGAGCTGCAACTCTGCGGTTTTGGCCTAGTGGTTAGTGCGTCGATCTCCCATACGCAAG	11056:317:-
smaw_01_14086015	C01	14086015	28	+	G	A	AGACTCACTGTTGACGTCGGGGCTCGTGCTGCGCTGCGTTTTATGTGGGGTGAGATTGTTGTTTATTCCATGAGAGAGCCATAGTNNNNNNNGGTCATTAAGTGGAGCTGAGAGAGCATTTTTGTTTTTTGTTGCTGTGTAAAGTTGAACATCTGCCAAGTGTATGCAGACGGGTCC	11065:28:+
smaw_01_14093785	C01	14093785	76	+	G	T	AGTGGGAGGAGCTGGATGAGGACAGGAGAGGGGGGCGAAGGGTAACGAAAGAGGGAGTCCGAGGCAGGGACAGGCGTCTCCCATANNNNNNNNNNNNNNNNNNNNNNNNNNNNNNNNNNNNNNNNNNNNNNNNNNNNNNNNNNNNNNNNNNNNNNCAGCGAGCAGAGGCCAGCGACAGTGCTGACAAAAGGAGCAGCGACAGATGCCATTATCTCAGCCTCATGCAGATACAATGGAGCTGGACAACACAGGCCCC	11069:76:+
smaw_01_14130190	C01	14130190	51	+	G	A	GGGCTGCCAGGGAAATAATAACAATGCTGCCTGTCCCACCAGCTTCATACGTCTGCATAAACTAATTAGACTTCGACGCTCTCATNNNNNNNNNNNNNNNNNNNNNNNNNNNNNNNNNNNNNNNNNNNNNNNNNNNNNNNNNNNNNNNNNNNNNNNNNNTCTGCACGTTTGACAGTCACCGTGGGCCTCCAATGCTCTATACGGTGAACGTCTTTTTGTGTGTTTAGTGTTGAGGGATATTTAGA	11093:51:+
smaw_01_14136297	C01	14136297	243	-	C	T	AGCGACAATCCAAAACATAAAGAGCGCAAGTTTGAAAAGAGACAGAGAGCGAGAGGGAGGGGAGGGGAGGGCGTAGGGGGGGTTANNNNNNNNNNNNNNNNNNNNNNNNNNNNNNNNNNNNNNNNNNNNNNNNNNNNNNNNNNNNNNNNNNNNNNNNNNNNNNNNACAGCTCAACTCATGCTGCTTTTGTGGAGTGACATTCTCAACTGCGCCGTCTGCGCAGAGCAGGCGAAGCAACGCGCGGCACAGC	11100:243:-
smaw_01_14152207	C01	14152207	223	-	C	A	TCACTAAATGCCCGCTTGAGGCTGGCTCCAAAAGCGAGTAAATCCTCGTAGAGCCCCATGTTAAAATGCCCAACTTTACAGCAGANNNNNNNNNNNNNNNNNNNNNNNNNNNNNNNNNNNNNNNNNNNNNNNNNNNNNNNNNNNNNNNNNNNNNNNNNNNNNNNNNNNNNNNNNNNNNNNNNNNNNNNNNNNNNNNNNNNNNNNNNNNNNNNNNGTTTGAAAGCCTGCATAATTATGGGTGTGGAAACTTGATTGACAGGTTACGCCGCTGTTTGTTAGCCGCTCGGTGGCAGCTAGCTGCTGGCAGCTAGCCGGTGGCAGCGCTCGGTGTCAC	11104:223:-
smaw_01_14176612	C01	14176612	26	+	G	T	AGTTAAGTATTTACAGGAACTTTTAGTAAATTTTACCATAAGTACAAACATGAGACAGGGACAGACGGATAGCAGAAAAGCAAAANNNNNNNNNNNNNNNNNNNNNNNNNNNNNNNNNNNNNNNNNNNNNNNNNNNNNNNCATGGCCTCTGTGGGCCTCTCAGGACAGTGCTAGCTCTCGCCATGAAGGCACTGTGTGAACTCCCGATCTGTCAGTTCCACTGTAC	11113:26:+
smaw_01_14186538	C01	14186538	288	-	T	C	GAGAGAGAGCGGCGGGAGGGGAGCGGAGGTCTGTGTGTTGCGTTGGAGTGGCAGCGGGGAGAAGGAACAGTCCAAGGATCCTCCTNNNNNNNNNNNNNNNNNNNNNNNNNNNNNNNNNNNNNNNNNNNNNNNNNNNNNNNNNNNNNNNNNNNNNNNNNNNNNNNNNNNNNNNNNNNNNNNNNNNNNNNCCCCAGTCTCCCCAACTCTCCTCCAGCAGGTTGATGTCTCCCTGCCTAGCTTTTGTCACTGATCACCCAGCCCCTATATGCCCTGATTACTGGCTGAGCAGCATTATGGATTGCTCTGAAGGACAGGAGGGACTCATCCGGCTGC	11120:288:-
smaw_01_14213181	C01	14213181	31	-	T	G	CCCCAAATTAGACTGATCTTCCAGCAGAGCACTGCCTTGTTGGTCGTGAACCTTAAGTTTCCTCCCTGTGGCCTCCACACACATCNNNNNNNNNNNNNNNNNNNNNNNNNNNNNNNNNNNNNNNNNNNNNNNNNNNNNNNNNNAACCTGTCTCTGTGCTTCGGCATACAGCCGACTGCTGAGCAGTTTACTTCAGCTTTGATATCAACAGCAGCAACAGCAGGACCTAA	11142:31:-
smaw_01_14214647	C01	14214647	54	-	T	A	TGAAAAGCATGCGCAAGTTTGGCTGGCATTAAGGACAGGAGGACAGGACAAAAACAGGAGAGGACGAGGAGGGAGCTTAATGAGGNNNNNNNNNNNNNNCCCGCGGGATGCTCGGCGGATGGCGAGGCGCATAGATCAGCGGCACTGTGGGAGAGTGGGGGATTTGTGGAGATGGCGCGTGGCCACGCCGCCGCGTACGAGACCGCGAGTCGTNNNNNNNNNNNNNNCTGGACATTGACAGGCATGTGTCACCCACTGAGCACCATCCAGATCACGGACGCCCTACAAGGCACAGATGAAGGGAGGGCTTTGG	11146:54:-
smaw_01_14234504	C01	14234504	173	-	A	G	GAATCATGCTCGACGTCACGAACGTGCTGTAAACCAACGCGTCCGAAGCGGGAAACATAACACGCAACACAACAAAGCACCGCGGNNNNNNNNNNNNNNNNNNNNNNNNNNNNNNNNNNNNNNNNNNNNNNNNNNNNNCCCTCTTTTAATCTCAATGGCCAACTGAACGATTTAAGATCGCTGCCTGAATGGAGATGGATGGCATTTGTGGAAGAGATGGCAA	11156:173:-
smaw_01_14278357	C01	14278357	231	-	C	T	ATGCGGCTGCTTACTTCAACGCTTTCGTCGATGGCATGTTTCACGTTTATATTCCAACGCCAATATTTAAAGCGATCAAACTGGGNNNNNNNNNNNNNNNNNNNNNNNNNNNNNNNNNNNNNNNNNNNNNNNNNNNNNNNNNNNNNNNNNNNNNNNNNNNNNNNACACAAGCGGACCCCATCGCTTTTACGTTTGACAGAGTACCGTTCCCCCGTTGAATACATTAGGAGGACTCGAGCAAATGAATAGCC	11184:231:-
smaw_01_14341989	C01	14341989	337	-	C	T	GAGCCGATGCTATCAAGTAGGCCAGGCAGGTATAACCACTGGGGGACGAGGGGCCGAGATCTGGCCTCCAACCAGTGTATTTTGTNNNNNNNNNNNNNNNNNNNNNNNNNNNNNNNNNNNNNNNNNNNNNNNNNNNNNNNNNNNNNNNNNNNNNNNNNNNNNNNNNNNNNNNNNNNNNNNNNNNNNNNNNNNNNNNNNNNNNNNNNNNNNNNNNNNNNNNNNNNNNNNNNNNNNNNNNNNNNNNNNNNNNNNNNNNNNNNNNNNNNNGGACTGATGTTTGTCCTCTAAGAGGGGATGAAAGGAGAATGTGCTCCCTTCCCTGAGAGACCCAGTCAGGGCTGCTCACCGAGCTGGGGATGGGAGCTCAGGATTGGGAGTAAGACGGCGA	11238:337:-
smaw_01_14347893	C01	14347893	190	+	A	T	TGTGTGACTGCTGCACTGCCCTTTACGTCTCACCCTCCGTTGCCAAAAACGACCGTTTGTTAGAAAAACCTCCAGGGGTCAATAANNNNNNNNNNNNNNNNNNNNNNNNNNNNNNNNNNNNNNNNNNNGAATAAGAGGAATGCCTGTCTATATCTTCAAAATCAGAGGGTCGCCGACTGCCCACCCCTGAGCCCTGCATCTGCACCCTGGCATAAGAGTCCCGTTGCCGGGGGGGAATGAGAGGCGAGCTTGAAGGAGGAACAGTGGCTCGCCTATGCTTGGGTCGCACAGT	11242:190:+
smaw_01_14351715	C01	14351715	154	-	G	T	TGAGGAGAAGGAGATGGGTTCTCATTCGCAATCACCGTGTCCCAACTCAGGGTCTACAGTGCGACAAGGCTTTACCATTTCAAAGNNNNNNNNNNNNNNNNNNNNNNNNNNNNNNNNNNNNNNNNNNNNNNGGGTGGATCCTTCTCGGGCCAACCCATCCCAGGATTCATTGTGCTATGAAGGTGGCTGAGCTGCCGCTTAAAGTAGCGAGAGTGAGGTCGAGGCAAG	11249:154:-
smaw_01_14353457	C01	14353457	74	-	C	T	TAAGATCAGTTGATCCAGACATCAGATCGGTGATGGTGCACACCTCGCCCCCTTGCTGTAAATTCTGTCACGCGTGGTGGATTTTNNNNNNNNNNNNNNNNNNNNNNNNNNNNNNNNNNNNNNNNNNNNNNNNNNNNNNNNNNNNNNNNNNNNGTGGAGGTGACGGAGGAGCAGAAGAAAGTGATGAGGACACAGGACATCAAGTATGTGGAGATGAAAAGGGTTGCAGAGGCCAGGGTG	11254:74:-
smaw_01_14356347	C01	14356347	332	-	C	T	CTTACAATATGTCAGCAGTGTTATTTTTACGGGGTCATATTGGAAAACCAAATGGCTCTGCATCTGTCCCACAAGGGCATTCCTCNNNNNNNNNNNNNNNNNNNNNNNNNNNNNNNNNNNNNNNNNNNNNNNNNNNNNNNNNNNNNNNNNNNNNNNNNNNNNNNNNNNNNNNNNNNCCCTGCCGCGGCCCACCAGGAAATTCACTTGTAATGATAAATACTCACATGAATTAAACAGCACGCAGCCCAATAAATCAGAATGCAGACATTTAACCCGTACATTCTGGCTCGAGCTGCCGTCTGCGTTTGCCTAGTTAAACACTACTTAGTGCGTTGGGTGGGTGGACCGGCGGT	11256:332:-
smaw_01_14371123	C01	14371123	248	-	G	C	ACAATGGGGGACTTGTGCAGGAAGAGCAGACACATTGAGCAGCTGCATACACACACCAAGCAGTTTGTTTAGGTCTCTTTGTGGGNNNNNNNNNNNNNNNNNNNNNNNNNNNNNNNNNNNNNNNNNNNNNNNNNNNNNNNNNNNNNNNNNNNNNNNNNNNNNNNNNNNNNNNNNNNNNNNNNNNNNNNNNNNNNNNNNNNNNNNNNNNNNNNNNNTTGATAATGAGAATCCAGGCACATCGGAAAGACATTGAACTCAAACCAGACGCACAAACTGGGGCCGAGTGATCCCGAGCCACCCTG	11270:248:-
smaw_01_14413137	C01	14413137	264	+	G	T	GGGTCAATCATGTATATGGCGAGTGACCCGAATCCTTCCGCCCTCATTAGAGCGGCACATGACAAACTGCGGCATCGTTTAAGGTNNNNNNNNNNNNNNNNNNNNNNNNNNNNNNNNNNNNNNNNNNNNNNNNNNNNNNNNNNNNNNNNNNNNNNNNNNNNNNNNNNNNNNNNATTTTAATCACACCACATCTGTTTTTGTGGCCAGCCACAGTATTATATGAATTCTGGTTCACAGAAATTGGGGTGAGCTTGGCATCGGCTGAAAGCTCCTTGTGTGTAAAGGAAGAATTATTTCAAAT	11304:264:+
smaw_01_14433194	C01	14433194	247	-	G	C	TCCACTCAGCCCTCTCTTGGCGGCACAAGGCGTTGGGTCTTCTTATGTTTCCCACAGCCTTGACATCCATCCACAGTATTCCCTCNNNNNNNNNNNNNNNNNNNNNNNNNNNNNNNNNNNNNNNNNNNNNNNNNNNNNNNNNNNNNNNNNNNNNNNNNNNNNNNNNCTGGTTGTCATTCAAACTGACGCATGGGTGGATGGTTACAGAACTAGCATTTCGTAAAGTCATGCAGGGCAATCAAATGTCTCTGT	11314:247:-
smaw_01_14445073	C01	14445073	308	-	G	A	TCCGCCTCTAGCTCATCCAAGACAAACGCACTCCTCTTGGCTCCAAAGTCCAAAGATGAGCTGTCATGGAGTTCAGGCCTTTCTTNNNNNNNNNNNNNNNNNNNNNNNNNNNNNNNNNNNNNNNNNNNNNNNNNNNNNNNNNNNNNNNNNAAATATGGTTTGGACCTCTACGACACTTTGAGTGTCAGTAACTGGACTGTGATGGCCACGGCCATGATGTAAACTTAAAGGGTCAGCTAAAAATAAGCCGTGCATGGCAAGTTTTAGGTGGGCTGTGCGCCACAGAGCTCCTTGCCAACAATTTTCTCCACTTGAATCG	11321:308:-
smaw_01_14507463	C01	14507463	31	+	G	T	GCTGTAGCCTAAATGTATTATCAGTCAGCTGTACCGCCCCTCTTTGTGGGACACTGGAGGGACAAGGGGAGGGAAGTCTTGATTTNNNNNNNNNNNNNNNNNNNNNNNNNNNNNNNNNNNNNNNNNNNNNNNNNNNNNNNNNNNNNNNNNNNNNNNNNNNNNNNNNNNNNNNNNNNNNNNNNNNNNNNNNNNNNNNNNNNNNNNNNNNNNNCCTGTTCAGCAAATCTAATACAACATATCCAGCTCTTCCTAAACATTCCCTGGCAGGTGTACCATATGTCATCTGGAGTTACTTTT	11355:31:+
smaw_01_14549474	C01	14549474	264	-	A	G	TATTGCTTTTGGATCTGGAGTTATGCAAGTTTATGAATTTAATCAAACCCAAAGCAGTTTTTATAGTAACCAGGAACAGCTTGCTNNNNNNNNNNNNNNNNNNNNNNNNNNNNNNNNNNNNNNNNNNNNNNNNNNNNNNNNNNNNNNNNNNNNNNNNNNNNNNNNNNNNNNNNNNNNNNNNNNNNNNNNNNNNNNNNNNNNNNNNNNNNNNNNNNNGCGATAAGACAAGACGCAACGTGACACTCTTTTACTACGCTAGAGGGTGTCTGATGACAAAACGTGACGGAGCAGAAGAGATAGA	11389:264:-
smaw_01_14558015	C01	14558015	14	+	C	T	ATGGGGTTAGGTTCATTGGAGACTCTAAATTGACCGTAGGTGTGAATGTGAGAGTGAATGGTTGTCCGTCTGTATGTGGCCCTGTNNNNNNNNNNNNNNNNNNNNNNNNNNNNNNNNNNNNNNNNNNNNNNNNNNNNNNNNNNNNNNNNNNNNNNNNNNNNNNNNNNNNNNNNNNNNNNNNNNNNNNNNNNNNNNNNNNNNNNNNNNNNNNNGTTCCTGAGCAGTTAAGTTTGGGTCTTTTGATTTGGATGAATCAAGTTTTACTTTATTGAGTTTTGTGTGGTCTCCACACTTTGT	11396:14:+
smaw_01_14558363	C01	14558363	227	-	T	C	GCTTGTATCGCTGCTGGTCTTTTTGTAATAAACCTTTATATACAATCAAGACGGTGTCGGCGGACTTCTCGTCAATACATCTTCANNNNNNNNNNNNNNNNNNNNNNNNNNNNNNNNNNNNNNNNNNNNNNNNNNNNNNNNNNNNNNNNNNNNNNNNNNNNNNNNNNNNNNNNNNNNNATATATTAGTGTTGCCAAATCATAGGAAGAGCCACCTCATTGACTGTAAATGACGCAGTGACTGATGATCCCTAGTGCTATGAAA	11398:227:-
smaw_01_14640252	C01	14640252	28	+	C	T	TGCTAGGTGGAAGAGACGTGCACTCAACTCATCTGCCTCATCCTGTGCTTTCATGTGCATCTTAGTGATGGACTTGCAAAGATTANNNNNNNNNNNNNNNNNNNNNNNNNNNNNNNNNNNNNNNNNNNNNNNNNNNNNNNNNNNNNNNNNNNNNNNNNACTCACACAGAGAAAGAGTTGTTTCTCGACCACCCACACCAAGAGCTAACTTTTTGAAGGGGTAGTGAGAGGAAATCCAAGGACGG	11445:28:+
smaw_01_14649147	C01	14649147	320	-	G	A	ATCCATGACCGTGTACGTGTGTTTTGTTTTTGTTTTGTTATTGTTTTTCTTCCCACCAGGCCAGGGGTAATAAAAGTCTGCGGAGNNNNNNNNNNNNNNNNNNNNNNNNNTCTCAGACATTTTTAAGCTCTCCTCGGAACTTTGCGTTCACTCATCTGGCCTGCCCCAGCGGCAGACACTGTGAAAAACCAGAGCNNNNNNNNNNNNNNNNNNNNNNNNNNNNNNNNNNNNNNNNNNNNNNNNNNNNNNNNNNNNNCACATATCTATCGCCGTTCTCGAGCCCCCTCTGCGGTTCAACTTGTACACGCTCCTATCGTCTCGCTGTACAGGCTCCCTGAGAG	11448:320:-
smaw_01_14651047	C01	14651047	2	-	G	A	ACGTTGAACAGAATCCACTCTCTCCCCTCAGGCCAAGGTGATAGAAGAGTCTTCGCAGTATGAATTCGAGAACTACATGCGCCAGNNNNNNNNNNNNNNNNNNNNNNNNNNNNNNNNNNNNNNNNNNNNNNNNNNNNNNNNNNAGCGCCAGTTTGGCAGCATTCCACCTGTGAGGCGCCTGGGCCACGACGCCCAGCCCGTCAGCCCACTAGATGCTGCCATCCTGGCACAACGTTTCCTCCGGAAGTAGTCTCTAACCCCCCGTCTCGGCCGCC	11449:2:-
smaw_01_14658975	C01	14658975	59	+	T	C	ACTCTGCGACCTGAGGTGCAATCAACGGGGTTCTGCGTGCTTTGTAACACTGCTCACGTCAGCCCTGACCCCGAACGCTCTCCCANNNNNNNNNNNNNNNNNNNNNNNNNNNNNNNNNNNNNNNNNNCAGAGTCCAGTTCACCTTCAGCAAAGACTCGTCAGACACAAGAGAGCTAGGCTTCAGGTTCCTGTGACTGATCTCACTCTTGGTCANNNNNNNNNNNNNNNNNNNNNNNNNNNNNNNNNNNNNACACTGGATACAGGCTGCTGGGGTTGGCTGAGGCCCGTCGGACACGTGAGCCGAGACAGAATGAATTACTACATGTAGCAGACTA	11454:59:+
smaw_01_14712666	C01	14712666	52	+	A	G	CCTGGCACCTAGCGCCGCCAGCCGCTTTACCACTCGCACACCGTGCAAGTTACAAGAATCGAAAAAATAATTTTTCCAAAGAAGTNNNNNNNNNNNNNNNNNNNNNNNNNNNNNNNNNNNNNNNNNNNNNNNNNNNNNNNNNNNNNNNNNNNNNNNNNNNNNNAGAGCAGTGATTCTCAATCAAAGACAATTTGCTTCATTTCAAACCCACAAAATATTTCAAAAAGATTGACCGTCCAATGTGAAGAANNNNNNNNNNNNNNNNNNNNNNNNNNNNNNNTGACTAGTGTAATTTCATTGCAGCAGCAGTCACATCCTCCCCTATGGTAAATTAGGCAGATCTGTCGACCATCTGGAAGCCGAGT	11501:52:+
smaw_01_14739638	C01	14739638	184	-	C	T	ATGACGAAGTGTAATTATGTGCCGCATAATAGCCAGTTCTAACCCCAACCCTGTTTAAGACACGAAGGGCAAAAGTAAAACCCTGNNNNNNNNNNNNNNNNNNNNNNNNNNNNNNNNNNNNNNNNNNNNNNNNNNNNTGACTAAAAAAAGCCCTGCGACAACAGACTAATAATGGAAGGTCACGCCTCCGCCTGACATAGCCGCGCAGAGGCAACTCATTCA	11524:184:-
smaw_01_14739909	C01	14739909	80	+	G	A	TTGTCCCAGTAGGGCGAGTTGCAGGGAGGGGACGCTCCTATTTGAAGGGGATATACCAGAGGAATAATACCTAGTCATAGCAAATNNNNNNNNNNNNNNNNNNNNNNNNNNNNNNNNNNNNNNNNNNNNNNNNNNNNNNNNNNNNNNNNTGTGTGTGTGTGTGTGTGTGTGTGATAGCAGGTGCAAATAAGGGGTCTGGCAGTCTCCAGAGCATCGTAATTGGTTTGAGATCTCATTA	11525:80:+
smaw_01_14744938	C01	14744938	266	-	T	C	CACCTCCAGCTGTCTGGAAGCTCGGAGCGGCCAGAGGCGAAGGACACCAACGCATCGGCACAGTACAGAGGAAATCAGCACGTTTNNNNNNNNNNNNNNNNNNNNNNNNNNNNNNNNNNNNNNNNNNNNNNNNNNNNNNNNNNNNNNNNNNNNNNNNNNNNNNNNNNNNNNNNNNNNNNNNNNNNNNNNNNNNNNNNNNNNNNNNNNNNNNNNNNNNNNNNNNNNNNNNNNNNNNNNNNNNTATTTCTACGATTCTGATAGAATGAATTATTTTTTCTTTTTTTTGTAAAGTAGATTTATATGCAAAATGCATCCATTGGAGTCATT	11531:266:-
smaw_01_14910365	C01	14910365	127	+	G	A	ACTCCTATACGGAATAGAATAATTGTGTGCCATTAACACAAGGGCCCATCGCTGGAGCCAAGCCGCAGCCATGGAGGGAAAAACCNNNNNNNNNNNNNNNNNNNNNNNNNNNNNNNNNNNNNNATTGAGCAGTGTAAAGTGGCATCCGTAGAGGTAGGCATGGAACTTGCGGAGCCTCTTGCTCAATTTGAGCATAATTTTGCTCTGCT	11623:127:+
smaw_01_14952584	C01	14952584	70	-	A	G	TTCCTTGATCTTTGTCACCTGACTTCTGTGCCCCTTTCTCACTTCCCCTGCTACTTTCTCCTTCACTGTTTTTTTTTACCATCTTNNNNNNNNNNNNNNNNNNNNNNNNNNNNNNNNNNNNNNNNNNNNNNNNNNNNNNNNNNCGTCTCCTGTCCCGTCTCCTGTTCTGTCTCCTGACCTGTTTCCTGTCCCCTCTCCTGTCCTGTCTCCTGTCCTGTCTCCTGTCCCGTATCCTGTCCCGTCTCCTTTCCCATCTCCTGACCTGTCTCCTGTCCCGTCTCCTGTCCTGTCTCCTGTCCTGTCTCCTGTCCAGACCGCTGTGCACCGGTCGAGT	11638:70:-
smaw_01_14974037	C01	14974037	138	-	G	T	TAGGGTTGGGCAGCCACACTCGGAGTTGTGCGAGTGAGCTGCGGAAGTGTTTGGACACGCCGTGCTCATTCATTGTGACGGAGTGNNNNNNNNNNNNNNNNNNNNNNNNNNGTTTTATATAACATTGTTTTGTCTTTCTTGTTTTGTAATTTGATGTTTATCTGTTCATTCAGTAATCCACTGGGTAACAGGGTGAGGGTAATATACCCCGGGATAAACGCCTGGACTTTTAGGAACGGTT	11649:138:-
smaw_01_14977306	C01	14977306	315	+	G	T	GTCCAGATGTTGGAGGATGGAGTGAAGAGCCATGTTAAGAGCATCGTCCACAGACCTGTTGGCTCTGTGGGCGAAATGCAGGGGGNNNNNNNNNNNNNNNNNNNNNNNNNNNNNNNNNNNNNNNNNNNNNNNNNNNNNNNNNNNNNNNNNNNNNNNNNNNNNNNNNNNNNNNNNNNNNNNNNNNNNNNNNNNNNNNNNNNNNNNNNNNNNNNNNNNNNNNNNNNNNNNNNNNNNNNNNNNNNNNNNNNNATGGCATGTCTCCAGTGAGGTGTTAAAAATGTCTGTGAACACCAGAGATAGCTGATTGGCACGGTGCTTCAAGGTGGAGGGAGAG	11652:315:+
smaw_01_14985036	C01	14985036	151	-	A	G	TACCTGTTTCCTTATGTCAGATAGGGTAGAAGATAGGTTAGCACAATAGAACAAAATGTTGCTTTCACAGAGGGTTGTCGGGGGGNNNNNNNNNNNNNNNNNNNNNNNNNNNNNNNNNNNNNNNNNNTGCGAACAACACTTCAAAAGGACTAAGATTATTTCTCGTTCTTTTCATCATCCTCATTTACATCAGAACCAGCGGCAGAGCTTATGTCCATGAAA	11662:151:-
smaw_01_14985415	C01	14985415	221	+	A	C	TGTCCCACACACAGCTGAGAGCCAGCTACACAGGATTCAGCCAGGTGACTACGTGGTGGTAAAGGACTTCAGGAGAAAGAACTGGNNNNNNNNNNNNNNNNNNNNNNNNNNNNNNNNNNNNNNNNNNNNNNNNNNNNNNNNNNNNNNNNNNNNNNGAGCAACTTGGATTCACGCCAGCCACCGCAAAAGGGTTCCGCTCCCCACAGAGCCACCCTTGACCATCCGAGAGTAAAGGTATTAGCACATTACAATCCGTGCCAAAAATACCCGACGTTAAACAACACCACCGAGTGAGA	11663:221:+
smaw_01_14997847	C01	14997847	267	-	A	G	GAGCCCTAATAACTTCCGCGCAGTTGCACTCACCCCCCATCATCACGAAAACCTGTTTACCACCCACACTCGACCCCTTCCAATTNNNNNNNNNNNNNNNNNNNNNNNNNNNNNNNNNNCTCCACGGCACTACACTCCGCCCTCTCCCACCTTGACAACAGTTACACCTATGTGAGATGCTGTTCATCGACTTCAGTTCAGCATTCAACACCATCATCCCCTCCAAGCTGATCACCAAACTCAGCGACCTGGGCATCAATAACTCCTTC	11672:267:-
smaw_01_15030064	C01	15030064	78	+	G	A	GCTGGAAATAGAGGCTACATCCACCTCTTCCAAAGAAGCAGCGTCGGGAAAAGGACGGAAGTTCAATGGCATTATCAGGTTTCGANNNNNNNNNNNNNNNNNNNNNNNNNNNNNNNNNNNNNNNNNNNNNNNNNNNNNNNNNNNNNNNNNNNNNNNNNNNNNNNNNNNNNNNNNNNNNNNNNNNNNNNNNNNNNNNNNNNNNNNNNNNNNATGGCAAGCAGAAACAATCAGTGAGCAGCTGAAGTCTCTCTCGAGGTGTCATAGTCTCGGGGAGAGGACGACATTATAGCTAAAT	11688:78:+
smaw_01_15045314	C01	15045314	175	-	C	T	TCTCCGTCCCTGAAGGCGAGCTCGTCAAGCTCGGTGAACAGGTCGTGGGGCACGTGCTCCTCGTCGTCGTCCTCAGTCCCGAGGANNNNNNGGACTCTCTGCGACGGCGTGTCTGCGGGGACACAACACACTCGTCATCGTGTCTCGCCCGAGGCTTCACACTCAGAGAGAAGCGATTTGTGACCGAGCCGGAGCCAGACCGTTCGTGGGCGAGTCCCGTCCGTCCTCCCGGTCCATGTTGTCCCGCCGTCTCCGGTGATGTCTGTGTCCTCGGTG	11695:175:-
smaw_01_15068994	C01	15068994	68	+	G	A	ATGGGTCATAAGCCACGCCCCCTCCATTTTAGCAGATGGAACATGTTCAATTCAATATAGAAACGGGGCTGAGAGACGTCATGATNNNNNNNNNNNNNNNNNNNNNNNNNNNNNNNNNNNNNNNNNNNNNNNNNNNNNNNNNNNNNNNACATCGCTCGCACAAGATGGCGGCTCCTGAATCTGAGATTTTTTCGCCTCACATTTGTTCAACTAGAGGAAGTGTTCATGTTTAATGTTTTGGTTCTTTTCTACTTTTCTTCAGAGAACCAAACAACTCTGGATCTCGTATCTCAGTATCTGTTCCCGGATTTAGAATTCATTCTCTTCTTCTTCTTCTTTCCATA	11722:68:+
smaw_01_15078862	C01	15078862	197	-	C	T	TTCTCGGCAGAGGAGAAGTCTTTGCGGCACTGGAGGCAGCGGTGAGGCGTCTCCCCCTGACGACAGACACAATGTGTGACACATTNNNNNNNNNNNNNNNNNNNNNNNNNNNNNNATGACGAAAACATCTAATCAATTCAAGTTGAAGGTTAAACTGTTTCTGAGTGGTTTGATCACAACCTGCTGCCAACAGGAAGTGAA	11729:197:-
smaw_01_15079267	C01	15079267	168	+	G	A	TCGCCTGCGACGTCTGCGGCCGTAGTTTCACCAGAGCATCGCGGCTAAAGGACCATGTAAGGTCCCACACGGGGGAGAAACCGTANNNNNNNNNNNNNNNNNNGAAACGATTCTCAGTGCAGCGGGTGTTCAGGAAGCACCAAGAGATCCACAGCAGGGAGGGACACGCCTCCTCCACCGCCGCCGCCGCCGACAATGTGATGCCGGGCCACGTGTCTGACAAACGCCACGTCTGCAGCATCTGCTCCAAGAGCTT	11732:168:+
smaw_01_15079643	C01	15079643	116	+	G	A	TGAGATACATTTTGTCTAAAAGAATTGAAACGGGTGTGGTCTGTTTCAGGAGTTCTGGTTCAACATGCAGAATGTGGAGGGGGAGNNNNNNNNNNNNNNNNNNNNNNNNNNGGAGGGTCTGGAAGAGGAGGTAAGAAACGAGCTGTGAACATCTATTTCTTGTGTGTCCACGATCAAGTTCCCCCGTCCGTGTCTCNNNNNNNNNNNNNNNNNNNNNNNNNNNNNNNNNNNNNNNNNNNNNNNNNNNNNNNNNNNNNNNNNNNNGCCGCCTGGTAACCATGGCAATGGCTTAGTGTCAAAGGAGGACGGAGGAGACGTCAGCGGCCTGATAAACTCTGACGGAGAGGAA	11733:116:+
smaw_01_15084720	C01	15084720	77	+	T	C	ACAGAAAAGCTTTCACATCTGGTTCCTTGAATGTTCGTCTCAAGATGTTGCTGCTTCACAATAATCAAACCAGATTTAAAACGACNNNNNNNNNNNNNNNNNNNNNNNNNNNNNNNNNNNNNNNNNNNNNNNNNNNNNNNNNNNNNNNNNNNNNNNNNNNNNNNNNNNNNNNNNNNNNNNNNNNNNNNNNNNNNNNNNNNNNNNNNNNNNNNNNNNNNNNNNNNNNNNAACACAAAGGAATCACCGACAGTGATGGTGATTTTCGTGCAAACGTCAATGTTTCCTCTTCACACATGAACCGCAGTGACCTGAG	11739:77:+
smaw_01_15086338	C01	15086338	198	-	T	C	GAGTGTCCGTCCAGGCAGCGGTGCAGCTTCTCCCTGATTCCTCTGAACAGGTCCCACATGTAGTTGAGCGTGAAGAAGAAGGACGNNNNNNNNNNNNNNNNNNNNNNNNNNNNNAGCAGAGTGTTAACGGTCGCTGCCTCGGAACAATGGATGTAGGTCAGGAATGTTTTCCCCATGTTTTCCTGTTTTCTCTCTTTACGCTCAGTCGTTTCCGGCTCATCTCCGTCTGA	11740:198:-
smaw_01_15087402	C01	15087402	152	-	T	C	GGGAGATTGAGGCCGCCATTTTGTTTTTGTAGCAAAACGGGAAAAAAACACCATTGTGTCTTTCTTTTTCATGTGCGAGAAACTCNNNNNNNNNNNNNNNNNNNNGAGGACGAAGGCGGCGAGGAAGACGGCGATGGTGTAGGTGTGGAGCAGGTGGCAGGCTCTGATTGGCTGCTGGTGCTCGGCGGTCAGGTACAGTGCTCC	11742:152:-
smaw_01_15095683	C01	15095683	10	+	T	A	ACAGGTCATTAGCCCCGCCCCCTCCATGTCATGTGAGGTCGTTCGTATCACTGACGTTTGTTCACGTGTTCATGTTTCTGATCAANNNNNNNNNNNNNNNNNNNNNNNNNNNNNNNNNNNNNNNNNNNNNNNNNNNNNNNNNNNNNNNNNNNNNNNNNNNNNNNNNNNNNNNNNNTGTGTGTGGGCGGGGCCTCAATCCCACGGCAAGTTTATCTGAACCTGAGAACCGCGACCGTCGCTCCACTGTAGATGTGAACGTTTCTGGACCTTGAGCGTTAATCACAAGTCCAGCAACACAACACACCCGACAGCAGCAACACATGTAGACGTGTCAGCATCTCTGTGAACGCGTGTCCGAT	11749:10:+
smaw_01_15115459	C01	15115459	42	+	G	A	TCGTGGGTGGACTGTCCGTGGCTGCCGCGCGACGCAAACGGGTCGAACACTTACCTTTATCGTACAGTCCATTGCAGCAGTCGCGNNNNNNNNNNNNNNNNNNNNNNNNNNNNNNNNNNNNNNNNNNNNNNNNNNNAAGTCTCTCTATACGCCTCGCTTCAATTCGTGCACGGGCGCGTCGGCTCTCTGGCGCAAACCATTGCAGTTACAATTTTTTTTGCTC	11759:42:+
smaw_01_15126904	C01	15126904	52	-	C	T	GGAAGAAGCTGAAAAGGCACTAGAGGAGGACACAACAATCCCGTCTGCCCCGTCAGTAACAAATCCCCTCTCTCTGAGGAGGTCANNNNNNNNNNNNNNNNNNNNNNNNNNNNNNNNNNNNNNNNNNNNNNNNNNNNNNNNNNNNNNNNNNNNNNNNNNNNNNNNNNNNNNNNNNNNNNNNNNNNNNNNNNNNNAAAGTTACAAACCAACAAAAGCTTTTTTTAAAAGGGCACATACAATGCTGGCCTCTATCTGGGAAATGATTATGTAAAAATGCAT	11769:52:-
smaw_01_15132809	C01	15132809	177	-	C	A	AAATAGCAAATCCCCATAGAGCCCCATGTTAAAATGCCCAACTTTACAGCAGAATTAAACATGTTTGCAGCCTGGTTCAAAAAACNNNNNNNNNNNNNNNNNNNNNNNNNNNNNNNNNNNNNNNNNNNNNNNNNNNNNNNNNNNNNNNNNNATATTATATTAAGGTTTGAAATTCTGCATAATTAGGGGCGTGGAAACTTGATTGACAGGTGACGCCACTGTTTGTTAGCCGCTCAGTGGCAGCTAGCCTCTGGCAGCGTTAGAGCTAATTCCCGGTCATTGAACGGGACTTCTCGACCGCCGTGTCGGAGGCTTGCGGAGAACAT	11775:177:-
smaw_01_15181146	C01	15181146	61	+	C	T	CCGATGTTACCGTGGTGACCACGGGCGAAGCAGTAGGCGCCGACGCCGTCAAGACCCCGCCGTCGCTGCGCCGCCGAAAACGTACNNNNNNNNNNCGGCAGGGCGAGAGGGAGAGAGAGAGGGACGGAGGCAGCGCGGGCGGTGGAGAGCGAGGGGAGAGAGGAGTCGGGGAGGAGAGGGA	11814:61:+
smaw_01_15196831	C01	15196831	10	+	A	T	GAGACATCGAAGGTAGGGATGAAGCAGGACGAAGGAAAGAGAACGTTAGCACAAGCCATTTCTACAAAAGCAAGGGGAGGTCGGGNNNNNNNNNNNNNNNNNNNNNNNNNNNNNNNNNNNNNNNNNNNNNNNNNNNNNNNNNNNNNNNNNNNNNNNNNNNNNNNNNNNNNNNNNNNNNNNNNNNNNNNNNNNAAGACTTCACAGGCGCAAAACTACAAAAAAAACAATGGCAGCAAACATAGACGTCCCCAATGCACTGAAAACCAGAACACCGACCCAGACCACCCAGCCGGACCCGAGAACGGCAGAAACCGAGCCTTTGGTCAACTTTAA	11823:10:+
smaw_01_15201648	C01	15201648	280	-	C	G	GGATGCCCCTCTCTACGTACAACATACGTAATAATGTGTTAATTCTGACCCTGAAGAATAGTGTCGTGAAAAAGACAAAAAAAAANNNNNNNNNNNNNNNNNNNNNNNNNNNNNNNNNNNNNNNNNNNNNNNNNNNNNNNNNNNNNNNNNNNNNNNNNNNNNNNNNNNNNNNNNNNCGAGAAGCCGTTTACTCCCATATATTCTGAAACACCTTCCGAAATAGCCTGAGCTTCATAATCCATCACCTTTAAGTCATTGCCAGTCCCCTGATAACCAGGAGGAAGGAGAGCTGTCCTAAGGAAT	11828:280:-
smaw_01_15214600	C01	15214600	263	+	T	C	AGGAGCTGGAGTTCCTGGAGGTCCAGGAGGAGTACATCAAAGATGAACAGAAGAACCTCAAGAAAGAGTTCCTCCATGCTCAGGANNNNNNNNNNNNNNNNNNNNNNNNNNNNNNNNNNNNNNNNNNNNNNNNNNNNNNNNNNNNNNNNNNNNNNNNNNNNNNNNNNNNNNNNNNNNNNNNNNNNNNNNNNNNNNNNNNNNNNNNNNNNNNNNNCCTACCCCGACCGACACAGAAAAAGTATTATTTGCAACCCCAAATTAATTCTGAGTGATTAAAAAAGTGATTTAGCCATGTTTGAC	11837:263:+
smaw_01_15262019	C01	15262019	8	+	G	A	TCATCCAGCAGCACGGACAGCTGCCACTCTCACGTTGGCTGATCCGCCGATACTGCGCAACACTGGGGAGGACGGTTTAAAACCANNNNNNNNNNNNNNNNNNNNNNNNNNNNNNNNNNNNNNNNNNNNNNNNNNNNNNNNNNNNNNNNNNNNNTTGAAAGGTGCCGACAAATAAAATGTATTATTATTATTATTATAGTACATCCTCTATCCCCTTTTGGGAAATCCACCACTCTGACTCTTTGCCATGTTTTATTTTTATTTAAAATGTTGTACGTCTGTGATACAGGCCC	11862:8:+
smaw_01_15284228	C01	15284228	40	+	G	A	CAAGTCACCTTCTTTTCTGATGATGCACGTACTGTACCTGACAGAAAGTTATCTGTTCCAGAGGTCTATGGTCCAGCATTGAGCANNNNNNNNNNNNNNNNNNNNNNNNNNNNNNNNNNNNNNNNNNNNNNNNNNNNNNNNNNNNNNNNNNNNNNNNNNNNNNNNNNNNNNNNNNNNNNNNNNNNTATCACCCTGCATGCAGGGATCTTATTTCTTATTCATCTCACCGTTTGTGTGCGAACGTCTCTCAGATGCCAGTTGCCAGTGGAANNNNNNNNNNNNNNNNNNNNNNNNNNNNNNNNNNNNNNNNNNNNNNNNCATCCCCTGCACCTTCATGTATCCAGCTGGCGTCAGGCCGTACCGCGGCATCCACGGTATCTGGTACTTTTGCCAGCCCTA…	11876:40:+
smaw_01_15288535	C01	15288535	16	-	A	G	GCAAGGCCAGCGAGGTGCCCTCTTGGACCGTCATGGAGTCGTTCACCAGGGGCTCGCGCGGAGGGTCTGCATGAAAAAGTAGCAANNNNNNNNNNNNNNNNNNNNNNNNNNNNNNNNNNNNNNNNNNNNNNNNNNNNNNNNNNNNNNNNNNNNNNNNNNNNNNNNNNNNNNNNNNNNNNNNNNNNNNNNNNNNNNNNATTCTAGTTAAACCTGAAAACATTTAGTTTTTCCGCCACTCTTTGGGGGGCAGCTGTGAAAGTAGGATCACCATCTGCGTTTGTGTGCCTCAGCCAACCGGTCAAGTTTCAACATCCATGTCTGTCTAGGCCTGTC	11879:16:-
smaw_01_15301746	C01	15301746	47	+	C	A	GTCGACAGTTTCCCCCCGTCCCTCGTCAAGTGGACAAAACTCGGCTCCAGCACGAACCTGCACAGCGGAAGTGACATGCGCAACGNNNNNNNNNNNNNNNNNNNNNNNNNNNNNNNNNNNNNNNNNNNNNNNNNNNNNNNNNNNNNNNNNNNNNNNNNNNNNNNNNNNNNNNNNNNGACTGTATATGCTGATGTGACGGTGACTTGTGAGTAGACGGTGCTAATATTTTTTATGTGTGTGTCAGTGTGTATGTGTGTCTGTCTGTGCTTCTGCACAAGTCGTTAT	11885:47:+
smaw_01_15313657	C01	15313657	81	+	G	A	GACAAACGGTGTACTTGATTCTCTTAGCTTCAGTGGAAGAAACAGAGAAGAGCCTGGAAGAGAAGAAGAAAGTCAATCTGGAAACNNNNNNNNNNNNNNNNNNNNNNNNNNNNNNNNNNNNNNNNNNNNNNNNNNNNNNNNNNNNNNNNNNNNNNNNNNNNNNNNNNNNNNNNNNNNNNNNNNNNNNNNNNNNNNNNNNNNNNNNNCACGCCTTTCTCTTGGCTCTACCGACGTTCACCTCAGCGCTGGTCACCCAGAAAAAGGAGGCATTCAAAGCACTGGTATGGGCGG	11893:81:+
smaw_01_15352383	C01	15352383	264	-	A	G	TGCAACAGGTGAGCGACTGAGGTGCATTTTCAGAAATGCAGCGTGGGCGGCAACAGGGAGAAACCGTTCCAAAGAATTCCGCTTCNNNNNNNNNNNNNNNNNNNNNNNNNNNNNNNNNNNNNNNNNNNNNNNNNNNNNNNNNNNNNNNNNNNNNNNNNNNNNNNNNNNNNNNNNNNNNNNNNNNNNNNNNNNGATTTGTGGTAATCAAACTAGCAAAGTCATGTTATCTAAATGCACAATCTATTAGATTAGAAGTGATCCAGTCACCAGTCAGAAAAAAACGTGTTTGTCCAGTCCACAATTTTTTTGGGGGGGGCGGCACAATGTGCGATTGTTCA	11913:264:-
smaw_01_15380492	C01	15380492	57	-	T	A	TTATATGGTCACATCATGTATGTAGTACTTTATGCCAATAAAACATACAGTGTGCAAGGCGTTCAGCAGGACACGTGCGAGGTCGNNNNNNNNNNNNNNNNNNNNNNNNNNNNNNNNNNNNNNNNNNNNNNNNNNNNNNNNNNNNNNNNGGCTTTTCTGACGCTACCGTTTCCGTATAGGAACAACATGCTGGAAGTGGCCGACTGGCTGGTGGTGGTGGGCACGGTCAGCATC	11930:57:-
smaw_01_15392884	C01	15392884	293	-	T	C	AGCTGCTGCATCTCGCCCTCGCTCTACAGCGCCGTCACCTGGCTGGGATACCTCAACAGTGCCGTCAACCCCATCATCTACACCANNNNNNNNNNNNNNNNNNNNNNNNNNNNNNNNNNNNNNNNNNNNNNNNNNNNNNNNNNNNNNNNNNNNNNNNNNNNNNNNNNNNNNNNNNNNNNNNNNNNNNNNNNNNNNNNNNNNNNNNNNNNNNNNNNNGAGATGACGTTTTTCGAATGTAAGGAGAGCGGGATGAAGCAAACTGATGAGTTAAGGTGATATAAGCTATAAGGAAAATAAAGAGAA	11941:293:-
smaw_01_15398183	C01	15398183	76	-	C	A	TACACAGCGGTGGCCATGCCGATGCTCTACAACACCAGATACAGCTCCAGGAGGAGGGTGACGGTGATGATTGCCGTGGTGTGGTNNNNNNNNNNNNNNNNNNNCTGCCCCTTACTGTTTGGACTCAACAACACTGGTACAGTAACTGCTACATCTGATCTGTGCTCTCGAGTTACGTTGTCCAGGTGT	11948:76:-
smaw_01_15451742	C01	15451742	212	-	G	T	GTCCTGCGGAGATCAGCCAAACAACAGCACTGACCACCACCGCGTACACAGGCTTGTGCAGCTTATGATAGGTGATGGGGAAAGCNNNNNNNNNNNNNNNNNNNNNNNNNACCGCCATCAGCAACAGGGAGCTGGTGTAGATCGTGGAGAAGAAGGTGAAGGAGGTGATGGAGCACAGAAAGTCGGGCAGGTTCCAGGCCATGCCCGACGCCGCCTCATGCATCTTGAGAGGGAGGATCATCAGGAAGAGCAGGTCAGAGATGGTCAGGTTGAGGAGCAGGATGTCCATCGG	11992:212:-
smaw_01_15464453	C01	15464453	42	-	C	T	GGCCCAGAATTTCGTGCTACACCCCTGCCTGTGGCTCTCAGGCCATCCATGAGCAAGTGCTTGCTCATTGTGGGATTTGTTGGGTNNNNNNNNNNNNNNNNNNNNNNNNNNNNNNNNNNNNNNNNNNNNNNNNNNNNNNNNNNNNNNNNNNNNNNNNNNNNNNNNNNNNNNNNNNNNNNNNNNNNNNNNNNNNNNNNNNNNNNNNNNNNNNNNNNNNNNNNNNNNNCAAACTTGTGACTTTGTCTCCGTGCTGACAGGTGCATACAGCGAACTGCTGGTTTTCCCTTCTGGTCCCACCGTGGTGAATGCGAGAGCTGGCAGCAACGTGACTCTGGCTGTGTCCTTCAGTGGGGCCCCTGATCCGGTGGTCACCTGGTTCAAGGGAGGTTTACCTGTCCT…	12000:42:-
smaw_01_15478341	C01	15478341	184	-	C	T	GTTCACCTCCTCTAAAACCATGAGAAAATACTACCAAACCACCATTCAACAGCCAGCCATCTGCAACAGTGTTTCCACTCGATCTNNNNNNNNNNNNNNNNNNNNNNNNNNNNNNNNNNNNNNNNNNNNNNNNNNNNNNNNNNNNNNTACATTCTCCAGGTCAACAAAGCCCTGACCACCCTCGTGGAGAGCAGAGGACAGCAACCTCCAGCCAGTGGTATTCTGACCGACCA	12013:184:-
smaw_01_15494508	C01	15494508	154	-	G	A	CCATCGTTATTTACAGTACGATTCTGTATTGTTGTGCTTATTAATACCCTCAGATGTGACTTTGTCTCTGAGCAAATTGAGGAACNNNNNNNNNNNNNNNNNNNNNNNNNNGGCCAAGGCCGCGTGGGTCAACGTGTGGCATGGCTGACTGGGCTGCAACAGGAAATCCTTCACCGTGGCGAAGGAGACACTCTGGAATATCCACCACCCGGGCTAAAGGATGTAATTACAACCTCTCAAATGGAACAATTAGCCGCTCATTTTCAACACATTACGCTTTTGCATAACCCGCAGAGCCACCAAATTGAATCC	12027:154:-
smaw_01_15540222	C01	15540222	221	-	C	T	GTCCTCATTTGCTCTGTGGAGTTTCAACTGTTTGCGTCAGGCAATTGAGCGCTGCAACGGCCCCCATTGCTCAGCAGCCACCAAANNNNNNNNNNNNNNNNNNNNNNNNNNNNNNNNNNNNNNNNNNNNNNNNNNNNNNNNNNNNNNNNNGACTCTCTCTTGTGATCTTAAAAGTATGTTAATGTAATTTATTGAACCTCTTACCCTAATCACACACATTGCCTATAATTACATANNNNNNNNNNNNNNNNNNNNNNNNNNNNNNNNNNNNNNNNNNNNNNNNNNNNNNNNNNNNNNNNNNNNNNNNNNTCTTAAAGGAAAGAAAAGTGCCTCGCTACTACTTTTAGCTGCCTCCGTGAACCGCGGCAAGGTTGCTGTGGTTCACGTTAGCCTC	12054:221:-
smaw_01_15568648	C01	15568648	273	-	C	G	AGCACGCACCCGCACGCACGCGCACACGCACACACGCACGCCTGAGCTTGTCATATCTCCTGTTGGTTTTCAGAGTAAAATACTTNNNNNNNNNNNNNNNNNNNNNNNNNNNNNNNNNNNNNNNNNNNNNNNNNNNNNNNNNNNNNNNNNNNNNNNNNNNNNNNNNNNNNNNNNNNNNNNNNNNNNNNNNNNNNNNNNNNNNNNNNNNNNNNNNNNNNNNNNNNNNNNNNNNNNNNNNNNNNNNNNNNNNNNATGCGTCCTGTGTGTATCTAGGCTCGGAGATGACAGTGTTTAGAGATCAGAGCATCAGAACACATGGCAAAAACATCCGTGCTAA	12067:273:-
smaw_01_15589416	C01	15589416	245	-	A	G	CCTTCATGACCCAGAATATGAACAAGCATGTTGGGCAACAAGACAAGAATGAATGAAGGTGAATGTCATGCCATCTAATTAAGGTNNNNNNNNNNNNNNNNNNNNNNNNNNNNNNNNNNNNNNNNNNNNNNNNNNNNNNNNNNNNNNNNNNNNNNNNNNNNNNNNNNNNNNNNNNNNCACACGATGTGGGTTTAGGACACAATTGTTGTCATTGTTTCAATTATGGATCCAAAGAGTATGTATTTTCGCTAATAAGCAAGTG	12075:245:-
smaw_01_15633574	C01	15633574	85	+	G	C	ACAACGACTGACTTTGAAGGACTTCCCATATGTGATGGCACAAACTGCCACCGAAGCCCGTGCCACTCGTTTCACGCCAGACAGGNNNNNNNNNNNNNNNNNNNNNNNNNNNNNNNNNNNNNNNGGAACTGGAATGGAGAACCATTGTCCCAAATCCTCGCTCAAAACTGGAGACTCTTTATTGCAAAGAGCGCTTGGACAAATCTCAG	12090:85:+
smaw_01_15664127	C01	15664127	188	-	A	C	ATGTCGTCAGGTGAGAAGGTCTGGAGGGAGAATAACACTAAGCTCACCATCTGCAAACCCAGATAACACCGAGCCATGCTGCGTGNNNNNNNNNNNNNNNNNNNNNNNNCCCACTTTGTGTGCCTAAGCAGTGATCAGAACAAGGACATGCAGCATGTATATTAGCCCGCCGTAGGGATGTCTGGAATCGCATG	12105:188:-
smaw_01_15732834	C01	15732834	12	+	G	A	AGGCCTTTCGCGGAGCACCCACTTCGTAGTGCGATATGAAAACACCATCTGGCGTGTGCAAGCGGCGGCTAGGCTAAGCTAAGTGNNNNNNNNNNNNNNNNNNNNNNNNNNNNNNNNNNNNNNNNNNNNNNNNNNNNNNNNNNNNNNNNNNNNNNNNNNNNNNNNNNNNNNNNNNNNNNNNNNNNNNNNNNNNNNNNNNNNNNNNNNNNTACCTGCACTTCCCCGATGCAGTCAAGTCTTCTTAGCATTAGTTATCAGGCACGTTACGAGCACATTTTGGTGCATTACCTATTTANNNNNNNNNNNNNNNNNNNNNNNNNNNNNNNNNNNNACACTTTTAGTTGGACTCAACGGCTCGTCTAATACAAGCCGACTGGCTTTGCTGGCTCAACTTAAAAA…	12143:12:+
smaw_01_15742951	C01	15742951	254	-	A	C	TTCCTCCAGCAGAAGTGTCTCGAGTGTGATTTGAATTCACCACTTTGCCTCCTTGACCTCGAACGTCGCCTGGCACATCAAGGAANNNNNNNNNNNNNNNNNNNNNNNNNNNNNNNNNNNNNNNNNNNNNNNNNNNNNNNNNNNNNNNNNNNNNNNNNNNNNNNNNNNNNNNNNNNNNNNNNNNNNNNNNNNNNNCCTGAAATACAGACGTGTTGACTTAAGGGTCACGAAACTGGCGGCGGCTGGGATTTTTTTCAATAAATGCTTTTAAAACTGTTTCAC	12159:254:-
smaw_01_15745870	C01	15745870	301	-	C	T	GTGCAATTACTCATAACTGCCAATGTGATAACATGAAAGTCTGCGTATCACTGTATTGTGCACAAATTCAAACTCGTTTCAAATTNNNNNNNNNNNNNNNNNNNNAGGTTGTCTGGACGTGTGTGCGCGCGCGTCGGTGTGCGACATGTTTGCGCACACGGATGCACTAGGACACGCACACACAGCGGCGNNNNNNNNNNNNNNNNNNNNNNNNNNNNNNNNNNNNNNNNNNNNNNNNNNNNNNNNNNNNNNNNNNNAAGAGACGCAGCTCACACAGACTTTGTGTTCATCCTTGTCTCAGATTATTTGACAAGCTGGTGTCTGTCTCACTTTAAAGCCATATCAGTGAATTACCCGGACCAGGATAATCATGTACACAA	12162:301:-
smaw_01_15752553	C01	15752553	58	+	C	T	GAGTGGTAAAATGGCAACAGCAGAATTTGGGAGAACACTCGTCATTGAGCCTTTTAACTTACTATGCATAGTACACTCGATCTAANNNNNNNNNNNNNNNNNNNNNNNNNNNNNNNNNNNNNNNNNNNNNNNNNNNNNNNNNNNNNNNNNNNNNNNNNNNNNNNNNNNNNNNNNNNNNNNNNNNNNNNNNNNNNNNNNNNNNNNNNNNNNNNNNNNNACCAAAAGGGCCAACATCACACGCCGCAGTTCAACAACAATGTTGGCGGTCCATGAACTGAAGAGTAACAAGTGCCTTGTTTGTA	12166:58:+
smaw_01_15753034	C01	15753034	47	-	G	A	AGTACAGCCCCTGCATTTGACCATGGTGGTTAAAACCTTGCTGTGCCGAAAAACTAAGCTCTGGTCTTCGAATCAACCCTCATCTNNNNNNNNNNNNNNNNNNNNNNNNNNNNNNNNNNNNNNNNNNNNNNNNNNNNNNNNNNNNNNNNNNNNNNNNNNNNNNNNNNNNNGCTCTTTTTCCCATGACAGACTAAGGACTTCAGTGATCTGGAAACACCTTGGGCACTTGCTACTCTTGGGGTTTTACCTGAGCTG	12167:47:-
smaw_01_15794431	C01	15794431	231	-	G	A	CCAGCACTTTAACCATTCGCAGATCCAAATCTCATTTGTGGGTTGAAATGGCTTGGGGTATCTTCTCCCAACACAAGTGCGACTGNNNNNNNNNNNNNNNNNNNNNNNNNNNNNNNNNNNNNNNNNNNNNNNNNNNNNNNNNNNNNNNNNNNNNNNNATATTTCATTAGGATTGTGGCTTTGCAAGGGCTTCAAGGCGTATCAAGCGATACGTTATTCTCCGCTTCACACCGATTACTCTCTCGCCAGGCAGGGCCGGGGATAAAAGAGCCCTTATT	12189:231:-
smaw_01_15814859	C01	15814859	45	+	T	A	CAACAGCCCACCTCGTCTAACCCGTGGCCTGTTACCTCCCTGGATTATTACAGCAGTCGAGGACATGCACTCTGAGCAGCTTCTGNNNNNNNATTCGAATAACGTGCAGTTGTTCCTCAGTACAGCACGCTCTCTCTGCCAAGCTCGGTCCCTTGATCGCGCCGAGTGTTGCGTCAATTCTGAAAAGTATCGCCGTTTTTTTGAGGAATGATTCGGGGCCCGT	12197:45:+
smaw_01_15815335	C01	15815335	37	+	G	T	GATGCAGATGTTTTGTACAACAAAATGTGTTTGCTGGTTATGTGTCCGTTTTCTCCACACTGTAGTGTGTGTGTGTGTGTGTGTGNNNNNNNNNNNNNNNNNNNNNNNNNNNNNNNNNNNNNNNNNNNNNNNNNNNNNNNNNNNNNNNNNNNNNNNNNNNNNNNNNNNNNNNNNNCTGCTGCCTCTGTTTGTTTGGCTCCAGGCTTTCAGACTGTCAGTGCGAGGGCTGTGTAGTGAAACAAAACATGCTGTCATCTCCGTAA	12199:37:+
smaw_01_15821964	C01	15821964	215	-	G	A	CAGTAGAGCTGACGCAGTGGGTCACGCTGTGGGTCAGAGGTGACTCAAAGTTGAGCAGGCATCTTGGGAGAGATTATTGTTCATTNNNNNNNNNNNNNNNNNNNNNNNNNNNNNNNNNNNNNNNNNNNNNNNNNNNNNNNNNNNNNNTTTACTAAACTGATGATTGGCCAATGATTGAGCCGCTCATCAGCCTGGTTCACTCCTGGTTTGCTTCCTGCCCCGCGTGGACGGTGNNNNNNNNNACCCCGGACTTCACAGATTTCCATTCACGCCACACTGGTATTTAAATGGCATTAAACAACTCCCTCTCCAGGAGCCTGTTTCCAA	12206:215:-
smaw_01_15859729	C01	15859729	71	-	T	A	TTGAGGTGCAGGTCACGCCCTTTTGGCTCTGTTTGTCAGGTTTTGAAAGCAAAGGGATTGCGGCCATACCAGGGAGCCCTGACCGNACGACTGCCCTTAATAAAAGACTGACCAAGGCCGAGTCAGAGATCCTTTCGCTCAAGACCAGATTTGCCTGTGAGAAAGTGTCCTNNNNNNNNNNNNNNNNNNNNNNNNNNNNNNNNNNNNNNNNNNNNNNNNNNNNNNNNNNNNNNNNNNNNNNNNNNNNNNNNNNNNNNNNNNNNNNNNTGTGTTTATGACTTAATGAATGGCAACTTTGCCTCCGTCTCCTCAGCTGGCCTCTGAGGCTGGAGTGTTGGTGGCCAGTTGTGACGA	12240:71:-
smaw_01_15897801	C01	15897801	348	-	C	T	GGCTCCAGTCCTTCAACATCCGTAGCACCATGATGTGAAATTTTCACAGATTTTCTATGCTACGGTCTCCCGAGGACGGCCAACANNNNNNNNNNNNNNNNNNNNNNNNNNNNNNNNNNNNNNNNNNNNNNNNNNNNNNNNNNNNNNNNNNNNNNNNNNNNNNNNNNNNNNNNNNNNNNNNNNNNNNNNNNNNNNNNNNNNNNNNNNNNNNNNNNNNNNNNNNNNNNNNNNNNNNNNNNNNNNNNNNNNNNNNNNNNNNNNNNNNNNNNNNNNNTAAATGATCCTGGTTATCACCACAACTCTTGTAGTTATTACTTTTTCACTCATGTACTTCCTTTTCCCTTGCTGTGTATTGAGCA	12263:348:-
smaw_01_15901584	C01	15901584	25	+	G	A	GATTGGTGCTGTGAAACACAACTGGATGGGATGTGTTGCACTGGGGGTTCATCGCTGTCCTTTGTGCTCACCCGCTTCATGTGCTNNNNNNNNNNNNNNNNNNNNNNNNNNNNNNNNNNNNNNNNNNNNNNNNNNNNNNNNNNNNNNNNNTGTGGCGAGGCTGCTTATTGCTGAGCTGAATTAACAAATGACTTTTTTTTTCCCCCTCCCTTTGTCAAAATGTAAGATGGAGACTGGTTTATGTTCACAGCTGCTCTCAGACATGCTCCGAA	12267:25:+
smaw_01_15903271	C01	15903271	207	+	T	A	TAATGAGTTTAAAACATTTTTTTGACTACACTAGGCTCAAGAGAGAGGGAGAGAGTGAAAAGGCAAAGATGTGACACAGTGGATGNNNNNNNNNNNNNNNNNNNNNNNNNNNCTGCAACCAATGACCAGAGCAACTCTGAGCGCGCCCTCAAAAGCTGCTGCCGTCATCGCAAATGCATTTAAGATGAAGGATGAGANNNNNNNNGTGCATCATTCTGTTAGGTATCTCTCTTGTTTGCTCAGTGCCTCACATGTTCTCCATTCGGAGCATTTTCACCTCTTTTAGATTTT	12270:207:+
smaw_01_15908751	C01	15908751	63	-	C	T	GAGAGGAAGTCTGAGATGTCCATACTAGCTAAACTGTCGGACGAGGGAGGGTCGGGCGGGTCGGCGCTGCTCACCATCGTGGAGANNNNNNNNNNNNNNNNNNNNNNGGAAGGGGCGGCCTCCTCCAGGCTCGTTTCGCCCACCTCTGAGGAAGACGTGGGGAGACAGTGCGAGGGAGACGTTGTGGGTGGATG	12275:63:-
smaw_01_15928844	C01	15928844	4	-	T	G	ACAAAGTTCAGACATCCCGCAGTCCGCTGCGACGGCACCGCCGTCATGTAGCCACGGAGACTATGGCTCGTGCGTTGTGAGGGCANNNNNNNNNNNNNNNNNNNNNNNNNNNNNNNNNNNNNNNNNGTCGACATGGCGCGGCTGCGGAGGAAAGCGTGCACGGCCCTGTTCCTTTTCGCGGTGTTCGTCTTCGGGACCATGATGGGACTGAGGACCCTGAAGCCCGGCGACGGGCTC	12289:4:-
smaw_01_16000021	C01	16000021	15	+	C	T	GACATATTGTGGTGCGTGTGTGTGTGTTTCTCTCTCCGAGACTGTGTTAGTTCGATGCCATGGAGATTTGATGGGAGGCGGAGACNNNNNNNNNNNNNNNNNNNNNNNNNNNNNNNNNNNNNNNNNNNNNNNNNNNNNNNNNNNNNNNNNNNNNNNNNTTGTATTGCTGCTTGTGAGGTCTGTGCATACACCCACCGTACCCACATTTCACTGAAGTGGGGGGTAAAATACACTATGTTCCAGCTCCGTTACCCTCCGGCACATTATGTTGACTGTGACTTGCTGTGCTGATAAAACGCCCCAGTTTAGGGGTTTTGCTGAA	12319:15:+
smaw_01_16013597	C01	16013597	177	-	C	G	AAACAACCACACAAACGTGCTGAAACACACACATCCACCTAGGCGCACACTCACTGACTGTCTCCCACACGTACATTGCACACACNNNNNNNNNNNNNNNNNNNCCTGGCACATCGGGCACACTCATTACTGCAATGCCATGCTACCAGTTGCTAAGGAGACCTGTGGGAGAGGGAGGGTTCCTTGTTGNNNNNNNNNNNNNNNNNNNNNNNNNNNNNNNNNNNNNNNNNNNGGGAGAAACAAGGCAAGAGGTGGGGGGTGAAGTGGGTAGAGGTAGGGGGCAGCAGTTTAATAGGGCTGCGGAGGTGCAATGAAAC	12329:177:-
smaw_01_16015014	C01	16015014	83	-	C	G	AGTGCCATTTATAAAAAGGCTTAAAATGGAAAGCAAGTGTGTGGCAGTGTGTCTGGTAGCCTCAGAACAGGAAGTGGCTGTGGAGNNNNNNNNNNNNNNNNNNNNNNNNNNNNNNNNNNNNNNNNNNNNNNNNNNNNNNNNNNNNNNNNNNNNNNNNNNNNNNNNNNNNNNNNNNNNNNNNNNNNNNNAGTTGGCATCGGGGTGGCAGGGTGTGGGATAGAGGAGGGCTGCCGCAGCTTTGGTGGATAAAAATAGATGCTGACAGCTTAGCAGAGCATCTGAGACCCGGATAGGGGATCGGAAAATCCGCTCGCCTGATGCCAGGGAC	12332:83:-
smaw_01_16021236	C01	16021236	35	+	C	T	GTCTGCTAACAGGGGGTCCTGCTGGGCAGCAATACTGTTCCAAGGACATGATGCTGGGACAGGAGAGGGAAAGCCATCCTATGATNNNNNNNNNNNNNNNNNNNNNNNNNNNNNNNNNNNNNNNNNNNNNNNNNNNNNNNNACAATGGCCACAGTCACAGCCACAATGGACCTCATAGTCACAGCTCAGCTCATAACCATAACAGAACTCACAGTCATACTCCTAGTCATAATCACAACAGTGTAACCAACCACAACTCAACTCACAGCCTCTCTCACAACAGTCACAACCTCAACCAGAGCCATAAC	12340:35:+
smaw_01_16042355	C01	16042355	207	+	T	A	TGGCGACTCACATCCAATGCCAGATTTCAGTGCCGACGCAGGAGGCATGTGTATCTGTTTTGTGGCAAAGTGGACATTTGGCTGGNNNNNNNNNNNNNNNNNNNNNNNNNNNNNNNNNNNNNNNNNNNNNNNNNNNNNNNNNNNNNNNNNACAAGTGATCTTTTTGATATTTTGATAATGTATGCGTGAATAATTCTGTGTTGCCGTATTTGGCGTTTGCAGAATTGTCCAGTAGNNNNNNNNNNNNNNNNNNNNNNNNNNNNNNNNNNNNNNNNNNNNNNNNNNNNNNNNNNNNNNNNNNNNNNNNNNNNNNNNNNNNNNNNNNNNNNNNNNNNNNNNNNNNNNNNNNNNNNCAAACACTGTTGGGATTTTGAATATATCAGATCACTTCCTGCTTCT…	12353:207:+
smaw_01_16104707	C01	16104707	22	+	C	T	TTTCTTTCCCTGAGAGCGACACACTGTGAAATGTATCATGGGAAAACAGCGGTTGCTTTTGTTTTGTGATTCCATTTTTACCACANNNNNNNNNNNNNNNNNNNNNNNNNNNNNNNNNNNNNNNNNNNNNNNNNNNNNNNNNNNNNNNNNNNNNNNNNNNNNNNNNNNNNNNNNNNNNNNNNNNNNNNNNNNNNGCATCGTTGCCAGGCGAGTCCTTCGTGGAGAACACTGTCGTCACATCAGAGCACTTAAAGAAGAGCCCGCTCTCTCCAAACTCTA	12384:22:+
smaw_01_16144047	C01	16144047	79	+	G	A	GAAAGATATAGCTCAGCAGGTGAGGAATGCTTGGGATATTTCCGCGCTTCAGGAATGGTGTCTGAAGCCGAGGAAAAGGGGGAAANNNNNNNNNNNNNNNNNNNNNNNNNNNNNNNNNNNNNNNNNNNNNNNNNNNNNNNNNNNNNNNNNNNNNNNNNNNNNNNNNNNNNNNNNNNNNNNNNNNNNNNNNNNNNNNNNNNNNNNNNNNNNNNNNNNNNNNNNNNNNNNNNNNNNNNNNNNNNNACCGAGAGTGGTGATGCAATTGAATGCAACTGCCCAATCATTTCCCATGGAGCATGTTCTTGTACTCCTCTCTTATGTGTCTTAT	12402:79:+
smaw_01_16146462	C01	16146462	271	-	A	G	GAGCAGCTCTATTCCCCCAATCACAGCGCTCCCTCGGGCAGGGAAGGAAGGAGGAGAGTGTGGGAAAAAGGAGAGGGATGGAGAANNNNNNNNNNNNNNNNNNNNNNNNNNNNNNNNNNNNNNNNNNNNNNNNNNNNNNNNNNNNNNNNNNNNNNNNNNNNNNNNNNNNNNNNNNNNNNNNNNNNNCTGATTAGCCTAATTATTTAACACATGGGGACATTGCTGCATATGCATTTTTAAACTTCAACATAATTTGCACATTGTTATTATTTATCACTACAATCCGGCGTT	12404:271:-
smaw_01_16164605	C01	16164605	85	-	C	T	ACCTGCGCACAGCCTCACTCGCTCGGTCACGACCAAGCTCACGTCTTCACAATGAGGAGCTTGTAGCAGAAGCAGAGTTAGTTTGNNNNNNNNNNNNNNNNNNNNNNNNNNNNNNNNNNNNNNNNNNNNNNNNNNNNNNNNNNNNNNNNNNNNNNNNNNTGAAAAGAAGGAAACAGATCGAGCAGATGTAAACATCGGAGCGGCTCCACAGAAGCAACGACACCGACAGGGTTCACAAACGATGCGTTCTGCTTGACCGGCGAG	12412:85:-
smaw_01_16167095	C01	16167095	19	+	C	A	AGCTGCTCGACGGCGAAACATGCTGCGAAGTGATGTCGACTCGGACTTGCTAGCTAGCAGGCTAACCCAGCAGCTGTTGATATTGNNNNNNNNNNNNNNNNNNNNNNNNNNNNNNNNNNNNNNNNNNNNNNNNNNNNNNNNNNNNNNNNNNNNNNNNNNNNNNNNNNNNNNNNNNNNNNNNNNNNNNCAAGCGAAAACGTTCAAGCCCCTTCTGTGAAACCGAAATGAACACTGGCGTCTGAGTGTGAAGGAGAACTGCACTGAAAGATCACCG	12419:19:+
smaw_01_16187836	C01	16187836	40	-	G	A	AATCTCTTTGGCCTTTGCATAACACAGACACGGAAATTCCAAGGTTTCTCAATGTGGCAAAGGGGAACTATGGTGACACAGAGTCNNNNNNNNNNNNNCTCTCTGCACACAGCTCCCACCCAGCTCCCACTCATATCAACCCCAGCAGCAGGCACTCACAATGAACTTTGAAGGCCAGCGGCTNNNNNNNGTTGTCCGGTGCGGTCACATTTTCAGCGTTGGACACACAGCGATAAGGCCCCTCATAGTACTTTCCTGCTTGGGGGATGGACAGC	12432:40:-
smaw_01_16199307	C01	16199307	68	-	C	T	GTCTGTGCGTGTGCGTGTGTGTGTGAGTGAGTGAGAGAGTGAGCGCGAGTGGTGTCAGTGTTTGTGTGCGCGACAGTGCTCGGAGNNNNNNNNNNNNNNNNNNNNNNNNNNNNNNNNNNNNNNNNNNNNNNNNNNNNNNNACATAGTAATGTTCCCTTTCTTTCTCTCTCTCACGCACACGCACGCACGCCCGCACACAATTCCTCTGCCTGCGAGTGCCTGGATGTGACGGACGAGCCG	12444:68:-
smaw_01_16200424	C01	16200424	69	-	C	T	TGCACCGCTATGGGTAGTGACCACGAAACACCGTGCACCGTGACGGAGGCGACGCGGAGCTGTCCTAAGCCGCGGTGTTCCACAGNNNNNNNNNNNNNNNNNAAAGCAACAAAGGGCACACGGCGGGTGCCGTCAGGGGGGCTGCGCGACGGATCGCTTGATGTCACTGTGTCTGAGGAAAGTGTGGTCTCCAAAGGTCCCGTCAGCAGCTCGCGCTTGTGTAGAATATGAATTCAGTGACACGACACCACCACCGCCGCCGCCGCCGAGTCCGGCGCGCGGGATACGCGCCTGGTCCACTGCGGGCATTTGTTACGCGCTCCCATGTGGCTGT	12445:69:-
smaw_01_16200715	C01	16200715	323	-	G	A	TCAAGCAAAACTGTACGCATGCACACACGGCGACGAACACATGCAAACAAACAAAAAAAACATCTTTCACAGTATACTTCAGTTANNNNNNNNNNNNNNNNNNNNNNNNNNNNNNNNNNNNNNNNNNNNNNNNNNNNNNNNNNNNNNNNNNNNNNNNNNNNNNNNNNNNNNNNNNNNNNNNNNNNNNNNNNNNNNNNNNNNNNNNNNNNNNNNNNNNNNNNNGTCAGTGCAGCCAGGAGAACGTCTACGGAGCAAAAGCAGCTTTCCCATCTGTAAGCTACAAGAGACATCAACACAGCACAGCAAAGGTGACAATGCCCCGCCGAGCGCTTAACCCCCTCACTGCCTCCGGACCAGGTA	12447:323:-
smaw_01_16206841	C01	16206841	9	+	A	G	TCTTACAAAAGTCTTTTTTTGCAAGCTTTTGTGGACCATGTAGTCATGGACGACAACTGTTTTTGTGTGTATGTAGACACAGTAGNNNNNNNNNNNNNNNNNNNNNNNNNNNNNNNNNNNNNNNNNNNNNNNNNNNNNNNNNNNNNNNNNNNNNNNNNNNNNNNNNNNNNNNNNNNNNNNNNNNNNNNNNNNNNNNNNNNNNNNNNNNNNNNNNNNNNNNNNNATTTCTCTCTCCCCAAGGGCCAAGATGGCTGCCATCTGTCCTCCCCTGCATCGGCGCAAATCTGTTTTAGTCGCCACGTTCCCTA	12451:9:+
smaw_01_16215083	C01	16215083	288	-	G	C	AAGCTTGTCCCTACGCCATGTCCCCTTCTCCCCGTGTTTGATGTCCCTCAAAGCCAGCTCATTGATTCCAGCGCCAACCTTCTGTNNNNNNNNNNNNNNNNNNNNNNNNNNNNNNNNNNNNNNNNNNNNNNNNNNNNNNNNNNNNNNNNNNNTTCATTTGATGAATCTCAAGCTGGCGGATGTGTGTTTGCAATGCTCTTTACAGTACAGGTCAGCCTGACCTCATTACACCCGTGTCACTGTTTTCCTCCCCGCGCCTCAAGGCTGTGCTGCCAACTTAAACTTCTCAAAGAAGGTGCAGAGTGAGAGACAGGACGAG	12454:288:-
smaw_01_16238682	C01	16238682	70	+	T	C	TAGACTGCGTGGGTGTCCATGTTTGGCACCTTCAGCAGTTTCACTGTGTGCCACTTCACCAGTGTGATTTTTCTCGGGGACAAGGNNNNNNNNNNNNNNNNNNNNNNNNNNNNNNNNNNNNNNNNNNNNNNNNNNNNNNNNNNNNNNNNNNNNNNNNNCGGTGTGACGCTGACATAATTTAGTGAGCCAGTCTCTCTTATTGACAACATGTGTCGGCATCTGTCGCCCCTCGAAAAAAAGCAGGCCAATTATTTCCGCGGCACAATCGCTTGTGTTTGGATTTGTGAAGCCCCGACGCAGTATGAGAGTTTGACTCT	12472:70:+
smaw_01_16256855	C01	16256855	84	+	G	T	TTTGACATTTAAATGATATTCAGAGTAATTGTAGAATCCATCCATCTATCGTCTACCGCTTAATCCACTTAAGGGTCGCGGGGGGNNNNNNNNNNNNNNNNNNNNNNNNNNNNNNNNNNNNNNNNNNNNNNNNNNNNNNNNNNNNNNNNNNNNNNNNNNNNNNNNNNNNNNNCGGTCAACCATTCACTCTCACATTCACACCTACGGGCAATTTAGAGTCTTCAATTTACCTAACCCCATTCTGCATGTCTTTGGACTGTGGGAGGAAGCCGGAGAAACCGGAGAGAACCCACGCATACACGGGGAGAACATGCAAACTCCACACAGAAAGGCCCT	12482:84:+
smaw_01_16277253	C01	16277253	50	+	C	A	GAATTATTTAAAACATAACTCTACGCATGACTAACCTGGCCTTTCTAACCTGAAGGAAAACTCAAGTAAAACTTTAGAAGAAAAGNNNNNNNNNNNNNNNNNNNNNNNNNNNNNNNNNNNNNNNNNNNNNNNNNNNNNNNNNNNNNNNNNNNNNTTAAGCCCTCCACACCCACCAGGCGCTCACACTGGAGCGTATCCTTTCCATGGGCCCCTGCTGACACTATTCTCTCTCGGCCCTTATCCCTCGTCCTGTGGCTCTATGCTCCG	12499:50:+
smaw_01_16299282	C01	16299282	223	-	G	A	TCAATAAACCAGAAAAACCAATACCAAGTGTGGCCAATGCATACCTGCAATTCTACGCTCTTTGCCAGCAAGGGTATTCGGTAATNNNNNNNNNNNNNNNNNNNNNNNNNNNNNNNNNNNNNNNNNNNNNNNNNNNNNNNNNNTGTGCCGAACACACAGGGTCGAGCTAGTTCTGAGCCGCAGGTGTCCGAACAATCAGTCACCCGAGTAACCACGACAACACACGGA	12525:223:-
smaw_01_16301816	C01	16301816	63	+	T	C	TACACACCAAAGGGACGGCTGCCATGCGGTGGATTTTGTAGGGGGTGTTAAGACCAGCACTTTTGGCTGTGGTGAATCTCCAGTGNGGCGGCCGTTGCGTAATAGCCCTGTAAATTTCCTTTAAGCCGCTGTTGGGCCGTGTGGGGTGGCCATTGTTGCGGGGTTGTTGAG	12527:63:+
smaw_01_16305220	C01	16305220	75	-	C	T	AGCGTCGTACTTAAGTGCAAGGAAGAGCAACTAAGAATAAAATAAGTATAAAAAATTGTTGCTTGAGGGGGGACGACTGGCATCCNNNNNNNNNNNNNNNNNNNNNNNNNNNNNNNNNNNNNNNNNNNNNNNNNNNNNNNNNNNNNNNNNNNNNNNNNNNNNNNNNGCATGGTGAGACGGTGGGGGAGTGCGGGCTCTATCCAGGAAATGATAGCAGGGAGTTGGGAAGTGATGGTTTGGGTATAATAATGC	12531:75:-
smaw_01_16316020	C01	16316020	309	-	G	A	GCAGCTCCAGGTATCGTGGCTGGACTGTGTACAGATCAATTTCATTCCAGCATTTGAAAAACGAGGCTCCTCTACCATGACAAAANNNNNNNNNNNNNNNNNNNNNNNNNNNNNNNNNNNNNNNNNNNNNNNNNNNNNNNNNNNNNNNNNNNNNNNNNNNNNNNNNNNNNNNNNNNNNNNNNNNNNNNNNNNNNNNNNNNNNNNNNNNNNNNNNNNNNNNNNNNNNNNNNGTAAACACACATATACGCGCGCGAGCGAGCGAGAGAGAGGGAGACTCACAGTACACATCCAGGCGGTAGTGGCGAATCCTCCTCTGTCCCGCCAGTGCCGGGTGGAAGGCCTCGCAGCTCAGTGCCGCCCCATTGT	12541:309:-
smaw_01_16328673	C01	16328673	183	-	T	C	CGTACACGTACGCTCATGATGCAGGGCAAAGGAAGGTTGAAGCCGAAACAGGGTGTGCGCAGGCAAGGCCACCAGAGAGCGATCANNNNNNNNNNNNAAGTGGAGGACAACAAAGGAGAGCAGGAAAGGACGTGGAGAGGTGGAGCGAGATGGAGGCAGAATATAAAGGTACGTGTGTGTGTATGTGT	12547:183:-
smaw_01_16328908	C01	16328908	45	+	C	T	CACTTGGGTATGCACCACGTGCAACCACCCACTCCCTTTTTTTTCCTTATCACGGGCTGTTTGAGGCCCCCCACACACACTGCACNNNNNNNNNNNNNNNNNNNNNNNNNNNNNNNNNNNNNNNNNNNNNNNNNNNNNNNNNNNNNNNNNNNNNNNGTGTGGTTTGGGATGGGTCTCTTGGTGGGTACTGTTAATGAGTCCGTGTTAAGAGTTTAAGGAACTGGCGGTGCGTCCAACCTTTA	12548:45:+
smaw_01_16337764	C01	16337764	202	-	C	T	CAGTTAATGAGTCATTTTGTATTTTTAGTGGGAGACGAGTGTCCAGTGTTCATTTCTTGCTATAATTCCAGCAGTTTCAGTATAGNNNNNNNNNNNNNNNNNNNNNNNNNNNNNNNNNNNNNNNNNNNNNNNNNNNNNNNNNNNNNNNNNNNNNNNNNNCCTGTGTGTGGTTCTGGTGTGCTGGGTGGGCTCCGTACTGTCGTCCTTTGCGCAGTTCTTCAGCTCGGACCTCCTCGACACCTGGA	12554:202:-
smaw_01_16341926	C01	16341926	285	+	T	A	TTTTACCGTCGTAACGCGCTCAGGTAGCACAGAGAACACTCCTTTATGAAGTGGTCGGGCATCGCGTGAGGTCAGGAGACGCGTTNNNNNNNNNNNNNNNNNNNNNNNNNNNNNNNNNNNNNNNNNNNNNNNNNNNNNNNNNNNNNNNNNNNNNNNNNNNNNNNNNNNNNNNNNNNNNNNNNNNNNNNNNNNNNNNNNNNNNNNNNNNNNNNNNNNNNNNNNNNNNNNNNNNNNNNNNNNNNTATATATATATTTGTGTCTGTGTACATCGTGATCCTGATGAATTGAGTGTTGGTGTGTGGGTTCACGACCAAGACGGGGCTCTCG	12557:285:+
smaw_01_16345963	C01	16345963	55	+	T	G	ACCTTAGCAGACGATGCTTTTTTTTTAAAGCACTTGTCCTTGGGCAAATCTTCCTCTGCCAGCCAAGTGGCGACAGACTTGTTGGNNNNNNNNNNNNNNNNNNNNNNNNNNNNNNNNNNNNNNNNNNNNNNNNNNNNNNNNNNNNNNNNNNNNNNNNNNNNNNNNNNNNNNNNNNNNNNNNNNNNNNNNNNNNNNNNNNNNNNGAATTTCATGCTTGGCGAGTCTGCCGTATGGCACCAGTTTTCTCCTTGTTTACCCATGCTAATGAGCAGTATGCTAATGAGCAGCCTGGCCCCNNNNNNNNNNNNNNNNNNNNNNNNNNNNNNNNNNNNNNTCCTCATGAATCCCCCTTGTGTTTTGTCGTTTCTGTTTATTCTTTTTTTTTACCATTTCATGCAA…	12561:55:+
smaw_01_16406676	C01	16406676	167	+	C	T	AAAACAGTGCAAATGAATCCAATGGAGGAATTTTCACCTGTTCCCCGTCTGTCCGTGTCCGTCCAGATCCATCCGAGAAAGCGACNNNNNNNNNNNNNNNNNNNNNNNNNNNNNNNNNNNNNNNCACTGTGAAGATGAAGTGTGAGACCGATGGAAACCCTCAGCCCGAGATTGACTTCACTAAGGACGTACGTGCTGCATTTCATGTACAAAGANNNNNNNNNNNNNNNNNNNNNNNNNNCCCTCTCTCTAATAATACCTGTCCTTCCATCTCCAGGGCAAAGACATTACTGGTCAGGGCGGACTCCTGACACTGAAATCTGTCA	12598:167:+
smaw_01_16471313	C01	16471313	238	-	C	A	GCGCTTATCTGTAGCACTGACTACAAGAAAAAGGGGATCACATTTCAGAAAATACAGCAAATTTAACTCTGGTGAAAGAATTTTANNNNNNNNNNNNNNNNNNNNNNNNNNNNNNNNNNNNNNNNNNNNNNNNNNNNNNNNNNNNNNNNNNNNNNNNNNNNNNNNNNNNNNNNNNNNNNNNNNNNNNNNNNNNNNNNNNNNNNNNNNNNNNNNNNNNNNNNNNNNNNNNNAAGCTAGGCTACGCGAGCTAGCTACATGCGAGGTCTCTTCTACAGCTGGTGAGGTCACCGCAGTTGCCGCCGTCATCGTGCAAATTAGCGGGTTCACCCGGGTGTGACGTTCACATCAA	12640:238:-
smaw_01_16492020	C01	16492020	308	-	C	A	TGAGCCAGATCAGCATTCAGCTCAGCAAGCACCTCGGGGGCGTCAAGGTTATGGCGACCACGGGTGGCACTAACTTGAGGGATGANNNNNNNNNNNNNNNNNNNNNNNNNNNNNNNNNNNNNNNNNNNNNNNNNNNNNNNNNNNNNNNNNNNNNNNNNNNNNNNNNNNNNNNNNNNNNNNNNNNNNNNNNNNNNNNNNNNNNNNNNNNNNNNNNNNNNNNNNNNNNNNNNNNNNNNNNNNNNNNNNNNNNNNCACTGCCCAGAAACACAAGGCTGTCTTCAGTAGAACTGGTTGTGATGTGCTTTTTGTGTCTCCTCCGATCATAACAGTGCATGTA	12651:308:-
smaw_01_16494814	C01	16494814	4	+	A	C	GAGAGCGCGGAGGTGGCAGTCTGCAAGGTGCTGTGAGCGTTGCGGATCGGCCAGAAAAAGAATCCAGGTTACCTGTGGGGCAAGANNNNNNNNNNNNNNNNNNNNNNNNNNNNNNNNNNNNNNNNNNNNNNNNNNNNNNNNNNNNNNNNNNNNNNNNNNNNNNNNNNNNNNNNNNNNNNNNAAATTTTTGACTTCCCCTCAGAATAACATCTCTGAATTAAAGCAGACACAGAGGCGAGACACTGAGTTACTTTGAGACCAAATTTGAAAATACATAACCGGAC	12652:4:+
smaw_01_16538678	C01	16538678	36	-	C	G	GCCTGGATCTCCCCATCCTGTCTGAGCGTGACTGTGAGAACGCCTACCCTGGCATGATCACTCAAGCCATGTTCTGCGCTGGTTANNNNNNNNNNNNNNNNNNNNNNNNNNNNNNNNNNGAATCACTGTTCAGGCAAAATACAGCAAATAATGACTTGGTATGACTTGCTCAGTCTAACTGCATAATTTCTCACTCTTCTTCTC	12675:36:-
smaw_01_16543733	C01	16543733	145	+	G	T	GCCTGGATCTCCCCATCCTGTCTGAGCGTGACTGTGAGAACTCCTACCCTGGCATGATCACTCCAGCCATGTTCTGCGCTGGTTANNNNNNNNNNNNNNNNNNNNNNNNNNNNNNNNNNNNNNNNNNNNNATCAGCAGAGTGCAGTGCATGTCAGTGGCCTTGTTCATTGAAATAATTCATTTTGGTCTGTTTTTTAATTGTTCTCATTTTCTCTCTCT	12678:145:+
smaw_01_16579441	C01	16579441	70	+	T	G	TCGTCGTCGTAAACGACTTGAGTGGGCAAATGCTCACATTCGATGGCATCTGGCAATTTGGAGAGGTGTTGTGCCATTCATCCACNNNNNNNNGTCGCAGCATGATAATGCACGGCCCCATGTTGCAAGGATCTGTACACAATTCCTGGAAGCTGAAAACATCCCAGTTCTTGCATGGCCAGCATACTCACCGGACATGTCACCCATTGAGCATGTCTGGGATGCTCTGGATCGGCGTATACGACAGCGTGTCNNNNNNNNNNNNNNNNNNNNNNNNNNNNNNNNNNNNNNNNNNNNNNNNNNNNNNNNNNNNNNNNNNNNNNNNNNNNNNNNNNNNNNNNNNNNNNNNNNNNNNNNNNNNNNNNGTCTTAGATCTTTGAGTTCAGCTCATGAAAAATG…	12702:70:+
smaw_01_16581705	C01	16581705	79	+	C	T	AGTGACTAGATTAATCCAAATGAATGAATACAAAACTTGTAAAAAATCCTTCAGCCCCACTGGACACTGATGCCTGGCCGCTGCGNNNNNNNNNNNNNNNNNNNNNNNNNNNNNNNNNNNNNNNNNNNNNNNNNNNNNNNNNNNNNNNNNNNNNNNNNNNNNNNNNNNNNNNNNNNNNNNNNNNNNNNNNNNNNNNNNNNNNNNNNNNNNNNNNNNNNGGATTTACTGCCACTCTCTGGAGTCCTGTGCTGCTGTGCGTTAAACGATGGGACACTTTTTATTTCTTTCCCTCTTGAACCTTTG	12704:79:+
smaw_01_16594822	C01	16594822	69	-	G	T	TCAGATCTCAGTGTGGCTTTGTGTGTACTGCCCACGTGTCTTCATTAAGCCAATTTATTTCAGTGATACAATCACAACAACTCTCNNNNNNNNNNNNNNNNNNNNNNNNNNNNNNNNNNNNNNNNNNNNNNNNNNNNNNNNNNNNNNNNNNNNNNNNNNNNNNNNNNNNNNNNNNNTCCCATTCATATCAATTCACCTGCTCGGAGCAGCGGGGCTTTTGACAGTAATTGTTAATTGTCGGCACCTTAAATCTGGCTCCAAA	12709:69:-
smaw_01_16599550	C01	16599550	232	-	C	T	GTAGACAATCTGCTTCCTGTTAACACTGGTACGTGCATGCCCAGTGTACGTGAATTGTCACGTGTTATGGAGCTGAAATTCTTCTNNNNNNNNNNNNNNNNNNNNNNNNNNNNNNNNNNNNNNNNNNNNNNNNNNNNNNNNNNNNNNNNNNNNNNNNNNNNNNNNNNNNNNNNNNNNNGAAAGCTTACTTAAACAGGTTTTTAAGTAAGCAGGTTTGTGGCCCCAACGATTGTCCTATACGCTGACGTGGTCGTCCGTGGCTAAGTGCGATCT	12713:232:-
smaw_01_16649689	C01	16649689	77	-	A	G	ATTGACACGTGTGGTCTCCTCCGATTGCCGCATGTACGCTTTAGATGCTCACTTGGGGGTGAGGTCACCGCTTGACTCCTCATCTNNNNNNNNNNNNNNNNNNNNNNNNNNNNNNNNNNNNNNNNNNNNNNNNNNNNNNNNNNNNNNNNNNNNNNNNNNNNNNNNNNNNNNNNNNNNCATGTAAAATAGACTCAGTAGTTAAAAGGCAGCAGCGTGTAACCTGGTGGACATATGCAATGCTAAACTGTGATGCTACTTAGTTT	12742:77:-
smaw_01_16705517	C01	16705517	259	-	C	T	GGCGTAGACTAGAGGAGAAAATGTTGACAAGCGCATCGAATTTCTTTTTGGTGAAGAACCAAAGCCAGGCTGACAGGTGGGGCTCNNNNNNNNNNNNNNNNNNNNNNNNNNNNNNNNNNNNNNNNNNNNNNNNNNNNNNNNNNNNNNNNNNNNNNNNNNNNNNNNNNNNNNNTAGGAAACTGCTGTGATTCCTCTACTTTCAGACTTGAATCCTCGCAGCTTTCCTGGGCACCAGAATCTCCTTGAGGGGGTCGGTTCGGCTGCTTGTTCTGTGGGGATTTGCTGCATGATTCAAGTTGAGTATCCTTTGGGGTCAA	12775:259:-
smaw_01_16711703	C01	16711703	287	-	G	T	TTTCAAGTCCTCCTGAAAGAACCTCCTGTAGATAATTTGTTCATCAATACCAGAGTTTTGTGCTTATTCCAAACCACATTGTATCNNNNNNNNNNNNNNNNNNNNNNNNNNNNNNNNNNNNNNNNNNNNNNNNNNNNNNNNNNNNNNNNNNNNNNNNNNNNNNNNNNNNNNNNNNNNNNNNNNNNNNNNNNNNNNNNNNNNNNGCTCTATTTCGGAGGTATTCAAACGACCACGGTGCACGGGGAGCCAATATTTATAGAGGCTTTAACAGGTTCATTATCGTCAGCGGGGATGGTTCCACCGGGGGCAGAGGCGC	12778:287:-
smaw_01_16712906	C01	16712906	171	-	C	T	GCTGCCTACTTGATGCAGAGAGAGCGAATTTGTGAACTCGTATGTTTGGTGGAGATTATGTTTGCAAGCTTTCGTGTTGCGTTCANNNNNNNNNNNNNNNNNNNNNNNNNNNNNNNNNNNNNNNNNNNNNNNNNNNNNNNGTGCGGCTAACATCCTTGAGCACTTTTGCCGTCTACATCTTTCACGTCATGACTCCACCATTTCTGAGACCACTACCGCACTATCAGTCTTT	12781:171:-
smaw_01_16736931	C01	16736931	212	-	C	A	GTCTCACTGCTCCATTAGCTGATCTCAGGTCTCCCTCTAAGCTCTGCTAGTGCCAGCTCATTGATTCCTTAACTAATCGCTCTAANNNNNNNNNNNNNNNNNNNNNNNNNNNNNNNNNNNNNNNNNNNNNNNNNNNNNNNNNNNNNNNNNNNNNNNNNNNNNNNNNNNNNNNNNNNNNNNNNNNNNNNNNNNNNNNNGCACTGTTTCTTGGGCTTCATTTGTGCCATTGTGTACATTTTTTTCTTTCCCCCCTAAGAAGTTACAACAGCACACACAAAATTA	12792:212:-
smaw_01_16762969	C01	16762969	202	+	T	C	TATGGAGACTGTGGCAAGGTGGAGGGCAAGGCAAAGGGGGTGAAGACTCCACCTGCATGGGTGAGACGTTGAGAAGGGCGTAGCTNNNNNNNNNNNNNNNNNNNNNNNNNNNNNNNNNNNNNNNNNNNNNNNNNNNNNNNNNNNNNNNNNNNNCACAGTCATATGTTTTTACTGGAACACTTCACGAGAGTGCTCTAAATCTGGGTTTCAAGAACTCAGCAGAAAAGTTAAGAAAATTNNNNNNNNNNNNNNNNNNNNNNNNNNNNNNNNNNNNNNNNNNNNNNNNNNNNNNNNNNNNNNNACATGCACTTTCCAGAAGCAGTACACTTGGGGCAGTCGGAGGCCTCACAGCTGGTCTCAGTGCAGTTGCTGGACAGGAAGATCTC	12825:202:+
smaw_01_16766397	C01	16766397	15	+	G	T	ACAGCTGTCAATTTGCTTGTACTCACTTTACAGTTTGTGTGGGAGTCTGGGTGTAGCGTGAGGGCTACAGGGGGACACAGCTGCCNNNNNNNNNNNNNNNNNNNNNNNNNNNNNNNNNNNNNNNNNNNNNNNCAATGAGAAAGTCCTCCTTTCCCTTCTGTGCCACTGCGCCATCCCAGAGATGAGGAGAGAGGCATGGTGGATGATGAGGTGGAGGAGAGCAGTACTGACCGGTCGGGNNNNNNNNNNNNNNNNNNNNNNNNNNNNNNNNNNNNNNNNNNNNNNNNNNNNNNNNNNNNNNNNNNNNNNNNNNNNNNNNNNNNNNNNNNNNNNNNNNNNCATCAGTATTATACTATAACCTCCGCTCCTTGGTTTCAAATTGTTTTCAATGAGTGTAGA…	12829:15:+
smaw_01_16771448	C01	16771448	51	-	T	A	CAGCTGAGATTGGACAGGCTGCTCAGATGATCATTTGACTTGGCTGTCCAATCGCATACTATTTTTCGGCGCAGTGCAGCCATGTNNNNNNNNNNNNNNNNNNNNNNNNNNNNNNNNNNNNNNNNNNNNNNNNNNNNTTCAGCACAGTAGTACACTTTAGGAAACTGCTGCATTGTGAGCTATTAGGAGGTCAGATCTGTTTTCTTTTTGTGTGCTGACCTCNNNNNNNNNNNNNNNNNNNNNNNNNNNCGTGCCGTGTGGACCAGATCTCAGGGGCGTACGGCTGGTGGGGGGAGCGTACCCTTTTCCTAACCTCCCTCCACTCCTGTCGCACC	12830:51:-
smaw_01_16789055	C01	16789055	59	+	C	T	GTTCACTGCTGGAGACAGGTGGCATAATCATAGTGAACGGAGATATGTCATGGTTGGACGGCATAGAAGATATTTATAACGACTCNNNNNNNNNNNNNNNNNNNNNNNNNNNNNNNNNNNNNNNNNNNNNNNNNNNNNNNATGGATTTCGAGGCGCTGTTCATCCCTGCGCTGTACTCTGTGGCCTTTGTTGTGGGCATCCTGGGAAATGGAGTGCTGCTGGGAGT	12845:59:+
smaw_01_16852107	C01	16852107	221	-	T	A	GCAAGAGAGTAAACACACAAAAAGGTATGAATGACAATCAGTAGCTCAGTGTGAAGGCTAATAATGGCTTGGAACCAGTCAAAAGNNNNNNNNNNNNNNNNNNNNNNNNNNNNNNNNNNNNNNNNNNNNNNNNNNNNNNNNNNNNNNNNNNNNNNNNNNNNNNNNNNNNNNNNNNNNNNNNNNNNTGAAAGCGGCTGAGTATGACTCACAGCTTATGGAGAGGTTCAGTGGATCACTGGTGCCATTGCTGACAGGATTGAACGCACGACACCTGAACGGTCCCCGGTCGTAGCGGGTCACATTGACTATAGTGAGATTGGCGTTTCCAGCGGTGAGC	12885:221:-
smaw_01_16854070	C01	16854070	231	-	A	G	CTGGGATGTTTGATTTCTCATAGTGATGTTGTTAAAGGCCCGACAGCTGTAGTTCCCGCTCTGACTCGTGCGGATGTCGGTCAGTNNNNNNNNNNNNNNNNNNNNNNNNNNNNNNNNNNNNNNNNNNNNNNNNNNNNNNNNNNNNNNNNNNNNNNNNNNNNNNNNNNNNNNNNNNNNNNNNTCTGACCCTTCGTCATAGTATTCTTGTGATGGAGACATGGTCAGATTAATATTTTCTGGGCCCACTGTGGCAAGAAAACAGAAAAAA	12888:231:-
smaw_01_16893241	C01	16893241	67	+	T	C	GCTGTGATACGCTAATGCTACAATCCATAAATGCTCTATTTCACAATGCCCACTGCTGAAGCATCCTTGGCTTGGCCCCAAACCTNNNNNNNNNNNNNNNNNNNNNNNNNNNNNNNNNNNNNNNNNNNNNNNNNNNNNNNNNNNNNNNNNNNNNNNNNNNNNNNNNNNNNNNNNNNNNNNNNNNNNNNNNNNNNNNNNNNNNNNNNNNNNNNNNNNNNNNNNNNNNNNNNNNNNNNNNNNNNNNNNNNCAGTCAGATTCCTCGAGCGTCATCTAACAAGTGCAGCCCGTCGTCCTCTGCGTGACCCCCGTTGGCTTGAAAGCAGTGCAGACACAAGGAATGAAATCCCGTCCGTGACCGGTCCGTGATCGGG	12905:67:+
smaw_01_16909925	C01	16909925	13	+	A	G	TCATAAATGTCCACCTCCACTCGGGCTCGGGACGGGCCCTCCATCGCACTGTTGATGTTCTCCCTGGCCAGGGCTAGTGCCAGCCNNNNNNNNNNNNNNCACACAGACTGGTCATCCAAGATTGCAGCTGGAGAGGCAGAGAGGGAAGGAGAGAAAGGTGAGGAGGATGGGAGGAGAGGAGAGA	12913:13:+
smaw_01_16942894	C01	16942894	205	+	C	T	CACAATGATTACATGCTGTATGTAAATCCATTGAGCAATAAGGCAGGTTATCCCCTTTCCGAGGCCCCGTTGATATTAACATAGANNNNNNNNNNNNNNNNNNNNNNNNNNNNNNNNNNNNNNNNNNNNNNNNNNNNNNNNNNNNNNNNNNNNNNNNNNNNNNNNNNNNNNNNNNNNNNNNNNNNNNNNNNNNNNNNNAACTTCCGCTGATGCAAATGATAGCTGCGTTTGTTTTGTTCCTCATTAGCTGGAGTGGGCAAAGGTCCGACACTGTCAGGTAAACAATGAATCTTCACTGGGGAACCAACATATAACTG	12948:205:+
smaw_01_16964824	C01	16964824	194	-	T	C	GGCCCATTATAGGCTTAAAGTGCAGTTTATGGCTTTTCTCCCACCCAGTGATTGCTGACAAGGTGTTTGAAACTACACACACACANNNNNNNNNNNNNNNNNNNNNNNNNNNCATGTCATGGAGGGAGAAATGCTGATGATTGTGCGGGGAACTGAAATGGGAAAATGGCTGCGTTTCTGCCGAGTGAGAAGCATATCTGGAAATCGAGGGCTCCTCGGG	12968:194:-
smaw_01_17010513	C01	17010513	65	-	T	G	CTGAATGGAAGGACTCTCTCCCCTCCTCTCCCCTGTCCGCCGCCGAACCCGCACTGCCACCACCACAGACCGACAAAGACGGCCCNNNNNNNNNNNNNNNNNNNNNNNNNNNNNNNNNNNNNNNNNNNNNNNNNNNNNNNNNNNNNNNNNNNNNTAACACCTTTGTGAATCATTTACGTAAGGTTGCAGAAAACTATTGTTGGAGAGTGTATATATACTGTACCTCTTTGTTTGTGTGTGTGTGTTTGTTGGTCTGGCAGGGTGCTGTCGGAAGTTTATTTCGAGGAGCGC	13002:65:-
smaw_01_17037421	C01	17037421	38	+	C	A	AATGTTGTACCAGTGCCCCTCATTGTAGTAAAGACGCCGAGGCCTTGACTGTGTTAATCCTGTAGCTACTGGAAAAGAAAGGAAGNNNNNNNNNNNNNNNNNNNNNNNNNNNNNNNNNNNNNNNNNNNNNNNNNNNNNNNNNNNNNNNNNNNNNNNNNNNNNNNNNNGTCATGCTCAAGGCCTCCCAAAATGCTCCAGGCTTTGGCTGATAAGCCAGCGGCGGGCATATGTGTGTGTGTATTCACATTCTGCA	13019:38:+
smaw_01_17042248	C01	17042248	186	-	C	T	TGTCTCAACTCTTAAGTGACAACACGTTCACGGTGCCACATACACGTCCACCACTCGGGACTCGACCCTCCGTCTCTTCGTTTTTNNNNNNNNNNNNNNNNNNNNNNNTAAACGCGGGGTTAGTCGAGTTCGCCAGACCACGCCCCTTCAGTCCAGCTGGTGGCAACACTCATGATGACATCACCGCCGCGCGCGCCCAT	13026:186:-
smaw_01_17125690	C01	17125690	58	+	T	C	CAGGAGCTGCGCCTGAGCCTGTTGCAGCAACAGCTGCTGCTGTGCTGGCAACAGAGCTGTCAACTGGCGAAGGGAAAGAGGAGAGNNNNNNNNNNNNNNNNNNNNNNNNNNNNNNNNNNNNNNNNNNNNNNNNNNNNNNNNNNNNNNNNGAAGGAAACAAAGTGTTCAAAAACAAAAGGCACATGAGAAGCCAGCAAGGTAAAAGCAAAGCAGTGTGTTTGTGTGTCTGTGTGTNNNNNNNNNAAGTCTGAGTCTTACCCCTGCTAGTTGGGAGCCAGTCAGCATGAGCTGTGTATGTTGCAGGGCCGTCTGTGAGGGGGTCGGGCCGTGAG	13071:58:+
smaw_01_17144404	C01	17144404	191	-	G	A	GATGATGAGAGTTTGCCGAGGTCAGCGTGGCATGGCGGTTCTTTTGCTGTGGGCATGGGCACTGTGTTTTGTTTCTCCGACACCTNNNNNNNNNNNNNNNNNNNNNNNNNNNNNNNNNNNNNNNNNNNNNNNNNNNNNNNNNNNNNNNNNNNNNNNNNNNNNNNNNNCTCCGAGCACCCATATACATTAACAGCTAACATTTCAACATACCAGGCTCTTTGTCCATCAACATGTTTTTCCATCAATATTTCTCCATGTGCTAAAACCGGAGACCCGAGGCCATCGCTGGCT	13080:191:-
smaw_01_17158410	C01	17158410	190	-	A	G	TGTCATCTGTCATACGTGAAGTGGAGGGAGAAGGACAATAAAACTTGGTTGTCTACTACAAGGCATGACACATTTTTCATAATTANNNNNNNNNNNNNNNNNNNNNNNNNNNNNNNNNNNNNNNNNNNNNNNNNNNNNNNNNNNNNNNNNNNNNNNNNNNNNNNNNNNNNNNNNNNNNNNNNAAATCTATTATTTTATGTACAGTTTTCCATTAAAACAGACCTAATCATCCGCAGCATTAACTGAGCAGGTATAAACAGTCCTGCG	13090:190:-
smaw_01_17173725	C01	17173725	57	-	G	A	AGTGGCACCCTGACCCCCCGTCCCGCACCTTATCGACTTGAAACAGACCGCGCGACCGATACAGTCAATTTTATGGTTTATGTTANNNNNNNNNNNNNNNNNNNNNNNNNNNNNNNNNNNNNNNNNNNNNNNNNNNNNNNNNNNNNNNNNNNNNNNNNNNNNNNNNNNNNNNNNNNNNNNNNNNNNNNNNNNNNNNNNNNNNNNNNNTTGGTACAGGCGGTGTCGAGCACCACGGGCCAAACGAAATGAATCCATTTTCTGCACACGACTCCCCTCCCGAATGGCGCGGCGGCTCCTCCGCGGTCCGGTGCACAATGCGGTAATGACCAGCGGGTCAAAGGTCGCCTGGCCAGT	13102:57:-
smaw_01_17217765	C01	17217765	6	-	C	G	CAATAGAATGACTCACCTCTGCTCATAGAGACACACGCACACAAAAACACACTCATTTCTTGCATCCCTCGCCCTGTTTGTATTANNNNNNNNNNNNNNNNNNNNNNNNNNNNNNNNNNNNNNNNNNNNNNNNNNNNNNNNNNNNNNNNNNNNNNNNNNNNNNNNNNNNNNNNNNNNNNNNNNNNNNNNNNNNNNNNNNNNNNNNNNNNNNNNNNNATGGTTACAGTGGTTGCCCTCCAAACATACTCCCTCATCAGACTTGTTCACATCAAGAGGACAAAAGGCACGGTTTAGTTTGGTCNNNNNNNNNNNNNNNNNNNNNNNNNNNNNNNNNNNNCAGATGTGTGGAGCCCCAGCCTAATAGAATTATTGATATTTTAACACGCTTTAATGAGCCAA…	13127:6:-
smaw_01_17221452	C01	17221452	10	+	A	T	CCAGTCCCTAGGTACAGTATCTGCCCTTCCCCTCTCTCTCTTTCTCTCTCTCTCTTCCTCTATCCCTCTTGCTCTCTCAGCAGTGNNNNNNNNNNNNNNNNNNNNNNNNNNNNNNNNNNNNNNNNNNNNNNNNNNNNNNNNNNNNNNNNNNNNNNNNNNNNNNNNNNNNNNNNNNNNNNNNNNNNNNNNNNNNNNNNNNNNNTGGAGCTGCATCGACGCAGAGAGCAGAACAATGTGCATCAACAACATGTGAATGTGTGTAACAACACGCCTCACAAGTCTCCTTAGAGATTGCTCTTCCGAGTATTTCTTTGTANNNNNNNNNNNNNNNNNNNNNNNNNNNNNNNNNNNNNNNNNNNNNNNNNNNNNNNAGCATCACTGCGGTCTCCATCACCCCTT…	13129:10:+
smaw_01_17243110	C01	17243110	85	-	T	A	TAATAAAGCAACGAGACTCCGAGACCGCAACGGCATCGGGGTATTAACTGCATTGAGGGGGGTTAACTGCTGGGGCAGAACTATANNNNNNNNNNNNNNNNNNNNNNNNNNNNNNNNNNNNNNNNNNNNNNNNNGTGTTTTCTGGGTCTGGCCTTTGCCTCACTTGTGCAAATCCAGTGCCATCCATGGTAGCAGCAAACAAAACATAATGAGGGATTG	13142:85:-
smaw_01_17248562	C01	17248562	9	+	A	C	CGGTGGCTAGAGTTTCTACTTTCTCTTTCTTTCCTTTTCAAAATAGTTTTATTCATTCATTGTCTACCGCTTTATTCCTTTAAGGNNNNNNNNNNNNNNNNNNNNNNNNNNNNNNNNNNNNNNNNNNNNNNNNNNNNNNNNNNNNNNNNNNNNNNNNNNNNNNNNNNNNNNNNNNNNNNNNNNNNCGGACAACCATTCACTCTCACATTCACACCTACGGTCAATTTAGAGTCTCCAATGAACCTAACCCCATTCTGCATGTCTTTGGACTGTGGGAGGAAGCCGGAGAACCCGGAGAAAACCCACGCATACACGGGGAGAACATGCAAACTCCACACAGAAAG	13145:9:+
smaw_01_17272905	C01	17272905	73	-	C	A	TCGTGAGGTCAAATGCAGGGTGACCCATTGCCAAGGGCAAGGATGACTGCACTTACCCGCTTTTCTTATCATGGCAGTTTTTACCNNNNNNNNNNNNNNNNNNNNNNNNNNNNNNNNNNNNNNNNNNNNNNNNNNNNNNNNNNNNNNNNNNNNNNNNNNNNNNNNNNNNNNNNNNNNNNNNNNTCGAGAGGTGGAGGGAGAATAGGAGAGCGACACAGGAGGCAGATGACAAAAATAGAGGCAGTGTTTAGTGTTTGACCAACGTCTG	13152:73:-
smaw_01_17381900	C01	17381900	254	+	G	A	TAAGGTGGCCGCGAATGCTTGGGTATCTTCCATATTCACACTCATTTCCAAGGGGGCAAAAGTCTGGGTGCTCTCCATGGCCAGANNNNNNNNNNNNNNNNNNNNNNNNNNNNNNNNNNNNNNNNNNNNNNNNNNNNNNNNNNNNNNNNNNNNNNNNNNNNNNNNNNNNNNNNNNNNNNNNNNNNNNNNNNNNNNNNNNNNNNNNNNNNNNNNNNNNNNNCTGCTTTGGCCGTCTCTGGTCTGAAGAATGAAGGACTGTGTCTCGGCCACAACAAAATGCTCGTCCTCCTGGCTGTCTGAGCAGG	13206:254:+
smaw_01_17431282	C01	17431282	229	-	C	T	AAAACAACTTATGCCTGCCCTTGGAGTGTGTCTTCAGTAAGAACAAGGGACCAGTGGCCCCGCAGGGATCAGAAATTCACTCACANNNNNNNNNNNNNNNNNNNNNNNNNNNNNNNNNNNNNNNNNNNNNNNNNNNNNNNNNNNNNNNNNNNNNNNNNNNNNNNNNNNNNNNNNNNNNNNNNNNNNNNNNNNNNNNCTCTCCAGGACACAGAGGGTAGCGGTGCGTGCGACCTCACCACCGTCCTCACACACTGATTGAAATCCAAAACAAAGAGCTCATTA	13233:229:-
smaw_01_17507264	C01	17507264	164	+	C	G	CAGCGGAGAGGGACAGTCATCGGACAGTCTACAGTACAGAGAATACGTCGTGTAAAACCACGTTTCTGTCCTGAAAGACTGTGGCNNNNNNNNNNNNNNNNNNNNNNNNNNNNNNNNNNNNNNNNNNNNNNNNGTGCTCACCGATCTTCAAGGTGATGGCAGCCGACGTCAGCCGCGTTTTGCCCTGCCACAAAGCACACCGCCAATTTCCTCCATCG	13268:164:+
smaw_01_17528539	C01	17528539	244	-	C	T	TGATATTACTTCTAACCAGTGTTTGTTCCTCAGAGTAATGTTCTGGACCGTGCAGTGGACTGGATCTTCTCGCACCTGGATGACCNNNNNNNNNNNNNNNNNNNNNNNNNNNNNNNNNNNNNNNNNNNNNNNNNNNNNNNNNNNNNNNNNNNNNNNNNNNNNNNNNNNNNNNNNNNNNNNNNNNNNNNNNNNNNNNNNNNNNNNNNNNNNNNNNNNNNNNNNNNNNNNNNNNCCCCAGATTGTGTCCTTACCAATTAGTTGCAGAGAAGTGATTGAAAAACATCTGGAATGTTGACAATATCCCTGCTATCTTAAGT	13275:244:-
smaw_01_17541882	C01	17541882	72	-	C	T	TTGTCCAGAGAGGCCGCGTCGGTGGGGTAAAACAGGAGAAGAGAGCGCAGAGTCTGCACTGCTCCACTAATGTCACCAGCTGTTGNNNNNNNNNNNNNNNNNNNNNNNNNNNNNNNNNNNNNNNNNNNNNNNNNNNNNNNNNNNNNNNNNNNNNNNNCCATCGTCACGTTGAACTTTAAACCCTGACCTTTAAACTGTGCAATGTGCAGATGCTCCAGCTGAGTGGGCAGGTAGTTCTCTTGGGCAGAAATCCTTCCGGGTCGTGTTGCAACCTGAGT	13289:72:-
smaw_01_17580513	C01	17580513	12	-	T	C	GCCCGAAGAGAAGCAGAGGGAGATACTCAACAACACCATTCCAGAGGGTAAAGACTCAGGTGACCTGCTTGTTTTCACTCTTCTGNNNNNNNNNNNNNNNNNNNNNNNNNNNNNNNNNNNNNNNTTGTTGGATTGGATTGGTTGGATTTTCACTGGATCTCTGGTCTTCAGTGAAGTATGTAGGTGGTTACCACGGCCTGTTGTCTGGGG	13304:12:-
smaw_01_17604141	C01	17604141	31	+	T	C	CTCCCCTGTGGGGTCGCTTCTGGTGCAGGCTCTGCCCTCAGGTGAGCTCACCTGACGGGACAGGAAACACATGTTTCCAACAAGCNNNNNNNNNNNNNNNNNNNNNNNNNNNNNNNNNNNNNNNNNNNNNNNNNNNNNNNNNNNNNNNNNNNNNNNNNNNNNNNNNNNNNNNNNNNNNNNNNNNNNNNNNNNNNNNNNNNNNNNNNNNNNTATGATGAAATTCTGTACTGAGGTACTGAGGAGGAGCTAAACAGTCCAAGGTCTGAATCAGCTGTTGTGTCAAGATAAGAGGAGC	13314:31:+
smaw_01_17614516	C01	17614516	257	-	T	C	GGGAGGGGGCCAACAGAAAGGGGAGGGCCACACTCGGGGGCAGGAGTGTCTCGAGGGACTGCAAGGGCCACAGGCAAAGGGGACTNNNNNNNNNNNNNNNNNNNNNNNNNNNNNNNNNNNNNNNNNNNNNNNNNNNNNNNNNNNNNNNNNNNNNNNNNNNNNNNNNNNNNNNNNNNNNTCTTCATTCAGAAAGACGTTTCACAGATTTGATCAACTCAAAATCACCAAAGATAACAATGCAGGTTCCTTCCCATTGAAATCTGGG	13327:257:-
smaw_01_17661418	C01	17661418	193	-	C	G	TATCTCTCAACGTGGAGCGAAGTGTTGTCAAGTGTCAGCGGCAAATTGTCACTGTCGACTTTGAAACGGCACGTAAGAAAAAAAANNNNNNNNNNNNNNNNNNNNNNNNNNNNNNNNNNNNNNNNNNNNNNNNNNNNNNNNNNNNNNNNNNNNNNNNNNNNNNNNNNNNNNTCTCTCTCTCTCTCTCTCTCTGTGTGTCGGTGCAAGGATCGACACCAGTCAGGCTGTTTGTGCGGCAGTTGTCGTCAATTAGTGTCC	13352:193:-
smaw_01_17665871	C01	17665871	279	+	A	G	CTGGCAGGCGCTGAAAAGTGACTTTGTGTCCTTACCCAACGGGGCCGAATGCACAAACATTGCACAAGAGTTTTGGAGAATGTGGAACATTCCCAATTGTTTGGGGCGCATCGCTGGAAAACATGTCGCGTTTAGAGCCCCTCCACATGCAGGAAGTGGCTACAAAATTANNNNNNNNNNNNNNNNNNNNNNNNNNNNNNNNNNNNNNNNNNNNNNNNNNNNNNNNNNNNNNTGCGCAACCTCGCGAAAGGACACCAATGCGGACCCCATGCCATGGGAAGTGACGCCGATGTGCGCACGGACTGATGCGTCAAGCATAAATCCAGCTTCCCCGGCCANNNNNNNNCAACAGTGTGGTAAATAGCGCACACGCTGTGGCATTTATTGACAGACAGACTG…	13355:279:+
smaw_01_17783309	C01	17783309	15	+	T	C	GACCGCAGCCTCCTTTAGAACATGCTGTTTGAAATGCAGAATGCTGCGGCACGTTGAAACCTTTAGGGAGTGCGGAATCTGAGAGNNNNNNNNNNNNNNNNNNNNNNNNNNNNNNNNNNNNNNNNNNGTCGAGGATTGCCTGTTTGATCGGCGAGGTGAGAGCGTGCAGAAAGTAGAGAAGTGCCTCCTTCTGCAAGCCCCCCTCCCTCCCT	13425:15:+
smaw_01_17800828	C01	17800828	42	+	C	A	CTCTTAAACCCACGCTCGCACATCGACAGCAGAGACAGAGACATGGCCAAGTCGCACCACTGACGCTCCGTCCTGAGGAGAGAAGNNNNNNNNNNNNNNNNNNNNTTAGGGACTAAACTGGATTTGAAACTATGTGAAGTGCATAGAAATTAGAGATCCTCAACAAAAAAACCTCATTAGCTCATTACTCATGAGTCTGGCTTCGCCCTGGCATTTGGACC	13441:42:+
smaw_01_17865133	C01	17865133	82	+	C	A	TCTTCGGTTGTTCGTTACGCACGGCTGCGCTGCTCCCTCTTTTTTTTTTCCTCCTCCATCTCCATCTCCCCGCCCCTCCTCCTCCNNNNNNNNNNNNNNNNNNNNNNNNNNNNNNNNNNNNNNNNNTGGTTCTCCTGTGACCGCAGGGGGGTATCCAGCACGGTAACTGTGTGTGTGCGAGGGAGGAAGGAGAGCACCAGAGGGAGAAAAGCNNNNNNNNNNNNNNNNNNNNNNNNNNNNNNNNNNNNNNNNNNNNNNNNNNNNNNNNNNNNNNNNNNNNNNNNNNNNNAATTATGCATTTGCTTACTGTGCTGCTGCTCAAGAGCATCACCTACCTGAGTGCAAAAAATACTGAGTGTGCCATCGCTTGAGAA	13477:82:+
smaw_01_17912451	C01	17912451	63	+	T	G	CCTGGATGAAGAACATCTTTGGTTTATTTTGTAGCATTGGACAGCGGGAATTATCAAAGGCCTCAAACACCCAGTCCAGCTGTAANNNNNNNNNNNNNNNNNNNNNNNNNNNNNNNNNNNNNNNNNNNNNNNNNNNNNNNNNNNNNNNNNNNNNNNNNNNNNNNNNNNNNNNNNNCATCAGAGAAACAGACCTGCATGAGCTGTCCGTCTGTGCCATACACGGCTCCTTCCACTCCGTGCGAGAGGAGACACACCACACA	13505:63:+
smaw_01_17915946	C01	17915946	243	+	C	A	AGCTGAACGAGCATCTCGTCCACCACCAGCTGTTTGCAGAGGACAGCGGAGCGTCTCTTGAGAGTCAGCCTGTCCCGCTCCAGCANNNNNNNNNNNNNNNNNNNNNNNNNNNNNNNNNNNNNNNNNNNNNNNNNNNNNNNNNNNNNNNNNNNNNAACACCACAAAGCAGAGACGACAACGAGGCGACAGGCGATGTCATCGACCCCGATGTCTCTCTCTTTTTCTTCTTCTTCTTTTTGCTTCAGTGTAGTTGTCGCCG	13506:243:+
smaw_01_17925849	C01	17925849	22	+	C	G	CTGCGAAGAAAGCAGGTCTGTCTGACAGTGAAATTAAGGAAGTGCTGGAGCTGTCCACCTCAAAGGAAATCAAAGACAAGCTGAANNNNNNNNNNNNNNNNNNNNNNNNNNNNNNNNNNNNNNNNNNNNNNNNNNNNNNNNNNNNNNNNNNNNNGAGGCGATATATTACAATGTAAAGAAATAAAATCCCCTCTAATGCATCTTCGCAGGCATTTGGCTTCCCGATGCTGGTGTGTCATGTTGATGGAAAGCCGGCAGC	13518:22:+
smaw_01_17953090	C01	17953090	248	-	C	T	ACCCCTCTCCTCGGGCTCCCCTCCCTGCCTTTCCTCTTCACTCTCACCCATTCTGTCATCCTCCTCCTGGCTCTCACCCTCTGTGNNNNNNNNNNNNNNNNNNNNNNNNNNNNNNNNNNNNNNNNNNNNNNNNNNNNNNNNNNNNNNNNNNNNNNNNNNNNNNNNNNNNNNNNNNNNNNNNNNNNNNNNNNNTCTGATTTCTTCCTCTTCTTTTTCTGATAATGTAACCTCCCCGCCCCCGTCTTGAGTAATTTTCACCTCTATATCTTCCTTTTCT	13532:248:-
smaw_01_17974699	C01	17974699	18	+	G	T	ACCAAAATGTGAACCACGGTGTTGCCTATAGGGAGAGGACAAGGAGGAAAAACAAGGGCGCGTAGACGGGAGGTACAAGAGGAGGNNNNNNNNNNNNNNNNNNNNNNNNNNNNNNNNNNNNNNNNNNNNNNNNNNNNNNNNNNNNNNNTGTTCTCTTACTCTCCAACGAGAGGCAACATTTTATACCTCGGTAATCCTGGACCCTGGTGCTGGCCCCTGCCTCGATCACCATGGAGATG	13543:18:+
smaw_01_17997250	C01	17997250	277	-	T	C	AAATTCTCTGAACCTCCTGTGTCGTCAGCAGGGCAGTGACCATGCTTTGTTAGTGACCGACACTGACTGTTGTCACATGTTTCATNNNNNNNNNNNNNNNNNNNNNNNNNNNNNNNNNNNNNNNNNNNNNNNNNNNNNNNNNNNNNNNNNNNNNNNNNNNNNNNNNNNNNNNNNNNNNNNNNNNNNNNNNNNNNNNNNNNNNNNNNNNNNNNNNNNNNNNNNNNNNTTTAAACATGCAAATCGAAACCTGATGAGGAATCAGAGGAGAGTCGCAGAAGGAGCACAAAGCGCTGCGGCGCTCAAAGTCTTTGCAGGGACTTGAG	13564:277:-
smaw_01_18009957	C01	18009957	210	+	T	C	TCCGCTCATCCGTGAAGAGCTGGAGGGGCATCAGGTGTGCCTCCCCATGCACAGGCCTCCCCCTTCGGTGCACTGTGTTAATCCANNNNNNNNNNNNNNNNNNNNNNNNNNNNNNNNNNNNNNNNNNNNNNNNNNNNNNNNNNNNNNNNNNNNNNNNNNNNNNNNNNNNNNNNNNNNNNNNNNNATCAGCACTTACACAGGCAGCCTGTTAGAGTGATAAATCACATGACCTGTCACTCACACTCTGTACTTGGTCAGCGTGCGTGTTAG	13573:210:+
smaw_01_18018590	C01	18018590	6	+	G	T	TTTTGGCCAAATCCTAGCATGAAAAGAATCAGTCAGCATAATCACATCCCCATACCTGTGCCACCAGGATGCCGATCACTACACCNNNNNNNNNNNAAGTGCCGAAAGCACCTCGGAGATGGGTGGGAGAGAGCTCGCCCACGTACATGGGTGTCAGTCCCGTGCACAGGCCGCAGAATGCACCGATGATCAACCGGGAAC	13578:6:+
smaw_01_18045811	C01	18045811	72	+	A	G	CAGATACTGTATATTAATCCTATTAGTGAAGGGAAACACACACATAAACACATGAAAACACTCTCCCCCCTACTTGGGTGCCCCANNNNNNNNNNNNNNNNNNNNNNNNNNNNNNNNNNNNNNNNNNNNNNNNNNNNNNNNNNNNNNNNNNNNNNNNNNNNNNNNNNNNNNNNNNNNNNNNNNNNNNNNNNNNNNNNNNNNNNNCACTCACACACCCACTGTTTTTCTGCCTTGTGTCAGCTGTTTCAGATGGGTCAAAAAGCCAGGGAACCGCACTGAGCGTGTTTTC	13588:72:+
smaw_01_18068131	C01	18068131	67	-	A	C	TGACGGTGATGACCCTGTGCTAGTGTTAGCAGCTGTAGTCTCTGTGGCGCTTTGTGCTCCAGCTGTTGTTTGACTCACAGGAGCCNNNNNNNNNNNNNNNNNNNNNNNNNNNNNNNNNNNNNNNNNNNNNNNNNNNNNNNNNNNNNNNNNNNNNNNTAATATGGGCTTAGTCAGTAGGGAGTTAGTTGACAGGGTGTGCGTTGTCGTGGCGACAGGAGTGTTTGCATTGTTATTGTTGTTGNNNNNNNNNNNNNNNNNNNNNNNNNNNNNNTGTGATACAGCTGGATATTGGGGTATCTGAGTCTGTGTTTGGTTTAGGACGGGTGAGAGTGCTTGGATTGTCTGGAGTACAGGCA	13600:67:-
smaw_01_18070967	C01	18070967	18	+	A	G	ATCCCTATTGTAGGTTCAGTGGCAAAACACCGCTGACTAAAAAGGTGCGCGTCTATTTGTTGGAAATGATTTACTTTTTGGTGGGNNNNNNNNNNNNNNNNNNNNNNNNNNNNNNNNNNNNNNNNNNNNNNNNNNNNNNNNNNNNNNNNNNNNNNNNNNNNNNNNNNNNNNNNNNNNAAGGAGGCGTCAACAGAGAAGGTCACCCCCGAGAGGGAACAGGCAGCAGGACATGTCTGGGTGGCGGACTGTGACGGGGAGATCCT	13605:18:+
smaw_01_18085779	C01	18085779	285	-	C	A	TTCCACGGTAACGCTGCCAAACAGAACACACAAATCATCTTGTTTAATTACGGTTGAGTCGCTGTGTGTTTGTTTTTATGCTGCGNNNNNNNNNNNNNNNNNNNNNNNNNNNNNNNNNNNNNNNNNNNNNNNNNNNNNNNNNNNNNNNNNNNNNNNNNNNNNNNNNNNNNNNNNNNNNNNNNNNNNNNNNNNNNNNNNNNNNNNNNNNNNNNNNNNNNNNNNNNNNNNNNNNNNNNNNNNNNCTGGCGAGATGTTTTCTCAATCCAATCGTGTTTTCTCTCCTTGTTTCCAGAGGCCACTGAGGCACCCAGAGGCGTGTTGCCAGCC	13617:285:-
smaw_01_18091120	C01	18091120	273	-	A	C	CCAGAAGAAGCACATCTATAATTGGACTGAACAATGCATCCTGATGGTGATGCCAACTGGCTCTTGGACCACGTCTGCATGATGCNNNNNNNNNNNNNNNNNNNNNNNNNNNNNNNNNNNNNNNNNNNNNNNNNNNNNNNNNNNNNNNNNNNNNNNNNNNNNNNNNNNNNNNNNNNNNNNNNNNNNNNNNNNNNNNNNNNNNNNNNNNNNNNNNNNNNNNNNNNNNNNNNNNNNNNNNNACGGATGACAGGGCGACCGCCATTCGGTTCAGTTCGGGGACAGTTGTCCTACATCTGTCACGGAAGACAATCTGTGGTTGAAGAA	13621:273:-
smaw_01_18215891	C01	18215891	5	+	G	T	TCCTGTGAGCATGCTGCCTGTATGAATTTGTGAGTTTCTTTGCATGTGTTCGTGCAGTGTGCGTGCGTGCGTGTGTGTGTGTGTGNNNNNNNNNNNNNNNNNNNNNNNNNNNNNNNNNNNNNNNNNNNNNNNNNNNNNNNGCTTGACACGGGGCAGTAAAGGCACGAGGGAAACACAGAGCAGGGTTGGTATTTACTTTGATGACCCTCATCGCGATCATTAGTG	13686:5:+
smaw_01_18227110	C01	18227110	295	-	G	T	TCCTCTCGTCTCCTCTGTCCTGTCTGACCTTGTCAGCGTTTTTGAATAATTAACTTCCCATAATTCAGTTAGCAGTGGTGTGCGTNNNNNNNNNNNNNNNNNNNNNNNNNNNNNNNNNNNNNNNNNNNNNNNNNNNNNNNNNNNNNNNNNNNNNNNNNNNNNNNNNNNNNNNNNNNNNNNNNNNNNNNNNACTGCAACTGAAACAAATGTGTATCTTATTTTTTCTCAAATCTGTCTTAAAAACAATATTCAGGTGCATTTTCATACATTGAAACAGTTTTTGTTTTTCGTAACCATTC	13689:295:-
smaw_01_18278849	C01	18278849	9	+	C	A	GCGCTGCCCATTCAGCTCAAATAATGAGGGTGACTATGAATAATGGATGGTCATTGTCATTCCCTTCCTTCAAGTAAGGCTGAATNNNNNNNNNGTAGAGGAGACAGTGTCCAACCTGTAGCCAGATGACATTAGCAGAGCCCCACTGGGTGACCACACTCTCCCCCAGGGAGCCGTATNNNNNNNNNNNNNNNNNNNNNNNNNNNNNNNNNNNNNNNNCCGCCACCGCCGCCTCCGCCTGCACCGTAGCACCAGCGTGGATTACGGCGATGTTGAAGTTCATCATGGCCCCTGCGTCACGCTC	13710:9:+
smaw_01_18282623	C01	18282623	3	+	G	A	GAGAGCCTGCGGTAATACTGAAAGAATGAGTCGCAAGGGAGGAGGAAATCGCTTGTGTAGAAGTCAGTCGCTGGCATCCATGCCTNNNNNNNNNNNNNNNNNNNNNNNNNNNNNNNNNNNNNNNNNNNNNNNNNNNNNNNNNNNNNNNNNNNNNNNNNNNNNNNNNNNNNNNNNNNNNNNNNNNNNNNNNNNNAGTGTGGAGTTGTGGAAGTGCAGTCTTTAGCCTTGTGTTCAGCACCACATTGGGCTGCTGCTGCTGCTGTATTGCATGCTGTCATCCAGAGTAATGAACCGGCTTCCTGTTGT	13714:3:+
smaw_01_18340353	C01	18340353	248	-	G	T	AGAGATCACAGGGATCTTGTGAAGTCTTCTGGAGCCGTGCCTCTGAACCCCCAACCTGTTCCTGCTACAACATACCACACCCCGANNNNNNNNNNNNNNNNNNNNNNNNNNNNNNNNNNNNNNNNNNNNNNNNNNNNNNNNNNNNNNNNNNNNNNNNNNNNNNNNNNNNNNNNNNNNNNNNNNNNNNNNNNNNNNNNNNNNNNNNNNNNNNNNNNNNNNGAGAAACACTGTCATCTGCCTTTTTTCACCCCCGCCATTTCCCATCCCTCAGGTGTCAGAGTTGCGGCAGCAGCTGCGTAAGCGTG	13754:248:-
smaw_01_18344004	C01	18344004	23	-	G	T	CCAGAGTGTAGAAATATGAAAACCAACCCCAGGTACATTGTTGAGAGGCACAGGACCTTGCTTCAATTCCCACTTGGCCTTTCTGNNNNNNNNNNNNNNNNNNNNNNNNNNNNCACGTTCTGATACCTGACAACACAAAAGAGGGTCTGAGATGCTCCACGCTGGACCACGGAGGGAGGAGTTCAAGGCTCACAGAGCT	13756:23:-
smaw_01_18346961	C01	18346961	229	-	T	C	GTTCAGTCTGCCTGGAGGTCTGAGAGGCTTTGCATCTCTATTTCCCCCTCAATCCATCTCCACTGTGCTTTGTGTGCCTCTATCANNNNNNNNNNNNNNNNNNNNNNNNNNNNNNNNNNNNNNNNNNNNNNNNNNNNNNNNNNNNNNNNNNNNNNNNNNNNNNNNNNNNNNNNNNNNNNNNNNNNNNNNNNNNNNNNNNNNNNNNNNNNNNNNNNNNNNNNNCCAGGAATTTCCTTTTTCTCTCTGCTTCGCTCCCTCGCTCCCCACGCACCCTCCCCTCCACCATGACACTGCTGGCCTCCGAGAGGTCGCTTCTCATCCGGAACAAGTTCCGCTCAGGTGAGGATCCTGGAG	13757:229:-
smaw_01_18347235	C01	18347235	38	+	C	T	GAGCTGCACTGGCAACAGCAGGCCTCCCTATAGACAGCCTGTCATAATCACACAGAGAGTCACAGAGGCCCACCCACAGAGACGGNNNNNNNNNNNNNNNNNNNNNNNNNNNNNNNNNNNNNNNNNNNNNNNNNNNNNNNNNGCCCGAGTAGAGGAAGAGGAGAAAGAAGAGGTAGAGGAAAGTCAAGCTCGCATGAGTGACAGAGACAGACGCCTCGGCAGATACTNNNNNNNNNNNNNNNNNNNNNNNNNNNNNNNNNNNNNNNNNNNNNNNNNNNNNNNNNNNNNNNNNNNNNNNNNNNNNNNNNGGGCACTCAAGAGATAGTGAGAGAGAGCTGGGAATCTACATAAGCTGCATTAGTGCACACACACACGCAACCTAATAACAATATT	13758:38:+
smaw_01_18355778	C01	18355778	183	+	T	G	TGGCTGGAGCGTTTGAAGGCTTTGCCGCACTGCTGGCAAACGTGAGGCTTCTTCTGCGAGTGAGTGATGGCGTGGCGCTCAAGGTNNNNNNNNNNNNNGAAGACCCGCGGGCACAGCTGGCAGTACAGCACCCTGCGGGCGCCCATGTTGCTAGGCGATGAAGCTGGAGAGAGAGGATCCAGT	13763:183:+
smaw_01_18359548	C01	18359548	218	-	C	T	ACCCCTGACCTATAGTGAAGTCCTCCACTGCATCCTTGACAATTATGATCTGTTAGATGCTAAATATTCTTTCAACAGCTCTTGCNNNNNNNNNNNNNNNNNNNNNNNNNNNNNNNNNNNNNNNNNNNNNNNNNNNNNNNNNNNNNNNNNNNNNNNNNNNNNNNNNTCCTCCAGCTTGAGCCAGTGCGTACTGCGGATGCAATCCACAGGCCTATGTGATGATGTATATATATAATGCATTAATACATGCT	13766:218:-
smaw_01_18400294	C01	18400294	269	-	G	C	CAAACAGGCACACGAACACACACACACTCAGCTATTCCACAATGCACAAACACTCATAATGCAATTAATACAAATGACTGTGCTGNNNNNNNNNNNNNNNNNNNNNNNNNNNNNNNNNNNNNNNNNNNNNNNNNNNNNNNNNNNNNNNNNNNNNNNNNNNNNNNNNNNNNNNNNNNNNNNNNNNNNNNGCCAACACATTCCAGGTGTGATTGTCGACGTGCAAACCTGAAGACAATTCTGGAAAAACAAGCAGAACGTTAAGAGTCGACAAGGAGA	13796:269:-
smaw_01_18423572	C01	18423572	67	-	G	A	TGAAAGTCCAGCTGTGCTTTTAACGCCTAAACATGACACTCTGGCCAGTGTGCTGCATCGTACAGCCGACAACCAAACCACTCTTNNNNNNNNNNNNNNNNNNNNNNNNNNNNNNNNNNNNNNNNNNNNNNNNNNNNTCTCAGTTTTCCCTGTGAAGTTTAGTTGTACTCTCTAAAGCGGAGGCTGTATTGGCCTGGGATGGGGGTGTGCGAAGAGGGTAAANNNNNNNNNNNNNNNNNNTCATGTGGAGCTGGTGGGAGATGTCCCAAGGCTTGTGGGTCCAGACAGAGCTGCTCTGTCCCTGGTCAGTGACAGAGAAACAATGG	13810:67:-
smaw_01_18427221	C01	18427221	244	-	C	A	TTTCCCCTGGAAAAAATTTCATGTGACACCCTTTTCCTCCAGATGGTGGTCACACGTATAAAAGCAGTGTGTGTATGTGTGTGTGNNNNNNNNNNNNNNNNNNNNNNNNNNNNNNNNNNNNNNNNNNNNNNNNNNNNNNNNNNNNNNNNNNNNNNNNNNNNNNNNNNNNNNNNNNNNNNNNNNNNNNNNNNNNNNNNNNNNNTCCTTTCCCCCCTGCTCTCTAATCTGGGTCACATACTTTGTGGGAGATTGGGCCATACCATTCCTCCCGCGTTTGAGGGGATTTGA	13817:244:-
smaw_01_18450762	C01	18450762	163	-	C	T	AGAGTTCTTCTGTGTCAGTCTGTGGAGGGCAGAGTTCCGCGCTGTGGCTCCTCGAGGTCCTTGACACAGAGTGCGCTGCTGCGTCNNNNNNNNNNNNNNNNNNNNNNNNNNNNNNNNNNNNNNNNNNNNNNNNNNNNNNNNNCTTTTGAGCTCCCCCCCCAAGAAAAGAAATGCCTCATTTATCCTCTCACGCCATTCTGCTCTCTCACTTTGGATTGTTCCCACTTAAGCCTGAGTGGCCGGAGCCTTTTCCTATCGGAGCTTTTGCTGGTTTTTCCCGCACTGCTATACCCCTTCCTCCCTT	13824:163:-
smaw_01_18452300	C01	18452300	12	-	C	T	GAGAGGGCACAGCAAGCACCACAACCACAACGTTAGTTTCGGTGTGCAAAGCACGTGACAAATTACCAAGAGCCACATCAGTCGCNNNNNNNNNNNNNNNNNNNNNNNNNNNNNNNNNNNNNNNNNNNNNNNNNNNNNNNNNNNNNNNNNNNNNNNNNNNNNNNNNNNNNNNNNNNNNNNNNNNNNNNNNNNNNNNNNNNNNNNNNNNNNNNNNNNNNNNNGCTGATGTTGATACAAACTGAAGGACTTTAAGAATCACGACTCAGGGAGTGCACATCAAAACCCTCACTTCACCTTTTATGTCTG	13825:12:-
smaw_01_18458954	C01	18458954	64	-	T	A	CACAAGGAGAATGGGCTCCGCACATCATCCATGTTACCGTCAGTTTTTGGCCACTGTGTAATGAGAGACCGCCTGATGAGGGCGTNNNNNNNNNNNNNNNNNNNNNNNNNNNNNNNNNNNNNNNNNNNNNNNNNNNNNNNNNNNNNNNNNNNNNNNNNNNNNNNNNNNNNNNNNNNNNNCTAAGCGAGCTAGCTGCATGCGAGAGGTCTCTTTACTACAGCTGGTGAGGTAACAGCCGCTACCGACGGAGGAGTCGAGCCTTCGTTGTCTCCGTCATCGCACAAATT	13831:64:-
smaw_01_18529546	C01	18529546	277	-	A	G	CAAGCTAGCAGCTCTGCGACATTGTGCTCGAGCACAGCAAAGTTCGGAGCTAAATGCTAAAATGCTCACACTGACAATGCTAACANNNNNNNNNNNNNNNNNNNNNNNNNNNNNNNNNNNNNNNNNNNNNNNNNNNNNNNNNNNNNNNNNNNNNNNNNNNNNNNNNNNNNNNNNNNNNNNNNNNNNNNNNNNTTAGTTTTGCAGGTATTTGATCAAACTGAAATTCTGACATGATGATGAGACCGTGGATGTCATGGCCATCCTTCCAGTAGTTGTTG	13874:277:-
smaw_01_18557547	C01	18557547	113	-	A	C	AATGTGTTCTACAGCAACACTCCCACTGCCGAGGAGACCCGTCAGTGAAATGAGACTGGGCGGCTTCCAGGGTAAGACATGCCACNNNNNGCTCGTCTCGTTCGTGTTCGTGTGTCTTCATCGCCAACCCTCGTTCCTCATCTCTCTGCTCGATCCAGGTTCTAGTCTCCCCAGGANNNNNNNNNNNTCCGGACCCATACGTGTGGAGGCCAAGTTTCCTCACGCTCCTGGAGCCTCGGAGGGCGGTGGGGGAGGGGGCGGGGCTTGCTTAC	13882:113:-
smaw_01_18557724	C01	18557724	57	+	C	G	CTTCAGCAGCCAGGGATTATGTGATGGTGATGAAGTGTTGCTCCCTGCTGGACCCACCTGTTGGTGCAACAGCTGCACAGGAGTCNNNNNNNNNNNNNNNNNNNNNNNNNNNNNNNNNNNNNNNNNNNNNNNNNNNNNNNNNNNNNNNNNNNNGGTCATGCCGTGCAAGAGGCCGCTGGCTGGGGAGACCTGGCTGAGAGACATCACCGTAGAGGGGATGAGGCTCGGGGAGAGGTTGGACGTGTTGGTGGCGAGGAGGAGGCAGCCCTGCGGGCCCGAACCACTTGACATGGTGG	13884:57:+
smaw_01_18571600	C01	18571600	44	+	C	T	GGAAGATCAGCGCTCTGGAGCAGCAGCTGCACCGTCGCACCGCCGCCCTCAGCAGCCCCGAGCACCACGATGACGACAGCGGTCANNNNNNNNNNNNNNACCATCACGACGACGAGCACCACGTTGACGAGCACCCAAACGACCACACGGACGACCACAACGACGGACATCACGACGGCCACGACGACAGCGGGAACCACACCGACCACCACGACGACGACAGCCACAACGACGACCATCACGATGCAGACAGTGATCACGATGACCACGACGANNNNNNNNNNNNNNNNNNNGATGATGATGATGATGATGATGATGCTGCTGACCACCACAGTAACGAAGCAGACAGTCACAGTTACTTTCCACACACAGGATACA	13895:44:+
smaw_01_18615590	C01	18615590	62	+	G	A	TTCCTCTTCTGGGCATTGGAGCGAGAGTTCTCCTCCTCCACCTCCTCCAGCTGCCTCTTCAGCTGCTTCAGTCGGACCATCGACTNNNNNNNNNNNNNNNNNNNNNNNNNNNNNNNNNNNNNNNNNNNNNNGAGCGTATTGCAGAGGTCAGGGGGAGAAGTGAGATGGGAGGAAAAAGGGGCACGAGAAGACAGAGAAGGGGACGAGTGTATAAAG	13912:62:+
smaw_01_18676313	C01	18676313	307	-	T	C	TCAACCATGTGAAAAAGGTAAAAAAACATATCAATAGTTAATCCCCGAGCTAACTGATGAGCTGAACTCTGTGAGATATGATTGANNNNNNNNNNNNNNNNNNNNNNNNNNNNNNNNNNNNNNNNNNNNNNNNNNNNNNNNNNNNNNNNNNNNNNNNNNNNNNNNNNNNNNNNNNNNNNNNNNNNNNNNNNNNNNNNNNNNNNNNNNNNNNNNNNNNNNNNNNNNNNNNNNNNNNNNNNNNNNNNNNNNNNNNNNNATGTGTCACTCCAAATAAACTGGAGACACCGTGACTAAAACTGGGGCAAGAGACTACACTAATGCTTAGATGTACGTATAGACAA	13953:307:-
smaw_01_18682178	C01	18682178	54	+	C	T	TCCCAGAGCAGTCTCTGCACGGACTAGGTCATCGAAATCCATCAGAACATCATCGCACACATGCCGAGGGATGATGGGAGTGGAGNNNNNNNNNNNNNNNNNNNNNNNNNNNNNNNNNNNNNNNNNNNNNNNNNNNNNNNNNNNNNNNNNNNNNNNNNNNNNNNNNNNNNNNNNNNNNNNNNNNNNNNNNNNNNNNNNNNNNNNNNNAGAGGTGGACTGTAAACACACACCTGCGTGTCTCTCTATTAGCTCCCTCAGAGGAATAGACATCTCTTCCTCCACTGTGCATGGA	13957:54:+
smaw_01_18712516	C01	18712516	16	+	G	A	AAGGGAAAGCTTAATGGAAAATAGCAAGTCACTGCAAAGATAAGTTGCTGAGGAAAAAAGTATGCTGCAATCAGAAAAATCCACANNNNNNNNNNNNNNNNNNNNNNNNNNNNNNCGACAGTTTCGAAGGCACGTCGCATCATCGGATGTTCCTCCAGCACCTCGTTAAAGCTGTCCACACTGAGAGAATACAGACGACA	13975:16:+
smaw_01_18721907	C01	18721907	202	-	C	G	TGAGCGCCTCACGCGCCTTCCGTCGCGATCAGTGGGGTTTTCCGCTCGGACTCCGTGAAAACATGGGCTAGATTTGATGGTAATTNNACTTGTTCTCCGCCGCCTCGTGTTTCCTTTTTATTTTTCAACGCGTGCGTGTTTCTGGTGGACGATAGGTGTGCGTGTCAGGATGAATCAGTGCGCCTCGGAGGATGAGCGTGTGTGTGTGTGTGTGTGTGTGGCTGATGCGCGTCCCTCGTGTGCGTTAACAAGCCGTGTCTCCTGACGGACCATCAAGTGTCCTTGTCATTCATCCGCCGGTGAATGTTGGCCACTCCACCACCGTATCGCTCGGATCACCTCTTCCACTATGATACAGGGGAAATAGCAACAC	13981:202:-
smaw_01_18727478	C01	18727478	30	+	G	A	AATATGCATGCGTGTGTGCCTGTGTGTGCGTGTGTGTGCGCGCATTAAGCGAGAGAAGGGTACGAAAGAGAGGAAATGTGTGTGTNNNNNNNNNNNNNNNNNNNNNNNNNNNNNNNNNNNNNNNNNNNNNNNNNNNNNNNNNNNNNNNNNNNNNNNNNNNNNNNNNNNNNNNNNNNNNNNNTCGCACCCATTAGACATTTCATTTTCTAACAGCGGAGTCTAAATCTGCATATTTTATGCCGTCTGCATCCCCTTTTCTGTGTGGATGTGTTTGTGTGCGGCTCTGACCTGTGTGGCACAGATGACGGGCTTGCCGGCGGAGTTGCAGCGCCCAATCATCATCTTCTGAGCAATGA	13988:30:+
smaw_01_18756088	C01	18756088	12	+	C	G	CGGGATCTCTTCCCTCACTGACCACATACTGATTAAAAAGCATCCTCGGGTGCTGATGCTGTAACATTAACACAACTCCAACGTGNNNNNNNNNNNNNNNNNNNNNNNNNNNNNNNNNNNNNTTTACCCAGGAGCCTCTGGAAAATGGCGCTGACAGTCTTGCGATGGACCTCTGGCGACAGAAGAGAGTGAAAAAGCACAGGTGCCG	14010:12:+
smaw_01_18789404	C01	18789404	40	+	G	C	GGACATGTCCGTGTGGAATAACATAAACAAACAACTTCGGCAGCGAAGAAGAAAAAAACAAAACTCAACCCCCCGCCCCTCCTCCNNNNNNNNNNNNNNNNNNNNNNNNNNNNNNNNNNNNNNNNNNNNNNNNNNGCTTTACTCGGTGTTGTAAAAACGCCAGAAAAAAACAACACCCCGCGGCTGGTTCCCCCCCAGGGCGGGTCGGGGAGTCACAACACGGGCGGAAATCACGCGTTCGCTCCTCC	14030:40:+
smaw_01_18828694	C01	18828694	66	+	C	T	GGAAACCAGGTCAGAGAGAAAAAAAGGAAAAAAAGAACGAGGGAGCGACAGAGAGGTACAACGTACGAGACAGTCACTGATCTCGNNNNNNNNNNNNNNNNNNNNNNNNNNNNNNNNNNNNNNNNNNNCGCAGCACACGATCCCTCACCAGAGACCGAGGGAGACTGGGATGAGACAAAGGGGAATGGCCACATTAATTACACACTCTCAGGGCGGGAGCTATCACCGGAGGCTAACAGAGGGACCGGCACAGAGATGGAGGGACAGTGAAAGATAGAGAAATGGAGATGATCACGCTCACTGAGTA	14045:66:+
smaw_01_18839781	C01	18839781	71	+	G	C	GACAGACATATGGAGAGATTTTTGTCCAATGTCCTTGTACTTGGATTTACCAACCACAGGAGGGAGACATGACATCGTTCAAAAANNNNNNNNNNNNNNNNNNNNNNNNNNNNNNNNNNNNNNNNNNNNNNNNNNNNNNNNNNNNNNNNNNNNNNNNNNNNNNNNNNNNNNNNNNNNNNNNNNNNNNNNNNNNNNNNNNNNNNNNNNNNNNNNNNATGGCGGTTGAGTGTCAAGTGGCAGGTCAGTGCGAGGGGGGATCCGAGCGTTTCTATTGGGTGCAGATCCTCTTGAGCGCAACCT	14056:71:+
smaw_01_18840760	C01	18840760	299	+	C	A	CAACCACACCCATCCGAATCCATAAACGCGTCAATCACTCTCCAAGGATACGAGTTGTTGTGTTCTACTTGACTAATTTGGAAAGNNNNNNNNNNNNNNNNNNNNNNNNNNNNNNNNNNNNNNNNNNNNNNNNNNNNNNNNNNNNNNNNNNNNNNNNNNGTACGGAACATGGAGAGAACACAGCCATCAAAACCTTTGCCAAACAGAGGAGAAGGTTTTTAACGGACGTACTGCGAAGGGGTGCNNNNNNNNNNNNNNNNNNCCTGGGCCTCTCTCGCTCCATGGGCCTCTCTCTCTCCGTCAGCCTCTCCCTTCCTCCCTCCTTCTTCTCCACAGGGATGTAGAACT	14058:299:+
smaw_01_18856665	C01	18856665	242	-	C	T	GAATAGTTGGTCCACATTTTTAGATGTCTGAACATTGCTTAAATATAGGTTAAAAGTGTTGATGAATGTGATGAATGCAAGACTTNNNNNNNNNNNNNNNNNNNNNNNNNNNNNNNNNNNNNNNNNNNNNNNNNNNNNNNNNNNNNNNNNNNNNNNNNNNNNNNNNNNNNNNNNNNNNNNNNNNNNNNNNNNNNNNNNNNNNNNNNGTGTTTGTCATAACACAGCGCGACTGAGGCCCATCGCAAGTGTGATTGGCTGCGTGTATGTGCGTGTTTTTACTGTTGCGTAGAA	14071:242:-
smaw_01_18860981	C01	18860981	233	+	G	T	AGCATCACGCCAGGTCAACTCCATCTGCTGAGGGACGATTGTGTGATACAACTGAAAGCTCTGGAACAGCTGCTGAATGGGCCTANNNNNNNNNNNNNNNNNNNNNNNNNNNNNNNNNNNNNNNNNNNNNNNNNNNNNNNNNNNNNNNNNNNNNNNNNNNNNNNNNNNNNNNNAGATATATCTGTGACAGGCTCATCCAGTCTCACCTCCTCGCTGGCAAACCCTCCCGATTGGGGGAGATGGACCTTCTGCTTCCGCCTCCTCCACCTCTCGCTGCACCTGGATTGGTCGGTCTCCTGATGATCCGTGCCGGCTGGGTGTAGCCATGTGAAGGAGTGTGATAGGGTGATCGGTAAGCGGACGCAC	14077:233:+
smaw_01_18884667	C01	18884667	147	-	A	G	TTGTTGATGAGGAGATGAATGGCTCCCCTGTCACAGTATACAGGCATGTATCAATACACACACACACACACACACACACACACACNNNNNNNNNNNNNNNNNNNNNNACCAGTGTTTTCTAAACTCTCATGGAAAGTTTAAACCTTTTTCGTCCCTCAGGTGTGGAGACAGCGTAGGGGTCTGCGCGGGCCCCCTCCTCCCA	14090:147:-
smaw_01_18893376	C01	18893376	20	+	G	A	GGAATTTGGCGTGGAGGGAGAGGTTGTGGAGGATGTGGGAGAGGGAGAGGGGGATGGAAGAGGTAGATTCAGAGGTTCCTTCACTNNNNNNNNNNNNNNNNNNNNNNNNNNNNNNNNNNNNNNNNNNNNNNNNNNNNNNNNNNNNNNNNNNNNNNNNNNNNNNNTAACTGTGCCAGGACGGGGCAGCTTCGGGGGTTCACCTAGCAACGATGTCATGAGGGGTGGAGGAGCCACTTTGTTGCCTCTGGTCCCCACTCCGCCTCGCTCAGCACCTTCAGGTCTGATTGGGGGAGGA	14097:20:+
smaw_01_18922777	C01	18922777	188	-	T	C	GAAACACCACACTTCAGAGGACATTCAATCTAGATCTATATACAGGATCATAAACATCCAGATGTTTTCAGCCCCCTCTGTTCCTNNNNNNNNNNNNNNNNNNNNNNNNNNNNNNNNNNNNNNNNNNNNCCTGAACACTCTGATCAAGGTGGAGATGATGCTAAAGCTTTGGTTTCCTCAGATCCCCACCCTGCCCGTCTCCGCAGCCCCCAGCATCGCNNNNNNNNNNNNNNNNNNNNNNNNNNNNNNNNNNNNNNNNNNNNNNNNNNNNNNNNNNNNNNNNNNNNNNNNNNNNNNNNNNNNNNNNNNNNNNNNNNNNNNNNNNNNNNNNNNNNNNNNNNNNNNNNNNNNNNNNAACTTCTATATTCACTTTCAAATGACTCTCCTTTCTCCTGCTCA…	14104:188:-
smaw_01_19010528	C01	19010528	76	+	C	T	CATTAAGCTGGAGAATGTGCAGCAGAGTGCTGCAACACGTAAACCTGCGCTTCCGTACCAAGGGAGGTGACTCACCCCTCTGGTANNNNNNACGGCTTTGTCAAACATCCCATCTGTTACGGCGGATCTGACTGAACACGCATAAAACTCATGCACAAGATAAGACGATCTCACCTGTATAATGTCACGCGCGTACTGCTCGGCCCGCTCCCAGCTCCCCAGCTTCACCCCTCTGTCCAGTGGGCTCCACCCGGCGCAGGCCTCTGTGCCAAACAGGTAATACTCTGGATACAGATGATGGGTGGTTCCCA	14140:76:+
smaw_01_19047510	C01	19047510	281	-	C	A	GACTCAGAGAAGAAGAGTAACACACACACTAAGTCAGACCCTCCTGTTAGTGGCATCACTGAGGCCCCTGGTTGCACCACTCCCTNNNNNNNNNNNNNNNNNNNNNNNNNNNNNNNNNNNNNNNNNNNNNNNNNNNNNNNNNNNNNNNNNNNNNNNNNNNNNNNNNNNNNNNNNNNNNNNNNNNNNNNNNNNNNNNNNNNNNNNNNNNNNNNNNNNNCTCTCCCCACCTATTACCTGTACCACCCTAAGAACTGCCCCCTGCACAGGGGTGCCCCTCCTCGCCTCTCCCCTATTGGAGCCCTGTCCCC	14174:281:-
smaw_01_19135120	C01	19135120	67	-	C	A	CTCCCCCCTCCCTGTATTCTCCTGTTCTGTATTTGATTAGTCCATGTCAGGCAGTCAGATCAGAGTGCTGTTTGCAGTGCAGAGANNNNNNNNNNNNNNNNNNNNNNNNNNNNNNNNNNNNNNTATCCACACAGCTTTGAGGCCCTTAATGCAATCTGAGCCACTGGGATACACTGGAGCCAGTGCAGGGCAATGGTTTAAGTGAGTCT	14213:67:-
smaw_01_19135197	C01	19135197	3	+	G	A	GCGCTGTGGGTAATGCGTCCGCTCTCCTCTTTAAGTGGTGAGAACGCAGCGCAGAACATCTCGCCTCCAAACAACTGTGCCTTGTNNNNNNNNNNNNNNNNNNNNNNNNNNNNNNNNNNNNNNNNNNNNNNTCGGAAATTGTTTCAATCACCAAAGACACTCGCCGCTTCACGTCGGGTTTTCATATAAAACGAGTTATAAAAAATAATAGAGCATCATCTCCCCTGACC	14215:3:+
smaw_01_19168018	C01	19168018	79	+	G	T	CCCAATGCAGTGACCAGCACATTCTCCCGAGGCTCCTCTGTCTCTCCAGTCCACCCTCGCCGCTTTAAACTGGTGCCCGTGCCGTNNNNNNNNNNNNNNNNNNNNNNNNNNNNNNNNNNNNNNNNNNNNNNNNNNNNNNNNNNNNNNNNNAAATGAGATAATCAAGTGTATGATGAAAAAAACGAACAAAAAACAATGAATAGGCTCATTACTGGTCTTTTACCTATCGAGACGG	14238:79:+
smaw_01_19171970	C01	19171970	225	-	T	G	AAAGATGGTATGTGTGGCAAGGTAAGGCTTTGCCTGCCTCTGTCCAGTCGATGATCCAGCCTGGCTCGGTCGCTCTGACTTTTTGNNNNNNNNNNNNNNNNNNNNNNNNNNNNNNNNNNNNNNNNCAGAATATTTTCCAGCTGCTGAGGCACAGAAGGGATGGAGGCACCTAGGAAGGGAGATTGTTACGTCTTAACTCCACACTGTCGCCATTTTTGGCCCTCAT	14244:225:-
smaw_01_19175821	C01	19175821	72	+	T	A	TAAAACACAAAATACTTTTAGTATGTGGATTAACAGAGCTTGAACATAAACTGTGGACAATATTTCCCCTTTTTGCCTCATCTAANNNNNNNNNNNNNNNNNNNNNNNNNNNNNNNNNNNNNNNNNNNNNNNNNNNNNNNNNNNNNNNNNNNNNNNNNNNNNNNNNNNNNNNNNNNNNNNNNNNNNNNNNTGCTGCTCTGACAGGGAAAAGGGCCATTTTCCAGGCAGCTTGGGGAATGTAAAGTTGGCAAACTCCCGCTTGAGGTTTTGGTGTAGG	14247:72:+
smaw_01_19176413	C01	19176413	143	+	G	T	ATCTGATTATAAAGCTTGTTATGTAATCATGATTTGTCATTTAATCCACTCCTTTGTTCACACCAAACGCACCCCTCCCCTCTCANNNNNNNNNNNNNNNNNNNNNNNNNNNNNNNNNNNNNNNNNNNNNNTTCCTGGTTTAGCTCCGTGTGTTTGTAGCTGGGCACAGAGATGGGGACAGCCTGCTTGTCGGAGTAATCGTAGCAGGACTGAGCTGAACTGTCGTCTCCGGGATCCAAGCAGTCGGCCTCCTGGGGCGGGACGGGCAGCACGGCCAGCACAAGCTC	14249:143:+
smaw_01_19188025	C01	19188025	180	-	G	A	AAATGTGAGTCATTGATGCCGCCATCATTTTTTTCAGGGGAGAGATATTTGGACATTCTCGCCCTCGCCACTCACTAAATAAAAGNNNNNNNNNNNNNNNNNNNNNNNNNNNNNNNNNNNNNNNNNNNNNNNNNNNNNNNNNNNNNNNNNNNNNNNAAATACATATGGATGACATGTCACCTCCTTTAACATGTTTTATTTAAAACAATTACGACAAATTAAGTTAATAAGTGGTGGGCAAG	14256:180:-
smaw_01_19215713	C01	19215713	286	-	C	T	TTTTCAATGGCCTTCACAAGCCTGGAGGGGAAGAGGCACAGTGACAAAATGAAGAAGAGGAAAATGAATAAAGACAGATTAGGAGNNNNNNNNNNNNNNNNNNNNNNNNNNNNNNNNNNNNNNNNNNNNNNNNNNNNNNNNNNNNNNNNNNNNNNNNNNNNNNNNNNNNNNNNNNNNNNNNNNNNNNNNNNNNNNNNNNNNTCCAGCAGCCCTTGCCTCTCTGACACCTGAGCAGACAGGGCCTCCTCCCTCCTGCTGCGAGATCCCTCCAGGGCCAGAGCCAAAGCTCCCTGGCGCTCCGCTACAGC	14266:286:-
smaw_01_19246269	C01	19246269	137	-	A	G	AAGAGCGGAGGTGTGTTTGTGGCTTCTAAATATGTGTGTTTTGGTCTTGCTACACATTTGGTTATGTGTTGGATAAACGCATCATNNNNNNNNNNNNNNNNNNNNCAGCGGAAGTCTGCTGGCCGTGAGGGACACTTTGACAGCCAGCCTGAGTAATGTGTATGAGTGAGAGCCGCAGGATCCTGTTGTT	14277:137:-
smaw_01_19271862	C01	19271862	64	-	A	G	ATGTTGAAGCAGGTGAGTTCGTGGAGATGGTTCGTTTTTTTTTTTACTCCCCAAAGGCGAGAATGTGTCTGTGGAGGGCCAAGGANNNNNNNNNNNNNNNNNNNNNNNNNNNNNNNNNNNNNNNNNNNNNNNNNNNNNNNNNNNNNNNNNNNNNNNNNNNNNNNNNNNNNNNNNNNNNNNNNNNNNNNNNNNNNNATGAAGGCAGCTTTTCTGTCTGCATTCGTTTATCACAATGAGTCAGGCTGAAGGGAACATTCGTGCCTTCTCTGATTGTGTTTGCT	14286:64:-
smaw_01_19299605	C01	19299605	191	-	C	T	AAGAGCTAGAGAACAAAGATTGAATTCCCTCAACTCTCACCATCTACTGTGAAGGTGAAAACATTTCGTCCAACTTTGGTTCTTGNNNNNNNNNNNNNNNNNNNNNNNNNNNNNNNNNNNCAGGAATGTTTAGGCCGCAGTTTGAGGCAACAAGGAGAGCGGTGCCTATTAGCAGATTGATGTTGGCTGCGCCTCTACTGACAAG	14298:191:-
smaw_01_19307784	C01	19307784	79	+	G	A	AGAAAGGTTCAGGGTGACAGCGACATTAAGGCCCCCTTTTCTCCACGAGCTAATGCATGCCACCAACCAAAAGCGATGGCATTGCNNNNNNNNNNNNNNNNNNNNNNATTCACCGTTTCACGCGGAAATAACATCATGTCTGAGCCTGAGCAACCTCCGTCTTCTCTCAAGCTGTTTTCAGGAAAATTTGGTATGGAATTTGTTGCGGAGTTTGCCGTTCACATATGAAGAACGCATGTCAAAGTCAGAAGCATTCACGACAGCAGGAACATTTCCGGAACATTCAGGC	14304:79:+
smaw_01_19318791	C01	19318791	276	-	G	T	GGACACAGAATTATGCTTATTCCATCTACACAGAGAGAGAGCAGGCGGCAGAGAGGGAGAGAGTCTTTAATTGAGGTTTTATCCANNNNNNNNNNNNNNNNNNNNNNNNNNNNNNNNNNNNNNNNNNNNNNNNNNNNNNNNNNNNNNNNNNNNNNNNNNNNNNNNNNNNNNNNNNNNNNNNNNNNNNNNNNNNNNNNNNNNNNNNNNNNNNNNNNNNGTTCGCGAAGCGGCGGCGTAATTATGCGGAAATTGGGAAATGGCTAAGTGAATTATGACCTTGTTTCAGCAGAGGGCTTTAATCA	14312:276:-
smaw_01_19429924	C01	19429924	12	+	A	C	TGGAGAGAAAGAGGAGGGGATCCGAGGGGAGCGGAGGAAGGAGAGCGGGCGAGGACGTGGCTGAAGTGGGGAAAAAAAGTAGCAGNNNNNNNNNNNNNNNNNNNNNNNNNNNNNNAGGGAACACTTGTTATTGGACCACAAATGCTTACAAGAATACATTTATCATCCTGTCATTCTTTTTTTGTTTTTGTTTTACCACTTC	14430:12:+
smaw_01_19530666	C01	19530666	130	-	T	A	GGGCGGGGCCAGGCAGGTGCACGGGCATGTGCTGCTGGGCAAGCCTCGTGCCCACACTCACTTCTCTTATGCGTTGGTCTGATCTNNNNNAAAAAGTAATGCAGGGGACTTATTACCACCGCTTCATTCAATGCATGGTTGCAAGATAACTCATTTATTGATTTAAGATTGATAG	14480:130:-
smaw_01_19664261	C01	19664261	12	-	G	A	AGACCAAGCATCTACCCATCACTGAACAGGTAAAAACAACTACATATTACTTGTATGTATTTGTATGTGTACAAATTATCTCACTNNNNNNNNNNNNNNNNNNNNNNNNNNNNNNNNNNNNNNNNNNNNNNNNNNNNNNNNNNNNNNNNNTGAGGGAAGGTCAAGGAATCCAGTGGCTGTGCTTTTTGACACACTGCTGCACCCCAATGCTGACTATGGCTATGAGTTCCCTCCTGTCCTTCAGTGGAGGAGAGACAAGCAGCAACACATCCCACATCTGGTGCTGGGCAGGGCAACACCCGGAGGTGCTTGGCATGTAAGCAACAAGGTGTAG	14557:12:-
smaw_01_19675298	C01	19675298	35	+	A	C	GAGAGGTTGCCCTTAAAAGCAACTCACATGCTTCACCGTGCCGCAGCATCACTTTCTCGTCACCCTGCACTGACACACAAAAAGGNNNNNNNNNNNNNNNNNNNNNNNNNNNNNNNNNNNNNNNNNNNNNNNNNNNNNNNNNNNNNNNNNNNNNGCTGTGTGCAGTCTTGAGAAGTCGGATCAGTGAGTGTGCTGATAGGATGAATGCTGGGAGCAGTGAGCGTGATGAGGTGACTGGGACGCCAGACC	14568:35:+
smaw_01_19819568	C01	19819568	188	+	A	G	GTATACAACTTTTATCCCAAAAACATCAGAGTGACATGGCTGAGGAACGGAGAGCCGAGAACATCTGATGTGACGTTCACTGACGNNNNNNNNNNNNNNNNNNNNNNNNNNNNNNNNNNNNNNNNNNNNNNNNNNNNNNNNNNNNNNNNNNNNNNNATCACCTGCATGGTGGAGCACGCCAGCTTCAAGGATCCTAAACATTATGACTGGGGTAAGAGAGAGACAGGAGATAATTAGATTTACTTGAATGTTACC	14641:188:+
smaw_01_19823753	C01	19823753	173	-	T	C	GGACAGTCCTGCCTGGAAATGCCCATGACGGCGTGACTCCCTCTGTGGTCAGGGTTCCACAGCACCTCCCAGACGTGGAGCCCACNNNNNNNCCCCACCTCTGCTCTCACGCCGTCGCTGCTAAGCTCAACGGGTGAACGTGTCGCTCGCTCTTTGCAGGCAGAGAGCAGAAAGTGAGGGGAGCGGTGGCCGGAGCTCCAGTGTGAGCGACTGT	14643:173:-
smaw_01_19843578	C01	19843578	72	+	G	T	ACTTCGCTTCGCGGGGAAATCCACACTTTCATCTCATTCCTCCTCGGATTAAGACGGGGGGGTTCATCCTTGTCTTCGCTGTGTGNNNNNNNNNNNNNNNNNNNNNNNNNNNNNNNNNNNNNNNNNNNNNNNNNNNNNNNNNNNNNNNNNNNNNNNNNNNNNNNNNNNNNNNNNNNNNNCTGCCTCTGTTTCCTCTGCGTGAGCGCCTGTGCAGCCCGCGTGTGTGTGTGTGTGTGTGTGTGGTGGAGGAGGGGTCGTGGGAATCNNNNNNNNNNNNNNNNNNNNNNNNNNNNNNNNNNNNNNNNNNNNTGGAGATCACCAAACATCAAGTGTTTTGTTTTTTTTAACGATTCATACCAGAGAGCAGACATAAACATGTTCTGATAAAACATAG	14658:72:+
smaw_01_19848168	C01	19848168	47	+	A	G	GAGATGGCATCTGGAGAGGCTGAGAAGGAGGAGGAGGAAGAGGGACAGAAGTGAGTGGGGATGAGGTGGTGATCCTCATGTTTCANNNNNNNNNNNNNNNNNNNNNNNNNNNNNNNNNNNNNNNNNNNNNNNNNNNNNNNNNNNNNNNNNNNNNNNNNNNNNNNNNNNNNNNNNNNNNCGTCCTGAAGAAGACATCAACATACAAGTTCAAAGTCACAAGTTGATGCACGGCAACATTAACTTCAGCAGCACAGTTTGGTGTTNNNNNNNNNNNNNNNNTACCTTTTGGGTCTGGTTCCATTGAGGCCCTGCTCACTGGCTCCACCTGGTGGCTCAGGCTGGTTGTTGCGCACGACACGCTCAG	14660:47:+
smaw_01_19857126	C01	19857126	64	-	A	C	CACATCGCGACTCGTATCTGCTGCATTTAGTTAGGATTCAAACAAATAATAAATAGTTCACCTGTGTGTTGACATAAAAACACACNNGTCAGACATAACACCAGCAGCCTGTCACGTCATCCTCCATTAGCCCACCGCACACGATTCCCCCCTGACAGTCCACACAGAGAGGNNNNNNNNNNNNNNNNNNNNNNNNNNNNNNTGTCTTACCTTCGAGTCGACCGCTTTGCCTTTGAATGCCATCTCATGGTTTTGCACTTGCTGTTTTACAGGCGGTTATAAAAAGAAG	14672:64:-
smaw_01_19869504	C01	19869504	9	+	C	A	CTGATTCTCCATCCAGCACATGTATTACTCACCACACAATGTCATCCTGAGGGAGGTGCTTTCATTGGCCTCAAAACATCTGACANNNNNNNNNNNNNNNNNNNNNNNNNNNNNNNNNNNNNNNNNNNNNNNNNNNNNNNNNTGTTTGTGTTTTCAGGTCCCCTCTCAGTGACGAGCTGAGGGCAGGGTGTTTGTCTTGAGAGGGAGGCAGAGTTACCGTGGTAACA	14682:9:+
smaw_01_19922332	C01	19922332	54	+	T	G	CGTGAGTCAAGAACTTTCACACACTCATTGATTTGCGTTCATGCTGTCAATTGTTTTTTTTAATTAAATATTGTGTGCTTATTGCNNNNNNNNNNNNAAAGGTGTGTGCTGGGGCCAGGCCCTGCGTCTGCTTTCGTTGATGGATACCTTGGTGTCACAGAGAGCGTGTAAGAGCGCAGCGT	14719:54:+
smaw_01_19936685	C01	19936685	238	-	G	C	CAAAAATGGCAGGAATGATGATAATCTTCTAACCCTGGTGAGTTACGTAAGGAATGATGGCAACACAAGTCCGCCTCATCTGCCGNNNNNNNNNNNNNNNNNNNNNNNNNNNNNNNNNNNNNNNNNNNNNNNNNNNNNNNNNNNNNNNNNNNNNNNNNNNNNNNNNNNNNNNNNTTAACCAGGGACTCCTCAGGGCCTCTCCCTTTCTGACACTGCCAACAAATGTGCGCGTTCGTGCTTGTTATAGAGGAATAGGCAG	14729:238:-
smaw_01_19967926	C01	19967926	36	+	T	G	TCACATTTACTGTACATGAGTGTGTGTTCTCGTCGTTGTGACACCAGTGAGTAGCTTTTGAACTGCTCAGGACTGCCCTTCCTGTNNNNNNNNNNNNNNNNNNNNNNNNNNNNNNNNNNNNNNNNNNNNNNNNNNNNCATCACGGTACATGCGGGCCAGCTCCTCGGGCAGCGACAGCATTTTTGACAGCCTCTCGTGGTCCACCGTGCCGAACTCGTTGTTTCCCACCGCGTGGCGCATCAGGTGGGTCGCCACGTTCTNNNNNNNNNNNNNCGAAGACACCCTGGCCTTCCTCTCATCGAGGAGCCCCTGCATCTGCCCCAGGGTGACCCTGTAGCCTCCCACTTTGAGCGGCTGA	14749:36:+
smaw_01_19971437	C01	19971437	239	+	C	G	CATGTGGCTGCACTGCGTCGGTCCTCTATGGGGGCGTTGGCTGGCAGCTGATTACTCTCAAAACCCATCACCGCAGACACATTCTNNNNNNNNNNNNNNNNNNNNNNNNNNNNNNNNNNNNNNNNNNNNNNNNNNNNNNNNNNNNNNNNNNNNNNNNNNNNNNNNNNNNNNNNNAAAATACCCCACAGACCTTAAAGCTGAACTCGTTGGCTTTGAGGATGGAGTTGACCTGTGGGGGCGTGAGGATGTAGCTGCGGAGGNNNNNNNNNNNNNGGTAACTTCTTGAGTGCAGCTGACTGTGCCACATGTGGGACCTGTGTTGTTGGCATGGTAACAGAGTGGAGGCCAAGACCTTGGC	14752:239:+
smaw_01_20002267	C01	20002267	172	+	T	A	AGGCTGGAGACGAGGAAGCCCTGCCTTGCTCCCCTCTCTCACCCCTCAGTCTCTATCCCACCTCGCTGGAACAGTTCACACACCANNNNNNNNNNNNNNNNNNNNNNNNNNNNNNNNNNNNNNNNNNNNNNNNNNNNNNNNNNNNNNNNNNNNNNNNNNNNNNNNNNNNNNTCATGGACACAACATTAAAAATTTATCTAGAAGCGACTATAAAGTGAACGGAGAGGAAGAAAAGACATTGTTTTGAAAATTAAAA	14772:172:+
smaw_01_20057889	C01	20057889	196	-	C	A	CAGAAGCGTCTCCACCTTCTCCACCCCTCAGCCTGCTCTCCGCTCTGCACAGGGCTTATTCTCACTCCACGCCCCGTGACTTCGANNNNNNNNNNNNNNNNNNNNNNNNNNNNNNNNNNNNNNNNNNNNNNNNNNNNNNNNNNNNNNGTTCTTTGTTTCAGCAATTTCTCTTCTCTCTCCGTGTCCCACAGTTCAGTGCTGCCGACCCTCCCTCCTCCTCCTCAGACGCCGAGCACATCCAGCTCTTCTACCGGCTGCTCACCATCTCGATGGAGACCACGCG	14813:196:-
smaw_01_20075185	C01	20075185	58	+	T	G	CTTGTCAGCATTGTCAGATTTATGACCGAGGAAGTTATGTCCTTGTGTGGAAAGTGCTTCGGAGGTGCCACCTCTCACAGTTGAGNNNNNNNNNNNNNNNNNNNNNNNNNNNNNNNNNNNNNNNNNNNNNNNNNNNNNNNNNNNNNNNNNNNNNNNNNNNNNNNATGCACTGAGCCACTCTGAACTCTGTCTTATCACAAAGCAGAAGTGAAAAGTGATTGTGTCAGTTTGAATGAGCTCTCTATGTCTA	14825:58:+
smaw_01_20082532	C01	20082532	11	-	A	T	TGGGTGAAACTGATTTTTGATTTCCAGTATTCCCGAACCTTTGGAATTCCATCTGAACATCTTACATCAGCACCAAATCATGTAANNNNNNNNNNNNNNNNNNNNNNNNNNNNNNNNNNNNNNNNNNNNNNNNNNNNNNNNNNNNNNNNNNNNNNNNNNNNNNNNNNNNNNNNNNNNNNNNNNNNNNNNNNNNNNGAAGTCTTGATGCTCCTCTATCACCCAAGGAAATATCTGGGAGTGCCTCTCAGCGCACACCAAGGGCTTCTGGGAAGATCACAAT	14827:11:-
smaw_01_20114983	C01	20114983	15	+	G	T	AGGTAGAGAAAGTCGGACTACTATAGTGCAGCATGAGCTTATTCAGCTCAAACGAATCAAGAAACGCTGCGGCAAACTGCAACTGNNNNNNNNNNNNNNNNNNNNGTAGAACGAGGGACGTACGTAACTCTTCAAGAGGATGTGTAAGGCGGGGCAGTGTGTCAACACAGCACTTGCTGCTCCTCTGGTTACGG	14838:15:+
smaw_01_20117407	C01	20117407	125	-	G	C	CAAAGGGAAAATAAAATAAGTCAAATGTTGAAAAATATGCTCAACCTGATTATGTATAAATAATGCCACTTAGCATGAGTGCGATNNNNNNNNNNNNNNNNNNNNNNNGATGGAGGCCGCGTTGCTCCCCGTGACCTTTTCACACACATCCCCTCCCATTAGCCCAGTGATGCCCCGTGTGACTGCCACAGGC	14840:125:-
smaw_01_20164060	C01	20164060	187	+	G	A	TTTACATTTTCACATTTCCAGTTTTCTGCCCGTCTGACCGACGGATGACAGCGACACAGAGAGTCTGGGACATGTCTTTGTTTGCNNNNNNNNNNNNNNNNNNNNNNNNNNNNNNNNNNNNNNNNNNNNNNNNNNNNNNACCTTCATTACAGCAGAGGAGATGCTTTCAGAAAACAAAAGCAGACAGATCAGAATGTAAATATTAAAGATCCGCATGCAAAACA	14858:187:+
smaw_01_20218936	C01	20218936	286	-	A	G	GCCGCAGGTTATCCCTGAGAGGAATAACAGGCTGGCCTTCTGCATGTTGCTCAGCATTAGCCCCGAACAAACAGATCAACTGATANNNNNNNNNNNNNNNNNNNNNNNNNNNNGTTGAGATTTGAAAGCGCCTACACATGCATGCTTGCACGTCCAACACAAACACACTCTATTCTGTCGGCTCGCGTGCTTGTTTAGCAGAAAACCCTGGCGCTGTNNNNNAATCACTACGTTGAGGTTTTGATGTCACAGCAGGAATGGAAATGCTGGTCTGACTCTCATAGATATACTATACTGCCTTCATCAGCTTCACCAAAGTCCGGAGCTGGGAGAAGTTACACTCAG	14885:286:-
smaw_01_20252715	C01	20252715	51	+	A	T	GTGGTTATGAGTGTATGTGATCACGTGAGCATGTTTATCTGTGTGTGAACATGTGTGCATGAGTGACTGTGTGTGTCCGAGAGACNNNNNNNNNNNNNNNNNNNNNNNNNNNNNNNNNNNNNNNNNNNNNNNNNNNNNNNNNNNNNNNNNNNNNNNNNATAATATTGGAAACAGTAGGGGACGAAGAGGAGGAGGGAGGTGAGGAAGGGCCTGTGTATCCGCCGAGGAGTTTCCTGCACAATGGCGGCTCCTTCTCCGGCTCGT	14899:51:+
smaw_01_20253218	C01	20253218	237	-	C	G	TCTTCAGCTAATTGTTCAGGTTTTACATTCCGTAATTCTACCGTTCTGATTCAGTTGCACTGCTGGCATGGAGGGGGCCGCCCCTNNNNNNNNNNNNNNNNNNNNNNNNNNNNNNNNNNNNNNNNNNNNNNNNNNNNNNNNNNNNNNNNNNNNNNNNNNNNNNNNNNNNNNNNNNNNNNNNNNNNNNNNNNNNNNNNNNNNNNNNNNNNNTAACCCTTTACAATCGGGGAGACAGAGAGACAACCAACTAATGCTAATGTTGTTGTGTGTCTGCTGATGCTGTGTCAACATAACA	14901:237:-
smaw_01_20270360	C01	20270360	311	-	C	T	AGAGATCCAGACCTCCTGAGATAAGGTGTGTCAGATAGTCGCTCTACAGCAGTAAAAATGTATCAATCCAAAGGATTCTTTACAANNNNNNNNNNNNNNNNNNNNNNNNNNNNNNNNNNNNNNNNNNNNNNNNNNNNNNNNNNNNNNNNNNNNNNNNNNNNNNNNNNNNNNNNNNNNNNNNNNNNNNNNNNNNNNNNNNNNNNNNNNNNNNNNNNNNNNNNNNNNNNNNNNAGGTGGAAATGACAAGAATGGAAGTGCTTCGAGAGATCAGACCTGGAGCTCGCCCAGAGACAGACGCACACAGACGGACGCACAAACGCCG	14917:311:-
smaw_01_20282815	C01	20282815	16	+	T	G	GGAGTTGTATTCTGTTCCACAACATGCTCCTCTGTTCCCCTCAAGGCTCTCTGCTGAGCGTTTAGGTTCACACTGCTCACACACANNNNNGCTCACATGCACTCGCACTTGTACACGCTACGTGCACATACACAGGCACGAAAGCTCACAAGCAGAGACGCTAATAAACAGAGGACGCACAAACATGCCGGCACTCACACAGTGGCAGAATGCTACTGGGAGGCTGC	14925:16:+
smaw_01_20401445	C01	20401445	261	-	T	G	TTAAATGTTTTTATTGTCTTTTTTTACGATAGTGACAGTTGACTAACCGACAGGAAACTATGTTAGAGCGAGGTTCAACACGAAANNNNNNNNNNNNNNNNNNNNNNNNNNNNNNNNNNNNNNNNNNNNNNNNNNNNNNNNNNNNNNNNNNNNNNNNNNNNNNNNNNNNNNNNNNNNNNNAATACCTGGTACACCTCCCTGAGTTTGTCCACAGACGCTCCAACCACAACGCAGGCTTCCAGCAGAGCAGGAGCCAGATGATCGGCCATCGCTGAAGCCTGTTTCTGCTGGACC	14974:261:-
smaw_01_20413635	C01	20413635	282	+	C	T	GGGACTCGGCCAGTCTCAAAGTGAAGCGACAGTTCCACCTGAGCTGTGACCGTCTCTCCTCCATACAGATCCACGACGGCACGCTNNNNNNNNNNNNNNNNNNNNNNNNNNNNNNNNNNNNNNNNNNNNNNNNNNNNNNNNNNNNNNNNNNNNNNNNNNNNNNNNNNNNNNNNNNNNNNNNNNNNNNNNNNNNNNNNNNNNNNNNNNNNNNNNNNNNNNNNNNNNNNNNNTGCTTTGCAAAGGGAAAAGAAACCACGACATCCTGATAATGATTCGTTGTCCGTGTGTGTGCAGGTTGTGGCGACAGCATCGTGGA	14986:282:+
smaw_01_20468795	C01	20468795	36	+	A	G	AGCCCAGTCAGCCAGTGTGGTCTTCGTTTGTGTTCACAGAGAAAACTACGAATTCCTGGAGACTCTTGCGCCTCAGCTCAGGGGGNNNNNNNNNNNNNNNNNNNNNNNNNNNNNNNNNNNNNNNNNACAGTTGGTTCTTTTCGAACTTTTTATCCACTCTGCTGATTTCATTGACTGGAAGGTGCTGGTGGACGTCAGCAACAACCTGAAG	15005:36:+
smaw_01_20538805	C01	20538805	7	+	G	A	GCTCAAGCAGAGGCAGATTGTTGTACGGACGGTTGCTTCACAGCTCAATTACTTCATGCTGTAAGTTGTCAGGCACATCAGTGCCNNNNNNNNNNNNNNNNNNNNNNNNNNNNNNNNNNNNNNNNNNNNNNNNNNNNNNNNNNNNNNNNNNNNNNNNNNNNNNNNNNGCACGCTCACCAGCATATGCACATCTCCAAGCAGGCATTTGTTCTTGCAGAGTAGGAAAAATCCAGTGTTTGCAAACGATGCACAATTTTACTTTGTCC	15042:7:+
smaw_01_20540082	C01	20540082	242	-	G	A	TGCTTCAATTCATTTTCAAAGAACAATGACAGAGGAGGAACAGTCTTACTTAATGTTTATTTCATGTTGCACAGTGTGGGCGTTCNNNNNNNNNNNNNNNNNNNNNNNNNNNNNNNNNNNNNNNNNNNNNNNNNNNNNNNNNNNNNNNNNNNNNNNNNNNNNNNNNNNNNNNNNNNNNNNNNNNNNNNNNNNNNNNNNNNNNNNNNNNNNNNNNNNNAGAATGTGCCATCAGCAGAACCTTCAGCTTGTTAGTCCAGAGTGGAGGTTGTGTATGAAAATGGATGTGAAAGCAGAACGCAGGA	15043:242:-
smaw_01_20546895	C01	20546895	127	-	A	C	GCTCTGCCTGTGACTGGGATTCAGCGCTGGGACTCCTGTGAGGCCTCCTCTTCCTGACAGAGACAGATACTGGCTCAGCCTCACANNNCCCCAGGAGACAGCTGCTCCCTGCTCTCTGCACCCTCCTTCTCCTCATCCTCATCTCCCCACTCTCCCATTGCCTCCCTTTCTTTC	15049:127:-
smaw_01_20547033	C01	20547033	4	+	T	C	GCCTACTCCCGTCTAAGCAGACACACGGCAGACAGGGACACCGAGGGGGGGGGGGAGCGAGACCGCGTCGCGGTGACTTTTCCCTNNNNNNNNNNNNNNNNNNNNNNNNNNNNNNNNCCAGGATGCAACTCAAAGCCGTTTTGGGAAAGGGGTCACCATAGCAACCCCAGGAGTTTCATTGACTGCTGTTACCCTGACAACAGC	15050:4:+
smaw_01_20550218	C01	20550218	175	-	A	G	TGAAATGCTCACAATTCATAGACATGTCCCCTTTGACAACGGGTCACACATGGACATTGCATCATGTGATGGGATCATAAGAGCGNNNNNNNNNNNNNNNNNNNNNNNNNNNNNNNNNNNNNNNNNNNNNNNNNNNNNNNNNNNNNNNNNNNNNNNNNNNNNNNNNNNAGTTATTCATTCTTTATGTGGATTTTGTTGCAAAATGTTGCACAATCACCATGAATCAGACAGGACGACAAAAGGCAGTAAAGGCCATTTATTTCCAACC	15056:175:-
smaw_01_20600623	C01	20600623	47	+	A	G	GACTTTCATAGTTTATAAAGCTTATTTTAATTGAAACAAACTCCCCACTGCCGATTGGTTTGAATGGAAATATAGGTGCAACGGTNNNNNNNNNNNNNNNNNNNNNNNNNNNNNNNNNNNNNNNNNNNNNNNNNNNNNNNNNNNNNNNNNNNNNNNNNNNNNNNNNNNNNNNNNNNNNNNNCTGGCATGTCACATCATTGCAGGATGTTAAGAGTGAAGTACAGTAGGGTTGTTGCGTCGGAGGTTTAGGGGGGAAATATCGCCTG	15071:47:+
smaw_01_20648360	C01	20648360	66	-	A	T	CGCTGCTCAATGTGGGTCAGGAGAAGCAGCACTCTGTCTTCTCCCCGTTCCCTATTCTCTCTCCCTCTTTTTTTCATCCCTAATCNNNNNNNNNNNNNNNNNNNNNNNNNNNNNNNNNNNNNNNNNNNNNNNNNNNNNNNNNNNNNNNNNNNNNATCTTGCATATCTCCCACTCCGCCTCCCCTACGCTCTCCTCTTTCTGTTTCTCTCCAACCCCGCTGCTCCCCTCCTTTGTTACAT	15108:66:-
smaw_01_20651168	C01	20651168	23	+	C	A	GACAAATCTCTTCCTAATCTGCCCTGTGAGCTGCCCCACAATGAGAGTCTCAGCTTCAATTCAGCTGCAAAGTGACTGGGAGTAANNNNNNNNNNNNNNNNNNNNNNNNNNNNTGCGCACACACATACACACCCCAAGGTCTCCCCCATCACCTCCCCAGAGATATTCCCCTCAGTGCAGGCAGGGCAGGCACTGATA	15111:23:+
smaw_01_20706724	C01	20706724	35	+	G	T	TGAAATCCATCCCGATTCTCTAACTAATGACCATGGCGACTACAGTGGGGAGAAATCATTAAATCTTTGTAAATCAGCTGTTGAANNNNNNNNNNNNNNNNNNNNNNNNNNNNNNNNNNNNNNNNNNNNNNNNNNNNNNNNNNNNNNNNNNNNNNNNNNNNNNNNNNNNNNNCCCCCTAGAGAAGACATCTTTAGACCCCACAGAGGTAGGGGCCCTCCCAAGAAAAGGCGTCCCGAGATCGAGTCAGATTCAGACAATGAGGCAGAGGCC	15146:35:+
smaw_01_20735651	C01	20735651	133	+	T	C	ACATTATGGCAGCCGTAGTGCTGAGTTTAAATGTGGCGACAGACAGAAGAGCAGCTAAGGAAGAGCGTAGGGCTCGGGAAGGGTGNNNNNNNNNAGAAGGTCCAACAGGTACAGTATGGGGGCGCCAGGTTATGTGGGGCTTTGAACACAGTAAAGGATTATGTAGTGTATTCTTTGCGNNNNNNNNNNNNNNNNNNNNNNNNNNNNNNNNNNNNNNNNNNNNNCAGTTGGGTGACGCGGAGACTGCAGTCCCAGTGTCCTCCGCTGAACAGCAGACGTCCGTCGTTGGACACCACCAGCACCTGAGCG	15163:133:+
smaw_01_20777059	C01	20777059	64	+	C	A	TTACAGCTGTGTTCATCAGACTTCCTTATTTGTTCCTCCAGCTGTTTGCATCGCTCATTCTGACTGGACAGCTTTTCGGACAGCANNNNNNNNNNNNNNNNNNNNNNNNNNNNNNNNNNNNNNNNNNNNNNNNNNNNNNNNNNNNNNNNNNNNNNNNNNNNNNNNNNNNNNNNNNNNNNNNNNNNNNNNNNNNNNNNNNNNNNAGTAAAAAGCTTCTTTCTTATTGATGTTTCCACTTAAAAAATATCTCATTCACATATAACAAATGCCACTTTTTATTTAATCATA	15199:64:+
smaw_01_20811558	C01	20811558	77	-	C	T	AGTTCCAGGATGCTCAGGCTGACAGAGTCGGCTCCAGACCCTCGTCCAACCTGTCCTCCCTCTCTAATGCCTCTGAGAGGGACCANNNNNNNNNNNNNNNNNNNNNNNNNNNNNNNNCAGAAAGGAGCACAGTTATTATTTGGTGTTACAGTTTGTTTTAATAAACTTCATATTATTGTAAATTCAAATGCCATGATAATATCTTGCTGGGCTCCTTGATTAATGTCAGCGAAATGTTACACCTCCACTCTCTTTTGCAACATTTTCATTGCCTTCCAC	15211:77:-
smaw_01_20856663	C01	20856663	47	+	G	C	GGCTGGTTGGGAAGGGGCAGAGGGGGCAGTAGCTCTGGCTGTGTGAGCTCTGGATGGTGATGTGATGTGAACTCTCAGGTCTGTGNNNNNNNNNNNNNNNNNNNNNNNNNNNNNNNNNNNNNNNNNNNNNNNNNNNNNNNNNNNNNNNNNNNNNNNNNNNNNNNNNNNNNNNNNNNNNNNNNNNNNNNNNNCTGCTGCTTCATGTCGTTGCCTGCATTTTGGATTGTCTGCCCCCACAGTTCCTCTGTGTGATTTTCTCCCGTTGAAACAGGGACTTTGTAATTTAATGCGCTGTATCCTTCCAGAGGGAGATTTTTTTTCTTTTTCTA	15243:47:+
smaw_01_20859122	C01	20859122	18	+	A	G	CCCACTTTGCTGGAAAGATTATACAGGAAGGACTGAAATCTGCCTCAGATGGCATCCTGCTGCCTCAGTTGGCCGCGCATCTGCANNNNNNNNNNNNNNNNNNNNNNNNNNNNNNNNNNNNNNNNNNNNNNNNNNNNNNNNNNNNNNNNNNNNNNNNNNNNNNNNNNNNNAGATAAGTAAGAATTAAGAAGAAGGAAAAAGAGAAGAAAAAAATGGGGGGATGGTGGACACATGAAAGAAAAAAATCTTCCCTCGC	15245:18:+
smaw_01_20866812	C01	20866812	82	+	T	A	ACGAGCGGATCCACGGGAACTCTGGACAGCCACCGCAGCTCCAGAGAGTCGCTGCACTCTCAGGGAGCTGACTCCATCTTCTCTGNNNNNNNNNNNNNNNNNNNNNNNNACACGGACCCCAGCGGAGAGAGCCACAGCGTAGGTGCATCGGACACTGCTACGCCCATCATTAAGATTGAAGGACCAACTAAAGAG	15255:82:+
smaw_01_20879896	C01	20879896	26	+	T	C	TGTAAAGAAAGATTCACACCTCAATTATCACCATTTGAACACCACAGGAATTTTTCACACATTCCTGTCACTTTTCCTCCCTCACNNNNNNNNNNNNNNNNNNNNNNNNNNNNNNNNNNNNNNNNNNNNNNNNNNNNNNNNNNNNNNNNNNNNNNNNNNNNNNNNNNNNNNNNNNNNNNNNNNNNNNNNNNNNNNNNNNNNNNNNNNNNNNNNNNNCAGCAGCACCTCCTCCTCCAGCAGCCAGTCGTCCTCCTCCCTGCTGGGCTCGCTCAATCTCCACCTGTGCTCCTCACCCTCTCACCCACACACACATCC	15264:26:+
smaw_01_20912195	C01	20912195	10	-	C	G	CTAACATTTGAGATGGTCTTCCAGTATGTTTAGAACAGGACATGCCTGTCCCCACCCACTCGAAGCAGAGGTCACCCTGCTGCACNNNNNNNNNNNNNNNNNNNNNNNNNNNNNNNNNNNNNNNNNNNNNNNNNNNNNNNNNNNNNNNNNNNNNNNNNNNNNNTGAGCAGCCTTTTATTAGCATCAGTGATCCATGAGTAAACATGGCAAGTGGTTGGAGTCAGGGGTTTACACGCAGGACTTCTAAAGGTATTTCCAAGACGGCGTTGAAGGACGCTGGGTGGCTGATGGGAGAAACAGACCCGCAGGACTCGTCCCGGCGGCTGAGAGGGCAAACGCTAGTTACGGCTTTAT	15281:10:-
smaw_01_20916274	C01	20916274	231	+	C	G	CCAATCACGTCTGACCAGTTTTCATCGTAGAAATGACTAGAAAAAGGGGGCTTTGTGCTTTCCACGTTCGTCATTATTTGTACTGNNNNNNNNNNNNNNNNNNNNNNNNNNNNNNNNNNNNNNNNNNNNNNNNNNNNNNNNNNNNNNNNNNNNNNNNNNNNNNNNNNNNNNNNNNNNNNNNNNNNNNNNNNNNNNNNNNNNNNNNNNNNNNNNNNNNNNNCTTTGAATGGCACCCACTCACTTGTCTGAAGTCACTAGAGGAGGACTTGCTTTCAAAGCATTCAGTGGTCTCAGTGCTTCCCATGC	15287:231:+
smaw_01_20919653	C01	20919653	234	-	C	T	AAATGACTGGGTTGAGCTTCCTACTCACATCGTTCTGTCGCCATCCCACAGTCGGGCCGCTAGACACAATAGAGCTATGAATGGANNNNNNNNNNNNNNNNNNNNNNNNNNNNNNNNNNNNNNNNNNNNNNNNNNNNNNNNNNNNNNNNNNNGTTAAACCGCACTGTACCAATTTGCGTCTCTTGCCCCCTCCAGGTCAAAAGCATCACTCATTAAATTCAGTGAGCTGGGGCGTCGATGAGATCACTTGGCAGCCGCCGGCGCCCCATGTGCAGATGCTCGAGTCCTCCTGCAGCGGCCACAGGT	15295:234:-
smaw_01_20921867	C01	20921867	79	+	T	C	TTTTGGTTAAATCCAGTGCGGGGAAAAAAAACATACAACAGTGACTAATCGTGGGGCTTTCATCTTTCATGACGTGACTCTCTGTNNNNNNNNNNNNNNNNNNNNNNNNNNNNNNNNNNNNNNNNNTCGCGCACAGTTGCAGCCACCAACATGAACGAGGAGAGCAGCCGTTCGCACGCCGTTTTCAGCATCATTGTCACACAAACACTTT	15297:79:+
smaw_01_20935413	C01	20935413	226	+	T	G	GCATGCGCTCATGTGTGGACAGCCCTGCACTGCTCCCCCCTCCCTGCCCTTGGCGCCGACCCAGGGCAGGCAGCGAGGGCCACTGNNNNNNNNNNNNNNNNNNNNCCACTTCCACCCCCACCTCCACCTCCACTCCCACCAGCAGACAGCTCAGCCACACACTGCCACGCACTGCTGTAAGTGCTATACTNNNNNNNNNNNNNNNNNNNNNNNNTTACTGTAAGTTTTACACTCACATTGACATGAAACATGCTCACACGGCCAAATACTTTGGTTCAAGGCAACACACGTGTTCCCTTT	15319:226:+
smaw_01_20936603	C01	20936603	62	+	C	G	GATTGAGCCGCAGGGAGATCCTGTGGTCCAGGATCTGCTCACTCACCCTCAGGGCTCCTCGCCTGTCAGTATTCCTAATTGCAAANNNNNNNNNNNNNNNNNNNNNNNNNNNNNNNNNNNNNNNNNNNNNNNNNNNNNNNNNNNNNNNNNNNNNNNNNNNNNNNNNNNNNNNNNNNNNNNNNNNNNNNNNNNNCATTTTACAGAGAGATGGCAGCAGGAGGGTATGGAGCAGAAGAATCCTGAAAAGGTGGAACCATGTGACACTGGCAGTCAACACT	15325:62:+
smaw_01_20959146	C01	20959146	5	-	G	T	GCGGCTGGCAGGCGTACACACCAATGTCATACAATATGTGTCCAAACATGGGTCTTAGTGCTTGGGTAAGTTTCTGCGCAGCCCTNNNNNNNNNNNNNNNNNNNNNNNATAGTATATCCACATTGGCTGGAAACAATGACGACACCTCCCAAGGTACATCTTCCTGCTGGCGGAGACCCTGGGAGAGCAAAGC	15338:5:-
smaw_01_20984831	C01	20984831	24	+	A	G	GGGCTGTCTCCTGTCAGAATGTCATTGAGGTCGAAGTCAGTGGGGATATACTTGGGCTTCTGCCAGCACCAGAAACGCCTGCGCTNNNNNNNNNNNNNNNGCAGGGCGATGGTGTCGTTCAGGCTGGACACTGGGATGAGCAGACCTCCAGCATCCACCTCCTCCACAAAGTTTCTGGTCGCTGTGGCAAACATCTCCCGGCTTTC	15352:24:+
smaw_01_20985544	C01	20985544	186	+	G	T	TAACACACTACTAGCAGCAGCAGCAGCAGCAGCACATCACTGTTGTTGTTATGATCGCGATCGCAAGGTCAGCTGCTTGAGGAGCNNNNNNNNNNNNNNNNNNNNNNNNNNNNNNNNNNNNNNNNNNNNNNNNNNNNNNNNNNNNNNNNNNNNNNNNNNNNNNNNNNNNNAGAGGTTTTCTCTTTGTGGACAGACTTTCAGTGCAGACCGTCGGTCGCCTACTTCCCCATGTCAGTCTCCTCCGCTGCTGCTGCTCACTGACG	15354:186:+
smaw_01_21041680	C01	21041680	216	-	C	G	CAAAGCCTGTGTGCGATCTGCACGGGCCTGGGCACAAGCCTTGTCCCTTGTATACAGAGCATTTGCTTTCTACAGTAGGTCCTGCNNNNNNNNNNNNNNNNNNNNNNNNNNNNNNNNNNNNNNNNNNNNNNNNNNNNCAGCTCAGCCAGGGCTGTAGCAGCTCCATGCCCTCTGAAGGCTAAGTGCTCACTATGTGGGCTCCAGTGTGAGCACATGGTTGAA	15385:216:-
smaw_01_21054047	C01	21054047	28	+	A	T	AGGTCCTGGGCATGTGCTGCGACTCCGACTCCGACAGGTATTGTAATGTCACGCTTTGGGGTCCTTCTCCACTCCACAAGGTCAGNNNNNNNNNNNNNNNNNNNNNNNNNNNNNNNNNNNNNNNNNNNNNNNNNTATTATTCTTATCATTCTCTAAATGATACGATTTTGCTTTGAATTCACTTTCAGTAGGATATTTTATCTTTGCTGTTCCAGCTCAGAGTGCAGAGATCCGGAGCCTCAGATTAAGGATACGGAAATAAACAAAGCGGAGAGCACAGCTCCACTTG	15395:28:+
smaw_01_21055291	C01	21055291	25	+	T	C	GGGGGGCAGAGAGGTGACGTCACCTCACACTTGCTCTGCTCTGAGCAGCAGGAACCGTTTGGACAGTGGGGAAAGCCCACAAAATNNNNNNNNNNNNNNNNNNNNNNNNNNNNNNNNNNNNNNNNNNNNNNNNNNNNNNNNNNNNNNNNNNNNNNNNNNNNNNNNNNNNNNNNNNNNNNNNNNNNNNNNNNNNNNNNNNNNNNNNNNNAGCAGCAGCGCCCTGCACCTCCGAGCACTTGCACTGAGGCTGCTGCACATGTTTGCTTTGGGTGGATATTCAGAAGGGTTTTATG	15401:25:+
smaw_01_21069958	C01	21069958	36	-	G	A	AGATGACATGCCCATTCCAGCACAGCCTCCGCTAACGGTGGCGCCATCGAGCAGACCTCCTCCTCCTGCCGCAGGTACACAGCACNNNNNNNNNNNNNNNNNNNNNNNNNNNNNNATACCGCGGTTAAGAAGAAGTGACACTTAGAGGAAGTTCCTGTGAACATGTGCAACTGAAAGTTGCGACTGCACCAATGCTGGAAA	15409:36:-
smaw_01_21084287	C01	21084287	85	-	C	G	TCAAAGAGGGCAAAGAGTCAAATATGTAATATTACTGTAAGATAGGCCTCAAGCAAGCAGTGGACTCCCGCTCACACACACACAGNNNNNNNNNNNNNNNNNNNNNNNNNNNNNNNNNNNNNNNNNNNNNNNNNNNNNGGGCGGAGGGTATGGTGGGATTGTATGTCCTAAAACGTCTAATTACTTTACAGCCGTCTACCAACAATTACACTGTGTCGGTGCAGAAAAG	15419:85:-
smaw_01_21123461	C01	21123461	24	+	C	A	TTTTACATCTCTGCATTTTATGTCAACGTTAAGATAGAATTTTGTGATAACAGTTCAGTTTAAATACATTTATGGACTGAGATGANNNNNNNNNNNNNNNNNNNNNNNNNNNNNNNNNNNNNNNNNNNNNNNNNNNNNNNNNNNNNNNNNNNNNNNNNNNNNNNNNNNNNNNNNNNNNNNNNNNNNNNNNNNNNNNNNNNNNNNNNNNNNNNNNNNNNNNNNCACAAAGGTGAGATACGTGGCGCTAGCACGCCGTTCCTGTTCCGTGCTAACAGCCCTTCAGAGGACGAGCTGCTGACTGTGGAGGATGAATGCAACTCTGACATCCTGGTGGTCACCACCAAGGCCGAGATCG	15443:24:+
smaw_01_21125927	C01	21125927	184	+	A	G	ATGGGTCGGGGGCACCAACAATCCTGCTCGCCGTAGCTTATGATGCTTTCAGAAGTGCCCTTGTAGAAGGTGGTACGGGCTGTAANNNNNNNNNNNGTCCTCTTAAGTCTCTTGAAGGAATGGAGTCGCTGTTTGTTTTTTTAACTATTGCCGAGCTGTTTGCTAGTTGGGGCCAACTTGTCCACAAGGTGAACTCCCAGAAACTCAATGTCACTGACCCTCTCCACAGCAGCGCCATGGATGGTCAGCGGCGTA	15448:184:+
smaw_01_21128768	C01	21128768	232	-	G	A	TTCAGGTTTTCATTGGTCCTCAGCTGCTCCTTAAATTTCACCTCCATTTTGGCCAGCTCATCAGCAAACATGCAGCTACGCTCCTNNNNNNNNNNNNNNNNNNNNNNNNNNNNNNNNNNNNNNNNNNNNNNNNNNNNNNNNNNNNNNNNNNNNNNNNNNNNNNNNNNNNNNNNNNNNNNNNNNNNNNNNNNNNNNCTTGCATTTTCTGTACTTGTCATTTCGGTCAGACGCCTCTCTGCTGATCCCTTTGAGCTTCTCCTGGATGATGGCTTCCAGCATA	15451:232:-
smaw_01_21162978	C01	21162978	56	+	G	A	TCTGTGTCCAGCCTTATCCCTACGCGGCAATTGAACTCTGTGAAATTGAAGGGACGTCACATGTTTACGAGGACAGTGGTATCCTNNNNNNNNNNNNNNNNNNNNNNNNNNNNNNNNNNNNNNNNNNNNNNNNNNNNNNNNNNNNNNNNNNNNNNNNNNNNNNNNNNNNNNNNNCCACTGAGAAGCAATGCTTCCACAGGAAGCCATTAGGGCCAACCAAAGGCCCCACGCACAGGGTTTCTCCACAGGAACTTCCTAC	15475:56:+
smaw_01_21183610	C01	21183610	54	+	T	C	CCTGAGGCCGCCCGCTGTGTGTTAGTGTTGACCCTGTGGTATTTTAACTCCTGTCTCACTGGTCACAGAGAGGAAGGGCCGCGGCNNNNNNNNNNNNNNNNNNNNNNNNNNNNNNNNNNNNNGCAGTTAGCAGGGACTGGGTTCGAACAGATGGGGGAAAAACAGTTTTCAGAGAGCAAATTTTTGAAATAACTTTCATAACATTGGNNNNNNNNNNNNNNNNNNNNNNNNNNNNNNNNNNNNNATGCAGTGATGTGTCACTATGTCAGGCATCTGTTGGTATGACAAGCAGAAACTGTACTCAGCCAGAACAGGCTCGACAAGGTCAT	15485:54:+
smaw_01_21186738	C01	21186738	69	-	G	T	GTCTGCGTGGGCTGCATCTGCTGGGTCGCAGGTGACATCTGAAACGTCGAGGAAGAGTGTTGGCATCGCCTGAGCTCTTTGATGANNNNNNNNNNNNNNNNNNGCATCCAAACAGACATGTAAGCATTCAGACACACCTGTGAAACAGCCAGTCACCTGTCTGCTGTCACCACTCCACTGACCTCAAAGCCCCCTGCCTCTAAACAAGCATCTATACATTACCTCCTGCATCTATTCCACGTCTGGCAACTTCCCCAAAAACAACATCTGTTGGTGCCAC	15488:69:-
smaw_01_21193442	C01	21193442	33	-	C	A	ACGTCATGAAGAGCGTCAAACCGTGGCTGGGGGTGCTGATGGACAACTACAGGGTGAGGGATGGAGAAATGTCCACCGTGGTTCGNNNNNNNNNNNNNNNNNNNNNNNNNNNNNNNNNNNNNNNNNNNNNNNNNNNNNNNNNNNNNNNNNNNNNNNNNNNNNNNNNNNNNNNNNNNNNNNNNNNNNNNNNNNNNNNNNNNNNNNNNNNNNNNNNNNNNNNNNNNNNNNNNNNNCTCTTTCCTCATTTCCAGGTCTTGATCTACAGCGGTCAGCTGGACGTCATTGTAGCTGCTCCGATAACCGAGAGGTTCCTGCCCA	15496:33:-
smaw_01_21203269	C01	21203269	188	-	T	A	GGATTACACGAGCACACTACTGCACAAAAAACACACACGAGCTTCACAGTGTGTATCCGCACTCCAAACACCAAACACACACATANNNNNNNNNNNNNNNNNNNNNNNNNNNNNNNNNNNNNNNNNNNNNNNTCGGAGTTTGTGTGGCGCCTGATGATCATGGAGAATTTTAAATTCTAGGGCAGCCAGCCCCCCCGCCCAAAAAGAAACAGTTATTAATTGTGTTGCCCTCCATTACTCACCAGTCAGAGGCATTCA	15507:188:-
smaw_01_21217458	C01	21217458	183	-	C	T	TGAAACAAGCTTATTTAAAAGTATGAACCCGTGAATGAAAACCTCAGAGACCTAGATCCCAGGGCAAATAAATGTGACGTCTACANNNNNNNNNNNNNNNNNNNNNNNNNNNNNNNNNNNNNNNNNNNNNNNNNNNNNNNNNNNNNNNNNNNNNNNNNNNNNNNNNNNNNNNNNNNNNNNTCGGGGAAGCTTGTCTCAGTTTTTTTTGAGGCAGACATTTTCTTCTCCTCTTACCACCCTCCCTTCCTCCCATTCTTCAAAATTCNNNNNNNNNNNNNNNNNNNNNNNNNNNNNNNNNNNNNNNNNNNNNNNNNNNNNNNNNNNNNNNNNNNNNNNNNNNNNNNNNTGAATGCACATGTCCACCACCATGGGTCGCGTCGTGTTGTGAGCTTTGACAAG…	15520:183:-
smaw_01_21232199	C01	21232199	73	+	A	G	CCACTGCAACATTTGGTGGTGCGCCGAGACATCTGTGGCACAAATCTGATCGGACTGGTTGAGGGAATGCACATGATGGGATAAANNNNNNNNNNNNNNNNNNNNNNNNNNNNNNNNNNNNNNNNNNNNNNNNNNNNNNNNNNNNNNNNNAGAAATAGGGCCTGCTAATGGAGTTAAATGGTCTCATCGAGCCTCCCAACATCCCTGCTGCCGCACTGGCTGGCATCCCGTCCCCAA	15535:73:+
smaw_01_21282759	C01	21282759	29	+	A	T	GAGGGAGTCAGGAGACATGCCTTCTGGCAGGAGCTGAAGAAGACAGCTGTGTTTGGTGTGGTATTTTTAAACGCATCAGTGCCGCNNNNNNNNNNNNNNNNNGCCTGACCTATTTTTAGCCAGGGCTGGCCATTGTTCTATTTCTGTCACCTGTGGGCCACGCAGTTGTTGATTCACATGCAAATGAAGCTTGCGCCCTCCCCGGCATTGCGTTACCGCCTCGGCGAGGTGCTCAGTGCGCGGCGCGCGGC	15563:29:+
smaw_01_21287022	C01	21287022	193	-	C	T	GTCGCACCGCCAGTGTCCCCAAAGTGTTTATTTCTATAACCGATATGCCTCTCATTAGCCTTAGTGGTTGTCAGAGTGACAATCANNNNNNNNNNNNNNNNNNNNNNNNNNNNNNNNNNNNNNNNNNNNNNNNNNNNNNNNNNNNNNNNNNNNNNNNNNNNNNNNNNNNNNNNNNNNNNNCGACATTACTATGACACGCGAGGTGTCTGAATTACAGAGACACACACAGTAAATCATTATCAACGTGCGTCATCGTGCAGACTCA	15566:193:-
smaw_01_21289032	C01	21289032	109	+	T	A	ATGGGGAGACGTAATTATGTCGCCAGCGTTGCCATGGCAGCGGCAAGTTAGGGTGGTGGATACTAGGGTGTGGGGGTTGTCACAGNNNNNNNNNNNNNNNCTTGCTTTTATGTTTCTATTTATAATCATCGCCGCCACCGCATACACATGGAATGGTTGCAACGAAAAGACAGGCTACATGACAA	15568:109:+
smaw_01_21303686	C01	21303686	82	-	C	A	TTAGTAAAAGGTAAAACAGGGTCTTGACAGGGAGAGCTGGCTTACTGTGCAATAGCTGCTGCTGTTGCTGCTGCTGCTTGCGTGCNNNNNNNNNNNNNNNNNNNNNNNNNNNNNNNNNNNNNNNNNNNNNNNNNNNNNNNNNNNNNNNNNNNNNNNNNNNNNNNNNNNNGCGAATGTTGCGAGTGTGTGATCTCATCCTCTTCCCATCTCAGATCATGGCTCTTATCACCAGTCTCCCTTTGACCTGGTGCAGATAGGTGCTCTGCTCTGACTCTAAGCTCTGACCGGTCAGAGCCTCGTCCTCGCTAT	15573:82:-
smaw_01_21329805	C01	21329805	48	+	G	A	ACCTGGTAGAGGAAGTCGATGTACCTGGAGGCGAGCTTCAGGGTCTGGATTTTGCTCAGCTTGTCCGAGGGCAACGTGGGGATGANNNNNNNNNNNNNNNNGAACGCCTCGTTGAGGGACTGCGTCCTCTGTCGCTCGCGCACGTTGGCCATGACCCGCTGCGTCTGGAGCTCCTCGAACGACTGGGGGCTGCCGCTGCTGCCGGGG	15599:48:+
smaw_01_21333259	C01	21333259	213	-	G	T	GTGGGACATTTTGAAGCCATTTCTGGGGGGAAGCACTGTCATCCAACACTGCCGCTTGACCTTGTAACTCCTTTAGGGTTGATCGNNNNNNNNNNNNNNNNNNNNNNNNNNNNNNNNNNNNNNNNNNNNNNNNNNNNNNNNNNNNNNNNNNNNNNNNNNNNNNNNNNNNNNNNNNNNNNNNNNNNNNNNNNNNNNNNNNNNNNNNNNNNTTTCACTGTCAATTGTGGGAGCCTTGTACATGTGGACGACTGTGGTTTGTTATTCCAATAGATATGAGTAGGCTGATAGAGAGACGCTGCCTTCCAAGGCC	15601:213:-
smaw_01_21405143	C01	21405143	34	-	A	G	AGAGCGGGCACGCCGCTCCCGCTCCCGCCGCCGTCGTCGTCGTCGTCGGACATGTTCGCCCCACGACCATCGACGATGCCGTGGCNNNNNNNNNNNNNNNNNGTGGGAGCCGATGACTCAAATATTAGCTCGGCTCCAGAACAGTTTTTTTTTTTACTCCCAAGTGTCTGTTTGCTAACAAGGGGGATTAGCATGTGTTCCGCATTCCGTTGCCTAGCAACAGCGGAGACACCCTCAATCACTGCCAGGTGCTAAAGTGTGAAGTTGAAAAA	15630:34:-
smaw_01_21448980	C01	21448980	233	+	G	T	AGCTCCTGGGCCACTGCGCCAGCATGGGCCTTCATACTGAGGTACGAGTCCATGGTGATGTACACATGACACAGCACTGCAATGGNNNNNNNNNNNNNNNNNNNNNNNNNNNNNNNNNNNNNNNNNNNNNNNNNNNNNNNNNNNNNNNNNNNNNNNNNNNNNNNNNNNNNNNNNNNNNNNNNNNNNNNNNNTACATGTCTCCCTTCAGGAGCGTTGGGAAACAACGTACGATGGGAGGAATGTGCCGAGAACTCCATGTTTTTACGACTCACCTTCCTTGGTCTCCCTCCGNNNNNNNNNNGACCGGACTCCGCTCTCTCTCAGGCTCAATTGGTGGAAAAGTGCTTTGCTCTGTCAGAAGGGGAAATGCGTGGATTTGGGACACA	15657:233:+
smaw_01_21555878	C01	21555878	324	-	T	G	ACACGTTCTCTTGTTGTGCGATACTCGAGGGCAAACTCACTCAGGATCTTGCTGAAGCGATGAATGCTGACCTCTCGCACCGCGTNNNNNNNNNNNNNNNNNNNNNNNNNNNNNNNNNNNNNNNNNNNNNNNNNNNNNNNNNNNNNNNNNNNNNNNNNNNNNNNNNNNNNNNNNNNNNNNNNNNNNNNNNNNNNNNNNNNNNNNNNNNNNNNNNNNNNNNNNNNNNNNNNNNNNNNNNNNNNNNNNNNNNTGAATATACCTGTTGATGATTCTTCGGTGTACAATCTTGAGAATAATAATTCTCTCTGCGCAGTCTTTGAGGAAGTCTGACATTTT	15719:324:-
smaw_01_21598288	C01	21598288	45	+	T	G	TCACAATTACCTTGTTTAATGTCAGTCGGTGTGAATCTTTTAAGTGTTTTAGTATGATATTTATGCTGTATCCTGCTAGGTGAGANNNNNNNNNNNNNNNNNNNNNNNNNNNNNNNNNNNNNNNNNNNNNNNNNNNNGTCCGCTGGAGCCTCCTACATTATCTCTGTAACTACTACACAAGGCAGAGACCAGAGTGACGCCCTCATGGCCGTTATCACCACANNNNNNNNNTTAGATAAGCTCACTATTATGTATGGATAATGTTTGGTTGTATTGGCATGTGGCAACAGCAATAAACCAAAATTTGGATTGTCTCGC	15743:45:+
smaw_01_21625048	C01	21625048	244	-	G	C	GTGTTGCATTTACTTGATCACATTGAGGCTTGAGAGTGTAAGTATGATTTGGCTGTTTGCATAGATGCGCAACTGTGTGCTTCTGNNNNNNNNNNNNNNNNNNNNNNNNNNNNNNNNNNNNNNNNNNNNNNNNNNNNNNNNNNNNNNNNNNNNNNNNNNNNNNCTATCTATATAACATATTTCCTCTTGTTCACATTTCAATCTGGTCTGTATTCTGTCCAGTGGTGGTCACGCAGAGGGGTGCCCGTCCCGTCAGTGCTCCGGTCTTCTCCCAGGCTGCTCTGGCTGAGGCGGGGATCCCCATGGCGCCCTTCGAGCAGCCCCAGACCTCCACTCC	15752:244:-
smaw_01_21679457	C01	21679457	7	+	A	T	CGACGTACACAGTGAGAGTAAAAAGAAAGAGGGAGATGACAGAAGAACAATGTCACTCTTGCCTCCCAGACACGTAGTTGCAATTNNNNNNNNNNNNNNNNNNNNNNNNNNNNNNNNNNNNNNNNNNNNNNNNNNNNNNNNNNNNNNNNNNNNNNNNNNNNNNNNNNNNCGTAATGGAGAAGATGTCATAGAAAATAAGTTGTGGCAATCCCATGCGTTTGAATGGCCACATGAGCTGTGTTCCTAATGGAGCT	15780:7:+
smaw_01_21681946	C01	21681946	174	+	G	A	CTACAGCCTCCCAGTGTCGTCCGAGTATGGGACACAGCAGCAGCTCCCAGTCTCTGGGGACACAATGTCTCAGACATATGTAAGANNNNNNNNNNNNNNNNNNNNNNNNNNNNNNNATGTTGTATTTAAGTAAGCGCATAATCCTACTTTAGTGCTGTTGACATAGGTCACACGTTTTCTTTTGAGCAGGACTGCCCGATGTNNNNNNNNNNNNNNNNNNNNNNNNNNNNNNNNNNNNNNNTGGGTCTGAATCAGACGAAACAGATGTGTTTCGGTTTGTCGATGGATGCCACCAAACTGGAGGAGGCCAGGATGCAGCTCAGCGG	15781:174:+
smaw_01_21725996	C01	21725996	60	-	A	G	ATCGGTTAAAAACATGTTGCCACAGCTGAGCTAAACACGTGATATATTTTGGTAATTCTTTGCACCGTTAGTGACTCATTAATGTNNNNNNNNNNNNNNNNNNNNNNNNNNNNNNNNNNNNNNNNNNNNNNNNNNNNNNNNNNNNNNNNNNNNNNNNNNNNNNTATGGCTTGGTGTTTACAGAATGGTTGGGTAACACGAACCAAAAGTGAGTCACTGTTTTTTCTCTAGATTGGGGAGATATTGTTGACTGACGGATGCTCGGAGCAGTGTAACTGCTCCGACACTTCCACCATGTGCTGTGTG	15812:60:-
smaw_01_21750868	C01	21750868	23	-	C	T	AGCTCACAGGATGGATACTAAGGTGAGCACAGTGGGCCTGAATGGATGACTAAATATCAGAGGGCCGAGGGGAGATTGATGGAGGNNNNNNNNNNNNNNNATGAACAGACACAGAGAGAGGGAGTGATTGAGAGCACTGGATGTGACAAACGGGCAGGCGGGTCAGGCCAGGGGAAGCGGAGAGA	15822:23:-
smaw_01_21754452	C01	21754452	289	-	C	T	TACGACGTGAATCAGTTAGTAAATTGCCAGAAAACGGACTGACATCACTGCGGCTGGCGCTGGGGAAGATGCAGCAACTCACGAANNNNNNNNNNNNNNNNNNNNNNNNNNNNNNNNNATCTGAAGGCATCATTTTCCAACACGTACCCAGATGAGAAGCTGACAACAGCTGCCATATACTGCTCGTATACGAGTGATATGAANNNNNNNNNNNNNNNNNNTTAGTCCGTGGGAATCCCCACAATAGGATTGTACTGAGTGGTATTTAGCATGGTAATGTCTTCAGAAGGTAAAGCCATATCTGGGG	15824:289:-
smaw_01_21770177	C01	21770177	63	+	T	C	TTCTGCCTGTGCCTAGAGCGCAGTCAGACAGTCAGCAGCTCATTTCAACATCCCTGAATAGATGACTGGGAGGCAAGGCACCAGGNNNNNNNNNNNNNNNNNNNNNNNNNNNNNNNNNNNNNNNNNNNNNNNNNNNNNNNNNNNNNNNNNNNNNNNNNNNNNNNNNNNNNNNNNNNNNNNNNNNNNNNNNNNNNNTAATTACATAGAGTACTTACATCAATCCCACAGCATTTAGAGCTTACATTGACTTGCATTGTCTGGCTCTGTAGTGGAAATCAGG	15840:63:+
smaw_01_21773400	C01	21773400	60	-	A	T	GACAAATGACTTTGTGTAGCAGATCTGAGTACTTCTTCCACCACTGGCCAGACATAACCTCGGTGTGATGTTTTTAACTCAAGCANNNNNNNNNNNNNNNNNNNNNNNNNNNNNNNNNNNNNNNNNNNNNNATTTCTTCTGTCTTTCCGTTACATCTCAAAGAGTCACCGTTCTGAGCTCTGATAACGGGAGGCAGCTGGCATGTCACGCCAAGAACCCCGCCCTTTCCCGGCCTGTGGAGACCAAGCTGACCATGAGTGTTTACTGTAAGTGTCTCAG	15846:60:-
smaw_01_21805602	C01	21805602	194	-	A	G	CCTCCTACTAGCAGTGGGACGCTACCATCTGGGAGGACCACTTGCAGTGCCTTATATCCATGCAACCCCCTGCTGCGCACCCTCTNNNNNNNNNNNNNNNNNNNNNNNNNNNNNNNNNNNNNNNNNNNNNNNNNNNNNNNNNNNNNNNNNNNNNNNNNNACTTTTTGTCCCTAGCAACTTTAAGAGAACATAATTCCAACACAGAGACCCTCCCGATCACTCCCATCTACCACCTCCTTGCCTCCATCCTGTCCAGC	15870:194:-
smaw_01_21845950	C01	21845950	3	+	T	C	GCTACAGTTCACTGCTGTTAATTGCCGCTAAATGTTTTTAATCAGTTTCTGAAAGAGTGATTACATCAGGGAGGCGTCGCAGTCCNNNNNNNNNNNNNNNNNNNNNNNNNNNNNNNNNNNNNNNNNNNNNNNNNNNNNNNNNNNNNNNNNNNNNNNNNTTGTCGGACGAGTGACAGATACGAGCTCTGTCGTGGCCGTTGGGGCTACGGGTGCAGGCGGCGCGCGAACGGAGAGGCAAACTTGAGATTTTTAAAACCCCGGCGC	15899:3:+
smaw_01_21848280	C01	21848280	81	-	A	G	TCATAGAATATGCACAGTTCGCCAAAACAAACAAGTTGGGCCACGATGCCACTGCATCCACAAACAAGATCTGGGTTACATGAGGNNNNNNNNNNNNNNNNNNNNNNNNNNNNNNNNNNNNNNNNNNNNNNNNNNNNNNNNNNGCCAGGGCTCATCACTTCCTCAGCTCTCTGTGTGTGCCTACATGAGGTTTGTGTGTGAGCAGGCTTTCAACCTTTGGTGAGAGTC	15902:81:-
smaw_01_21860674	C01	21860674	286	+	G	A	ACAGTGAGTGCGCAAACCATTCACATGCGCTCACACACAGACTGTCACATCAGCACTCTTACCCCCCCTCCCCTCCTCCCCTTTCNNNNNNNNNNNNNNNNNNNNNNNNNNNNNNNNNNNNNNNNNNNNNNNNNNNNNNNNNNNNNNNNNNNNNNNNNNNNNNNNNNNNNNNNNNNNNNNNNNNNNNNNNNNNNNNNNNNNNNNNGCCTGATGTGTGCATTGCCCTGTTCCAGCAGAGAAAACCTTGTGGTGACGGCCTCGTAGACGGACTGATTACAGCGTTCCGTCAGTCCCCAC	15907:286:+
smaw_01_21873524	C01	21873524	312	-	G	A	TGAGGCCTAAGGAGGGTTAGGTAGCTGCACTGTGAAATAAGGCTCCTCTCTGCCGTCTCTAGCGCAGGGCCAGCAGGGCACCCGTNNNNNNNNNNNNNNNNNNNNNNNNNNNNNNNNNNNNNNNNNNNNNNNNNNNNNNNNNNNNNNNNNNNNNNNNNNNNNNNNNNNNNNNNNNNNNNNNNNNNNNNNNNNNNNNNCTGAAAGCGGCGGGAAGCCGCTCCCCCACTGCTCCCCCAAACTCCACATTCGCTCCAGTCAATGTCCGTGCAATTACAGCCGTGAATATGTGTGCGGATGCATTTGTAAGCGTGCGANNNNNNNNNNNNNNNNNNNNNNNNNNNNNNNNNNNNNNNNNTAGTATTAACACGTAGGCTCTCAAACAAACGGGGATGACACACA…	15920:312:-
[truncated: 24,507 more rows]
