# Supplementary material for: Genomic Signatures After Five Generations of Intensive Selective Breeding: Runs of Homozygosity and Genetic Diversity in Representative Domestic and Wild Populations of Turbot (Scophthalmus maximus)
Source: Front Genet. 2020 Apr 3;11:296. doi: 10.3389/fgene.2020.00296 (PMC7169425; doi:10.3389/fgene.2020.00296)
Supplement: Supplementary file 5 [file Table_5.xlsx]

## Sheet: Hoja1
Supplementary Table 5. Mean (µ) for the number of ROH, ROH size, total sum of ROH and FROH for different families grouped by their parent’s kinship coefficient (θIBD). Only ROH longer than 1 Mb were considered. Families were categorized as follows: Unrelated (0< θIBD <0.0076), first cousin (0.038< θIBD <0.0937), half-sibling (0.0937< θIBD <0.1872) and full-sibling (θIBD >0.1872). Results are show…
IBD category		18,198 SNP panel		21,615 SNP panel		25,511 SNP panel		CV (%)
		0 Het	1 Het	0 Het	1 Het	0 Het	1 Het	0 Het	1 Het
0 < θIBD < 0.0076	µ ROH number	4.08	4.98	4.85	4.66	5.78	6.5	17.36	18.27
	µ ROH size	3621.8	3343.2	2447.1	3192.2	1,91.4	2606.2	83.54	12.78
	µ total ROH sum	15232.5	17845.4	12033.7	16141.4	11739.7	18150.8	14.9	6.23
	µ FROH	0.02	0.0318	0.0214	0.0288	0.0209	0.0324	3.42	6.22
0.038 < θIBD < 0.0937	µ ROH number	7.08	7.84	9.58	7.83	11.67	11.15	24.34	21.41
	µ ROH size	4409.4	4511.4	2782	4304.76	2248.1	3270.3	35.78	16.51
	µ total ROH sum	31873.8	36027.5	26559.8	34027.2	26429.5	37265.4	10.98	4.57
	µ FROH	0.056	0.0643	0.0474	0.0619	0.0471	0.0665	10.07	3.58
0.0937 < θIBD < 0.1872	µ ROH number	11.9	12.09	16.8	12.21	20.96	17.26	27.4	21.3
	µ ROH size	4691.6	5184.4	2883	4450.3	2298.1	3743.1	37.92	16.16
	µ total ROH sum	55916.8	61701.8	48325.5	59598.4	47962.1	64443.2	8.85	3.92
	µ FROH	0.099	0.1101	0.0862	0.106	0.085	0.1151	8.62	4.13
θIBD > 0.1872	µ ROH number	19.6	19.15	32.7	19.96	42.1	28.44	35.91	22.85
	µ ROH size	6188	6714.14	3163.9	6449.3	2418.5	4688.9	50.88	18.5
	µ total ROH sum	120728	128276	103257	127939	101902	133100	9.67	2.22
	µ FROH	0.215	0.229	0.1843	0.228	0.1819	0.2376	9.53	2.28
