# Supplementary material for: Genomic Signatures After Five Generations of Intensive Selective Breeding: Runs of Homozygosity and Genetic Diversity in Representative Domestic and Wild Populations of Turbot (Scophthalmus maximus)
Source: Front Genet. 2020 Apr 3;11:296. doi: 10.3389/fgene.2020.00296 (PMC7169425; doi:10.3389/fgene.2020.00296)
Supplement: Supplementary file 6 [file Table_6.xlsx]

## Sheet: fish.rohi
Supplementary Table 6. ROHi found in the domestic turbot population. For each ROHi, the chromosomic position, length, number and percentage of individuals where they were found are shown. Both the broodstock and offspring were considered in order to find frequent ROHi in the domestic population.
chromosome	starting position	final position	length (Mb)	number of individuals	percentage of individuals	percentage of chromosome covered by ROHi
C01	21150000	24250000	3.1	190.323	13.2721	9.71738
C02	5500000	5550000	0.05	182	12.6918	0.209761
C02	5750000	6050000	0.3	181.167	12.6337	1.25856
C02	18250000	19150000	0.9	245.5	17.1199	3.77569
C03	20100000	20250000	0.15	253.667	17.6894	0.621619
C03	20600000	21900000	1.3	250.231	17.4498	5.38737
C04	1200000	1550000	0.35	167.714	11.6956	1.13144
C04	2750000	3450000	0.7	168.286	11.7354	2.26287
C04	3800000	4250000	0.45	161.889	11.2893	1.4547
C04	4550000	5650000	1.1	186.955	13.0373	3.55594
C05	6050000	6100000	0.05	167	11.6457	0.169488
C05	6500000	7000000	0.05	169	11.7852	1.69488
C05	8050000	8400000	0.35	183.143	12.7715	1.18641
C05	11500000	12200000	0.7	179	12.4826	2.37283
C05	13400000	14800000	1.4	186.25	12.9881	4.74565
C07	6000000	6250000	0.25	219.4	15.2999	0.930139
C07	11450000	11500000	0.05	211	14.7141	0.186028
C07	11650000	11750000	0.1	211.5	14.749	0.372055
C07	14750000	15450000	0.7	224.286	15.6406	2.60439
C11	15600000	15650000	0.05	191	13.3194	0.199193
C11	19600000	19650000	0.05	195	13.5983	0.199193
C12	15650000	16450000	0.8	206.938	14.4308	3.22433
C12	19950000	21250000	1.3	177.923	12.4075	5.23953
C13	5250000	5350000	0.1	169.5	11.8201	0.407959
C13	16000000	16950000	0.95	175	12.2036	3.87561
C13	17000000	17100000	0.05	168	11.7155	0.407959
C13	17100000	17300000	0.2	177.25	12.3605	0.815918
C13	17350000	17400000	0.05	169	11.7852	0.20398
C13	17650000	18800000	1.15	177.043	12.3461	4.69153
C13	20750000	21950000	1.2	169	11.7852	4.89551
C14	7550000	8350000	0.8	236.062	16.4618	3.51595
C14	13000000	14200000	1.2	298.5	20.8159	5.27393
C15	12850000	13250000	0.4	200.5	13.9819	1.83628
C16	2550000	3300000	0.75	228.2	15.9135	3.4961
C16	3350000	3400000	0.05	209	14.5746	0.233073
C16	19950000	21300000	1.35	241.296	16.8268	6.29297
C17	7600000	8750000	1.15	225	15.6904	5.37304
C17	9500000	10000000	0.5	233.4	16.2762	2.33611
C18	10950000	11000000	0.05	188	13.1102	0.234119
C18	11150000	11300000	0.15	185	12.901	0.702357
C18	11500000	14500000	3	220.583	15.3824	14.0471
C19	2600000	3400000	0.8	209.562	14.6138	3.94897
C19	12800000	13400000	0.6	209	14.5746	2.96173
C20	8500000	9300000	0.8	227.562	15.8691	4.01763
C20	16850000	17200000	0.35	215	14.993	1.75771
C20	17500000	18900000	1.4	223.071	15.5559	7.03085
C21	9900000	10350000	0.45	169.667	11.8317	2.83322
C21	11400000	11450000	0.05	159	11.0879	0.314803
C22	11350000	11450000	0.1	162	11.2971	0.670299
